# Supplementary material
Source: bioRxiv or medRxiv preprint supplement (https://www.biorxiv.org/content/biorxiv/early/2022/05/26/2022.05.26.493529/DC2/embed/media-2.pdf)
Supplement: Supplementary file [file media-2.pdf]

We gratefully acknowledge the following Authors from the Originating laboratories responsible for obtaining the specimens, as well as the Submitting laboratories where the genome data were generated and shared via GISAID, on which this research is based.

All Submitters of data may be contacted directly via [www.gisaid.org](http://www.gisaid.org)

Authors are sorted alphabetically.

Acknowledgement EPI\_SET Identifier: EPI\_SET\_20220304yv

| Accession ID                                                                                                          | Originating Laboratory                                                                                                                                                                                                                                                                                                                                                                                                                                                                        | Submitting Laboratory                                                                                                                                                                                                                                                                                                                                                     | Authors                                                                                                                                                                                                                                                                                                                                                                                                                                                                                                                                                                                                                                                                                                                                                                              |
|-----------------------------------------------------------------------------------------------------------------------|-----------------------------------------------------------------------------------------------------------------------------------------------------------------------------------------------------------------------------------------------------------------------------------------------------------------------------------------------------------------------------------------------------------------------------------------------------------------------------------------------|---------------------------------------------------------------------------------------------------------------------------------------------------------------------------------------------------------------------------------------------------------------------------------------------------------------------------------------------------------------------------|--------------------------------------------------------------------------------------------------------------------------------------------------------------------------------------------------------------------------------------------------------------------------------------------------------------------------------------------------------------------------------------------------------------------------------------------------------------------------------------------------------------------------------------------------------------------------------------------------------------------------------------------------------------------------------------------------------------------------------------------------------------------------------------|
| EPI_ISL_7265737                                                                                                       | "AK State Public Health Lab, State Health Department"                                                                                                                                                                                                                                                                                                                                                                                                                                         | Centers for Disease Control and Prevention Division of Viral Diseases, Pathogen Discovery                                                                                                                                                                                                                                                                                 | Alex Burgin; Ben Rambo-Martin; Clinton Paden; Dakota Howard; Dave Wentworth; Dhwani Batra; Jasmine Padilla; Joseph Madden; Justin Lee; Kristen Knipe; Kristine Lacey; Mark Burroughs; Matthew Schmerer; Meghan Bentz; Mili Sheth; Peter Cook; Sam Shepard; Sarah Nobles; Vivien Dugan; Yvette Unoarumhi                                                                                                                                                                                                                                                                                                                                                                                                                                                                              |
| EPI_ISL_9429979                                                                                                       | "CBR,IISc"                                                                                                                                                                                                                                                                                                                                                                                                                                                                                    | CBR,IISc                                                                                                                                                                                                                                                                                                                                                                  | "Bratati Kahail"                                                                                                                                                                                                                                                                                                                                                                                                                                                                                                                                                                                                                                                                                                                                                                     |
| EPI_ISL_2987030                                                                                                       | "CO Dept. of Public Health and Environment, Lab Services Division"                                                                                                                                                                                                                                                                                                                                                                                                                            | Centers for Disease Control and Prevention Division of Viral Diseases, Pathogen Discovery                                                                                                                                                                                                                                                                                 | Alison Laufer Halpin; Ben L. Rambo-Martin; Clinton R. Paden; Dakota Howard; Darlene Wagner; Dave Wentworth; Dhwani Batra; Jasmine Padilla; Justin Lee; Katie Dillon; Krista Queen; Kristen Knipe; Kristine Lacey; Mark Burroughs; Matthew Schmerer; Mili Sheth; Peter Cook; Sam Shepard; Sarah Nobles; Shoshona Le; Suxiang Tong; Vivien Dugan; Yvette Unoarumhi                                                                                                                                                                                                                                                                                                                                                                                                                     |
| EPI_ISL_8258232                                                                                                       | "HI Dept. of Health, State Laboratories Division"                                                                                                                                                                                                                                                                                                                                                                                                                                             | Centers for Disease Control and Prevention Division of Viral Diseases, Pathogen Discovery                                                                                                                                                                                                                                                                                 | Alex Burgin; Ben Rambo-Martin; Clinton Paden; Dakota Howard; Dave Wentworth; Dhwani Batra; Jasmine Padilla; Joseph Madden; Justin Lee; Kristen Knipe; Kristine Lacey; Mark Burroughs; Matthew Schmerer; Meghan Bentz; Mili Sheth; Peter Cook; Sam Shepard; Sarah Nobles; Vivien Dugan; Yvette Unoarumhi                                                                                                                                                                                                                                                                                                                                                                                                                                                                              |
| EPI_ISL_1226038                                                                                                       | "MN PHL Division, Minnesota Department of Health"                                                                                                                                                                                                                                                                                                                                                                                                                                             | Genomics and Discovery, Respiratory Viruses Branch, Division of Viral Diseases, Centers for Disease Control and Prevention                                                                                                                                                                                                                                                | Anna Montmayeur; Anna Uehara; Ben L. Rambo-Martin; Clinton R. Paden; Dhwani Batra; Haibin Wang; Jasmine Padilla; Jing Zhang; Justin Lee; Katie Dillon; Krista Queen; Kristen Knipe; Kristine Lacey; Lori Rowe; Mark Burroughs; Matthew Schmerer; Mili Sheth; Peter W. Cook; Rachel Marine; Sam Shepard; Sarah Nobles; Shoshona Le; Suxiang Tong; Yan Li; Ying Tao                                                                                                                                                                                                                                                                                                                                                                                                                    |
| EPI_ISL_3354011                                                                                                       | "NYSDOH Wadsworth Center, Virology Lab"                                                                                                                                                                                                                                                                                                                                                                                                                                                       | Centers for Disease Control and Prevention Division of Viral Diseases, Pathogen Discovery                                                                                                                                                                                                                                                                                 | Alex Burgin; Ben Rambo-Martin; Clinton Paden; Dakota Howard; Dave Wentworth; Dhwani Batra; Jasmine Padilla; Justin Lee; Krista Queen; Kristen Knipe; Kristine Lacey; Mark Burroughs; Matthew Schmerer; Meghan Bentz; Mili Sheth; Peter Cook; Sam Shepard; Sarah Nobles; Suxiang Tong; Vivien Dugan; Yvette Unoarumhi                                                                                                                                                                                                                                                                                                                                                                                                                                                                 |
| EPI_ISL_1318447                                                                                                       | "TX DSHS, Lab Services Section MC 1947"                                                                                                                                                                                                                                                                                                                                                                                                                                                       | Centers for Disease Control and Prevention Division of Viral Diseases, Pathogen Discovery                                                                                                                                                                                                                                                                                 | Anna Montmayeur; Anna Uehara; Ben L. Rambo-Martin; Clinton R. Paden; Dhwani Batra; Haibin Wang; Jasmine Padilla; Jing Zhang; Justin Lee; Katie Dillon; Krista Queen; Kristen Knipe; Kristine Lacey; Lori Rowe; Mark Burroughs; Matthew Schmerer; Mili Sheth; Peter W. Cook; Rachel Marine; Sam Shepard; Sarah Nobles; Shoshona Le; Suxiang Tong; Yan Li; Ying Tao                                                                                                                                                                                                                                                                                                                                                                                                                    |
| EPI_ISL_5860536                                                                                                       | 1 Wojskowy Szpital Kliniczny z Poliklinika SP ZOZ.                                                                                                                                                                                                                                                                                                                                                                                                                                            | Wojewodzka Stacja Sanitarno-Epidemiologiczna w Rzeszowie, Laboratorium Diagnostyki Medycznej                                                                                                                                                                                                                                                                              | Anna Nowakowska; Karolina Ostrowska; Katarzyna Wilk; Marzena Baranowska                                                                                                                                                                                                                                                                                                                                                                                                                                                                                                                                                                                                                                                                                                              |
| EPI_ISL_707697                                                                                                        | 1-Laboratory of Microbiology, National Reference Lab, Charles Nicolle Hospital; 2-University of Tunis ElManar, Faculty of Medicine of Tunis, LR99E509, Tunis, Tunisia                                                                                                                                                                                                                                                                                                                         | 1-Clinical and Experimental Pharmacology Lab, LR16SP02, National Center of Pharmacovigilance, University of Tunis El Manar, Tunis, Tunisia. 2- Neurodegenerative diseases and psychiatric troubles, LR18SP03, Razi Hospital, University of Tunis El Manar, Tunis, Tunisia. 3- Ministry of Health, National Observatory of New and Emerging Diseases, 1006, Tunis, Tunisia | Alia Ben Kahla; Asma Ferjani; Gaies Emna; Habiba Ben Romdhane; Hanen El Jebari; Ilhem Boutibia-Ben Boubaker; Jalila Ben Khellil; Maher Kharrat; Mouna Ben Sassi; Mouna Safer; Nissaf Ben Alaya; Riadh Daghfous; Riadh Gouider.; Rouaa Ben Othman; Salma Abidi; Sameh Trabelsi; Sana Ferjani; Souissi Amira; Zaineib Hamzaoui                                                                                                                                                                                                                                                                                                                                                                                                                                                         |
| EPI_ISL_1402667                                                                                                       | 1. Główny Inspektorat Sanitarny. 2. Diagnostyka. Laboratoria Medyczne.                                                                                                                                                                                                                                                                                                                                                                                                                        | 1. ViroGenetics - BSL3 Laboratory of Virology, Malopolska Centre of Biotechnology, Jagiellonian University; 2. genXone SA, Research & Development Laboratory                                                                                                                                                                                                              | Aleksandra Gidlewicz; Anna Brylak; Gromowski, T.; Grzegorz Nowicki; Jakub Grabowski; Karol Szeszko; Kowalski, M.; Labaj; Maciej Sykulski; Mazur-Panasiuk, N.; Michał Kaszuba; Natalia Drweska-Matelska; P.P.; Pyrc, K.; Sylwia Januszczak; Szulc, P.; Łukasz Krych                                                                                                                                                                                                                                                                                                                                                                                                                                                                                                                   |
| EPI_ISL_1340984                                                                                                       | 1. Główny Inspektorat Sanitarny; 2. Diagnostyka. Laboratoria Medyczne.                                                                                                                                                                                                                                                                                                                                                                                                                        | 1. ViroGenetics - BSL3 Laboratory of Virology, Malopolska Centre of Biotechnology, Jagiellonian University; 2. Diagtron Laboratoria Lukasz Rabalski                                                                                                                                                                                                                       | Gromowski, T.; Kowalski, M.; Labaj; Maciej Kosinski; Mazur-Panasiuk, N.; Natalia Derewonko; P.P.; Pyrc, K.; Rabalski L.; Sylwia Januszczak; Szulc, P.                                                                                                                                                                                                                                                                                                                                                                                                                                                                                                                                                                                                                                |
| EPI_ISL_882763                                                                                                        | 1.AO Universitaria 'S. Giovanni di Dio e Ruggi D'Aragona, Scuola Medica Salernitana' Hospital / 2.UOC di Virologia e Microbiologia, Università della Campania 'L. Vanvitelli' / 3.AO Universitaria 'Federico II' Napoli Hospital / 4.AORN 'San Giuseppe Moscati' Avellino Hospital / 5.AO 'San Pio - presidio G. Rummo' Benevento Hospital / 6.AO 'Sant'Anna e San Sebastiano' Caserta Hospital / 7.PO 'Maria Santissima Addolorata' Eboli Hospital / 8.Biogen Istituto di Ricerche Genetiche | 1. Genome Research Center for Health (CRGS) / 2. Laboratory of Molecular Medicine and Genomics(LMMG) / 3. Center for Research in Pure and Applied Mathematics (CRMPA)                                                                                                                                                                                                     | Alessandro Weisz; Alessia Cossu; Aniello Gentile; Annamaria Salvati; Antonello Saccomanno; Arnolfo Petruzzello; Assunta Sellitto; Carlo Ferravante; Domenico Memoli; Domenico Palumbo; Elena Alexandrova; Emilia Vaccaro; Francesca Marciano; Francesca Rizzo; Gianluigi Franci; Giorgio Giurato; Giovanni Nassa; Giovanni Pecoraro; Giuseppe Penza; Giuseppe Portella; Gregorio Goffredi; Iaria Terenzi; Jessica Lambert; Maddalena Schioppa; Maria Grazia Foti; Maria Landi; Marianna Scrima; Mariarosaria Ingino; Massimiliano Galdiero; Maurizio Fumi; Michele Caraglia; Michele Cennamo; Oriana Strianese; Pasquale Pagliano; Rita Greco; Roberta Tarallo; Sonia Amabile; Teresa Rocco; Valeria Mirici Cappa; Vincenzo Rocco; Viola Melone; Vittoria Letizia; Ylenia D'Agostino |
| EPI_ISL_7309882, EPI_ISL_7309883, EPI_ISL_7309884, EPI_ISL_7309885, EPI_ISL_7309886, EPI_ISL_7309887, EPI_ISL_7309888 | see above                                                                                                                                                                                                                                                                                                                                                                                                                                                                                     | 108 Military Central Hospital, Vietnamese-German Center for Medical Research (VG-CARE)                                                                                                                                                                                                                                                                                    | Vietnamese-German Center for Medical Research, VG-CARE                                                                                                                                                                                                                                                                                                                                                                                                                                                                                                                                                                                                                                                                                                                               |
| EPI_ISL_3426207, EPI_ISL_3931320, EPI_ISL_4055434, EPI_ISL_6268071, EPI_ISL_7264558, EPI_ISL_7987352                  | 4Cyte Pathology                                                                                                                                                                                                                                                                                                                                                                                                                                                                               | NSW Health Pathology - Institute of Clinical Pathology and Medical Research; Westmead Hospital; University of Sydney                                                                                                                                                                                                                                                      | Amott A.; Draper J.; Gail M.; Martinez E.; Rockett R.; Sintchenko V.; on behalf of ICPMR                                                                                                                                                                                                                                                                                                                                                                                                                                                                                                                                                                                                                                                                                             |
| EPI_ISL_7606634, EPI_ISL_4021415, EPI_ISL_7606498, EPI_ISL_8132972, EPI_ISL_1854361                                   | A.S.L. CITTA' DI TORINO - OSPEDALE AMEDEO DI SAVOIA<br>A.S.L. CN1<br>A.S.L. NOVARA - ISTITUTO S.S. TRINITA - BORGOMANERO<br>A.S.L. TO4<br>ABC Algarve                                                                                                                                                                                                                                                                                                                                         | Fondazione del Piemonte per l'Oncologia IRCCS<br>Fondazione del Piemonte per l'Oncologia IRCCS<br>Fondazione del Piemonte per l'Oncologia IRCCS<br>Fondazione del Piemonte per l'Oncologia IRCCS<br>Instituto Nacional de Saude (INSA) and Centro de Investigaçao em Biodiversidade e Recursos Geneticos (CIBIO), Universidade do Porto                                   | Antonino Sottile; Giorgio Giardina; Paola Marino; Silvia Brossa<br>Antonino Sottile; Giorgio Giardina; Paola Marino; Silvia Brossa<br>Antonino Sottile; Giorgio Giardina; Paola Marino; Silvia Brossa<br>Antonino Sottile; Giorgio Giardina; Paola Marino; Silvia Brossa<br>Borges et al                                                                                                                                                                                                                                                                                                                                                                                                                                                                                             |
| EPI_ISL_7569915                                                                                                       | ACT Pathology                                                                                                                                                                                                                                                                                                                                                                                                                                                                                 | Schwessinger Lab                                                                                                                                                                                                                                                                                                                                                          | Ashley Jones; Austin Bird; Bayantes Dagvadorj; Benjamin Schwessinger; Carl McCombe; Carolina Correa Ospina; Catalina Barragán Quintero; Craig Kennedy; Elise Kellett; Emma Crean; Evie Hodgson; Gabrielle Smith; Karina Kennedy; Rachel Leonard; Rene Riedelbauch; Robyn Hall; Salome Wilson; Scott Ferguson                                                                                                                                                                                                                                                                                                                                                                                                                                                                         |
| EPI_ISL_861141                                                                                                        | ADIRONDAK MEDICAL CENTER                                                                                                                                                                                                                                                                                                                                                                                                                                                                      | Wadsworth Center, New York State Department of Health                                                                                                                                                                                                                                                                                                                     | Alexis Russel; Daryl M. Lamson; Erasmus Schneider; Erica Lasek-Nesselquist; John Kelly; Jonathan Pitnick; Kirsten St. George; Matthew Shudt; Melissa A Leisner; Navjot Singh                                                                                                                                                                                                                                                                                                                                                                                                                                                                                                                                                                                                         |
| EPI_ISL_2226679, EPI_ISL_2226725                                                                                      | ADMED Microbiologie                                                                                                                                                                                                                                                                                                                                                                                                                                                                           | Genomics and Transcriptomics, Philip Morris International                                                                                                                                                                                                                                                                                                                 | David Bornand; Emmanuel Guedj; Manuel Peitsch; Marie-Lise Tritten; Maxime Berthouzz; Mehdi Auberson; Nicolas Sierro; Nikolai Ivanov; Reto Lienhard; Rémi Dulize                                                                                                                                                                                                                                                                                                                                                                                                                                                                                                                                                                                                                      |
| EPI_ISL_4170515, EPI_ISL_4170530, EPI_ISL_4578026, EPI_ISL_918439                                                     | ADPH<br>AIID                                                                                                                                                                                                                                                                                                                                                                                                                                                                                  | ADPH<br>Irish Coronavirus Sequencing Consortium-Teagasc Grange                                                                                                                                                                                                                                                                                                            | Adrianna Walker<br>Aijandro Abner Garcia Leon; Calum Walsh; Fiona Crispie; Gabriel Gonzalez; John Kenny; Matthew McCabe; Michael Carr; Patrick Mallon; Paul Cotter                                                                                                                                                                                                                                                                                                                                                                                                                                                                                                                                                                                                                   |
| EPI_ISL_2787758, EPI_ISL_4458030                                                                                      | AL Dept. of Public Health Bureau of Clinical Laboratories                                                                                                                                                                                                                                                                                                                                                                                                                                     | Centers for Disease Control and Prevention Division of Viral Diseases, Pathogen Discovery                                                                                                                                                                                                                                                                                 | Alison Laufer Halpin; Becky Tsai; Ben L. Rambo-Martin; Benafsh Sapra; Benjamin Rambo-Martin; Christopher Gulvick; Clinton Paden; Clinton R. Paden; Dakota Howard; Darlene Wagner; Dave Wentworth; Dhwani Batra; Doreen Ng; Duncan MacCannell; Erisa Sula; Harry Gao; James Xie; Jasmine Padilla; Jason Caravas; John Gao; Joseph Fierra; Justin Lee; Katie Dillon; Krista Queen; Kristen Knipe; Kristine Lacey; Mark Burroughs; Matthew Schmerer; Mickey Li; Mili Sheth; Peter Cook; Sam Shepard; Sarah Nobles; Scott Sammons; Shatavia Morrison; Shoshona Le; Suxiang Tong; Tymeckia Kendall; Victoria Caban Figueroa; Vivien Dugan; Yan Meng; Yvette Unoarumhi                                                                                                                     |
| EPI_ISL_2115522                                                                                                       | ALB FILS KLINIKEN GmbH - Institut für Laboratoriumsmedizin Klinik am Eichert Gappingen                                                                                                                                                                                                                                                                                                                                                                                                        | Robert Koch Institute                                                                                                                                                                                                                                                                                                                                                     |                                                                                                                                                                                                                                                                                                                                                                                                                                                                                                                                                                                                                                                                                                                                                                                      |
| EPI_ISL_6956213                                                                                                       | ALB FILS KLINIKEN GmbH - Institut für Laboratoriumsmedizin Klinik am Eichert Gappingen                                                                                                                                                                                                                                                                                                                                                                                                        | Robert Koch Institute                                                                                                                                                                                                                                                                                                                                                     |                                                                                                                                                                                                                                                                                                                                                                                                                                                                                                                                                                                                                                                                                                                                                                                      |
| EPI_ISL_1227790                                                                                                       | ALBANY MEDICAL CENTER                                                                                                                                                                                                                                                                                                                                                                                                                                                                         | Wadsworth Center, New York State Department of Health                                                                                                                                                                                                                                                                                                                     | Alexis Russel; Daryl M. Lamson; Erasmus Schneider; Erica Lasek-Nesselquist; John Kelly; Jonathan Pitnick; Kirsten St. George; Matthew Shudt; Melissa A Leisner; Navjot Singh                                                                                                                                                                                                                                                                                                                                                                                                                                                                                                                                                                                                         |
| EPI_ISL_6900076                                                                                                       | AMPATH                                                                                                                                                                                                                                                                                                                                                                                                                                                                                        | National Institute for Communicable Diseases of the National Health Laboratory Service                                                                                                                                                                                                                                                                                    | Amoako DG; Bhiman JN; Everatt J; Ismail A; Mahlangu B; Mnguni A; Mohale T; Ntuli N; Scheepers C                                                                                                                                                                                                                                                                                                                                                                                                                                                                                                                                                                                                                                                                                      |
| EPI_ISL_2231609, EPI_ISL_2231620, EPI_ISL_2660791, EPI_ISL_3060523, EPI_ISL_3453693, EPI_ISL_5416714, EPI_ISL_8500405 | see above                                                                                                                                                                                                                                                                                                                                                                                                                                                                                     | AP SSO                                                                                                                                                                                                                                                                                                                                                                    | CSIR-Centre for Cellular and Molecular Biology-INSACOG                                                                                                                                                                                                                                                                                                                                                                                                                                                                                                                                                                                                                                                                                                                               |
| EPI_ISL_2384172                                                                                                       | AR Dept. of Health-PHL, Molecular Diagnostics                                                                                                                                                                                                                                                                                                                                                                                                                                                 | Centers for Disease Control and Prevention Division                                                                                                                                                                                                                                                                                                                       | Alison Laufer Halpin; Ben L. Rambo-Martin; Clinton R. Paden; Dakota Howard; Darlene Wagner; Dave Wentworth; Dhwani Batra; Jasmine Padilla; Justin Lee; Katie Dillon; Krista Queen; Kristen Knipe; Kristine Lacey; Mark Burroughs; Matthew Schmerer; Mili Sheth;                                                                                                                                                                                                                                                                                                                                                                                                                                                                                                                      |



|                                                                                                                                                                                                                                                                                                                                                                                                                                                                                                                                                                                                                             |                                                                                                     |                                                                                                                                            |                                                                                                                                                                                                                                                                                                                                                                                                                                                                                                                                                                                                                                                                                                                                                                                                                                                                                                                                                                                                          |
|-----------------------------------------------------------------------------------------------------------------------------------------------------------------------------------------------------------------------------------------------------------------------------------------------------------------------------------------------------------------------------------------------------------------------------------------------------------------------------------------------------------------------------------------------------------------------------------------------------------------------------|-----------------------------------------------------------------------------------------------------|--------------------------------------------------------------------------------------------------------------------------------------------|----------------------------------------------------------------------------------------------------------------------------------------------------------------------------------------------------------------------------------------------------------------------------------------------------------------------------------------------------------------------------------------------------------------------------------------------------------------------------------------------------------------------------------------------------------------------------------------------------------------------------------------------------------------------------------------------------------------------------------------------------------------------------------------------------------------------------------------------------------------------------------------------------------------------------------------------------------------------------------------------------------|
| EPI_ISL_6647365                                                                                                                                                                                                                                                                                                                                                                                                                                                                                                                                                                                                             | Analytica                                                                                           | Institute of Medical Virology                                                                                                              | Alexandra Trkola; Annette Audigé; Catharine Aquino; Cyril Shah; Daniel Ehrsam; Gabriela Ziltener; Guido Bloemberg; Hubert Rehrauer; Isabel Stürmer; Joel Wirz; Jon Huder; Jürg Böni; Kevin Steiner; Maria Grünberg; Maryam Zaheri; Michael Huber; Riccarda Capau; Stefan Schmutz; Verena Kufner; Weihong Qi                                                                                                                                                                                                                                                                                                                                                                                                                                                                                                                                                                                                                                                                                              |
| EPI_ISL_7104282                                                                                                                                                                                                                                                                                                                                                                                                                                                                                                                                                                                                             | Aomori Prefectural Public Health and Environment Center                                             | Aomori Prefectural Public Health and Environment Center                                                                                    | Kazuhiro Ogasawara; Kentaro Itokawa; Kyohei Saka; Makoto Kuroda; Manami Musashi; Masanori Hashino; Motoko Bodajji; Rina Tanaka; Takashi Suzuki; Tsuyoshi Sekizuka; Yuki Ogawa                                                                                                                                                                                                                                                                                                                                                                                                                                                                                                                                                                                                                                                                                                                                                                                                                            |
| EPI_ISL_8132321                                                                                                                                                                                                                                                                                                                                                                                                                                                                                                                                                                                                             | Arcispedale Santa Maria Nuova Autoimmunita Allergologia e Biotecnologie Innovative"                 | Istituto Zooprofilattico Sperimentale della Lombardia e dell'Emilia Romagna (IZSLER), Risk Analysis and Genomic Epidemiology Unit          | Erika Scaltriti; Ilaria Menozzi; Marina Morganti; Stefano Pongolini                                                                                                                                                                                                                                                                                                                                                                                                                                                                                                                                                                                                                                                                                                                                                                                                                                                                                                                                      |
| EPI_ISL_678366                                                                                                                                                                                                                                                                                                                                                                                                                                                                                                                                                                                                              | Area of Virology, Serology and Virology Division (SAVID), New South Wales Health Pathology Randwick | Virology Research Laboratory; Area of Virology, Serology and Virology Division (SAVID), New South Wales Health Pathology Randwick          | Au, J.; Bull, R.; Deveson, I.; Foster, C.; Rawlinson, W.; Ruiz Silva, M.; Van Hal, S.                                                                                                                                                                                                                                                                                                                                                                                                                                                                                                                                                                                                                                                                                                                                                                                                                                                                                                                    |
| EPI_ISL_2249483, EPI_ISL_2716397, EPI_ISL_3031353                                                                                                                                                                                                                                                                                                                                                                                                                                                                                                                                                                           | Arizona State Public Health Laboratory                                                              | Arizona State Public Health Laboratory                                                                                                     | Jessica Escobar; Katherine Fullerton; Linda Getsinger; Matthew Contursi; Nobuko Fukushima; Stacy White; Trung Huynh; Victor Waddell                                                                                                                                                                                                                                                                                                                                                                                                                                                                                                                                                                                                                                                                                                                                                                                                                                                                      |
| EPI_ISL_1532580, EPI_ISL_2153598, EPI_ISL_4469313, EPI_ISL_4469540, EPI_ISL_4513269, EPI_ISL_4968253, EPI_ISL_5059634, EPI_ISL_5423915, EPI_ISL_5644426, EPI_ISL_5932856, EPI_ISL_6075070, EPI_ISL_6228132, EPI_ISL_7191858, EPI_ISL_7735480, EPI_ISL_7983801, EPI_ISL_8163184, EPI_ISL_8373829, EPI_ISL_8509207                                                                                                                                                                                                                                                                                                            | see above                                                                                           | Arizona State University                                                                                                                   | Ajeet Bains; Efreem S. Lim; Emily A. Kaelin; James C. Hu; Joshua LaBaer; Joy M. Blain; Kristina Buss; LaRinda A. Holland; Matthew F. Smith; Nathaniel Johnson; Neal W Woodbury; Nicholas J. Mellor; Peter T. Skidmore; Rabia Maqsood; Regan A. Sullins; Steven C. Holland; Valerie Harris; Vel Murugan                                                                                                                                                                                                                                                                                                                                                                                                                                                                                                                                                                                                                                                                                                   |
| EPI_ISL_3256340, EPI_ISL_3474170                                                                                                                                                                                                                                                                                                                                                                                                                                                                                                                                                                                            | Arkansas Public Health Laboratory, Arkansas Department of Health                                    | University of Minnesota Genomics Center                                                                                                    | Corbin Dirck; Daryl M. Gohl; Jaquelyn Kuriger-Laber; John Garbe                                                                                                                                                                                                                                                                                                                                                                                                                                                                                                                                                                                                                                                                                                                                                                                                                                                                                                                                          |
| EPI_ISL_2285800                                                                                                                                                                                                                                                                                                                                                                                                                                                                                                                                                                                                             | Arlon                                                                                               | Plateforme de testing Namuroise                                                                                                            | Degossier Jonathan; Denis Olivier; Lesly Nyinkeu Kemamen; Mullier François; Otto Gaetan                                                                                                                                                                                                                                                                                                                                                                                                                                                                                                                                                                                                                                                                                                                                                                                                                                                                                                                  |
| EPI_ISL_7372697, EPI_ISL_7372707                                                                                                                                                                                                                                                                                                                                                                                                                                                                                                                                                                                            | Aspirar Medical Lab                                                                                 | WVU and Marshall University Combined Genomics Core Facilities                                                                              | James Denvir; Peter Perrotta; Peter Stoilov; Ryan Percifield; Wesley Kimble                                                                                                                                                                                                                                                                                                                                                                                                                                                                                                                                                                                                                                                                                                                                                                                                                                                                                                                              |
| EPI_ISL_5903131, EPI_ISL_5999707                                                                                                                                                                                                                                                                                                                                                                                                                                                                                                                                                                                            | Atlas Genomics                                                                                      | Seattle Flu Study                                                                                                                          | Amanda Adler; Barry R. Lutz; Benjamin Pelle; Brian Hiatt; Caitlin R. Wolf; Chris D. Frazier; Deborah A. Nickerson; Elisabeth Brandstetter; Erica Ryke; Geoff Melly; Helen Y. Chu; Janet A. Englund; Jay Shendure; Jover Lee; Kairsten Fay; Kirsten Lacombe; Lea M. Starita; Mark J. Rieder; Matthew Richardson; Matthew Thompson; Melissa Truong; Michael Boeckh; Michael Famulare; Misja Ilcisin; Peter D. Han; Philip Dykema; Romesh Gautam; Scott Lindquist; Thomas R. Sibley; Trevor Bedford                                                                                                                                                                                                                                                                                                                                                                                                                                                                                                         |
| EPI_ISL_9246289                                                                                                                                                                                                                                                                                                                                                                                                                                                                                                                                                                                                             | Atrium Health Wake Forest Baptist Microbiology Lab                                                  | Wake Forest School of Medicine, Internal Medicine                                                                                          | Gregory Hawkins; Kimberly Reeves                                                                                                                                                                                                                                                                                                                                                                                                                                                                                                                                                                                                                                                                                                                                                                                                                                                                                                                                                                         |
| EPI_ISL_3931378, EPI_ISL_4747865, EPI_ISL_7264617, EPI_ISL_7265296                                                                                                                                                                                                                                                                                                                                                                                                                                                                                                                                                          | Australian Clinical Labs (formerly Healthscope Pathology)                                           | NSW Health Pathology - Institute of Clinical Pathology and Medical Research; Westmead Hospital; University of Sydney                       | Arnott A.; Draper J.; Gall M.; Martinez E.; Rockett R.; Sintchenko V.; on behalf of ICPMR                                                                                                                                                                                                                                                                                                                                                                                                                                                                                                                                                                                                                                                                                                                                                                                                                                                                                                                |
| EPI_ISL_1495651, EPI_ISL_2427162, EPI_ISL_2887544, EPI_ISL_3307560, EPI_ISL_5735685, EPI_ISL_6332601                                                                                                                                                                                                                                                                                                                                                                                                                                                                                                                        | Austrian Agency for Health and Food Safety (AGES)                                                   | Berghaler laboratory, CeMM Research Center for Molecular Medicine of the Austrian Academy of Sciences                                      | Andreas Berghaler; Anna Schedl; Bekir Erguner; Benedikt Agerer; Christoph Bock; Fabian Amman; Jan Laine; Lukas Endler; Maelle Le Moing; Martin Senekowitsch; Matthew Thornton; Michael Schuster; Michelle Chan; Petr Triska; Thomas Penz                                                                                                                                                                                                                                                                                                                                                                                                                                                                                                                                                                                                                                                                                                                                                                 |
| EPI_ISL_2787073                                                                                                                                                                                                                                                                                                                                                                                                                                                                                                                                                                                                             | Azienda Ospedaliera San Camillo Forlanini                                                           | INMI Lazzaro Spallanzani IRCCS                                                                                                             | B Bartolini; CEM Gruber; D Cerini; D Di Fusco; E Sperandio; F Santini; G Bonfiglio; L Ciuffreda; O Butera                                                                                                                                                                                                                                                                                                                                                                                                                                                                                                                                                                                                                                                                                                                                                                                                                                                                                                |
| EPI_ISL_6666246                                                                                                                                                                                                                                                                                                                                                                                                                                                                                                                                                                                                             | Azienda Ospedaliero - Universitaria di Modena Policlinico - Virologia e Microbiologia Molecolare    | Istituto Zooprofilattico Sperimentale della Lombardia e dell'Emilia Romagna (IZSLER), Risk Analysis and Genomic Epidemiology Unit          | Erika Scaltriti; Ilaria Menozzi; Marina Morganti; Stefano Pongolini                                                                                                                                                                                                                                                                                                                                                                                                                                                                                                                                                                                                                                                                                                                                                                                                                                                                                                                                      |
| EPI_ISL_2787041                                                                                                                                                                                                                                                                                                                                                                                                                                                                                                                                                                                                             | Azienda Sanitaria Locale Roma 5                                                                     | INMI Lazzaro Spallanzani IRCCS                                                                                                             | B Bartolini; F Messina; F Santini; G Orlandi; M Meledandri; M Palocca; M Rueca; ML Schiavone; O Butera                                                                                                                                                                                                                                                                                                                                                                                                                                                                                                                                                                                                                                                                                                                                                                                                                                                                                                   |
| EPI_ISL_1222900, EPI_ISL_1941566, EPI_ISL_2318956                                                                                                                                                                                                                                                                                                                                                                                                                                                                                                                                                                           | Azienda Sanitaria dell'Alto Adige Laboratorio Aziendale di Microbiologia e Virologia                | Istituto di Genomica Applicata                                                                                                             | Davide Scaglione; Eleonora Paparelli; Elisa Masi; Elisabetta Giacobazzi; Elisabetta Pagani; Gabriele Magris; Irena Jurman; Irene Bianconi; Michele Morgante; Stefanie Wieser; Vera Vendramin                                                                                                                                                                                                                                                                                                                                                                                                                                                                                                                                                                                                                                                                                                                                                                                                             |
| EPI_ISL_973979, EPI_ISL_974209, EPI_ISL_974327, EPI_ISL_974799, EPI_ISL_974831, EPI_ISL_975078, EPI_ISL_975796, EPI_ISL_976303, EPI_ISL_2498590, EPI_ISL_2499339, EPI_ISL_2522272, EPI_ISL_2522724, EPI_ISL_2523731, EPI_ISL_2524037, EPI_ISL_2524101, EPI_ISL_2524797, EPI_ISL_2524872, EPI_ISL_2524910, EPI_ISL_2526282, EPI_ISL_2526447, EPI_ISL_2527355, EPI_ISL_2527408, EPI_ISL_25300819, EPI_ISL_2530975, EPI_ISL_2531612, EPI_ISL_2531817, EPI_ISL_2653101, EPI_ISL_2653419, EPI_ISL_2653499, EPI_ISL_2653920, EPI_ISL_2654487, EPI_ISL_2654655, EPI_ISL_2656331, EPI_ISL_2656838, EPI_ISL_2720873, EPI_ISL_2722014 | see above                                                                                           | BCCDC Public Health Laboratory                                                                                                             | Ana Pacagnella; Corrinne Ng; Dan Fornika; John Tyson; Kim Macdonald; Kimia Kamelian; Linda Hoang; Loretta Janz; Mel Krajdin; Prystajecy Natalie; Robert Azana; Robert Azana Terry Snutch; Shannon Russell                                                                                                                                                                                                                                                                                                                                                                                                                                                                                                                                                                                                                                                                                                                                                                                                |
| EPI_ISL_5393894, EPI_ISL_6889106                                                                                                                                                                                                                                                                                                                                                                                                                                                                                                                                                                                            | BIO-REFERENCE LABORATORIES                                                                          | Wadsworth Center, New York State Department of Health                                                                                      | Alexis Russell; Catharine Prussing; Daryl M. Lamson; Erasmus Schneider; Erica Lasek-Nesselquist; John Kelly; Jonathan Plitnick; Kirsten St. George; Matthew Shudt; Melissa A Leisner; Navjot Singh                                                                                                                                                                                                                                                                                                                                                                                                                                                                                                                                                                                                                                                                                                                                                                                                       |
| EPI_ISL_802446                                                                                                                                                                                                                                                                                                                                                                                                                                                                                                                                                                                                              | BIO-REFERENCE LABORATORIES                                                                          | Wadsworth Center, New York State Department of Health                                                                                      | Alexis Russel; Daryl M. Lamson; Erasmus Schneider; Erica Lasek-Nesselquist; John Kelly; Jonathan Plitnick; Kirsten St. George; Matthew Shudt; Melissa A Leisner; Navjot Singh; Sara Griesemer                                                                                                                                                                                                                                                                                                                                                                                                                                                                                                                                                                                                                                                                                                                                                                                                            |
| EPI_ISL_6470690                                                                                                                                                                                                                                                                                                                                                                                                                                                                                                                                                                                                             | BIO67-BIOSPHERE                                                                                     | Department of Virology, Henri Mondor University Hospital, Assistance Publique Hôpitaux de Paris, Université Paris-Est Créteil, INSERM U955 | Alexandre Soulier; Christophe Rodriguez; Elisabeth Trawinski; Guillaume Gricourt; Jean-Michel Pawlowsky; Melissa N'Debi; Slim Fourati; Vanessa Demontant                                                                                                                                                                                                                                                                                                                                                                                                                                                                                                                                                                                                                                                                                                                                                                                                                                                 |
| EPI_ISL_2493778, EPI_ISL_3104816, EPI_ISL_4275687, EPI_ISL_5648536, EPI_ISL_5688310, EPI_ISL_5689180, EPI_ISL_6570282                                                                                                                                                                                                                                                                                                                                                                                                                                                                                                       | see above                                                                                           | BIOFAST                                                                                                                                    | Instituto Butantan                                                                                                                                                                                                                                                                                                                                                                                                                                                                                                                                                                                                                                                                                                                                                                                                                                                                                                                                                                                       |
| EPI_ISL_8120820                                                                                                                                                                                                                                                                                                                                                                                                                                                                                                                                                                                                             | BIOFFICE - LBM RAVEZIES                                                                             | CNR Virus des Infections Respiratoires - France SUD                                                                                        | Antonio Jorge Martins; Claudia Renata dos Santos Barros; David Schlesinger; Debora Botequiu Moretti; Dimas Tadeu Covas; Elaine Cristina Marqueze; Elaine Vieira Santos; Evandra Strazza Rodrigues; Heidge Fukumasu; Jayme Augusto de Souza-Neto; José Salvatore Leister Patané; Luiz Alcantara; Luiz Lehmann Coutinho; Maria Carolina Elias; Maurício Lacerda Nogueira; Rafael dos Santos Bezerra; Raul Machado Neto; Rejane Maria Tommasini Grotto; Ricardo Haddad; Sandra Coccuzzo Sampaio Vessoni; Simone Kashima; Svetoslav Nanev Slavov; Vincent Louis Viala                                                                                                                                                                                                                                                                                                                                                                                                                                        |
| EPI_ISL_3634648, EPI_ISL_4325507                                                                                                                                                                                                                                                                                                                                                                                                                                                                                                                                                                                            | BIOLITTORAL BIOGROUP PLATEAU TECH                                                                   | CNR Virus des Infections Respiratoires - France SUD                                                                                        | Antonin Bal; Bruno Lina; Bruno Simon; Gregory Destras; Gwendolyne Burfin; Hadrien Regue; Laurence Josset; Martine Valette; Quentin Semanas                                                                                                                                                                                                                                                                                                                                                                                                                                                                                                                                                                                                                                                                                                                                                                                                                                                               |
| EPI_ISL_1135029, EPI_ISL_1313159, EPI_ISL_3130405                                                                                                                                                                                                                                                                                                                                                                                                                                                                                                                                                                           | BIOMNIS LYON                                                                                        | CNR Virus des Infections Respiratoires - France SUD                                                                                        | Antonin Bal; Bruno Lina; Bruno Simon; Gregory Destras; Gwendolyne Burfin; Hadrien Regue; Laurence Josset; Martine Valette; Quentin Semanas                                                                                                                                                                                                                                                                                                                                                                                                                                                                                                                                                                                                                                                                                                                                                                                                                                                               |
| EPI_ISL_2141719, EPI_ISL_9030777                                                                                                                                                                                                                                                                                                                                                                                                                                                                                                                                                                                            | BIOR                                                                                                | Latvian Biomedical Research and Study Centre                                                                                               | Aise Jakovele; Daina Pule; Davids Fridmanis; Elina Dimina; Guntars Zarins; Irena Meistere; Ivars Silamikelis; Janis Klovinis; Janis Pjalkovskis; Juris Porevoscikovs; Kaspars Megnis; Laila Silamikele; Lauma Freimane; Laura Ansons; Liga Birzniece; Monta Briviba; Monta Ustinova; Nikita Zrelovs; Uga Dumpis; Una Krumina; Vita Rovite                                                                                                                                                                                                                                                                                                                                                                                                                                                                                                                                                                                                                                                                |
| EPI_ISL_6134059                                                                                                                                                                                                                                                                                                                                                                                                                                                                                                                                                                                                             | BJMC,Pune                                                                                           | RF-IISER Pune                                                                                                                              | Aurnab Ghose; Joy Merwin Monteiro; Krishanpal Karmodiya; Rajesh Karyakarte; Suvarna Joshi                                                                                                                                                                                                                                                                                                                                                                                                                                                                                                                                                                                                                                                                                                                                                                                                                                                                                                                |
| EPI_ISL_2617540                                                                                                                                                                                                                                                                                                                                                                                                                                                                                                                                                                                                             | BLK Dan Penguian Alkes Semarang Jateng                                                              | National Institute of Health Research and Development                                                                                      | Arie Ardiansyah Nugraha; Hana Apsari Pawestri; Hartanti Dian Ikawati; Kartika Dewi Puspa; Krisna Pangesti; Nelly Puspandari; Subangkit; Triyani Soekarso; Vivi Setiawaty                                                                                                                                                                                                                                                                                                                                                                                                                                                                                                                                                                                                                                                                                                                                                                                                                                 |
| EPI_ISL_5142527, EPI_ISL_5142533, EPI_ISL_5142619, EPI_ISL_5142764, EPI_ISL_5142777, EPI_ISL_5142922, EPI_ISL_5142935, EPI_ISL_5199369, EPI_ISL_5199418                                                                                                                                                                                                                                                                                                                                                                                                                                                                     | see above                                                                                           | BTC, Khalifa University                                                                                                                    | Habiba Al Safar et al                                                                                                                                                                                                                                                                                                                                                                                                                                                                                                                                                                                                                                                                                                                                                                                                                                                                                                                                                                                    |
| EPI_ISL_2156319                                                                                                                                                                                                                                                                                                                                                                                                                                                                                                                                                                                                             | BULACAN MEDICAL CENTER                                                                              | Philippine Genome Center                                                                                                                   | Alethea R. de Guzman; Anna Ong-Lim; Arianne A. Zamora; Asia Louisa U. Chong; Benedict A. Maralit; Candice Francheska B. Tambaon; Carlo M. Lapid; Celia Carlos; Devon Ray Pacial; Edsel Maurice Salvaña; El King D. Morado; Elcid Aaron R. Pangilinan; Eva Maria Cutiongco-de la Paz; Francis A. Tablizo; Irish Coleen A. Asin; Jaime C. Montoya; Jan Michael C. Yap; Jo-Hannah S. Llames; John Q. Wong; Joshua Gregor A. Dizon; Juan Antonio R. Magalang; Karol Sophia Agape R. Padilla; Kenneth M. Kim; Kris P. Punayan; Marc Edsel C. Ayes; Marc jerrone R. Castro; Maria Rosario Singh-Vergeire and Cynthia P. Saloma; Maria Sofia L. Yangzon; Marissa Alejandria; Razel Nikka M. Hao; Rianna Patricia S. Cruz; Shiela Mae M. Araza                                                                                                                                                                                                                                                                   |
| EPI_ISL_4714868, EPI_ISL_5540143, EPI_ISL_5542750, EPI_ISL_5556092                                                                                                                                                                                                                                                                                                                                                                                                                                                                                                                                                          | Baguio General Hospital Medical Center (BGHMC)                                                      | Philippine Genome Center                                                                                                                   | Alethea R. de Guzman; Alyssa Joyce E. Telles; Anna Ong-Lim; Arianne A. Zamora; Benedict A. Maralit; Carlo M. Lapid; Celia Carlos; Cynthia P. Saloma; Devon Ray Pacial; Diomedes A. Cariño; Edsel Maurice Salvaña; El King D. Morado; Elcid Aaron R. Pangilinan; Eva Maria Cutiongco-de la Paz; Francis A. Tablizo; Henrietta Marie Rodriguez; Jaime C. Montoya; Jan Michael C. Yap; Jarvin E. Nipales; Jo-Hannah S. Llames; John Michael Egana; John Q. Wong; Joshua Gregor A. Dizon; Joshua Jose Endozo; Juan Antonio R. Magalang; Karol Sophia Agape R. Padilla; Kenneth M. Kim; Kris P. Punayan; Kristina Patriz Dela Cruz; Lindsay Clare D.L. Carandang; Ma. Exanii Planting; Marc Edsel C. Ayes; Maria Rosario Singh-Vergeire; Maria Sofia L. Yangzon; Marielle M. Gamboa; Marissa Alejandria; Niña Francesca Bustamante; Razel Nikka M. Hao; Renato Jacinto Q. Mantaring; Rianna Patricia S. Cruz; Shiela Mae M. Araza; Yvonne Valerie Austria; Zipporah Mariebelle R. Enriquez; Zyrel V. Mollejon |
| EPI_ISL_5616292                                                                                                                                                                                                                                                                                                                                                                                                                                                                                                                                                                                                             | Balai Kesehatan Masyarakat KlATEN                                                                   | Balai Laboratorium Kesehatan dan Penguian Alat Kesehatan Provinsi Jawa Tengah                                                              | Alia Wijayanti; Dwi Nurseyaasih; Dyah Ayu; Endah Wahyu Y; Ismi Farhati; Purmomo; Sekti Handayani; Wiwik Peni; Yetki Hediningsih                                                                                                                                                                                                                                                                                                                                                                                                                                                                                                                                                                                                                                                                                                                                                                                                                                                                          |
| EPI_ISL_7672030                                                                                                                                                                                                                                                                                                                                                                                                                                                                                                                                                                                                             | Bambino Gesù Pediatric Hospital                                                                     | Microbiology and Immunology Diagnosis Bambino Gesù Pediatric Hospital                                                                      | Carlo Federico Perno; Claudia Alteri; Luna Colagrossi; Rossana Scutari; Valentino Costabile                                                                                                                                                                                                                                                                                                                                                                                                                                                                                                                                                                                                                                                                                                                                                                                                                                                                                                              |
| EPI_ISL_842954, EPI_ISL_949761                                                                                                                                                                                                                                                                                                                                                                                                                                                                                                                                                                                              | Barts Health NHS Trust                                                                              | COVID-19 Genomics UK (COG-UK) Consortium                                                                                                   | BROAD; Beatrix; CUTINO-MOGUEL; Claire; David; Dola; HARRINGTON; KELE; KULASEGARAN-SHYLINI; Maria-Teresa; OWOYEMI; Raghavendran; SHYLINI                                                                                                                                                                                                                                                                                                                                                                                                                                                                                                                                                                                                                                                                                                                                                                                                                                                                  |
| EPI_ISL_5552926                                                                                                                                                                                                                                                                                                                                                                                                                                                                                                                                                                                                             | Bataan General Hospital and Medical Center                                                          | Philippine Genome Center                                                                                                                   | Alethea R. de Guzman; Alyssa Joyce E. Telles; Anna Ong-Lim; Arianne A. Zamora; Benedict A. Maralit; Carlo M. Lapid; Celia Carlos; Cynthia P. Saloma; Devon Ray Pacial; Diomedes A. Cariño; Edsel Maurice Salvaña; El King D. Morado; Elcid Aaron R. Pangilinan; Eva Maria Cutiongco-de la Paz; Francis A. Tablizo; Henrietta Marie Rodriguez; Jaime C. Montoya; Jan Michael C. Yap; Jarvin E. Nipales; Jo-Hannah S. Llames; John Michael Egana; John Q. Wong; Joshua Gregor A. Dizon; Joshua Jose Endozo; Juan Antonio R. Magalang; Karol Sophia Agape R. Padilla; Kris P. Punayan; Kristina Patriz Dela Cruz; Lindsay Clare D.L. Carandang; Ma. Exanii Planting; Marc Edsel C. Ayes; Maria Rosario Singh-Vergeire; Maria Sofia L. Yangzon; Marielle M. Gamboa; Marissa Alejandria; Niña Francesca Bustamante; Razel Nikka M. Hao; Renato Jacinto Q. Mantaring; Rianna Patricia S. Cruz; Shiela Mae M. Araza; Yvonne Valerie Austria; Zipporah Mariebelle R. Enriquez; Zyrel V. Mollejon                 |
| EPI_ISL_8351058, EPI_ISL_8712110, EPI_ISL_8712139                                                                                                                                                                                                                                                                                                                                                                                                                                                                                                                                                                           | Bayerisches Landesamt fuer Gesundheit und Lebensmittelsicherheit (LGL)                              | Bayerisches Landesamt fuer Gesundheit und Lebensmittelsicherheit (LGL)                                                                     | Alexandra Dangel; Andreas Sing; Annika Sprenger; Carola Berger; Laura Weise; Nikolaus Ackermann; Sabrina Hepner                                                                                                                                                                                                                                                                                                                                                                                                                                                                                                                                                                                                                                                                                                                                                                                                                                                                                          |
| EPI_ISL_2111337                                                                                                                                                                                                                                                                                                                                                                                                                                                                                                                                                                                                             | Bayerisches Landesamt für Gesundheit und Lebensmittelsicherheit (LGL)                               | Robert Koch Institute                                                                                                                      |                                                                                                                                                                                                                                                                                                                                                                                                                                                                                                                                                                                                                                                                                                                                                                                                                                                                                                                                                                                                          |
| EPI_ISL_1357136                                                                                                                                                                                                                                                                                                                                                                                                                                                                                                                                                                                                             | Bayerisches Landesamt für Gesundheit und Lebensmittelsicherheit                                     | Robert Koch Institute                                                                                                                      |                                                                                                                                                                                                                                                                                                                                                                                                                                                                                                                                                                                                                                                                                                                                                                                                                                                                                                                                                                                                          |

|                                                                                                                                                                                                                                                                                                                                                                                                                                                                                                                                                                                                                                                                                                                                                                                                                                                                                                                                                                                                                                                                                                                                                                                                                                                                                                                                                                                                                                                                                    |                                                                                                       |                                                                                                                                                                                                                      |                                                                                                                                                                                                                                                                                                                                                                                                                                                                                                                                                                                                                                                                                                                                                                                                                                                                                                                                                                                                                                                                    |
|------------------------------------------------------------------------------------------------------------------------------------------------------------------------------------------------------------------------------------------------------------------------------------------------------------------------------------------------------------------------------------------------------------------------------------------------------------------------------------------------------------------------------------------------------------------------------------------------------------------------------------------------------------------------------------------------------------------------------------------------------------------------------------------------------------------------------------------------------------------------------------------------------------------------------------------------------------------------------------------------------------------------------------------------------------------------------------------------------------------------------------------------------------------------------------------------------------------------------------------------------------------------------------------------------------------------------------------------------------------------------------------------------------------------------------------------------------------------------------|-------------------------------------------------------------------------------------------------------|----------------------------------------------------------------------------------------------------------------------------------------------------------------------------------------------------------------------|--------------------------------------------------------------------------------------------------------------------------------------------------------------------------------------------------------------------------------------------------------------------------------------------------------------------------------------------------------------------------------------------------------------------------------------------------------------------------------------------------------------------------------------------------------------------------------------------------------------------------------------------------------------------------------------------------------------------------------------------------------------------------------------------------------------------------------------------------------------------------------------------------------------------------------------------------------------------------------------------------------------------------------------------------------------------|
| EPI_ISL_5912897<br>EPI_ISL_501169                                                                                                                                                                                                                                                                                                                                                                                                                                                                                                                                                                                                                                                                                                                                                                                                                                                                                                                                                                                                                                                                                                                                                                                                                                                                                                                                                                                                                                                  | (LGL)<br>Baylor College of Medicine                                                                   | Baylor College of Medicine: HGSC                                                                                                                                                                                     | David Henke; Donna Muzny; Erin Nicholson; George Weissenberger; Ginger Metcalf; Harsha Doddapaneni; Hsu Chao; Hua Shen; Joseph F. Petrosino; Kavya Kottapalli; Kristi L. Hoffman; Matthew C. Ross; Matthew Wong; Pedro Piedra; Qingchang Meng; Richard Suckang; Sara J.J. Cregeen; Sejal Salvi; Tulin Ayvaz; Vasanthi Avadhanula; Vipin Menon; Yimmi Meiherguli; Zeineen Momin                                                                                                                                                                                                                                                                                                                                                                                                                                                                                                                                                                                                                                                                                     |
| EPI_ISL_1112979                                                                                                                                                                                                                                                                                                                                                                                                                                                                                                                                                                                                                                                                                                                                                                                                                                                                                                                                                                                                                                                                                                                                                                                                                                                                                                                                                                                                                                                                    | Baylor College of Medicine/ GCID                                                                      | Baylor College of Medicine/ GCID                                                                                                                                                                                     | David Henke; Donna Muzny; Erin Nicholson; George Weissenberger; Ginger Metcalf; Harsha Doddapaneni; Hsu Chao; Hua Shen; Joseph F. Petrosino; Kavya Kottapalli; Kristi L. Hoffman; Matthew C. Ross; Matthew Wong; Pedro Piedra; Qingchang Meng; Richard Suckang; Sara J.J. Cregeen; Sejal Salvi; Tulin Ayvaz; Vasanthi Avadhanula; Vipin Menon; Yimmi Meiherguli; Zeineen Momin                                                                                                                                                                                                                                                                                                                                                                                                                                                                                                                                                                                                                                                                                     |
| EPI_ISL_966310<br>EPI_ISL_1171707, EPI_ISL_1235683, EPI_ISL_1623820, EPI_ISL_1627440, EPI_ISL_1911926, EPI_ISL_1972304, EPI_ISL_2083084, EPI_ISL_2626774, EPI_ISL_2774296, EPI_ISL_2928237, EPI_ISL_2928285, EPI_ISL_3031575, EPI_ISL_3031616, EPI_ISL_3214868, EPI_ISL_3214877, EPI_ISL_3418750                                                                                                                                                                                                                                                                                                                                                                                                                                                                                                                                                                                                                                                                                                                                                                                                                                                                                                                                                                                                                                                                                                                                                                                   | Baylor Scott & White - Temple                                                                         | Baylor Scott & White - Temple                                                                                                                                                                                        | Ari Rao; Kimberley Walker; Linden Morales; Marcus Volz; Shelby Hendrickson                                                                                                                                                                                                                                                                                                                                                                                                                                                                                                                                                                                                                                                                                                                                                                                                                                                                                                                                                                                         |
| see above                                                                                                                                                                                                                                                                                                                                                                                                                                                                                                                                                                                                                                                                                                                                                                                                                                                                                                                                                                                                                                                                                                                                                                                                                                                                                                                                                                                                                                                                          | Baylor Scott & White-Temple                                                                           | Baylor Scott & White-Temple                                                                                                                                                                                          | Ari Rao; Caitlin Maloney; Kimberly Walker; Linden Morales; Marcus Volz; Shelby Hendrickson; Shi Ruo                                                                                                                                                                                                                                                                                                                                                                                                                                                                                                                                                                                                                                                                                                                                                                                                                                                                                                                                                                |
| EPI_ISL_2754940                                                                                                                                                                                                                                                                                                                                                                                                                                                                                                                                                                                                                                                                                                                                                                                                                                                                                                                                                                                                                                                                                                                                                                                                                                                                                                                                                                                                                                                                    | Baylor Scott and White Memorial Hospital                                                              | Genomics and Discovery, Respiratory Viruses Branch, Division of Viral Diseases, Centers for Disease Control and Prevention                                                                                           | Adam Retchless; Anna Kelleher; Anna Uehara; Brian Lynch; Clinton R. Paden; Dhvani Batra; Haibin Wang; Han Jia Justin Ng; Jasmine Padilla; Jing Zhang; Justin Lee; Krista Queen; Kirk Burroughs; Mili Sheth; Morgan Davis; Peter Cook; Rachel Marine; Sarah Nobles; Suxiang Tong; Tara Coalter; Yan Li; Ying Tao                                                                                                                                                                                                                                                                                                                                                                                                                                                                                                                                                                                                                                                                                                                                                    |
| EPI_ISL_8090963                                                                                                                                                                                                                                                                                                                                                                                                                                                                                                                                                                                                                                                                                                                                                                                                                                                                                                                                                                                                                                                                                                                                                                                                                                                                                                                                                                                                                                                                    | Berkeley Medical Center                                                                               | WVU and Marshall University Combined Genomics Core Facilities                                                                                                                                                        | James Denvir; Peter Perrotta; Peter Stoilov; Ryan Percifield; Wesley Kimble                                                                                                                                                                                                                                                                                                                                                                                                                                                                                                                                                                                                                                                                                                                                                                                                                                                                                                                                                                                        |
| EPI_ISL_2913688, EPI_ISL_2916085, EPI_ISL_2917162, EPI_ISL_2917173, EPI_ISL_2918433, EPI_ISL_2995797, EPI_ISL_2999967, EPI_ISL_3069038, EPI_ISL_3108661, EPI_ISL_3123681, EPI_ISL_3171402, EPI_ISL_3174969, EPI_ISL_3202517, EPI_ISL_3249688, EPI_ISL_3250546, EPI_ISL_3285688, EPI_ISL_3336270, EPI_ISL_3378507, EPI_ISL_3436740, EPI_ISL_3436963, EPI_ISL_3439014, EPI_ISL_3441207, EPI_ISL_3698596, EPI_ISL_3702198, EPI_ISL_3705149, EPI_ISL_3885268, EPI_ISL_3964312, EPI_ISL_3966270, EPI_ISL_3993161, EPI_ISL_4247660, EPI_ISL_4264454, EPI_ISL_4326940, EPI_ISL_4349716, EPI_ISL_4477716, EPI_ISL_4500644, EPI_ISL_5133742, EPI_ISL_5138783, EPI_ISL_5140643, EPI_ISL_5140830, EPI_ISL_5270475, EPI_ISL_5271837, EPI_ISL_5273920, EPI_ISL_5334744, EPI_ISL_5471158, EPI_ISL_5528049, EPI_ISL_5785930, EPI_ISL_6006850, EPI_ISL_6114855, EPI_ISL_6261923, EPI_ISL_6620687, EPI_ISL_6670095, EPI_ISL_6759018, EPI_ISL_6868216, EPI_ISL_6820383, EPI_ISL_6868378, EPI_ISL_6919465, EPI_ISL_6921103, EPI_ISL_7144136, EPI_ISL_7157144, EPI_ISL_7157259, EPI_ISL_7392298, EPI_ISL_7392988, EPI_ISL_7395081, EPI_ISL_7758895                                                                                                                                                                                                                                                                                                                                                     | Berkeley and Surrey Pathology Services Lighthouse Laboratory                                          | Wellcome Sanger Institute for the COVID-19 Genomics UK (COG-UK) Consortium                                                                                                                                           | Berkshire and Surrey Pathology Services Lighthouse Laboratory and Alex Alderton; Cordelia Langford; David K. Jackson; Dominic Kwiatkowski; Ewan Harrison; Ian Johnston; Jeffrey Barrett; John Silittleo on behalf of the Wellcome Sanger Institute COVID-19 Surveillance Team; Roberto Amato; Sonia Goncalves                                                                                                                                                                                                                                                                                                                                                                                                                                                                                                                                                                                                                                                                                                                                                      |
| EPI_ISL_5552339                                                                                                                                                                                                                                                                                                                                                                                                                                                                                                                                                                                                                                                                                                                                                                                                                                                                                                                                                                                                                                                                                                                                                                                                                                                                                                                                                                                                                                                                    | Bicol Regional Diagnostic and Reference Laboratory                                                    | Philippine Genome Center                                                                                                                                                                                             | Alethea R. de Guzman; Alyssa Joyce E. Telles; Anna Ong-Lim; Arianne A. Zamora; Benedict A. Maralit; Carlo M. Lapid; Celia Carlos; Cynthia P. Saloma; Devon Ray Pacial; Diomedes A. Cariño; Edsel Maurice Salvana; El King D. Morado; Elcid Aaron R. Pangilinan; Eva Maria Cutiungco-de la Paz; Francis A. Tablizo; Henrietta Marie Rodriguez; Jaime C. Montoya; Jan Michael C. Yap; Jarvin E. Nipales; Jo-Hannah S. Lames; John Michael Egana; John Q. Wong; Joshua Gregor A. Dizon; Joshua Jose Endozo; Juan Antonio R. Magalang; Karol Sophia Agape R. Padilla; Kris P. Punayan; Kristina Patriz Dela Cruz; Lindsay Clare D.L. Carandang; Ma. Exanil Planting; Marc Edsel C. Ayes; Maria Rosario Singh-Vergeire; Maria Sofia L. Yangzon; Marielle M. Gamboa; Marissa Alejandria; Niña Francesca Bustamante; Razel Nikka M. Hao; Renato Jacinto Q. Mantaring; Rianna Patricia S. Cruz; Shiela Mae M. Araiza; Yvonne Valerie Austria; Zipporah Mariebelle R. Enriquez; Zryel V. Mollejon                                                                           |
| EPI_ISL_5051904<br>EPI_ISL_8978980                                                                                                                                                                                                                                                                                                                                                                                                                                                                                                                                                                                                                                                                                                                                                                                                                                                                                                                                                                                                                                                                                                                                                                                                                                                                                                                                                                                                                                                 | Bintulu Hospital PCR Lab, Bintulu                                                                     | Institute of Health and Community Medicine                                                                                                                                                                           | Chan Chia Jui; Chua Hock Hin; David Perera; Ooi Mong How; Tan Lee See; Tonnii Sia Loong Loong; Wong Jyn Shan                                                                                                                                                                                                                                                                                                                                                                                                                                                                                                                                                                                                                                                                                                                                                                                                                                                                                                                                                       |
| EPI_ISL_955259<br>EPI_ISL_3946251                                                                                                                                                                                                                                                                                                                                                                                                                                                                                                                                                                                                                                                                                                                                                                                                                                                                                                                                                                                                                                                                                                                                                                                                                                                                                                                                                                                                                                                  | BioReference Lab<br>Bioanalytica SA                                                                   | Los Angeles County Public Health Laboratories<br>NJ Public Health and Environmental Laboratories                                                                                                                     | A.R. Gener et al.<br>Byeong Jeong; Dana Woell; Lindsey Bodnar; Shiv Verma                                                                                                                                                                                                                                                                                                                                                                                                                                                                                                                                                                                                                                                                                                                                                                                                                                                                                                                                                                                          |
| EPI_ISL_2151900,<br>EPI_ISL_2333728,<br>EPI_ISL_2334053                                                                                                                                                                                                                                                                                                                                                                                                                                                                                                                                                                                                                                                                                                                                                                                                                                                                                                                                                                                                                                                                                                                                                                                                                                                                                                                                                                                                                            | Biogroup Bio Lam-LCD Saint-Denis                                                                      | Department of Virology, Henri Mondor University Hospital, Assistance Publique Hôpitaux de Paris, Université Paris-Est Créteil, INSERM U955                                                                           | Geraldine Jost; Katia Jatou; Nadia Liassine; Tanguy ARAUD                                                                                                                                                                                                                                                                                                                                                                                                                                                                                                                                                                                                                                                                                                                                                                                                                                                                                                                                                                                                          |
| EPI_ISL_817085,<br>EPI_ISL_1054750                                                                                                                                                                                                                                                                                                                                                                                                                                                                                                                                                                                                                                                                                                                                                                                                                                                                                                                                                                                                                                                                                                                                                                                                                                                                                                                                                                                                                                                 | Bioinformatics and Biostatistics Lab, Advanced Sequencing Facility                                    | COVID-19 Genomics UK (COG-UK) Consortium                                                                                                                                                                             | Alexandre Soulier; Christophe Rodriguez; Elisabeth Trawinski; Guillaume Gricourt; Jean-Michel Pawlowsky; Melissa N'Debi; Slim Fourati; Vanessa Demontant                                                                                                                                                                                                                                                                                                                                                                                                                                                                                                                                                                                                                                                                                                                                                                                                                                                                                                           |
| EPI_ISL_6268703<br>EPI_ISL_8540945                                                                                                                                                                                                                                                                                                                                                                                                                                                                                                                                                                                                                                                                                                                                                                                                                                                                                                                                                                                                                                                                                                                                                                                                                                                                                                                                                                                                                                                 | Biolab Diagnostic Laboratories<br>Biological Threats Identification and Countermeasure Centre         | Biolab Diagnostic Laboratories<br>Biological Threats Identification and Countermeasure Centre                                                                                                                        | Aengus Stewart; Chelsea Sawyer; Harshil Patel; Jerome Nicod; Laura Cubitt; Margaret Crawford<br>Ahmad Tibi; Amid Abdelnour; Badia Sadeddin; Eiad Atwa; Issa Abu-Dayyeh; Lama Hussein; Shaima Ali Lepionka Tomasz; Skuza Katarzyna                                                                                                                                                                                                                                                                                                                                                                                                                                                                                                                                                                                                                                                                                                                                                                                                                                  |
| EPI_ISL_1420708                                                                                                                                                                                                                                                                                                                                                                                                                                                                                                                                                                                                                                                                                                                                                                                                                                                                                                                                                                                                                                                                                                                                                                                                                                                                                                                                                                                                                                                                    | Biomedical Research Foundation of the Academy of Athens (BRFAA)                                       | Greek Genome Center, Biomedical Research Foundation of the Academy of Athens (BRFAA)                                                                                                                                 | Dimitrios Thanos; Emmanouil Athanasiadis; Ioannis Vatsellas; Katerina Zoi; Theodoros Loupis                                                                                                                                                                                                                                                                                                                                                                                                                                                                                                                                                                                                                                                                                                                                                                                                                                                                                                                                                                        |
| EPI_ISL_3334345,<br>EPI_ISL_5392716,<br>EPI_ISL_5392786,<br>EPI_ISL_6185703                                                                                                                                                                                                                                                                                                                                                                                                                                                                                                                                                                                                                                                                                                                                                                                                                                                                                                                                                                                                                                                                                                                                                                                                                                                                                                                                                                                                        | BioneXt Lab                                                                                           | Laboratoire national de sante, Microbiology, Microbial Genomics Platform                                                                                                                                             | Anke Wienecke-Baldacchino; Catherine Ragimbeau; Elodie Solarino; Fatu Djabi; Jessica Tapp; Lise Pignon; Raoul Salmon; Tamir Abdelrahman; Thibault Ferrandon; Virginie Jover                                                                                                                                                                                                                                                                                                                                                                                                                                                                                                                                                                                                                                                                                                                                                                                                                                                                                        |
| EPI_ISL_1143261, EPI_ISL_1353881, EPI_ISL_1569087, EPI_ISL_1721428, EPI_ISL_1721977, EPI_ISL_2121520, EPI_ISL_2265621, EPI_ISL_2313863, EPI_ISL_2956611, EPI_ISL_4042167, EPI_ISL_5400039, EPI_ISL_5912031, EPI_ISL_5912545, EPI_ISL_6955664, EPI_ISL_7087480, EPI_ISL_7115639, EPI_ISL_7418001, EPI_ISL_7431870, EPI_ISL_7750590, EPI_ISL_7769293, EPI_ISL_8222936, EPI_ISL_8245663, EPI_ISL_8666186, EPI_ISL_8678873                                                                                                                                                                                                                                                                                                                                                                                                                                                                                                                                                                                                                                                                                                                                                                                                                                                                                                                                                                                                                                                             | Bioscientia Labor Wermsdorf<br>Bioscientia MVZ Labor Karlsruhe GmbH                                   | Robert Koch Institute<br>Robert Koch Institute                                                                                                                                                                       |                                                                                                                                                                                                                                                                                                                                                                                                                                                                                                                                                                                                                                                                                                                                                                                                                                                                                                                                                                                                                                                                    |
| EPI_ISL_6583486                                                                                                                                                                                                                                                                                                                                                                                                                                                                                                                                                                                                                                                                                                                                                                                                                                                                                                                                                                                                                                                                                                                                                                                                                                                                                                                                                                                                                                                                    | Bluewater Diagnostic Laboratory, LLC                                                                  | University of Louisville Sequencing Technology Center                                                                                                                                                                | Alonzo Shephard; Ryan Neupane; Elizabeth Hudson; Eric C. Rouchka; Erik Korte; Julia H. Chariker; Melissa L. Smith; William Lauer                                                                                                                                                                                                                                                                                                                                                                                                                                                                                                                                                                                                                                                                                                                                                                                                                                                                                                                                   |
| EPI_ISL_1298483                                                                                                                                                                                                                                                                                                                                                                                                                                                                                                                                                                                                                                                                                                                                                                                                                                                                                                                                                                                                                                                                                                                                                                                                                                                                                                                                                                                                                                                                    | Bogorodchany CRH                                                                                      | The Institute of Molecular Biology and Genetics of NASU                                                                                                                                                              | M.Tukalo et al.                                                                                                                                                                                                                                                                                                                                                                                                                                                                                                                                                                                                                                                                                                                                                                                                                                                                                                                                                                                                                                                    |
| EPI_ISL_3493737                                                                                                                                                                                                                                                                                                                                                                                                                                                                                                                                                                                                                                                                                                                                                                                                                                                                                                                                                                                                                                                                                                                                                                                                                                                                                                                                                                                                                                                                    | Boston University CTL                                                                                 | Boston University/National Emerging Infectious Disease Laboratories                                                                                                                                                  | Catherine Klapperich; Jacquelyn Turcinovic; John H. Connor; Lena Landeverde; Lynn Doucette-Stamm                                                                                                                                                                                                                                                                                                                                                                                                                                                                                                                                                                                                                                                                                                                                                                                                                                                                                                                                                                   |
| EPI_ISL_900695<br>EPI_ISL_903344,<br>EPI_ISL_2886480                                                                                                                                                                                                                                                                                                                                                                                                                                                                                                                                                                                                                                                                                                                                                                                                                                                                                                                                                                                                                                                                                                                                                                                                                                                                                                                                                                                                                               | Bozeman Health Deaconess Hospital<br>Bozeman Health Deaconess Hospital                                | Wiedenhett lab, Montana State University<br>Wiedenhett lab, Montana State University                                                                                                                                 | Anna Nemudraia; Artem Nemudryi; Calvin Cicha; Deann T. Snyder; Diane Bimczok; Helen Lee; Jodi F. Hedges; Joseph Nichols; Karl K. Vanderwood; Mark A. Julia and Blake Wiedenhett; Tanner Wiegand; Aidan McVay; Anna Nemudraia; Artem Nemudryi; Calvin Cicha; Deann T. Snyder; Diane Bimczok; Helen Lee; Jodi F. Hedges; Joseph Nichols; Karl K. Vanderwood; Mark A. Julia and Blake Wiedenhett; Tanner Wiegand; and Blake Wiedenhett                                                                                                                                                                                                                                                                                                                                                                                                                                                                                                                                                                                                                                |
| EPI_ISL_648270                                                                                                                                                                                                                                                                                                                                                                                                                                                                                                                                                                                                                                                                                                                                                                                                                                                                                                                                                                                                                                                                                                                                                                                                                                                                                                                                                                                                                                                                     | Brigham and Women's Hospital                                                                          | Jonathan Li laboratory                                                                                                                                                                                               | Douglas S Kwon; George Eng; Jonathan Z. Li; Manish C. Choudhary; Upasana D. Adhikari                                                                                                                                                                                                                                                                                                                                                                                                                                                                                                                                                                                                                                                                                                                                                                                                                                                                                                                                                                               |
| EPI_ISL_3480013, EPI_ISL_3480870, EPI_ISL_3480886, EPI_ISL_3481316, EPI_ISL_3481705, EPI_ISL_3482464, EPI_ISL_3483591, EPI_ISL_3484719, EPI_ISL_3485692, EPI_ISL_3488312, EPI_ISL_3488860, EPI_ISL_3491199, EPI_ISL_3597758, EPI_ISL_3598021, EPI_ISL_3598441, EPI_ISL_3599652, EPI_ISL_3601551, EPI_ISL_3601809, EPI_ISL_3602931, EPI_ISL_4227720, EPI_ISL_4222246, EPI_ISL_4423319, EPI_ISL_4423768, EPI_ISL_4428842, EPI_ISL_4431366, EPI_ISL_4431388, EPI_ISL_4431414, EPI_ISL_4433622, EPI_ISL_4434016, EPI_ISL_4829324, EPI_ISL_4829519, EPI_ISL_4830165, EPI_ISL_4830810, EPI_ISL_4831381, EPI_ISL_4832306, EPI_ISL_4832444, EPI_ISL_4832784, EPI_ISL_4842518, EPI_ISL_4843978, EPI_ISL_5215881, EPI_ISL_5215961, EPI_ISL_5223200, EPI_ISL_5225725, EPI_ISL_5228455, EPI_ISL_5682325, EPI_ISL_5684070, EPI_ISL_5684501, EPI_ISL_5684709, EPI_ISL_5685414, EPI_ISL_6734537, EPI_ISL_6739715, EPI_ISL_6739958, EPI_ISL_6741085, EPI_ISL_6741480, EPI_ISL_6741492, EPI_ISL_6741838, EPI_ISL_6750042, EPI_ISL_6753546, EPI_ISL_6754401, EPI_ISL_6996329, EPI_ISL_6996998, EPI_ISL_6998442, EPI_ISL_7003686, EPI_ISL_7003732, EPI_ISL_7006653, EPI_ISL_7007006, EPI_ISL_7314673, EPI_ISL_7319917, EPI_ISL_7319965, EPI_ISL_7739898, EPI_ISL_8368495, EPI_ISL_8369809, EPI_ISL_8370434, EPI_ISL_8430134, EPI_ISL_8430363, EPI_ISL_8794346, EPI_ISL_8794417, EPI_ISL_8906753, EPI_ISL_8906767                                                                                      | CCDC Public Health Laboratory                                                                         | Ana Pacagnella; Corrinne Ng; Dan Fornika; James Zlosnik; John Tyson; Kim Macdonald; Kimia Kameliani; Linda Hoang; Loretta Janz; Mel Kraiden; Natalie Prystajczyk; Prystajczyk Natalie; Robert Azana; Shannon Russell |                                                                                                                                                                                                                                                                                                                                                                                                                                                                                                                                                                                                                                                                                                                                                                                                                                                                                                                                                                                                                                                                    |
| EPI_ISL_1578438, EPI_ISL_1786819, EPI_ISL_1918901, EPI_ISL_1919116, EPI_ISL_2096590, EPI_ISL_2096647, EPI_ISL_3723882, EPI_ISL_3938005, EPI_ISL_3945844, EPI_ISL_4094236, EPI_ISL_4095082, EPI_ISL_4095366, EPI_ISL_4304511, EPI_ISL_4454366, EPI_ISL_4516251, EPI_ISL_4517188, EPI_ISL_4627060, EPI_ISL_4627193, EPI_ISL_4729311, EPI_ISL_4970758, EPI_ISL_4971071, EPI_ISL_4972495, EPI_ISL_5008656, EPI_ISL_5143698, EPI_ISL_5144254, EPI_ISL_5251817, EPI_ISL_5252689, EPI_ISL_5252750, EPI_ISL_5455727, EPI_ISL_5744684, EPI_ISL_5745370, EPI_ISL_5745446, EPI_ISL_6034815, EPI_ISL_6209274, EPI_ISL_6209660, EPI_ISL_6210494, EPI_ISL_6210598, EPI_ISL_6307559, EPI_ISL_6603180, EPI_ISL_6603188, EPI_ISL_6603265, EPI_ISL_6800254, EPI_ISL_6829252, EPI_ISL_7339675, EPI_ISL_7389127, EPI_ISL_7544755, EPI_ISL_7569343, EPI_ISL_7774955, EPI_ISL_7810051, EPI_ISL_7831603, EPI_ISL_7831631, EPI_ISL_7831788, EPI_ISL_7981148, EPI_ISL_8215449                                                                                                                                                                                                                                                                                                                                                                                                                                                                                                                               | British Columbia Centre For Disease Control                                                           | BCDC Public Health Laboratory                                                                                                                                                                                        | Ana Pacagnella; Corrinne Ng; Dan Fornika; James Zlosnik; John Tyson; Kim Macdonald; Kimia Kameliani; Linda Hoang; Loretta Janz; Mel Kraiden; Natalie Prystajczyk; Prystajczyk Natalie; Robert Azana; Shannon Russell                                                                                                                                                                                                                                                                                                                                                                                                                                                                                                                                                                                                                                                                                                                                                                                                                                               |
| see above                                                                                                                                                                                                                                                                                                                                                                                                                                                                                                                                                                                                                                                                                                                                                                                                                                                                                                                                                                                                                                                                                                                                                                                                                                                                                                                                                                                                                                                                          | Broad Institute Clinical Research Sequencing Platform                                                 | Infectious Disease Program, Broad Institute of Harvard and MIT                                                                                                                                                       | Adams, G.; B.L.; B.W.; Bauer, M.; Birren; Blumenstiel, B.; Brown, C.; Carter, A.; Chaluvaldi, S.; D.J.; DeFelle, M.; DeRuff, K.; Dodge, S.; Gabriel, S.; Gallagher, G.; Gladden-Young, A.; Granger, B.; J.E.; K.J.; Lagerborg, K.; Larkin, K.; Lee, M.; Lemieux; Lennon, N.; Loreth, C.; Madoff, L.; McGovern, S.; Meldrum, J.; Normandin, E. P.C.; Park; Pearlman, L.; Reilly, S.; Rudy, M.; Sabeti; Siddle; Smole, S.; Tomkins-Tinch, C.; Vicente, G.; and MacInnis                                                                                                                                                                                                                                                                                                                                                                                                                                                                                                                                                                                              |
| EPI_ISL_5541446                                                                                                                                                                                                                                                                                                                                                                                                                                                                                                                                                                                                                                                                                                                                                                                                                                                                                                                                                                                                                                                                                                                                                                                                                                                                                                                                                                                                                                                                    | Bulacan Medical Center                                                                                | Philippine Genome Center                                                                                                                                                                                             | Alethea R. de Guzman; Anna Ong-Lim; Arianne A. Zamora; Benedict A. Maralit; Carlo M. Lapid; Celia Carlos; Cynthia P. Saloma; Devon Ray Pacial; Diomedes A. Cariño; Edsel Maurice Salvana; El King D. Morado; Elcid Aaron R. Pangilinan; Eva Maria Cutiungco-de la Paz; Francis A. Tablizo; Henrietta Marie Rodriguez; Jaime C. Montoya; Jan Michael C. Yap; Jarvin E. Nipales; Jo-Hannah S. Lames; John Q. Wong; Joshua Gregor A. Dizon; Juan Antonio R. Magalang; Karol Sophia Agape R. Padilla; Kenneth M. Kim; Kris P. Punayan; Kristina Patriz Dela Cruz; Lindsay Clare D.L. Carandang; Ma. Exanil Planting; Marc Edsel C. Ayes; Maria Rosario Singh-Vergeire; Maria Sofia L. Yangzon; Marielle M. Gamboa; Marissa Alejandria; Niña Francesca Bustamante; Razel Nikka M. Hao; Renato Jacinto Q. Mantaring; Rianna Patricia S. Cruz; Shiela Mae M. Araiza; Yvonne Valerie Austria; Zipporah Mariebelle R. Enriquez; Zryel V. Mollejon                                                                                                                           |
| EPI_ISL_732543<br>EPI_ISL_4716774                                                                                                                                                                                                                                                                                                                                                                                                                                                                                                                                                                                                                                                                                                                                                                                                                                                                                                                                                                                                                                                                                                                                                                                                                                                                                                                                                                                                                                                  | Bundeswehr Institute of Microbiology<br>Butuan Medical Center                                         | Bundeswehr Institute of Microbiology<br>Philippine Genome Center                                                                                                                                                     | Alexandra Rehn; Enrico Georgi; Malena Bestehorn-Willmann; Markus Antwerpen; Mathias Walter; Roman Wölfel; Sabine Zange<br>Alethea R. de Guzman; Anna Ong-Lim; Arianne A. Zamora; Benedict A. Maralit; Carlo M. Lapid; Celia Carlos; Cynthia P. Saloma; Devon Ray Pacial; Diomedes A. Cariño; Edsel Maurice Salvana; El King D. Morado; Elcid Aaron R. Pangilinan; Eva Maria Cutiungco-de la Paz; Francis A. Tablizo; Henrietta Marie Rodriguez; Jaime C. Montoya; Jan Michael C. Yap; Jarvin E. Nipales; Jo-Hannah S. Lames; John Q. Wong; Joshua Gregor A. Dizon; Juan Antonio R. Magalang; Karol Sophia Agape R. Padilla; Kenneth M. Kim; Kris P. Punayan; Kristina Patriz Dela Cruz; Lindsay Clare D.L. Carandang; Ma. Exanil Planting; Marc Edsel C. Ayes; Maria Rosario Singh-Vergeire; Maria Sofia L. Yangzon; Marielle M. Gamboa; Marissa Alejandria; Niña Francesca Bustamante; Razel Nikka M. Hao; Renato Jacinto Q. Mantaring; Rianna Patricia S. Cruz; Shiela Mae M. Araiza; Yvonne Valerie Austria; Zipporah Mariebelle R. Enriquez; Zryel V. Mollejon |
| EPI_ISL_4201464                                                                                                                                                                                                                                                                                                                                                                                                                                                                                                                                                                                                                                                                                                                                                                                                                                                                                                                                                                                                                                                                                                                                                                                                                                                                                                                                                                                                                                                                    | CA-Los Angeles County Public Health Laboratory                                                        | Centers for Disease Control and Prevention Division of Viral Diseases, Pathogen Discovery                                                                                                                            | Alex Burgin; Ben Rambo-Martin; Clinton Paden; Dakota Howard; Dave Wentworth; Dhvani Batra; Jasmine Padilla; Justin Lee; Krista Queen; Kristine Lacek; Mark Burroughs; Matthew Schmerer; Meghan Bentz; Mili Sheth; Peter Cook; Sam Shepard; Sarah Nobles; Suxiang Tong; Vivien Dugan; Yvette Unaruhrin                                                                                                                                                                                                                                                                                                                                                                                                                                                                                                                                                                                                                                                                                                                                                              |
| EPI_ISL_2362073<br>EPI_ISL_1761197                                                                                                                                                                                                                                                                                                                                                                                                                                                                                                                                                                                                                                                                                                                                                                                                                                                                                                                                                                                                                                                                                                                                                                                                                                                                                                                                                                                                                                                 | CAP LES BASES<br>CAP MANLLEU                                                                          | Banc de Sang i Teixits<br>Banc de Sang i Teixits                                                                                                                                                                     | Carlos Hobeich; Francisco Vidal; Irene Corrales; Lorena Ramirez; Maria Glòria Soria; Natàlia Comes; Nina Borràs; Noemí Gonzalez; Silvia Sauleada<br>Carlos Hobeich; Francisco Vidal; Irene Corrales; Lorena Ramirez; Maria Glòria Soria; Natàlia Comes; Nina Borràs; Noemí Gonzalez; Silvia Sauleada                                                                                                                                                                                                                                                                                                                                                                                                                                                                                                                                                                                                                                                                                                                                                               |
| EPI_ISL_2782406, EPI_ISL_2782708, EPI_ISL_2782893, EPI_ISL_2783060, EPI_ISL_2797569, EPI_ISL_2797590, EPI_ISL_2825979, EPI_ISL_2855438, EPI_ISL_2858374, EPI_ISL_2890919, EPI_ISL_2892181, EPI_ISL_2892222, EPI_ISL_2921771, EPI_ISL_2921774, EPI_ISL_2923312, EPI_ISL_2923645, EPI_ISL_2923701, EPI_ISL_2976998, EPI_ISL_2977864, EPI_ISL_2978094, EPI_ISL_3119238, EPI_ISL_3244326, EPI_ISL_3302103, EPI_ISL_3304745, EPI_ISL_3304885, EPI_ISL_3332654, EPI_ISL_4508781, EPI_ISL_4509703, EPI_ISL_4532851, EPI_ISL_4570178, EPI_ISL_4661878, EPI_ISL_4706239, EPI_ISL_4958648, EPI_ISL_5013694, EPI_ISL_5015977, EPI_ISL_5153612, EPI_ISL_5153616, EPI_ISL_5153619, EPI_ISL_5153597, EPI_ISL_5198662, EPI_ISL_5436808, EPI_ISL_5443104, EPI_ISL_5443440, EPI_ISL_5461294, EPI_ISL_5461343, EPI_ISL_5636655, EPI_ISL_5695825, EPI_ISL_5870362, EPI_ISL_5870838, EPI_ISL_6011074, EPI_ISL_6159771, EPI_ISL_6211807, EPI_ISL_6265548, EPI_ISL_6266602, EPI_ISL_6334345, EPI_ISL_6909552, EPI_ISL_6947545, EPI_ISL_6948132, EPI_ISL_7131648, EPI_ISL_7580839, EPI_ISL_7582953, EPI_ISL_7673331, EPI_ISL_7673805, EPI_ISL_7708579, EPI_ISL_7813679, EPI_ISL_7855436, EPI_ISL_7856449, EPI_ISL_7858028, EPI_ISL_7858493, EPI_ISL_7859065, EPI_ISL_7859469, EPI_ISL_7999090, EPI_ISL_8147870, EPI_ISL_8188124, EPI_ISL_8398558, EPI_ISL_8399428, EPI_ISL_8399642, EPI_ISL_8400486, EPI_ISL_8631360, EPI_ISL_8631366, EPI_ISL_8631367, EPI_ISL_8634476, EPI_ISL_8729107, EPI_ISL_9393690 | Broad Institute Clinical Research Sequencing Platform                                                 | California Department of Public Health                                                                                                                                                                               | CDPH COVIDNet; CDPH-COVIDNet; CDPH-COVIDNet and UCLA Technology Center for Genomics & Bioinformatics; CDPH-COVIDNet and UCSD EXCITE lab; Emily Smith on behalf of CDPH-COVIDNet; Emily Smith on behalf of CDPH-COVIDNet and Priva Path Labs Inc.; Emily Smith on behalf of CDPH-COVIDNet and UCBI/GI SARS-CoV-2 Sequencing Lab; Emily Smith on behalf of CDPH-COVIDNet and UCLA Technology Center for Genomics & Bioinformatics; Emily Smith on behalf of CDPH-COVIDNet and UCSF Institute for Integrative Genome Biology; Emily Smith on behalf of CDPH-COVIDNet and UCSD EXCITE lab; Emily Smith on behalf of CDPH-COVIDNet and UCSF Center for Advanced Technology; UCLA Technology Center for Genomics & Bioinformatics; UCSD EXCITE lab; UCSF Center for Advanced Technology                                                                                                                                                                                                                                                                                  |
| EPI_ISL_2969010<br>EPI_ISL_4440634,<br>EPI_ISL_6951785                                                                                                                                                                                                                                                                                                                                                                                                                                                                                                                                                                                                                                                                                                                                                                                                                                                                                                                                                                                                                                                                                                                                                                                                                                                                                                                                                                                                                             | CDPH Valencia Branch Laboratory<br>CENTOGENE Frankfurt Laboratory; Niederlassung Industriepark Höchst | California Department of Public Health<br>Robert Koch Institute                                                                                                                                                      | CDPH-COVIDNet; Priva Path Labs Inc.                                                                                                                                                                                                                                                                                                                                                                                                                                                                                                                                                                                                                                                                                                                                                                                                                                                                                                                                                                                                                                |

|                                                                                                                                                         |                                                                        |                                                                                                                                            |                                                                                                                                                                                                                                                                                                                                                                                                                                                                                                                                                                   |
|---------------------------------------------------------------------------------------------------------------------------------------------------------|------------------------------------------------------------------------|--------------------------------------------------------------------------------------------------------------------------------------------|-------------------------------------------------------------------------------------------------------------------------------------------------------------------------------------------------------------------------------------------------------------------------------------------------------------------------------------------------------------------------------------------------------------------------------------------------------------------------------------------------------------------------------------------------------------------|
| EPI_ISL_7206229                                                                                                                                         | CENTRE HOSPITALIER BRIVE                                               | CNR Virus des Infections Respiratoires - France SUD                                                                                        | Antonin Bal; Bruno Lina; Bruno Simon; Gregory Destras; Gwendolynne Burfin; Hadrien Regue; Laurence Josset; Martine Valette; Quentin Semanas                                                                                                                                                                                                                                                                                                                                                                                                                       |
| EPI_ISL_6076608                                                                                                                                         | CENTRE HOSPITALIER NIORT                                               | CNR Virus des Infections Respiratoires - France SUD                                                                                        | Antonin Bal; Bruno Lina; Bruno Simon; Gregory Destras; Gwendolynne Burfin; Hadrien Regue; Laurence Josset; Martine Valette; Quentin Semanas                                                                                                                                                                                                                                                                                                                                                                                                                       |
| EPI_ISL_6076386                                                                                                                                         | CENTRE HOSPITALIER POITIERS                                            | CNR Virus des Infections Respiratoires - France SUD                                                                                        | Antonin Bal; Bruno Lina; Bruno Simon; Gregory Destras; Gwendolynne Burfin; Hadrien Regue; Laurence Josset; Martine Valette; Quentin Semanas                                                                                                                                                                                                                                                                                                                                                                                                                       |
| EPI_ISL_5648501                                                                                                                                         | CENTRO DE ATENDIMENTO PARA ENFRENTAMENTO A COVID19 DE APAREC           | Instituto Butantan                                                                                                                         | Antonio Jorge Martins; Claudia Renata dos Santos Barros; David Schlesinger; Debora Botequiu Moretti; Dimas Tadeu Covas; Elaine Cristina Marqueze; Elaine Vieira Santos; Evandra Strazza Rodrigues; Heidge Fukumasu; Jayme Augusto de Souza-Neto; José Salvatore Leister Patané; Luiz Alcantara; Luiz Lehmann Coutinho; Maria Carolina Elias; Maurício Lacerda Nogueira; Rafael dos Santos Bezerra; Raul Machado Neto; Rejane Maria Tommasini Grotto; Ricardo Haddad; Sandra Coccuzzo Sampaio Vessoni; Simone Kashima; Svetoslav Nanev Slavov; Vincent Louis Viala |
| EPI_ISL_2473744                                                                                                                                         | CENTRO DE SAUDE DE PIRAJUI                                             | Instituto Butantan                                                                                                                         | Antonio Jorge Martins; Claudia Renata dos Santos Barros; David Schlesinger; Debora Botequiu Moretti; Dimas Tadeu Covas; Elaine Cristina Marqueze; Elaine Vieira Santos; Evandra Strazza Rodrigues; Heidge Fukumasu; Jayme Augusto de Souza-Neto; José Salvatore Leister Patané; Luiz Alcantara; Luiz Lehmann Coutinho; Maria Carolina Elias; Maurício Lacerda Nogueira; Rafael dos Santos Bezerra; Raul Machado Neto; Rejane Maria Tommasini Grotto; Ricardo Haddad; Sandra Coccuzzo Sampaio Vessoni; Simone Kashima; Svetoslav Nanev Slavov; Vincent Louis Viala |
| EPI_ISL_5646681                                                                                                                                         | CENTRO DE SAUDE II DR JOSE PAIONE MOCOCA                               | Instituto Butantan                                                                                                                         | Antonio Jorge Martins; Claudia Renata dos Santos Barros; David Schlesinger; Debora Botequiu Moretti; Dimas Tadeu Covas; Elaine Cristina Marqueze; Elaine Vieira Santos; Evandra Strazza Rodrigues; Heidge Fukumasu; Jayme Augusto de Souza-Neto; José Salvatore Leister Patané; Luiz Alcantara; Luiz Lehmann Coutinho; Maria Carolina Elias; Maurício Lacerda Nogueira; Rafael dos Santos Bezerra; Raul Machado Neto; Rejane Maria Tommasini Grotto; Ricardo Haddad; Sandra Coccuzzo Sampaio Vessoni; Simone Kashima; Svetoslav Nanev Slavov; Vincent Louis Viala |
| EPI_ISL_2344566                                                                                                                                         | CENTRO DE SAUDE III AFFONSO LUZZI SANTA CRUZ DAS PALMEIRAS             | Instituto Butantan / FZEA-USP-Prissununga                                                                                                  | Antonio Jorge Martins; Claudia Renata dos Santos Barros; David Schlesinger; Debora Botequiu Moretti; Dimas Tadeu Covas; Elaine Cristina Marqueze; Elaine Vieira Santos; Evandra Strazza Rodrigues; Heidge Fukumasu; Jayme Augusto de Souza-Neto; José Salvatore Leister Patané; Luiz Alcantara; Luiz Lehmann Coutinho; Maria Carolina Elias; Maurício Lacerda Nogueira; Rafael dos Santos Bezerra; Raul Machado Neto; Rejane Maria Tommasini Grotto; Ricardo Haddad; Sandra Coccuzzo Sampaio Vessoni; Simone Kashima; Svetoslav Nanev Slavov; Vincent Louis Viala |
| EPI_ISL_2893943                                                                                                                                         | CERBALLIANCE LA REUNION                                                | CNR Virus des Infections Respiratoires - France SUD                                                                                        | Antonin Bal; Bruno Lina; Gregory Destras; Gwendolynne Burfin; Hadrien Regue; Laurence Josset; Martine Valette; Quentin Semanas                                                                                                                                                                                                                                                                                                                                                                                                                                    |
| EPI_ISL_1628722,<br>EPI_ISL_9370488,<br>EPI_ISL_9371656                                                                                                 | CERBALLIANCE                                                           | UMR PIMIT                                                                                                                                  | Dr Camille Lebarbenchon; Dr David A Wilkinson; Dr Jonathan Turpin; Dr Patrick Mavingui; Magali Turpin; Marie-Alice Simbi                                                                                                                                                                                                                                                                                                                                                                                                                                          |
| EPI_ISL_7743769                                                                                                                                         | CERBALLIANCE CENTRE VAL DE LOIRE                                       | CERBA HealthCare                                                                                                                           | Bénédictite Roquebert; Laura Verdurme; Sabine Trombert; Stéphanie Haim-Boukobza                                                                                                                                                                                                                                                                                                                                                                                                                                                                                   |
| EPI_ISL_6261804                                                                                                                                         | CERBALLIANCE PARIS ET IDF EST SITE BUSSY                               | CERBA HealthCare                                                                                                                           | Bénédictite Roquebert; Laura Verdurme; Sabine Trombert; Stéphanie Haim-Boukobza                                                                                                                                                                                                                                                                                                                                                                                                                                                                                   |
| EPI_ISL_5655436                                                                                                                                         | CH BOULOGNE-SUR-MER                                                    | CHU Lille - Laboratoire de Virologie                                                                                                       | AIT YAHYA Emilie; ALIDJINOU Enagnon Kazali; BOCKET Laurence; CREPIN Michel; DEMAY Christophe; ENGELMANN Ilka; GEFFROY Sandrine; GUIGON Aurélie; LAMBERT Valérie; LAZREK Mouna; NOBILLIAUX Florian; PREVOST Brigitte; THUILLIER Caroline; TINEZ Claire                                                                                                                                                                                                                                                                                                             |
| EPI_ISL_2339273                                                                                                                                         | CH DOUAI                                                               | CHU Lille - Laboratoire de Virologie                                                                                                       | AIT YAHYA Emilie; ALIDJINOU Enagnon Kazali; BOCKET Laurence; CREPIN Michel; DEMAY Christophe; ENGELMANN Ilka; GEFFROY Sandrine; GUIGON Aurélie; LAMBERT Valérie; LAZREK Mouna; NOBILLIAUX Florian; PREVOST Brigitte; THUILLIER Caroline; TINEZ Claire                                                                                                                                                                                                                                                                                                             |
| EPI_ISL_1013381                                                                                                                                         | CH de Mayotte                                                          | National Reference Center for Viruses of Respiratory Infections, Institut Pasteur, Paris                                                   | Angela Brisebarre; Camille Capel; Combe Patrice; Etienne Simon-Lorière; Marion Barbot; Maud Vanpeene; Méline Bizard; Sylvie Behilli; Sylvie van der Werf; Vincent Enouf                                                                                                                                                                                                                                                                                                                                                                                           |
| EPI_ISL_7289520                                                                                                                                         | CH. CHU DE REIMS                                                       | Department of Virology, Henri Mondor University Hospital, Assistance Publique Hôpitaux de Paris, Université Paris-Est Créteil, INSERM U955 | Alexandre Soulier; Christophe Rodriguez; Elisabeth Trawinski; Guillaume Gricourt; Jean-Michel Pawlotsky; Melissa N'Debi; Slim Fourati; Vanessa Demontant                                                                                                                                                                                                                                                                                                                                                                                                          |
| EPI_ISL_3476952                                                                                                                                         | CH. CLEMENCEAU                                                         | Department of Virology, Henri Mondor University Hospital, Assistance Publique Hôpitaux de Paris, Université Paris-Est Créteil, INSERM U955 | Alexandre Soulier; Christophe Rodriguez; Elisabeth Trawinski; Guillaume Gricourt; Jean-Michel Pawlotsky; Melissa N'Debi; Slim Fourati; Vanessa Demontant                                                                                                                                                                                                                                                                                                                                                                                                          |
| EPI_ISL_1404464                                                                                                                                         | CH.INTERCOMMUNAL DE CRETEIL                                            | Department of Virology, Henri Mondor University Hospital, Assistance Publique Hôpitaux de Paris, Université Paris-Est Créteil, INSERM U955 | Alexandre Soulier; Christophe Rodriguez; Elisabeth Trawinski; Guillaume Gricourt; Jean-Michel Pawlotsky; Melissa N'Debi; Slim Fourati; Vanessa Demontant                                                                                                                                                                                                                                                                                                                                                                                                          |
| EPI_ISL_3476646                                                                                                                                         | CH.LE RAINCY_MONTFERMEIL                                               | Department of Virology, Henri Mondor University Hospital, Assistance Publique Hôpitaux de Paris, Université Paris-Est Créteil, INSERM U955 | Alexandre Soulier; Christophe Rodriguez; Elisabeth Trawinski; Guillaume Gricourt; Jean-Michel Pawlotsky; Melissa N'Debi; Slim Fourati; Vanessa Demontant                                                                                                                                                                                                                                                                                                                                                                                                          |
| EPI_ISL_1757759                                                                                                                                         | CH.TROYES                                                              | Department of Virology, Henri Mondor University Hospital, Assistance Publique Hôpitaux de Paris, Université Paris-Est Créteil, INSERM U955 | Alexandre Soulier; Christophe Rodriguez; Elisabeth Trawinski; Guillaume Gricourt; Jean-Michel Pawlotsky; Melissa N'Debi; Slim Fourati; Vanessa Demontant                                                                                                                                                                                                                                                                                                                                                                                                          |
| EPI_ISL_1085932                                                                                                                                         | CH.de LONS LE SAUNIER                                                  | Department of Virology, Henri Mondor University Hospital, Assistance Publique Hôpitaux de Paris, Université Paris-Est Créteil, INSERM U955 | Alexandre Soulier; Christophe Rodriguez; Elisabeth Trawinski; Guillaume Gricourt; Jean-Michel Pawlotsky; Melissa N'Debi; Slim Fourati; Vanessa Demontant                                                                                                                                                                                                                                                                                                                                                                                                          |
| EPI_ISL_1265799                                                                                                                                         | CHMS CHAMBERY                                                          | CNR Virus des Infections Respiratoires - France SUD                                                                                        | Antonin Bal; Bruno Lina; Bruno Simon; Gregory Destras; Gwendolynne Burfin; Hadrien Regue; Laurence Josset; Martine Valette; Quentin Semanas                                                                                                                                                                                                                                                                                                                                                                                                                       |
| EPI_ISL_2382684                                                                                                                                         | CHRIS HANI BARAGWANATH LABORATORY                                      | National Institute for Communicable Diseases of the National Health Laboratory Service                                                     | Amoako DG; Bhiman JN; Ismail A; Mahlangu B; Mohale T; Ntuli N; Scheepers C                                                                                                                                                                                                                                                                                                                                                                                                                                                                                        |
| EPI_ISL_7814338                                                                                                                                         | CHRU BREST                                                             | laboratoire de Virologie CHU Brest                                                                                                         | Adissa Tran Minoui; Christopher Payan; Léa Pilorgé; Simon Rambaut; Sophie Vallet                                                                                                                                                                                                                                                                                                                                                                                                                                                                                  |
| EPI_ISL_2637649                                                                                                                                         | CHRU STRASBOURG                                                        | Department of Virology, Henri Mondor University Hospital, Assistance Publique Hôpitaux de Paris, Université Paris-Est Créteil, INSERM U955 | Alexandre Soulier; Christophe Rodriguez; Elisabeth Trawinski; Guillaume Gricourt; Jean-Michel Pawlotsky; Melissa N'Debi; Slim Fourati; Vanessa Demontant                                                                                                                                                                                                                                                                                                                                                                                                          |
| EPI_ISL_1628828,<br>EPI_ISL_1629472                                                                                                                     | CHU                                                                    | UMR PIMIT                                                                                                                                  | Dr Camille Lebarbenchon; Dr David A Wilkinson; Dr Patrick Mavingui; Magali Turpin                                                                                                                                                                                                                                                                                                                                                                                                                                                                                 |
| EPI_ISL_6778955                                                                                                                                         | CHU - Saint-Pierre                                                     | Laboratoire de virologie, CNR arbovirus Associé, Chu de la Réunion                                                                         | Anne-Julie Gourdé; Etienne Frumence; Marie-Christine Jaffar Bandjee; Nicolas M'nemosyme; Nicolas Traversier; Rubens Lhonneur                                                                                                                                                                                                                                                                                                                                                                                                                                      |
| EPI_ISL_3475264                                                                                                                                         | CHU DE DIJON                                                           | Department of Virology, Henri Mondor University Hospital, Assistance Publique Hôpitaux de Paris, Université Paris-Est Créteil, INSERM U955 | Alexandre Soulier; Christophe Rodriguez; Elisabeth Trawinski; Guillaume Gricourt; Jean-Michel Pawlotsky; Melissa N'Debi; Slim Fourati; Vanessa Demontant                                                                                                                                                                                                                                                                                                                                                                                                          |
| EPI_ISL_2367767                                                                                                                                         | CHU LILLE                                                              | CHU Lille - Laboratoire de Virologie                                                                                                       | AIT YAHYA Emilie; ALIDJINOU Enagnon Kazali; BOCKET Laurence; CREPIN Michel; DEMAY Christophe; ENGELMANN Ilka; GEFFROY Sandrine; GUIGON Aurélie; LAMBERT Valérie; LAZREK Mouna; NOBILLIAUX Florian; PREVOST Brigitte; TCHANTCHOU NJOSSÉ YANICK; THUILLIER Caroline; TINEZ Claire                                                                                                                                                                                                                                                                                   |
| EPI_ISL_1920240                                                                                                                                         | CHU Lille                                                              | CHU Lille                                                                                                                                  | AIT YAHYA Emilie; ALIDJINOU Enagnon Kazali; BOCKET Laurence; CREPIN Michel; DEMAY Christophe; ENGELMANN Ilka; GEFFROY Sandrine; GUIGON Aurélie; LAMBERT Valérie; LAZREK Mouna; NOBILLIAUX Florian; PREVOST Brigitte; THUILLIER Caroline; TINEZ Claire                                                                                                                                                                                                                                                                                                             |
| EPI_ISL_1671780                                                                                                                                         | CHU Lille                                                              | CHU Lille - Laboratoire de Virologie                                                                                                       | AIT YAHYA Emilie; ALIDJINOU Enagnon Kazali; BOCKET Laurence; CREPIN Michel; DEMAY Christophe; ENGELMANN Ilka; GEFFROY Sandrine; GUIGON Aurélie; LAMBERT Valérie; LAZREK Mouna; NOBILLIAUX Florian; PREVOST Brigitte; THUILLIER Caroline; TINEZ Claire                                                                                                                                                                                                                                                                                                             |
| EPI_ISL_8551160                                                                                                                                         | CHU NIMES                                                              | CHU NIMES                                                                                                                                  | Agathe Boudet; Milene Sasso; Sophie Bravo; Stephan Robin                                                                                                                                                                                                                                                                                                                                                                                                                                                                                                          |
| EPI_ISL_3064150                                                                                                                                         | CHU Pontchaillou                                                       | CHU Pontchaillou                                                                                                                           | DE TAYRAC Marie; DENOUAL Florent; ETCHEVERRY Amandine; FEBREAU Christine; GALIBERT Marie Dominique; GROLHIER Claire; JAGLINE Steven; PRONIER Charlotte; SASSI Mohamed; THIBAUT Vincent                                                                                                                                                                                                                                                                                                                                                                            |
| EPI_ISL_8006418                                                                                                                                         | CHU Purpan - Laboratoire de Virologie - Institut Fédératif de Biologie | CHU Purpan - Laboratoire de Virologie - Institut Fédératif de Biologie                                                                     | Boyer P.; Carcenac R.; Ferrer V.; Harter A.; Izopet J.; Jeanne N.; Latour J.; Ranger N.; Tremeaux P.                                                                                                                                                                                                                                                                                                                                                                                                                                                              |
| EPI_ISL_3637026,<br>EPI_ISL_5033665                                                                                                                     | CHU Sao Joao, Porto                                                    | Instituto Nacional de Saude (INSA)                                                                                                         | Borges et al                                                                                                                                                                                                                                                                                                                                                                                                                                                                                                                                                      |
| EPI_ISL_663213                                                                                                                                          | CHU de Limoges                                                         | CNR Virus des Infections Respiratoires - France SUD                                                                                        | Antonin Bal; Bruno Lina; Gregory Destras; Gwendolynne Burfin; Hadrien Règue; Laurence Josset; Martine Valette; Quentin Semanas; Sylvie Rogez                                                                                                                                                                                                                                                                                                                                                                                                                      |
| EPI_ISL_2510022,<br>EPI_ISL_8866325                                                                                                                     | CHUGA-IBP-laboratoire de Virologie                                     | IBP-laboratoire de virologie                                                                                                               | Alban Caporossi; Anne Signori -Schmuck; Anne-Karen Faure; Aurélie Truffot; Benjamin Nemoz; Hugo Jardin; Julien Andréani; Julien Lupo; Léa Ponderand; Pascal Poignard; Patrice Morand; Raphaële Germi; Sylvie Larrat                                                                                                                                                                                                                                                                                                                                               |
| EPI_ISL_511067                                                                                                                                          | CHULC - H Curry Cabral                                                 | Instituto Nacional de Saude (INSA)                                                                                                         | Borges et al                                                                                                                                                                                                                                                                                                                                                                                                                                                                                                                                                      |
| EPI_ISL_2102144,<br>EPI_ISL_4413123,<br>EPI_ISL_7139064,<br>EPI_ISL_7139209                                                                             | CHUV                                                                   | Laboratory of genomics and metagenomics                                                                                                    | Claire Bertelli; Damien Jacot; Gilbert Greub; Sébastien Aebly; Trestan Pillionel                                                                                                                                                                                                                                                                                                                                                                                                                                                                                  |
| EPI_ISL_7681827,<br>EPI_ISL_7812338                                                                                                                     | CHUV                                                                   | Laboratory of genomics and metagenomics, Institute of Microbiology, University Hospital Centre and University of Lausanne                  | Claire Bertelli; Damien Jacot; Gilbert Greub; Sébastien Aebly; Trestan Pillionel                                                                                                                                                                                                                                                                                                                                                                                                                                                                                  |
| EPI_ISL_1265871, EPI_ISL_1418242, EPI_ISL_2289586, EPI_ISL_2567376, EPI_ISL_3472849, EPI_ISL_4280675, EPI_ISL_4282306, EPI_ISL_4284356, EPI_ISL_7609167 | see above                                                              | CNR Virus des Infections Respiratoires - France SUD                                                                                        | Antonin Bal; Bruno Lina; Bruno Simon; Gregory Destras; Gwendolynne Burfin; Hadrien Regue; Laurence Josset; Martine Valette; Quentin Semanas                                                                                                                                                                                                                                                                                                                                                                                                                       |
| EPI_ISL_5646709                                                                                                                                         | COORDENADORIA MUNICIPAL DE SAUDE DE IRACEMAPOS                         | Instituto Butantan                                                                                                                         | Antonio Jorge Martins; Claudia Renata dos Santos Barros; David Schlesinger; Debora Botequiu Moretti; Dimas Tadeu Covas; Elaine Cristina Marqueze; Elaine Vieira Santos; Evandra Strazza Rodrigues; Heidge Fukumasu; Jayme Augusto de Souza-Neto; José Salvatore Leister Patané; Luiz Alcantara; Luiz Lehmann Coutinho; Maria Carolina Elias; Maurício Lacerda Nogueira; Rafael dos Santos Bezerra; Raul Machado Neto; Rejane Maria Tommasini Grotto; Ricardo Haddad; Sandra Coccuzzo Sampaio Vessoni; Simone Kashima; Svetoslav Nanev Slavov; Vincent Louis Viala |
| EPI_ISL_412981                                                                                                                                          | CR&WISCO GENERAL HOSPITAL                                              | Hubei Provincial Center for Disease Control and Prevention                                                                                 | Bin Fang; Bo Yang; Bo Yu; Faxian Zhan; Guojun Ye; Jing Li; Junqiang Xu; Kun Cai; Linlin Liu; Xiang Li; Xiao Yu; Xixiang Huo; Yongzhong Jiang.                                                                                                                                                                                                                                                                                                                                                                                                                     |
| EPI_ISL_1838831,<br>EPI_ISL_2441606,<br>EPI_ISL_8421201                                                                                                 | CSIR-Centre for Cellular and Molecular Biology                         | CSIR-Centre for Cellular and Molecular Biology-INSACOG                                                                                     | Amareshwar Vodapalli; Ara Sreenivas; Archana Bharadwaj Siva; B Himasri; Blessy B John; Divya Tej Sowpati; Jandhyala Sai Krishna; Karthik Bharadwaj Tallapaka; Lamuk Zaveri; Malini Nemalkanti; Onkar Kulkarni; Payel Mukherjee; Priya Nurkuthy; Rakesh K Mishra; Sharath Chandra Thota; Shreekanth Verma; Sofia Banu; Sreelekshmi MS; Smedha Avadhanula; Surabhi Srivastava; Tulasi Nagabandi; Valli Nagalakshmi Undamatla; Vidhyadhari Methuku; Viswagithe S L                                                                                                   |
| EPI_ISL_9336298,<br>EPI_ISL_9352427                                                                                                                     | CSIR-NEERI, Nagpur Covid-19 Testing Lab                                | CSIR-NEERI, Nagpur Covid-19 Testing Lab                                                                                                    | Krishna Khairnar et al.                                                                                                                                                                                                                                                                                                                                                                                                                                                                                                                                           |

|                                                                                     |                                                                                                                                                                                                                                                                                                                                                                                                                                                                      |                                                                                                                                                                                              |                                                                                                                                                                                                                                                                                                                                                                                                                                                                                                                                                                                                                                                                                                                                                                                                                                                                                                                                                                  |
|-------------------------------------------------------------------------------------|----------------------------------------------------------------------------------------------------------------------------------------------------------------------------------------------------------------------------------------------------------------------------------------------------------------------------------------------------------------------------------------------------------------------------------------------------------------------|----------------------------------------------------------------------------------------------------------------------------------------------------------------------------------------------|------------------------------------------------------------------------------------------------------------------------------------------------------------------------------------------------------------------------------------------------------------------------------------------------------------------------------------------------------------------------------------------------------------------------------------------------------------------------------------------------------------------------------------------------------------------------------------------------------------------------------------------------------------------------------------------------------------------------------------------------------------------------------------------------------------------------------------------------------------------------------------------------------------------------------------------------------------------|
| EPI_ISL_5643648                                                                     | CSIR-National Environmental Engineering Research Institute                                                                                                                                                                                                                                                                                                                                                                                                           | CSIR-Centre for Cellular and Molecular Biology-INSACOG                                                                                                                                       | Amareshwar Vodapalli; Ara Sreenivas; Archana Bharadwaj Siva; B Himasri; Divya Tej Sowpati; Karthik Bharadwaj Tallapaka; Krishna Khairnar; Lamuk Zaveri; Onkar Kulkarni; Payel Mukherjee; Priya Nurkuthy; Rakesh K Mishra; Shreekant Verma; Sofia Banu; Smedha Avadhanula; Tulasi Nagabandi; Valli Nagalakshmi Undamatla; Vidhyadhari Methuku                                                                                                                                                                                                                                                                                                                                                                                                                                                                                                                                                                                                                     |
| EPI_ISL_2350365, EPI_ISL_2350383                                                    | CSL, Maryland Department of Health                                                                                                                                                                                                                                                                                                                                                                                                                                   | CSL, Maryland Department of Health                                                                                                                                                           | Keller, E.; Washington, Y.                                                                                                                                                                                                                                                                                                                                                                                                                                                                                                                                                                                                                                                                                                                                                                                                                                                                                                                                       |
| EPI_ISL_536237                                                                      | CSSS Haut-Richelieu/Rouville (Hôpital)                                                                                                                                                                                                                                                                                                                                                                                                                               | Laboratoire de santé publique du Québec                                                                                                                                                      | Guillaume Bourque; Ioannis Ragoussis; Jesse Shapiro; Mark Lathrop and Michel Roger on behalf of the CoVSeQ research group; Sandrine Moreira                                                                                                                                                                                                                                                                                                                                                                                                                                                                                                                                                                                                                                                                                                                                                                                                                      |
| EPI_ISL_7260523                                                                     | CT Department of Public Health                                                                                                                                                                                                                                                                                                                                                                                                                                       | CT Department of Public Health                                                                                                                                                               | Claire Pearson; Tu N. Nguyen                                                                                                                                                                                                                                                                                                                                                                                                                                                                                                                                                                                                                                                                                                                                                                                                                                                                                                                                     |
| EPI_ISL_1545642                                                                     | Cabinet Priv                                                                                                                                                                                                                                                                                                                                                                                                                                                         | Institut de Pathologie et Genetique (IPG)                                                                                                                                                    | Jérémie Gras; Pascale Hilbert                                                                                                                                                                                                                                                                                                                                                                                                                                                                                                                                                                                                                                                                                                                                                                                                                                                                                                                                    |
| EPI_ISL_5542083                                                                     | Cagayan Valley Medical Center Molecular Laboratory                                                                                                                                                                                                                                                                                                                                                                                                                   | Philippine Genome Center                                                                                                                                                                     | Alethea R. de Guzman; Anna Ong-Lim; Arianne A. Zamora; Benedict A. Maralit; Carlo M. Lapid; Celia Carlos; Cynthia P. Saloma; Devon Ray Pacial; Diomedes A. Cariño; Edsel Maurice Salvana; El King D. Morado; Elcid Aaron R. Pangilinan; Eva Maria Cutiongco-de la Paz; Francis A. Tablizo; Henrietta Marie Rodriguez; Jaime C. Montoya; Jan Michael C. Yap; Jarvin E. Nipales; Jo-Hannah S. Llamas; John Q. Wong; Joshua Gregor A. Dizon; Juan Antonio R. Magalang; Karol Sophia Agape R. Padilla; Kenneth M. Kim; Kris P. Punayan; Kristina Patriz Dela Cruz; Lindsay Clare D.L. Carandang; Ma. Exanil Plantig; Marc Edsel C. Ayes; Maria Rosario Singh-Vergeire; Maria Sofia L. Yangzon; Marielle M. Gamboa; Marissa Alejandria; Niña Francesca Bustamante; Razel Nikka M. Hao; Renato Jacinto Q. Mantaring; Rianna Patricia S. Cruz; Shiela Mae M. Araiza; Yvonne Valerie Austria; Zipporah Mariebelle R. Enriquez; Zyrel V. Mollejon                         |
| EPI_ISL_4474650                                                                     | California Department of Public Health                                                                                                                                                                                                                                                                                                                                                                                                                               | California Department of Public Health                                                                                                                                                       | CDPH IDLB COVIDNet et al                                                                                                                                                                                                                                                                                                                                                                                                                                                                                                                                                                                                                                                                                                                                                                                                                                                                                                                                         |
| EPI_ISL_2778828, EPI_ISL_3101860                                                    | California Department of Public Health Valencia Branch Laboratory (CDPH VBL)                                                                                                                                                                                                                                                                                                                                                                                         | California Department of Public Health                                                                                                                                                       | CDPH-COVIDNet; UCLA Technology Center for Genomics & Bioinformatics; UCSF Center for Advanced Technology                                                                                                                                                                                                                                                                                                                                                                                                                                                                                                                                                                                                                                                                                                                                                                                                                                                         |
| EPI_ISL_4689634                                                                     | Camden Clark Medical Center                                                                                                                                                                                                                                                                                                                                                                                                                                          | WVU and Marshall University Combined Genomics Core Facilities                                                                                                                                | James Denvir; Peter Perrotta; Peter Stoilov; Ryan Percifield; Wesley Kimble                                                                                                                                                                                                                                                                                                                                                                                                                                                                                                                                                                                                                                                                                                                                                                                                                                                                                      |
| EPI_ISL_3911463, EPI_ISL_3931792, EPI_ISL_3931805                                   | Cantacuzino National Military-Medical Institute, Viral Respiratory Infections Laboratory                                                                                                                                                                                                                                                                                                                                                                             | Cantacuzino Institute Virology                                                                                                                                                               | Carmen Cherciu; Luiza Ustea; Mihaela Lazar; Mihaela Oprea; Nicoleta Paraschiv; Sorin Dinu                                                                                                                                                                                                                                                                                                                                                                                                                                                                                                                                                                                                                                                                                                                                                                                                                                                                        |
| EPI_ISL_5115082, EPI_ISL_5144734, EPI_ISL_5241147, EPI_ISL_6575053                  | Cantacuzino National Military-Medical Institute, Viral Respiratory Infections Laboratory                                                                                                                                                                                                                                                                                                                                                                             | Cantacuzino National Military-Medical Institute, Viral Respiratory Infections Laboratory                                                                                                     | Carmen Cherciu; Luiza Ustea; Mihaela Lazar; Mihaela Oprea; Nicoleta Paraschiv; Sorin Dinu                                                                                                                                                                                                                                                                                                                                                                                                                                                                                                                                                                                                                                                                                                                                                                                                                                                                        |
| EPI_ISL_5587901                                                                     | Caraga Regional Hospital GeneXpert Laboratory                                                                                                                                                                                                                                                                                                                                                                                                                        | Philippine Genome Center                                                                                                                                                                     | Alethea R. de Guzman; Alyssa Joyce E. Telles; Anna Ong-Lim; Arianne A. Zamora; Benedict A. Maralit; Carlo M. Lapid; Celia Carlos; Cynthia P. Saloma; Devon Ray Pacial; Diomedes A. Cariño; Edsel Maurice Salvana; El King D. Morado; Elcid Aaron R. Pangilinan; Eva Maria Cutiongco-de la Paz; Francis A. Tablizo; Henrietta Marie Rodriguez; Jaime C. Montoya; Jan Michael C. Yap; Jarvin E. Nipales; Jo-Hannah S. Llamas; John Michael Egana; John Q. Wong; Joshua Jose Endozo; Juan Antonio R. Magalang; Karol Sophia Agape R. Padilla; Kris P. Punayan; Kristina Patriz Dela Cruz; Lindsay Clare D.L. Carandang; Ma. Exanil Plantig; Marc Edsel C. Ayes; Maria Rosario Singh-Vergeire; Maria Sofia L. Yangzon; Marielle M. Gamboa; Marissa Alejandria; Niña Francesca Bustamante; Razel Nikka M. Hao; Renato Jacinto Q. Mantaring; Rianna Patricia S. Cruz; Shiela Mae M. Araiza; Yvonne Valerie Austria; Zipporah Mariebelle R. Enriquez; Zyrel V. Mollejon |
| EPI_ISL_2497069, EPI_ISL_2497114                                                    | Cayuga Medical Center                                                                                                                                                                                                                                                                                                                                                                                                                                                | Cornell Covid-19 Testing Laboratory                                                                                                                                                          | Brittany Cronk; Diego DieI; Elizabeth Plocharczyk; Leonardo Caserta; Melissa Laverack; Patrick Mitchell; Renee Anderson; Roopa Venugopalan                                                                                                                                                                                                                                                                                                                                                                                                                                                                                                                                                                                                                                                                                                                                                                                                                       |
| EPI_ISL_5540072                                                                     | Cebu TB Reference Laboratory                                                                                                                                                                                                                                                                                                                                                                                                                                         | Philippine Genome Center                                                                                                                                                                     | Alethea R. de Guzman; Anna Ong-Lim; Arianne A. Zamora; Benedict A. Maralit; Carlo M. Lapid; Celia Carlos; Cynthia P. Saloma; Devon Ray Pacial; Diomedes A. Cariño; Edsel Maurice Salvana; El King D. Morado; Elcid Aaron R. Pangilinan; Eva Maria Cutiongco-de la Paz; Francis A. Tablizo; Henrietta Marie Rodriguez; Jaime C. Montoya; Jan Michael C. Yap; Jarvin E. Nipales; Jo-Hannah S. Llamas; John Q. Wong; Joshua Gregor A. Dizon; Juan Antonio R. Magalang; Karol Sophia Agape R. Padilla; Kenneth M. Kim; Kris P. Punayan; Kristina Patriz Dela Cruz; Lindsay Clare D.L. Carandang; Ma. Exanil Plantig; Marc Edsel C. Ayes; Maria Rosario Singh-Vergeire; Maria Sofia L. Yangzon; Marielle M. Gamboa; Marissa Alejandria; Niña Francesca Bustamante; Razel Nikka M. Hao; Renato Jacinto Q. Mantaring; Rianna Patricia S. Cruz; Shiela Mae M. Araiza; Yvonne Valerie Austria; Zipporah Mariebelle R. Enriquez; Zyrel V. Mollejon                         |
| EPI_ISL_475615, EPI_ISL_475619, EPI_ISL_475679, EPI_ISL_475716, EPI_ISL_924664      | Cedars-Sinai Medical Center, Department of Pathology & Laboratory Medicine, Molecular Pathology Laboratory                                                                                                                                                                                                                                                                                                                                                           | Cedars-Sinai Medical Center, Molecular Pathology Laboratory of Department of Pathology & Laboratory Medicine and Genomic Core                                                                | Brian Davis; Eric Vail; Jasmine T Plummer; Jean Lopategui; Jianbo Song; John Paul Govindavari; Jong Taek Kim; Jorge Mario Sincuir Martinez; Stephanie Chen; Wenjuan Zhang                                                                                                                                                                                                                                                                                                                                                                                                                                                                                                                                                                                                                                                                                                                                                                                        |
| EPI_ISL_7507388, EPI_ISL_7508338, EPI_ISL_7509052, EPI_ISL_7509796                  | Cedars-Sinai Medical Center, Molecular Pathology Laboratory of Department of Pathology & Laboratory Medicine and Genomic Core                                                                                                                                                                                                                                                                                                                                        | Cedars-Sinai Medical Center, Molecular Pathology Laboratory of Department of Pathology & Laboratory Medicine and Genomic Core                                                                | Brian Davis; Eric Vail; Jasmine T Plummer; Jorge Mario Sincuir Martinez; Stephanie Chen; Wenjuan Zhang                                                                                                                                                                                                                                                                                                                                                                                                                                                                                                                                                                                                                                                                                                                                                                                                                                                           |
| EPI_ISL_1892074                                                                     | Cell-T                                                                                                                                                                                                                                                                                                                                                                                                                                                               | 1. Academic Center for Pathomorphological and Genetic-Molecular Diagnostics Ltd, Białystok, Poland<br>2. National Institute of Public Health - National Institute of Hygiene, Warsaw, Poland | Anetta Sulewska; Jacek Nikiłński; Janusz Dzięcioł; Joanna Kiśluk; Katarzyna Zacharczuk; Konrad Raczkowski; Magdalena Nowakowska; Małgorzata Sadkowska-Todys; Piotr Karabowicz; Piotr Majewski; Przemysław Biecek. Joanna Reszeć; Radosław Charkiewicz; Tomasz Wolkowicz                                                                                                                                                                                                                                                                                                                                                                                                                                                                                                                                                                                                                                                                                          |
| EPI_ISL_3710306, EPI_ISL_5937134                                                    | Center for Laboratory Medicine                                                                                                                                                                                                                                                                                                                                                                                                                                       | Center for Laboratory Medicine                                                                                                                                                               | Yannick Gerth                                                                                                                                                                                                                                                                                                                                                                                                                                                                                                                                                                                                                                                                                                                                                                                                                                                                                                                                                    |
| EPI_ISL_6760932, EPI_ISL_7718846                                                    | Center for Laboratory Medicine                                                                                                                                                                                                                                                                                                                                                                                                                                       | Center for Laboratory Medicine, ZLMSG                                                                                                                                                        | Yannick Gerth                                                                                                                                                                                                                                                                                                                                                                                                                                                                                                                                                                                                                                                                                                                                                                                                                                                                                                                                                    |
| EPI_ISL_4255169                                                                     | Center of Excellence in Clinical Virology                                                                                                                                                                                                                                                                                                                                                                                                                            | Research Unit of Systems Microbiology                                                                                                                                                        | Amornmas Kongkliang; Jira Chansaenroj; Jirachaya Puenpa; Kamolthip Atsawawanun; Nungruthai Suntronwong; Nutsada Saengdao; Oraphan Mayuramart; Pakkapor Panwijitkul; Pattaraporn Nimsamer; Paththaya Rattanakomol; Ritthideach Yorsaeng; Rujipat Wasitthankasem; Sunchai Payungporn; Suwanna Petto; Vichan Pawun; Vorthon Sawaswong; Yong Poororawan                                                                                                                                                                                                                                                                                                                                                                                                                                                                                                                                                                                                              |
| EPI_ISL_2232396                                                                     | Center of Scientific Excellence for Influenza Viruses (CSEIV), National Research Centre                                                                                                                                                                                                                                                                                                                                                                              | Center of Scientific Excellence for Influenza Viruses (CSEIV), National Research Centre                                                                                                      | Ahmed E Kayed; Ahmed El-Taweel; Ahmed Kandell; Ahmed Mostafa; Ghazi Kayali; Mahmoud Shehata; Mina Kamel; Mohamed Ahmed Ali; Mohamed El Sayes; Mokhtar Goma; Noura M Abo Shama; Omnia Kutkat; Rabeh El-Shesheny; Richard Webby; Sara Mahmoud; Yassmin Moatasm                                                                                                                                                                                                                                                                                                                                                                                                                                                                                                                                                                                                                                                                                                     |
| EPI_ISL_2426882, EPI_ISL_2426925, EPI_ISL_2426942, EPI_ISL_5095390, EPI_ISL_5781949 | Centers for Disease Control and Prevention, Dengue Branch                                                                                                                                                                                                                                                                                                                                                                                                            | Centers for Disease Control and Prevention, Dengue Branch                                                                                                                                    | Betzabel Flores; Gabriela Paz-Bailey; Gilberto A. Santiago; Glenda Gonzalez; Jorge L. Munoz-Jordan; Keyla Charriez                                                                                                                                                                                                                                                                                                                                                                                                                                                                                                                                                                                                                                                                                                                                                                                                                                               |
| EPI_ISL_815381                                                                      | Centogene                                                                                                                                                                                                                                                                                                                                                                                                                                                            | Centogene                                                                                                                                                                                    | Krishna Kumar Kandaswamy; Peter Bauer; Vivi Hve-Trang Lieu                                                                                                                                                                                                                                                                                                                                                                                                                                                                                                                                                                                                                                                                                                                                                                                                                                                                                                       |
| EPI_ISL_2123106                                                                     | Centogene; Dr. Bauer Laboratories GmbH                                                                                                                                                                                                                                                                                                                                                                                                                               | Robert Koch Institute                                                                                                                                                                        |                                                                                                                                                                                                                                                                                                                                                                                                                                                                                                                                                                                                                                                                                                                                                                                                                                                                                                                                                                  |
| EPI_ISL_8494968                                                                     | Central Health Laboratory                                                                                                                                                                                                                                                                                                                                                                                                                                            | Central Health Laboratory                                                                                                                                                                    | Bacorisen A; Bahadour BS; Jannoo N; Manraj SS; Mathur H; Ramuth M; Sonoo J; Sujeewon C; Utheeram j                                                                                                                                                                                                                                                                                                                                                                                                                                                                                                                                                                                                                                                                                                                                                                                                                                                               |
| EPI_ISL_4949049, EPI_ISL_6449604, EPI_ISL_7737905                                   | Central Public Health Laboratory                                                                                                                                                                                                                                                                                                                                                                                                                                     | Microbiological Diagnostic Unit - Public Health Laboratory (MDU-PHL)                                                                                                                         | Horan, K.; Kumbu, J.; N.L.; Palou, T.; Seemann, T.; Sherry; Susapu, M.                                                                                                                                                                                                                                                                                                                                                                                                                                                                                                                                                                                                                                                                                                                                                                                                                                                                                           |
| EPI_ISL_978523, EPI_ISL_3255073, EPI_ISL_3255115, EPI_ISL_8622824                   | Central Public Health Laboratory - LACEN -Bahia, Salvador, Brazil                                                                                                                                                                                                                                                                                                                                                                                                    | Central Public Health Laboratory - LACEN -Bahia, Salvador, Brazil                                                                                                                            | Arabela Leal; Breno Dominguez; Felicidade Pereira; Gabriela Menezes; Jaqueline Gomes; Jessica Araujo; Luciana Oliveira; Luiz Alcantara; Marcela Gómez; Marta Giovanetti; Patrícia Cajado; Stephane Tosta; Vagner Fonseca; Vanessa Nardy                                                                                                                                                                                                                                                                                                                                                                                                                                                                                                                                                                                                                                                                                                                          |
| EPI_ISL_3598652                                                                     | Central Public Health Laboratory, National Public Health Organization                                                                                                                                                                                                                                                                                                                                                                                                | Central Public Health Laboratory, National Public Health Organization                                                                                                                        | A.Katsoulidou et al; G.Spanakos; Kyriaki Tryfinopoulou                                                                                                                                                                                                                                                                                                                                                                                                                                                                                                                                                                                                                                                                                                                                                                                                                                                                                                           |
| EPI_ISL_6781721                                                                     | Centre Hospitalier RIOM                                                                                                                                                                                                                                                                                                                                                                                                                                              | CHU Clermont-Ferrand, service de virologie                                                                                                                                                   | Bisseux Maxime; Combes Patricia; Henquell Cecile; Mirand Audrey                                                                                                                                                                                                                                                                                                                                                                                                                                                                                                                                                                                                                                                                                                                                                                                                                                                                                                  |
| EPI_ISL_1731523                                                                     | Centre Hospitalier Universitaire Clermont-Ferrand                                                                                                                                                                                                                                                                                                                                                                                                                    | CHU Clermont-Ferrand, service de virologie                                                                                                                                                   | Bisseux Maxime; Combes Patricia; Henquell Cécile; Mirand Audrey                                                                                                                                                                                                                                                                                                                                                                                                                                                                                                                                                                                                                                                                                                                                                                                                                                                                                                  |
| EPI_ISL_2803212                                                                     | Centre for Dengue Research and AICBU, Department of Immunology and Molecular Medicine                                                                                                                                                                                                                                                                                                                                                                                | Centre for Dengue Research and AICBU, Department of Immunology and Molecular Medicine                                                                                                        | Chandima Jeevandar; Deshan Madhusanka; Deshni Jayathilaka; Dyanath Ranasinghe; Gathsaurie Neelika Malavige                                                                                                                                                                                                                                                                                                                                                                                                                                                                                                                                                                                                                                                                                                                                                                                                                                                       |
| EPI_ISL_952600, EPI_ISL_1107742                                                     | Centre for Enzyme Innovation, University of Portsmouth / Translational Research Laboratory, Portsmouth Hospitals NHS Trust                                                                                                                                                                                                                                                                                                                                           | COVID-19 Genomics UK (COG-UK) Consortium                                                                                                                                                     | Angela Beckett; Christopher Fearn; Kate Cook; Katie Loveson; Salman Goudarzi; Samuel Robson; Scott Elliott; Sharon Glaysher                                                                                                                                                                                                                                                                                                                                                                                                                                                                                                                                                                                                                                                                                                                                                                                                                                      |
| EPI_ISL_3006179                                                                     | Centre for Enzyme Innovation, University of Portsmouth / Translational Research Laboratory, Portsmouth Hospitals NHS Trust / Hampshire Hospitals NHS Foundation Trust / Bournemouth University / University Hospitals Dorset NHS Foundation Trust / Brighton and Sussex University Hospitals NHS Trust / Dartford and Gravesham NHS Trust / Isle of Wight NHS Trust / Maidstone and Tunbridge Wells NHS Trust / University Hospital Southampton NHS Foundation Trust | COVID-19 Genomics UK (COG-UK) Consortium                                                                                                                                                     | Adhyana Mahanama; Allyson Lloyd; Andrew Butt; Angela Beckett; Anibolina Castigador; Anna Mantzouratou; Anoop Chauhan; Ben Macklin; Benjamin Cogger; Buddhini Samaraweera; Cassandra Malone; Christopher Fearn; Claire Thomas; Dorian Crudgington; Eleri Wilson-Davies; Emanuela Pelosi; Emily Macnaughton; Helen Umpleby; Helen Wheeler; Jacqui Prieto; Jonnie Seymour; Karen Withell; Kate Cook; Katie Loveson; Kelly Bicknell; Kevin Tucker; Kordo Saeed; Liz Sheridan; Magdalena Barrow; Matthew Harvey; Mohammed Hassan-Ibrahim; Nathan Moore; Nick Cortes; Rachael Jeremiah; Robert Impey; Salman Goudarzi; Samirakhon Raupova; Samuel Robson; Sarah Buchan; Sarah Jeremiah; Sarah Wyllie; Scott Elliott; Sharon Glaysher; Siona Siliveri; Stephen Aplin; Stephen Kidd; Thea Sass                                                                                                                                                                           |
| EPI_ISL_3835139                                                                     | Centre for Infectious Diseases, CSIR-NEIST                                                                                                                                                                                                                                                                                                                                                                                                                           | Centre for Infectious Diseases, CSIR-NEIST                                                                                                                                                   | G Narahari Sastry; Gayatri Gogoi; Jatin Kalita; Moirangthem G Singh; Munmi Bora; Pankaj Bharali; Prasenjit Manna; Romi Wahengbam; Tridip Phukan; Yasmin B Tapadhar                                                                                                                                                                                                                                                                                                                                                                                                                                                                                                                                                                                                                                                                                                                                                                                               |
| EPI_ISL_5801323                                                                     | Centro De Saude De Avai                                                                                                                                                                                                                                                                                                                                                                                                                                              | Instituto Butantan                                                                                                                                                                           | Antonio Jorge Martins; Claudia Renata dos Santos Barros; David Schlesinger; Debora Botequiu Moretti; Dimas Tadeu Covas; Elaine Cristina Marqueze; Elaine Vieira Santos; Evandra Strazza Rodrigues; Heidge Fukumasu; Jayme Augusto de Souza-Neto; José Salvatore Leister Patané; Luiz Alcantara; Luiz Lehmann Coutinho; Maria Carolina Elias; Mauricio Lacerda Nogueira; Rafael dos Santos Bezerra; Raul Machado Neto; Rejane Maria Tommasini Grotto; Ricardo Haddad; Sandra Coccuzzo Sampaio Vessoni; Simone Kashima; Svetoslav Nanev Slavov; Vincent Louis Viala                                                                                                                                                                                                                                                                                                                                                                                                |
| EPI_ISL_5800426                                                                     | Centro De Saude De Osvaldo Cruz                                                                                                                                                                                                                                                                                                                                                                                                                                      | Instituto Butantan                                                                                                                                                                           | Antonio Jorge Martins; Claudia Renata dos Santos Barros; David Schlesinger; Debora Botequiu Moretti; Dimas Tadeu Covas; Elaine Cristina Marqueze; Elaine Vieira Santos; Evandra Strazza Rodrigues; Heidge Fukumasu; Jayme Augusto de Souza-Neto; José Salvatore Leister Patané; Luiz Alcantara; Luiz Lehmann Coutinho; Maria Carolina Elias; Mauricio Lacerda Nogueira; Rafael dos Santos Bezerra; Raul Machado Neto; Rejane Maria Tommasini Grotto; Ricardo Haddad; Sandra Coccuzzo Sampaio Vessoni; Simone Kashima; Svetoslav Nanev Slavov; Vincent Louis Viala                                                                                                                                                                                                                                                                                                                                                                                                |
| EPI_ISL_1494895, EPI_ISL_1494903                                                    | Centro Hospitalar de Entre o Douro e Vouga (CHEDV)                                                                                                                                                                                                                                                                                                                                                                                                                   | Institute of Biomedicine (IBiMED), Universidade de Aveiro                                                                                                                                    | Gabriela Moura; Miguel Pinheiro and Manuel Santos; Patricia Arinto; Sofia Marques                                                                                                                                                                                                                                                                                                                                                                                                                                                                                                                                                                                                                                                                                                                                                                                                                                                                                |

|                                                                                                                                                                                                                                                                                                                                                                                                                                                                                                                                                                                                                                                                                       |                                                                                                      |                                                                                                                                                                                  |                                                                                                                                                                                                                                                                                                                                                                                                                                                                                                                                                                                                                                                                                                                                                                                                                                                                                                                                                                                                                                                                                                                                                                                                                                                                                                                                                                                                                                                                                                                                                                                                                                                                                                                                                                                                                                                                                                                                                  |
|---------------------------------------------------------------------------------------------------------------------------------------------------------------------------------------------------------------------------------------------------------------------------------------------------------------------------------------------------------------------------------------------------------------------------------------------------------------------------------------------------------------------------------------------------------------------------------------------------------------------------------------------------------------------------------------|------------------------------------------------------------------------------------------------------|----------------------------------------------------------------------------------------------------------------------------------------------------------------------------------|--------------------------------------------------------------------------------------------------------------------------------------------------------------------------------------------------------------------------------------------------------------------------------------------------------------------------------------------------------------------------------------------------------------------------------------------------------------------------------------------------------------------------------------------------------------------------------------------------------------------------------------------------------------------------------------------------------------------------------------------------------------------------------------------------------------------------------------------------------------------------------------------------------------------------------------------------------------------------------------------------------------------------------------------------------------------------------------------------------------------------------------------------------------------------------------------------------------------------------------------------------------------------------------------------------------------------------------------------------------------------------------------------------------------------------------------------------------------------------------------------------------------------------------------------------------------------------------------------------------------------------------------------------------------------------------------------------------------------------------------------------------------------------------------------------------------------------------------------------------------------------------------------------------------------------------------------|
| EPI_ISL_1138809, EPI_ISL_1494867, EPI_ISL_2329268                                                                                                                                                                                                                                                                                                                                                                                                                                                                                                                                                                                                                                     | Centro Hospitalar do Baixo Vouga (CHBV)                                                              | Institute of Biomedicine (IBIMED), Universidade de Aveiro                                                                                                                        | Gabriela Moura; Miguel Pinheiro and Manuel Santos; Patricia Arinto; Sofia Marques                                                                                                                                                                                                                                                                                                                                                                                                                                                                                                                                                                                                                                                                                                                                                                                                                                                                                                                                                                                                                                                                                                                                                                                                                                                                                                                                                                                                                                                                                                                                                                                                                                                                                                                                                                                                                                                                |
| EPI_ISL_2671577, EPI_ISL_7853165, EPI_ISL_7853183                                                                                                                                                                                                                                                                                                                                                                                                                                                                                                                                                                                                                                     | Centro de Diagnostico COVID-19 UABC Tijuana<br>Centro de Investigación Biomedica de Occidente (CIBO) | Andersen lab at Scripps Research<br>Unidad de Genomica Avanzada                                                                                                                  | German Ibarra; Jonathan Vincent Baena; Jorge Luis Jimenez Niebla; Manuel Sanchez Alavez; Oscar Efrén Zazueta Fierro; SEARCH Alliance San Diego with Idanya Rubi Serafin Higuera<br>; Alejandra García-Gasca; Alejandra Hernandez-Teran; Alejandro Sanchez-Flores; Alfredo Herrera-Estrella; Alicia Ocaña-Mondragón; Andreu Comas-García; Angel Gustavo Salas-Lais; Antonio Loza Roman; Bernardo Martínez-Miguel; Blanca Taboada; Brenda Irasema Maldonado-Meza; Bruno Gomez-Gil; Carla Ivón Herrera-Najera; Carlos F. Arias; Celia Boukadida; Celida Duque Molina; Celida Martínez- Rodríguez; Clara Esperanza Santacruz-Tinoco; Concepcion Grajales-Muniz; Concepcion Grajales-Muñiz; Consorcio Mexicano de Vigilancia Genómica (CoViGen-Mex). Authors (in alphabetical order): Julio Elias Alvarado-Yaah; Cristóbal Cháidez-Quiróz; Daniel Fregoso-Rueda; Daniel Lira Morales; Eduardo Becerril-Vargas; Fernando Fontove-Herrera; Fidencio Mejía-Nepomuceno; Francisco Pulido; Gloria Elena Espinosa-Ayala; Gloria Elena Espinosa-Ayala; Gloria María Molina-Salinas; Gloria Vazquez; Hector Esteban Paz-Juárez; Hector Montoya-Fuentes; Helen Haydee Fernanda Ramirez-Plascencia; Irvin Gonzalez-Lopez; Jean Pierre Gonzalez; Jesus Hernandez; Joel Armando Vazquez-Peréz.; Jorge Ivan Salinal-Hernandez; Jorge Salas-Hernandez; Jose Antonio Enciso-Moreno; Jose Esteban Muñoz-Medina; Jose de Jesus Nunez-Contreras; Jose de Jesus Nuñez-Contreras; Juan Bautista Chale-Dzul; Julissa Enciso-Ibarra; Luis Alberto Ochoa-Carrera; Margarita Matias-Florentino; María Guadalupe de Jesús Mireles-Rivera; María Guadalupe de Jesús Mireles-Rivera; Mario Mujica-Sanchez; Marissa Perez-García; Nelly Selem-Mojica; Pavel Isa; Ricardo Ciria Merce; Ricardo Grande; Rosa María Gutierrez Rios; Santiago Avila-Rios; Santiago avila-Rios; Selene Zarate; Susana Lopez; Veronica Mata-Haro; Victor Eduardo Garcia-Arias; Victor Hugo Borja-Aburto |
| EPI_ISL_500450                                                                                                                                                                                                                                                                                                                                                                                                                                                                                                                                                                                                                                                                        | Centro de Investigación Biomedica de La Rioja - Hospital San Pedro Logroño                           | SeqCOVID-SPAIN consortium/IBV(CSIC)                                                                                                                                              | José Manuel Azcona Gutiérrez; María Pilar Bea Escudero; María de Toro; Miriam Blasco Alberdi and SeqCOVID-SPAIN consortium                                                                                                                                                                                                                                                                                                                                                                                                                                                                                                                                                                                                                                                                                                                                                                                                                                                                                                                                                                                                                                                                                                                                                                                                                                                                                                                                                                                                                                                                                                                                                                                                                                                                                                                                                                                                                       |
| EPI_ISL_8826020                                                                                                                                                                                                                                                                                                                                                                                                                                                                                                                                                                                                                                                                       | Centro de Investigación Biomédica de Occidente (CIBO)                                                | Instituto de Biotecnología de la UNAM                                                                                                                                            | ; Alejandra García-Gasca; Alejandra Hernández-Terán; Alejandro Sánchez-Flores; Alfredo Herrera-Estrella; Alicia Ocaña-Mondragón; Andreu Comas-García; Angel Gustavo Salas-Lais; Antonio Loza Román; Bernardo Martínez-Miguel; Blanca Taboada; Brenda Irasema Maldonado-Meza; Bruno Gómez-Gil; Carla Ivón Herrera-Najera; Carlos F. Arias; Celia Boukadida; Clara Esperanza Santacruz-Tinoco; Concepcion Grajales-Muniz; Concepcion Grajales-Alvarado-Yaah; Cristóbal Cháidez-Quiróz; Célida Duque Molina; Célida Martínez- Rodríguez; Daniel Fregoso-Rueda; Daniel Lira Morales; Eduardo Becerril-Vargas; Fernando Fontove-Herrera; Fidencio Mejía-Nepomuceno; Francisco Pulido; Gloria Elena Espinosa-Ayala; Gloria Vazquez; Hector Esteban Paz-Juárez; Hector Montoya-Fuentes; Helen Haydee Fernanda Ramirez-Plascencia; Irvin Gonzalez-Lopez; Jean Pierre Gonzalez; Jose Antonio Enciso-Moreno; Jose Esteban Muñoz-Medina; Jose de Jesus Nunez-Contreras; Jose de Jesus Nuñez-Contreras; Juan Bautista Chale-Dzul; Julissa Enciso-Ibarra; Luis Alberto Ochoa-Carrera; Margarita Matias-Florentino; María Guadalupe de Jesús Mireles-Rivera; Nelly Selem-Mojica; Pavel Isa; Ricardo Ciria Merce; Ricardo Grande; Rosa María Gutiérrez Rios; Santiago Avila-Rios; Selene Zarate; Susana Lopez; Verónica Mata-Haro; Victor Eduardo García-Arias; Victor Hugo Borja-Aburto                                                                                                                                                                                                                                                                                                                                                                                                                                                                                                                                                                        |
| EPI_ISL_8910845, EPI_ISL_8910904                                                                                                                                                                                                                                                                                                                                                                                                                                                                                                                                                                                                                                                      | Centro de Investigación Biomédica de Occidente (CIBO)                                                | Unidad de Genomica Avanzada                                                                                                                                                      | Alejandro Sanchez-Flores; Alfredo Herrera-Estrella; Alicia Ocaña-Mondragón; Angel Gustavo Salas-Lais; Bernardo Martínez-Miguel; Blanca Taboada; Brenda Irasema Maldonado-Meza; Carla Ivon Herrera-Najera; Carlos F. Arias; Celia Boukadida; Clara Esperanza Santacruz-Tinoco; Concepcion Grajales-Muniz; Consorcio Mexicano de Vigilancia Genómica (CoViGen-Mex). Authors (in alphabetical order): Julio Elias Alvarado-Yaah; Fernando Fontove-Herrera; Francisco Pulido; Gloria Elena Espinosa-Ayala; Gloria María Molina-Salinas; Gloria Vazquez; Hector Esteban Paz-Juarez; Hector Montoya-Fuentes; Helen Haydee Fernanda Ramirez-Plascencia; Jorge Ivan Salinal-Nevarez; Jose Antonio Enciso-Moreno; Jose Esteban Muñoz-Medina; Jose de Jesus Nunez-Contreras; Juan Bautista Chale-Dzul; Luis Alberto Ochoa-Carrera; Margarita Matias-Florentino; María Guadalupe de Jesús Mireles-Rivera; Nelly Selem-Mojica; Pavel Isa; Ricardo Grande; Santiago Avila-Rios; Victor Hugo Borja-Aburto                                                                                                                                                                                                                                                                                                                                                                                                                                                                                                                                                                                                                                                                                                                                                                                                                                                                                                                                                      |
| EPI_ISL_3824136                                                                                                                                                                                                                                                                                                                                                                                                                                                                                                                                                                                                                                                                       | Centrum Medyczne Femina                                                                              | Wojewódzka Stacja Sanitarno-Epidemiologiczna w Katowicach                                                                                                                        | Beata Rozwadowska                                                                                                                                                                                                                                                                                                                                                                                                                                                                                                                                                                                                                                                                                                                                                                                                                                                                                                                                                                                                                                                                                                                                                                                                                                                                                                                                                                                                                                                                                                                                                                                                                                                                                                                                                                                                                                                                                                                                |
| EPI_ISL_6833097, EPI_ISL_8007604                                                                                                                                                                                                                                                                                                                                                                                                                                                                                                                                                                                                                                                      | Centrum Medyczne MEDYK Zakład Diagnostyki Medycznej                                                  | Wojewodzka Stacja Sanitarno-Epidemiologiczna w Rzeszowie, Laboratorium Diagnostyki Medycznej                                                                                     | Anna Nowakowska; Karolina Ostrowska; Katarzyna Wilk; Marzena Baranowska                                                                                                                                                                                                                                                                                                                                                                                                                                                                                                                                                                                                                                                                                                                                                                                                                                                                                                                                                                                                                                                                                                                                                                                                                                                                                                                                                                                                                                                                                                                                                                                                                                                                                                                                                                                                                                                                          |
| EPI_ISL_8202793, EPI_ISL_2798517                                                                                                                                                                                                                                                                                                                                                                                                                                                                                                                                                                                                                                                      | Centrum voor Medische Analyse<br>Centraäl Laboratoria, SIA                                           | Labo Klinische Biologie, UZA<br>Riga East University Hospital, National Microbiology Reference Laboratory; Eurofins Genomics Europe Sequencing GmbH                              | Basil Britto Xavier; Christine Lammens; Herman Goossens; Ines Verbesselt; Jasmine Coppens; Kathleen Holemans; Marie Le Mercier; Veerle Matheussen<br>Arzu Alguileva; Diāna Dušacka; Dārta Pūpola; Ilva Pole; Jana Ošite; Jenjevnis Bodrenko; Jūlija Čevere; Reinis Vangravs; Reinis Zeltmatis; Sergejs Nikšins; Stella Lapina; Širts Škenders                                                                                                                                                                                                                                                                                                                                                                                                                                                                                                                                                                                                                                                                                                                                                                                                                                                                                                                                                                                                                                                                                                                                                                                                                                                                                                                                                                                                                                                                                                                                                                                                    |
| EPI_ISL_5692537                                                                                                                                                                                                                                                                                                                                                                                                                                                                                                                                                                                                                                                                       | Cerballiance Paris IDF est Saint-Denis                                                               | Department of Virology, Henri Mondor University Hospital, Assistance Publique Hôpitaux de Paris, Université Paris-Est Créteil, INSERM U955                                       | Alexandre Soulier; Christophe Rodriguez; Elisabeth Trawinski; Guillaume Gricourt; Jean-Michel Pawlotski; Melissa N'Debi; Slim Fourati; Vanessa Demontant                                                                                                                                                                                                                                                                                                                                                                                                                                                                                                                                                                                                                                                                                                                                                                                                                                                                                                                                                                                                                                                                                                                                                                                                                                                                                                                                                                                                                                                                                                                                                                                                                                                                                                                                                                                         |
| EPI_ISL_909760                                                                                                                                                                                                                                                                                                                                                                                                                                                                                                                                                                                                                                                                        | Charité Universitätsmedizin Berlin, Institut für Virologie/Labor Berlin                              | Charité Universitätsmedizin Berlin, Institut für Virologie                                                                                                                       | Barbara Mühlemann; Christian Drosten; Julia Schneider; Julia Tesch; Jörn Beheim-Schwarzbach; Talitha Veith; Terry Jones; Tobias Bleicker; Victor M Corman                                                                                                                                                                                                                                                                                                                                                                                                                                                                                                                                                                                                                                                                                                                                                                                                                                                                                                                                                                                                                                                                                                                                                                                                                                                                                                                                                                                                                                                                                                                                                                                                                                                                                                                                                                                        |
| EPI_ISL_4235170, EPI_ISL_4235268                                                                                                                                                                                                                                                                                                                                                                                                                                                                                                                                                                                                                                                      | Charoenkrung pracharak hospital                                                                      | Division of Genomic Medicine and Innovation support, Department of Medical Sciences, Ministry of Public Health, Thailand                                                         | Archawin Rojanawitwat; Jirapha Pakdee; Natthakul Bunnang; Nuanjun Wichukhinda; Penpitcha Thawong; Pilailuk Akkapaiboon Okada; Pundharika Piboonsiri; Surakameth Mahasirimongkol; Waritta Sawaengdee                                                                                                                                                                                                                                                                                                                                                                                                                                                                                                                                                                                                                                                                                                                                                                                                                                                                                                                                                                                                                                                                                                                                                                                                                                                                                                                                                                                                                                                                                                                                                                                                                                                                                                                                              |
| EPI_ISL_4103361, EPI_ISL_3873731                                                                                                                                                                                                                                                                                                                                                                                                                                                                                                                                                                                                                                                      | Chhattisgarh Institute of Medical Sciences, Bilaspur<br>Chiba Prefectural Institute of Public Health | Institute of Life Sciences-INSACOG<br>Division of Virology and Zoology, Chiba Prefectural Institute of Public Health                                                             | Ajay Parida; Amol M. Kanampaliwar; Arup Ghosh; Atimutika Jha; INSACOG Consortium; Punit Prasad; Rajeeb Swain; Rupesh Dash; Safal Walia; Sana Fatma; Shifu Aggarwal; Sunil K. Raghav<br>Akihiro Takemura; Haruna Nishijima; Kentaro Itokawa; Makoto Kuroda; Mari Ohta; Masakatsu Taira; Masanori Hashino; Mika Takeuchi; Rina Tanaka; Shigenori Sato; Tsuyoshi Sekizuka; Yuji Hanada; Yuki Fujinuma                                                                                                                                                                                                                                                                                                                                                                                                                                                                                                                                                                                                                                                                                                                                                                                                                                                                                                                                                                                                                                                                                                                                                                                                                                                                                                                                                                                                                                                                                                                                               |
| EPI_ISL_686717                                                                                                                                                                                                                                                                                                                                                                                                                                                                                                                                                                                                                                                                        | Chiba Prefectural Institute of Public Health                                                         | Pathogen Genomics Center, National Institute of Infectious Diseases                                                                                                              | Kentaro Itokawa; Makoto Kuroda; Masanori Hashino; Rina Tanaka; Tsuyoshi Sekizuka                                                                                                                                                                                                                                                                                                                                                                                                                                                                                                                                                                                                                                                                                                                                                                                                                                                                                                                                                                                                                                                                                                                                                                                                                                                                                                                                                                                                                                                                                                                                                                                                                                                                                                                                                                                                                                                                 |
| EPI_ISL_8485241                                                                                                                                                                                                                                                                                                                                                                                                                                                                                                                                                                                                                                                                       | Child Health Research Foundation                                                                     | Child Health Research Foundation                                                                                                                                                 | ASM Alamgir; Ahmed Nawsher Alam; CHRf Bangladesh Genomics Team; Dinesh Mondal; Firdausi Qadri; Hassan Afrad; Mahbubur Rahman; Manjūr Hossain Khan; Mohammad Enayet Hossain; Mohammad Jubair; Mohammad Shahidul Islam; Mohammed Ziaur Rahman; Mustafizur Rahman; Razib Mazumder; Samir Kumar Saha; Senjuti Saha; Tahmina Shirin                                                                                                                                                                                                                                                                                                                                                                                                                                                                                                                                                                                                                                                                                                                                                                                                                                                                                                                                                                                                                                                                                                                                                                                                                                                                                                                                                                                                                                                                                                                                                                                                                   |
| EPI_ISL_5559293                                                                                                                                                                                                                                                                                                                                                                                                                                                                                                                                                                                                                                                                       | Chinese General Hospital                                                                             | Philippine Genome Center                                                                                                                                                         | Alethea R. de Guzman; Alyssa Joyce E. Telles; Anna Ong-Lim; Arienne A. Zamora; Benedict A. Maralit; Carlo M. Lapid; Celia Carlos; Cynthia P. Saloma; Devon Ray Pacial; Diomedes A. Cariño; Edsel Maurice Salvana; El King D. Morado; Elcid Aaron R. Pangilinan; Eva Maria Cutigongo-de la Paz; Francis A. Tablizo; Henrietta Marie Rodriguez; Jaime C. Montoya; Jan Michael C. Yap; Jarvin E. Nipales; Jo-Hannah S. Llames; John Michael Egana; John Q. Wong; Joshua Gregor A. Dizon; Joshua Jose Endozo; Juan Antonio R. Magalang; Karol Sophia Agape R. Padilla; Kris P. Punayan; Kristina Patriz Dela Cruz; Lindsay Clare D.L. Carandang; Ma. Exanil Planting; Marc Edsel C. Ayes; Maria Rosario Singh-Vergeire; Maria Sofia L. Yangzon; Marielle M. Gamboa; Marissa Alejandria; Niña Francesca Bustamante; Razel Nikka M. Hao; Renato Jacinto Q. Mantaring; Rianna Patricia S. Cruz; Shiela Mae M. Araiza; Yvonne Valerie Austria; Zipporah Mariebelle R. Enriquez; Zyrel V. Mollejón                                                                                                                                                                                                                                                                                                                                                                                                                                                                                                                                                                                                                                                                                                                                                                                                                                                                                                                                                        |
| EPI_ISL_4262003                                                                                                                                                                                                                                                                                                                                                                                                                                                                                                                                                                                                                                                                       | Chiu Laboratory, University of California, San Francisco                                             | Chiu Laboratory, University of California, San Francisco                                                                                                                         | Alicia Sotomayor-Gonzalez; Baolin Wang; Candace Wang; Charles Chiu; Daniel Wong; Dustin Glasner; Venice Servellita; Xianding (Wayne) Deng; Yueuan Zhang                                                                                                                                                                                                                                                                                                                                                                                                                                                                                                                                                                                                                                                                                                                                                                                                                                                                                                                                                                                                                                                                                                                                                                                                                                                                                                                                                                                                                                                                                                                                                                                                                                                                                                                                                                                          |
| EPI_ISL_8257927                                                                                                                                                                                                                                                                                                                                                                                                                                                                                                                                                                                                                                                                       | Ciputra Hospital Citra Raya Tangerang                                                                | Eijkman Research Center for Molecular Biology, National Research and Innovation Agency; Molecular Biology Laboratory, Faculty Medicine and Health Sciences, Warmadewa University | Amin Soebandrio; Edison Johar; Eryl Sintya; Fiqry Kleib; Frilisata A Yudhaputri; Hidayat Trimarsanto; Iskandar Adnan; Jessica R Saragih; Khin Saw Myint; Lidwina Priilani; Lydia V Panggalo; Muhammad Rezki Rasyak; Nabilla Zeina Sudrajat; Safarina G Malik; Shahnaz Mutia Dewi; Sri Masyeni; Sukma Oktavianthi; Willy Agustine                                                                                                                                                                                                                                                                                                                                                                                                                                                                                                                                                                                                                                                                                                                                                                                                                                                                                                                                                                                                                                                                                                                                                                                                                                                                                                                                                                                                                                                                                                                                                                                                                 |
| EPI_ISL_2232251, EPI_ISL_4520481, EPI_ISL_7809504                                                                                                                                                                                                                                                                                                                                                                                                                                                                                                                                                                                                                                     | City of Milwaukee Health Department Laboratory                                                       | City of Milwaukee Health Department Laboratory                                                                                                                                   | Amy Bauer; Jennifer Lentz; Jenny Lentz; Joshua Weiner; Manjeet Khubbar; Nandhakumar Balakrishnan; Nandhukumar Balakrishnan; Samantha Scott; Sanjib Bhattacharyya                                                                                                                                                                                                                                                                                                                                                                                                                                                                                                                                                                                                                                                                                                                                                                                                                                                                                                                                                                                                                                                                                                                                                                                                                                                                                                                                                                                                                                                                                                                                                                                                                                                                                                                                                                                 |
| EPI_ISL_4936444, EPI_ISL_7093195                                                                                                                                                                                                                                                                                                                                                                                                                                                                                                                                                                                                                                                      | Clemenshospital - Alexianer Clemenshospital Münster                                                  | Robert Koch Institute                                                                                                                                                            |                                                                                                                                                                                                                                                                                                                                                                                                                                                                                                                                                                                                                                                                                                                                                                                                                                                                                                                                                                                                                                                                                                                                                                                                                                                                                                                                                                                                                                                                                                                                                                                                                                                                                                                                                                                                                                                                                                                                                  |
| EPI_ISL_911556                                                                                                                                                                                                                                                                                                                                                                                                                                                                                                                                                                                                                                                                        | Clinical Diagnostics Laboratory, Diagnostic & Experimental Pathology, Lilly Research Laboratories    | Clinical Diagnostics Laboratory, Diagnostic & Experimental Pathology, Lilly Research Laboratories                                                                                | Andrew Schade; Angie Fulford; Erin Wray; Jeff Fill; Joe Oakley; John Calley; John McElwee; Leslie O'Neill Reising; Mayuri Vaidya; Pat Finnegan; Phil Ebert; Rachael Redmond; Sam McNeely; Tim Holzer                                                                                                                                                                                                                                                                                                                                                                                                                                                                                                                                                                                                                                                                                                                                                                                                                                                                                                                                                                                                                                                                                                                                                                                                                                                                                                                                                                                                                                                                                                                                                                                                                                                                                                                                             |
| EPI_ISL_4955924, EPI_ISL_5143362, EPI_ISL_5143399, EPI_ISL_5144652, EPI_ISL_5144670, EPI_ISL_5241041, EPI_ISL_5315191, EPI_ISL_5315213, EPI_ISL_5741450, EPI_ISL_5741907, EPI_ISL_6482408                                                                                                                                                                                                                                                                                                                                                                                                                                                                                             | see above<br>Clinical Emergency County Hospital, Craiova                                             | Cantacuzino National Military-Medical Institute, Viral Respiratory Infections Laboratory                                                                                         | Carmen Cherciu; Luiza Ustea; Mihaela Lazar; Mihaela Oprea; Nicoleta Paraschiv; Sorin Dinu                                                                                                                                                                                                                                                                                                                                                                                                                                                                                                                                                                                                                                                                                                                                                                                                                                                                                                                                                                                                                                                                                                                                                                                                                                                                                                                                                                                                                                                                                                                                                                                                                                                                                                                                                                                                                                                        |
| EPI_ISL_5144678, EPI_ISL_5144685, EPI_ISL_5241285                                                                                                                                                                                                                                                                                                                                                                                                                                                                                                                                                                                                                                     | Clinical Hospital of Infectious Diseases, Cluj-Napoca                                                | Cantacuzino National Military-Medical Institute, Viral Respiratory Infections Laboratory                                                                                         | Carmen Cherciu; Luiza Ustea; Mihaela Lazar; Mihaela Oprea; Nicoleta Paraschiv; Sorin Dinu                                                                                                                                                                                                                                                                                                                                                                                                                                                                                                                                                                                                                                                                                                                                                                                                                                                                                                                                                                                                                                                                                                                                                                                                                                                                                                                                                                                                                                                                                                                                                                                                                                                                                                                                                                                                                                                        |
| EPI_ISL_483571                                                                                                                                                                                                                                                                                                                                                                                                                                                                                                                                                                                                                                                                        | Clinical Microbiology Laboratory- Basurto University Hospital                                        | Biocruces-Bizkaia                                                                                                                                                                | Ana Belén Belén de la Hoz; Estibaliz Ugalde-Zarraga; José Luis Díaz de Tuesta del Arco; Matxalen Vidal-García; Mikel J. Urrutikoetxea-Gutierrez; M <sup>o</sup> Carmen Nieto Toboso                                                                                                                                                                                                                                                                                                                                                                                                                                                                                                                                                                                                                                                                                                                                                                                                                                                                                                                                                                                                                                                                                                                                                                                                                                                                                                                                                                                                                                                                                                                                                                                                                                                                                                                                                              |
| EPI_ISL_1468486, EPI_ISL_1534153, EPI_ISL_2103588, EPI_ISL_2969576, EPI_ISL_5462172, EPI_ISL_9242404                                                                                                                                                                                                                                                                                                                                                                                                                                                                                                                                                                                  | Clinical Microbiology, Infection Prevention and Control                                              | Section for Molecular Diagnostics                                                                                                                                                | Björn Hallström; Jonas Björkman                                                                                                                                                                                                                                                                                                                                                                                                                                                                                                                                                                                                                                                                                                                                                                                                                                                                                                                                                                                                                                                                                                                                                                                                                                                                                                                                                                                                                                                                                                                                                                                                                                                                                                                                                                                                                                                                                                                  |
| EPI_ISL_877644                                                                                                                                                                                                                                                                                                                                                                                                                                                                                                                                                                                                                                                                        | Clinical Molecular Microbiology Laboratory, UNC Hospital                                             | Dirk Dittmer                                                                                                                                                                     | Angelica Juarez; Blossom Damania.; Brent A. Eason; Cameron Grant; Carolina Caro-Velas; Cecilia Thompson; Dirk Dittmer; Evelyn Hoffman; Jason Wong; Justin T. Landis; Linda Pluta; Melissa B. Miller; Patricio Cano; Razia Moorad                                                                                                                                                                                                                                                                                                                                                                                                                                                                                                                                                                                                                                                                                                                                                                                                                                                                                                                                                                                                                                                                                                                                                                                                                                                                                                                                                                                                                                                                                                                                                                                                                                                                                                                 |
| EPI_ISL_1137510, EPI_ISL_1240837, EPI_ISL_1240931, EPI_ISL_1854805, EPI_ISL_4564712, EPI_ISL_5230456, EPI_ISL_6155128, EPI_ISL_7156619, EPI_ISL_8511189                                                                                                                                                                                                                                                                                                                                                                                                                                                                                                                               | see above<br>Clinical Molecular Microbiology Laboratory, UNC Hospitals                               | Jeremy Wang                                                                                                                                                                      | Alexander Rubinsteyn; Bravada Hill; Colleen Rice; Corbin Jones; Jason Smedberg; Jeremy Wang; Katie Martin; Melissa Miller; Robert Hagan; Sayal Gairales-Medrano; Shawn Hawken; Tara Skelly                                                                                                                                                                                                                                                                                                                                                                                                                                                                                                                                                                                                                                                                                                                                                                                                                                                                                                                                                                                                                                                                                                                                                                                                                                                                                                                                                                                                                                                                                                                                                                                                                                                                                                                                                       |
| EPI_ISL_891932, EPI_ISL_830971, EPI_ISL_5841702                                                                                                                                                                                                                                                                                                                                                                                                                                                                                                                                                                                                                                       | Clinical Virology                                                                                    | Clinical Bacteriology                                                                                                                                                            | Adrian Egli; Alexander Gensch; Alfredo Mari; Christian Nickel; Fanny Wegner; Hans Hirsch; Hans Pargger; Helena MB Seth-Smith; Julia Bielecki; Karoline Leuzinger; Kirstine K. Soegaard; Madlen Stange; Manuel Battagay; Martin Siegemund; Michael Oetthoff; Michael Schweitzer; Myrta Brunner; Rita Schneider-Slifemela; Rita Schneider-Sliwa; Roland Bingisser; Sarah Tschudin-Sutter; Simon Fuchs; Stefano Bassetti; Tim Roloff                                                                                                                                                                                                                                                                                                                                                                                                                                                                                                                                                                                                                                                                                                                                                                                                                                                                                                                                                                                                                                                                                                                                                                                                                                                                                                                                                                                                                                                                                                                |
| EPI_ISL_3261516, EPI_ISL_8551475                                                                                                                                                                                                                                                                                                                                                                                                                                                                                                                                                                                                                                                      | Clinique Saint-Pierre Ottignies<br>Cliniques universitaires Saint-Luc                                | UCLouvain/REC/MBLG<br>UCLouvain/REC/MBLG-CTMA                                                                                                                                    | Benoit Kabamba Mukadi; Bertrand Bearzatto; Jean Ruelle<br>Benoit Kabamba Mukadi; Bertrand Bearzatto; Jean-Luc Gala; Nicolas Pinte; Paul Blanpain; Simon Ophélie; Valentin Coste                                                                                                                                                                                                                                                                                                                                                                                                                                                                                                                                                                                                                                                                                                                                                                                                                                                                                                                                                                                                                                                                                                                                                                                                                                                                                                                                                                                                                                                                                                                                                                                                                                                                                                                                                                  |
| EPI_ISL_1234326, EPI_ISL_1540089, EPI_ISL_2310159, EPI_ISL_2310213, EPI_ISL_3842202, EPI_ISL_3842577, EPI_ISL_4574575, EPI_ISL_4574576, EPI_ISL_4945019, EPI_ISL_5056378, EPI_ISL_5157960, EPI_ISL_5157987, EPI_ISL_5253673, EPI_ISL_5415317, EPI_ISL_5705017, EPI_ISL_5706039, EPI_ISL_5776101, EPI_ISL_5931927, EPI_ISL_5932124, EPI_ISL_6229991, EPI_ISL_6677538, EPI_ISL_6677554, EPI_ISL_6910871, EPI_ISL_6912782, EPI_ISL_6913236, EPI_ISL_6936282, EPI_ISL_7331324, EPI_ISL_7325281, EPI_ISL_7458255, EPI_ISL_7459141, EPI_ISL_7501210, EPI_ISL_7504642, EPI_ISL_7711994, EPI_ISL_7830334, EPI_ISL_7923867, EPI_ISL_8063736, EPI_ISL_8063958, EPI_ISL_8064814, EPI_ISL_8124066 | see above<br>Colorado Department of Public Health and Environment                                    | Colorado Department of Public Health and Environment                                                                                                                             | Alexandria Rosshem; Arianna Smith; Diana Ir. Emily A. Travanty; Laura Bankers; Mandy Waters; Michael A. Martin; Michael Martin; Molly C. Hetherington-Rauth; Sarah Elizabeth Totten; Shannon Ely; Shannon R. Matzinger                                                                                                                                                                                                                                                                                                                                                                                                                                                                                                                                                                                                                                                                                                                                                                                                                                                                                                                                                                                                                                                                                                                                                                                                                                                                                                                                                                                                                                                                                                                                                                                                                                                                                                                           |
| EPI_ISL_681308, EPI_ISL_6266481                                                                                                                                                                                                                                                                                                                                                                                                                                                                                                                                                                                                                                                       | Communicable Disease Laboratory, Public Health Directorate                                           | Communicable Disease Laboratory, Public Health Directorate                                                                                                                       | AlAbbas, Z.; AlAnsari, W.; AlHuajiri, Z.; AlTooo, M.; Almoamen, G.; Altaif, Z.; Alwasti, H.; Khamees, F.; Marhoon, A.                                                                                                                                                                                                                                                                                                                                                                                                                                                                                                                                                                                                                                                                                                                                                                                                                                                                                                                                                                                                                                                                                                                                                                                                                                                                                                                                                                                                                                                                                                                                                                                                                                                                                                                                                                                                                            |
| EPI_ISL_474831, EPI_ISL_862570                                                                                                                                                                                                                                                                                                                                                                                                                                                                                                                                                                                                                                                        | Complejo Hospitalario Universitario de Albacete<br>Complejo Hospitalario de Navarra                  | SeqCOVID-SPAIN consortium/IBV(CSIC)<br>Instituto de Salud Carlos III                                                                                                             | Caridad Sainz de Baranda Camino and SeqCOVID-SPAIN consortium; Encarnacion Simarro Córdoba; Julia Lozano Serra; Lorena Robles Fonseca; Monica Parra Grandes<br>A. Monzón; F. Casas; I. Ezpeleta, C.; I. Jiménez; Iglesias-Caballero; M. Pozo; M. Cuesta; M. González-Esguevillas; M. Zaballos; M. Camarero; P. Jiménez; S. Juliá; S. Molinero Calamita; S. Varona                                                                                                                                                                                                                                                                                                                                                                                                                                                                                                                                                                                                                                                                                                                                                                                                                                                                                                                                                                                                                                                                                                                                                                                                                                                                                                                                                                                                                                                                                                                                                                                |

|                 |                                                                                                                                                                                         |                                                                                                                                                                                         |                                                                                                                                                                                                                                                                                                                                                                                                                                                                                                                                                                                                                                                                                                                                                                                                                                                                                                                                                   |                 |                 |                 |                 |                 |                 |                 |                 |                 |                 |                 |                 |                 |                 |                 |                 |                 |                 |
|-----------------|-----------------------------------------------------------------------------------------------------------------------------------------------------------------------------------------|-----------------------------------------------------------------------------------------------------------------------------------------------------------------------------------------|---------------------------------------------------------------------------------------------------------------------------------------------------------------------------------------------------------------------------------------------------------------------------------------------------------------------------------------------------------------------------------------------------------------------------------------------------------------------------------------------------------------------------------------------------------------------------------------------------------------------------------------------------------------------------------------------------------------------------------------------------------------------------------------------------------------------------------------------------------------------------------------------------------------------------------------------------|-----------------|-----------------|-----------------|-----------------|-----------------|-----------------|-----------------|-----------------|-----------------|-----------------|-----------------|-----------------|-----------------|-----------------|-----------------|-----------------|-----------------|-----------------|
| EPI_ISL_862644  | Consejería de Sanidad y Asuntos Sociales                                                                                                                                                | Instituto de Salud Carlos III                                                                                                                                                           | A. Monzón; F. Casas; I. Gutiérrez, G.; J. Jiménez; Iglesias-Caballero; M. Camarero; M. Cuesta; M. González-Esguevillas; M. Pozo; M. Zaballos; P. Jiménez; S. Juliá; S. Molinero Calamita; S. Varona                                                                                                                                                                                                                                                                                                                                                                                                                                                                                                                                                                                                                                                                                                                                               |                 |                 |                 |                 |                 |                 |                 |                 |                 |                 |                 |                 |                 |                 |                 |                 |                 |                 |
| EPI_ISL_2341493 | Contra Costa County Public Health Lab                                                                                                                                                   | Chan-Zuckerberg Biohub                                                                                                                                                                  | CZB Cliahub Consortium                                                                                                                                                                                                                                                                                                                                                                                                                                                                                                                                                                                                                                                                                                                                                                                                                                                                                                                            |                 |                 |                 |                 |                 |                 |                 |                 |                 |                 |                 |                 |                 |                 |                 |                 |                 |                 |
| EPI_ISL_4928977 | Contra Costa Public Health Laboratory                                                                                                                                                   | Contra Costa Public Health Laboratory                                                                                                                                                   | Contra Costa Public Health Laboratory                                                                                                                                                                                                                                                                                                                                                                                                                                                                                                                                                                                                                                                                                                                                                                                                                                                                                                             |                 |                 |                 |                 |                 |                 |                 |                 |                 |                 |                 |                 |                 |                 |                 |                 |                 |                 |
| EPI_ISL_6384350 |                                                                                                                                                                                         |                                                                                                                                                                                         |                                                                                                                                                                                                                                                                                                                                                                                                                                                                                                                                                                                                                                                                                                                                                                                                                                                                                                                                                   |                 |                 |                 |                 |                 |                 |                 |                 |                 |                 |                 |                 |                 |                 |                 |                 |                 |                 |
| EPI_ISL_5903350 | Cornell COVID-19 Testing Laboratory (CCTL)                                                                                                                                              | Cornell COVID-19 Testing Laboratory (CCTL)                                                                                                                                              | Brittany C. Cronk; Diego G. DieI; Leonardo Cardia Caserta                                                                                                                                                                                                                                                                                                                                                                                                                                                                                                                                                                                                                                                                                                                                                                                                                                                                                         |                 |                 |                 |                 |                 |                 |                 |                 |                 |                 |                 |                 |                 |                 |                 |                 |                 |                 |
| EPI_ISL_5544452 | Cotabato Regional and Medical Center                                                                                                                                                    | Philippine Genome Center                                                                                                                                                                | Alethea R. de Guzman; Anna Ong-Lim; Arianne A. Zamora; Benedict A. Maralit; Carlo M. Lapid; Celia Carlos; Cynthia P. Saloma; Devon Ray Pacial; Diomedes A. Cariño; Edsel Maurice Salvana; El King D. Morado; Elcid Aaron R. Pangilinan; Eva Maria Cutiongco-de la Paz; Francis A. Tablizo; Henrietta Marie Rodriguez; Jaime C. Montoya; Jan Michael C. Yap; Jarvin E. Nipales; Jo-Hannah S. Llamas; John Q. Wong; Joshua Gregor A. Dizon; Juan Antonio R. Magalang; Karol Sophia Agape R. Padilla; Kenneth M. Kim; Kris P. Punayan; Kristina Patriz Dela Cruz; Lindsay Clare D.L. Carandang; Ma. Exanil Plantig; Marc Edsel C. Ayes; Maria Rosario Singh-Vergeire; Maria Sofia L. Yangzon; Marielle M. Gamboa; Marissa Alejandria; Niña Francesca Bustamante; Razel Nikka M. Hao; Renato Jacinto Q. Mantaring; Rianna Patricia S. Cruz; Shiela Mae M. Araiza; Yvonne Valerie Austria; Zipporah Mariebelle R. Enriquez; Zyrrel V. Mollejon         |                 |                 |                 |                 |                 |                 |                 |                 |                 |                 |                 |                 |                 |                 |                 |                 |                 |                 |
| EPI_ISL_2878055 | County Hospital of Liberec, Dept. of genetic and molecular diagnostic                                                                                                                   | Institute of Medical Microbiology and Virology, University Hospital Carl Gustav Carus, TU Dresden                                                                                       | Alexa Laubner; Alexander Dalpke; Anett Zabzinski; Fabian Rost; Grit Mehnert; Iva Dolinová; Johanna Beil; Leo Büttner; Marlena Stadtmüller; Montserrat Palau de Miquel; Susanne Reinhardt; Sylke Winkler; Sylvia Klemroth                                                                                                                                                                                                                                                                                                                                                                                                                                                                                                                                                                                                                                                                                                                          |                 |                 |                 |                 |                 |                 |                 |                 |                 |                 |                 |                 |                 |                 |                 |                 |                 |                 |
| EPI_ISL_2919991 |                                                                                                                                                                                         |                                                                                                                                                                                         |                                                                                                                                                                                                                                                                                                                                                                                                                                                                                                                                                                                                                                                                                                                                                                                                                                                                                                                                                   |                 |                 |                 |                 |                 |                 |                 |                 |                 |                 |                 |                 |                 |                 |                 |                 |                 |                 |
| EPI_ISL_548327  | County of Santa Clara Public Health Department                                                                                                                                          | Chan-Zuckerberg Biohub                                                                                                                                                                  | CZB Cliahub Consortium                                                                                                                                                                                                                                                                                                                                                                                                                                                                                                                                                                                                                                                                                                                                                                                                                                                                                                                            |                 |                 |                 |                 |                 |                 |                 |                 |                 |                 |                 |                 |                 |                 |                 |                 |                 |                 |
| EPI_ISL_548536  |                                                                                                                                                                                         |                                                                                                                                                                                         |                                                                                                                                                                                                                                                                                                                                                                                                                                                                                                                                                                                                                                                                                                                                                                                                                                                                                                                                                   |                 |                 |                 |                 |                 |                 |                 |                 |                 |                 |                 |                 |                 |                 |                 |                 |                 |                 |
| EPI_ISL_1443522 | Croatian Institute of Public Health                                                                                                                                                     | Croatian Institute of Public Health                                                                                                                                                     | Irena Tabain; Ivana Ferencak                                                                                                                                                                                                                                                                                                                                                                                                                                                                                                                                                                                                                                                                                                                                                                                                                                                                                                                      |                 |                 |                 |                 |                 |                 |                 |                 |                 |                 |                 |                 |                 |                 |                 |                 |                 |                 |
| EPI_ISL_2657834 |                                                                                                                                                                                         |                                                                                                                                                                                         |                                                                                                                                                                                                                                                                                                                                                                                                                                                                                                                                                                                                                                                                                                                                                                                                                                                                                                                                                   |                 |                 |                 |                 |                 |                 |                 |                 |                 |                 |                 |                 |                 |                 |                 |                 |                 |                 |
| EPI_ISL_2756034 | Curative Labs                                                                                                                                                                           | Curative Labs                                                                                                                                                                           | Elias L. Salfati; Eugenia Khorosheva; George Way; J.Cesar Ignacio-Espinoza; Janet Chen; Mikhail Hanewich-Hollatz; Nabjot Sandhu; Sophia Quasem; Vladimir Slepnev; Zhiyi Xie                                                                                                                                                                                                                                                                                                                                                                                                                                                                                                                                                                                                                                                                                                                                                                       |                 |                 |                 |                 |                 |                 |                 |                 |                 |                 |                 |                 |                 |                 |                 |                 |                 |                 |
| EPI_ISL_3229265 | Curative Labs                                                                                                                                                                           | New Mexico Department of Health Scientific Laboratory                                                                                                                                   | D'eldra Malone; Ellie Johnson; Jennifer Benoit; Linda Salazar Anastacia Griego-Fisher; Ratheesh Rajan; T. Mark Willmon                                                                                                                                                                                                                                                                                                                                                                                                                                                                                                                                                                                                                                                                                                                                                                                                                            |                 |                 |                 |                 |                 |                 |                 |                 |                 |                 |                 |                 |                 |                 |                 |                 |                 |                 |
| EPI_ISL_4413432 | EPI_ISL_4414167                                                                                                                                                                         | EPI_ISL_4414313                                                                                                                                                                         | EPI_ISL_4415813                                                                                                                                                                                                                                                                                                                                                                                                                                                                                                                                                                                                                                                                                                                                                                                                                                                                                                                                   | EPI_ISL_4415857 | EPI_ISL_4415911 | EPI_ISL_4427184 | EPI_ISL_6992168 | EPI_ISL_6994510 | EPI_ISL_6998355 | EPI_ISL_7000292 | EPI_ISL_7363739 | EPI_ISL_7364932 | EPI_ISL_7743916 | EPI_ISL_8766018 |                 |                 |                 |                 |                 |                 |                 |
| see above       | DASA                                                                                                                                                                                    | DASA                                                                                                                                                                                    | Adriano Bonaldi; Angelica Hristov; Annelise Lopes; Bianca Cota; Camila Romano; Cristina Oliveira; Jose Levi; Lidia Yamamoto; Luciane Sussuchi; Paulo Pierry; Rodrigo Guarischi; Rodrigo Salazar                                                                                                                                                                                                                                                                                                                                                                                                                                                                                                                                                                                                                                                                                                                                                   |                 |                 |                 |                 |                 |                 |                 |                 |                 |                 |                 |                 |                 |                 |                 |                 |                 |                 |
| EPI_ISL_1678292 | DC Public Health Lab/ Dept. of Forensic Sciences                                                                                                                                        | Centers for Disease Control and Prevention Division of Viral Diseases, Pathogen Discovery                                                                                               | Alison Laufer Halpin; Ben L. Rambo-Martin; Clinton R. Paden; Dakota Howard; Darlene Wagner; David Wentworth; Dhwanii Bata; Jasmine Padilla; Justin Lee; Katie Dillon; Krista Queen; Kristen Knipe; Kristine Lacey; Mark Burroughs; Matthew Schmerer; Mill Shett; Peter Cook; Sam Shephard; Sarah Nobles; Shoshona Le; Suxiang Tang; Vivien Dungan; Yvette Unoaorumi                                                                                                                                                                                                                                                                                                                                                                                                                                                                                                                                                                               |                 |                 |                 |                 |                 |                 |                 |                 |                 |                 |                 |                 |                 |                 |                 |                 |                 |                 |
| EPI_ISL_2930630 | DC Public Health Lab/ Dept. of Forensic Sciences                                                                                                                                        | DC Public Health Lab/ Dept. of Forensic Sciences                                                                                                                                        | Brittany Hamilton; Connie Maza; David Payne; Elizabeth Zelaya; Janis Doss; Jocelyn Hauser; Monica Mann; Sarah Scott; Scott Nguyen                                                                                                                                                                                                                                                                                                                                                                                                                                                                                                                                                                                                                                                                                                                                                                                                                 |                 |                 |                 |                 |                 |                 |                 |                 |                 |                 |                 |                 |                 |                 |                 |                 |                 |                 |
| EPI_ISL_2235368 | DIP. PREV. AVEZZANO SERVIZIO DI IGIENE EPIDEMIOLOGIA E SANITA' PUBBLICA                                                                                                                 | Istituto Zooprofilattico Sperimentale dell'Abruzzo e Molise "G. Caporale"                                                                                                               | Ancora M; Calistri P; Cammà C; Caporale M; Curini V; Delli Compagni E; Di Domenico M; Di Lollo Valeria; Di Pasquale A; Lorusso A; Mangione I; Marccacci M; Puglia I; Rinaldi A; Savini G; Scialabba S                                                                                                                                                                                                                                                                                                                                                                                                                                                                                                                                                                                                                                                                                                                                             |                 |                 |                 |                 |                 |                 |                 |                 |                 |                 |                 |                 |                 |                 |                 |                 |                 |                 |
| EPI_ISL_2235411 |                                                                                                                                                                                         |                                                                                                                                                                                         |                                                                                                                                                                                                                                                                                                                                                                                                                                                                                                                                                                                                                                                                                                                                                                                                                                                                                                                                                   |                 |                 |                 |                 |                 |                 |                 |                 |                 |                 |                 |                 |                 |                 |                 |                 |                 |                 |
| EPI_ISL_823853  | DOHMH Crown Heights                                                                                                                                                                     | New York City Public Health Laboratory                                                                                                                                                  | Jade Wang; et al.                                                                                                                                                                                                                                                                                                                                                                                                                                                                                                                                                                                                                                                                                                                                                                                                                                                                                                                                 |                 |                 |                 |                 |                 |                 |                 |                 |                 |                 |                 |                 |                 |                 |                 |                 |                 |                 |
| EPI_ISL_823955  | DOHMH Jamaica                                                                                                                                                                           | New York City Public Health Laboratory                                                                                                                                                  | Jade Wang; et al.                                                                                                                                                                                                                                                                                                                                                                                                                                                                                                                                                                                                                                                                                                                                                                                                                                                                                                                                 |                 |                 |                 |                 |                 |                 |                 |                 |                 |                 |                 |                 |                 |                 |                 |                 |                 |                 |
| EPI_ISL_3254236 | DOHMH PHL                                                                                                                                                                               | New York City Public Health Laboratory                                                                                                                                                  | Jade Wang; et al.                                                                                                                                                                                                                                                                                                                                                                                                                                                                                                                                                                                                                                                                                                                                                                                                                                                                                                                                 |                 |                 |                 |                 |                 |                 |                 |                 |                 |                 |                 |                 |                 |                 |                 |                 |                 |                 |
| EPI_ISL_933738  | DPHL                                                                                                                                                                                    | Delaware Public Health Lab                                                                                                                                                              | Gregory Hovan; Holly Miller; Moneeb Bajwa                                                                                                                                                                                                                                                                                                                                                                                                                                                                                                                                                                                                                                                                                                                                                                                                                                                                                                         |                 |                 |                 |                 |                 |                 |                 |                 |                 |                 |                 |                 |                 |                 |                 |                 |                 |                 |
| EPI_ISL_7307643 |                                                                                                                                                                                         |                                                                                                                                                                                         |                                                                                                                                                                                                                                                                                                                                                                                                                                                                                                                                                                                                                                                                                                                                                                                                                                                                                                                                                   |                 |                 |                 |                 |                 |                 |                 |                 |                 |                 |                 |                 |                 |                 |                 |                 |                 |                 |
| EPI_ISL_7307659 |                                                                                                                                                                                         |                                                                                                                                                                                         |                                                                                                                                                                                                                                                                                                                                                                                                                                                                                                                                                                                                                                                                                                                                                                                                                                                                                                                                                   |                 |                 |                 |                 |                 |                 |                 |                 |                 |                 |                 |                 |                 |                 |                 |                 |                 |                 |
| EPI_ISL_7708109 |                                                                                                                                                                                         |                                                                                                                                                                                         |                                                                                                                                                                                                                                                                                                                                                                                                                                                                                                                                                                                                                                                                                                                                                                                                                                                                                                                                                   |                 |                 |                 |                 |                 |                 |                 |                 |                 |                 |                 |                 |                 |                 |                 |                 |                 |                 |
| EPI_ISL_9093836 |                                                                                                                                                                                         |                                                                                                                                                                                         |                                                                                                                                                                                                                                                                                                                                                                                                                                                                                                                                                                                                                                                                                                                                                                                                                                                                                                                                                   |                 |                 |                 |                 |                 |                 |                 |                 |                 |                 |                 |                 |                 |                 |                 |                 |                 |                 |
| EPI_ISL_1229080 | DYOMEDEA LYON                                                                                                                                                                           | CNR Virus des Infections Respiratoires - France SUD                                                                                                                                     | Antonin Bal; Bruno Lina; Bruno Simon; Gregory Destras; Gwendolynne Burfin; Hadrien Regue; Laurence Josset; Martine Valette; Quentin Semanas                                                                                                                                                                                                                                                                                                                                                                                                                                                                                                                                                                                                                                                                                                                                                                                                       |                 |                 |                 |                 |                 |                 |                 |                 |                 |                 |                 |                 |                 |                 |                 |                 |                 |                 |
| EPI_ISL_3206369 | DYOMEDEA-LABORATOIRE DE LA SAUVEGARDE                                                                                                                                                   | CNR Virus des Infections Respiratoires - France SUD                                                                                                                                     | Antonin Bal; Bruno Lina; Bruno Simon; Gregory Destras; Gwendolynne Burfin; Hadrien Regue; Laurence Josset; Martine Valette; Quentin Semanas                                                                                                                                                                                                                                                                                                                                                                                                                                                                                                                                                                                                                                                                                                                                                                                                       |                 |                 |                 |                 |                 |                 |                 |                 |                 |                 |                 |                 |                 |                 |                 |                 |                 |                 |
| EPI_ISL_5313779 |                                                                                                                                                                                         |                                                                                                                                                                                         |                                                                                                                                                                                                                                                                                                                                                                                                                                                                                                                                                                                                                                                                                                                                                                                                                                                                                                                                                   |                 |                 |                 |                 |                 |                 |                 |                 |                 |                 |                 |                 |                 |                 |                 |                 |                 |                 |
| EPI_ISL_5914200 |                                                                                                                                                                                         |                                                                                                                                                                                         |                                                                                                                                                                                                                                                                                                                                                                                                                                                                                                                                                                                                                                                                                                                                                                                                                                                                                                                                                   |                 |                 |                 |                 |                 |                 |                 |                 |                 |                 |                 |                 |                 |                 |                 |                 |                 |                 |
| EPI_ISL_5569796 | Davao One World Diagnostic Center Incorporated                                                                                                                                          | Philippine Genome Center                                                                                                                                                                | Alethea R. de Guzman; Alyssa Joyce E. Telles; Anna Ong-Lim; Arianne A. Zamora; Benedict A. Maralit; Carlo M. Lapid; Celia Carlos; Cynthia P. Saloma; Devon Ray Pacial; Diomedes A. Cariño; Edsel Maurice Salvana; El King D. Morado; Elcid Aaron R. Pangilinan; Eva Maria Cutiongco-de la Paz; Francis A. Tablizo; Henrietta Marie Rodriguez; Jaime C. Montoya; Jan Michael C. Yap; Jarvin E. Nipales; Jo-Hannah S. Llamas; John Q. Wong; Joshua Gregor A. Dizon; Juan Antonio R. Magalang; Karol Sophia Agape R. Padilla; Kris P. Punayan; Kristina Patriz Dela Cruz; Lindsay Clare D.L. Carandang; Ma. Exanil Plantig; Marc Edsel C. Ayes; Maria Rosario Singh-Vergeire; Maria Sofia L. Yangzon; Marielle M. Gamboa; Marissa Alejandria; Niña Francesca Bustamante; Razel Nikka M. Hao; Renato Jacinto Q. Mantaring; Rianna Patricia S. Cruz; Shiela Mae M. Araiza; Yvonne Valerie Austria; Zipporah Mariebelle R. Enriquez; Zyrrel V. Mollejon |                 |                 |                 |                 |                 |                 |                 |                 |                 |                 |                 |                 |                 |                 |                 |                 |                 |                 |
| EPI_ISL_4713056 | Davao Regional Medical Center                                                                                                                                                           | Philippine Genome Center                                                                                                                                                                | Alethea R. de Guzman; Anna Ong-Lim; Arianne A. Zamora; Benedict A. Maralit; Carlo M. Lapid; Celia Carlos; Cynthia P. Saloma; Devon Ray Pacial; Diomedes A. Cariño; Edsel Maurice Salvana; El King D. Morado; Elcid Aaron R. Pangilinan; Eva Maria Cutiongco-de la Paz; Francis A. Tablizo; Henrietta Marie Rodriguez; Jaime C. Montoya; Jan Michael C. Yap; Jarvin E. Nipales; Jo-Hannah S. Llamas; John Q. Wong; Joshua Gregor A. Dizon; Juan Antonio R. Magalang; Karol Sophia Agape R. Padilla; Kenneth M. Kim; Kris P. Punayan; Kristina Patriz Dela Cruz; Lindsay Clare D.L. Carandang; Ma. Exanil Plantig; Marc Edsel C. Ayes; Maria Rosario Singh-Vergeire; Maria Sofia L. Yangzon; Marielle M. Gamboa; Marissa Alejandria; Niña Francesca Bustamante; Razel Nikka M. Hao; Renato Jacinto Q. Mantaring; Rianna Patricia S. Cruz; Shiela Mae M. Araiza; Yvonne Valerie Austria; Zipporah Mariebelle R. Enriquez; Zyrrel V. Mollejon         |                 |                 |                 |                 |                 |                 |                 |                 |                 |                 |                 |                 |                 |                 |                 |                 |                 |                 |
| EPI_ISL_4715262 |                                                                                                                                                                                         |                                                                                                                                                                                         |                                                                                                                                                                                                                                                                                                                                                                                                                                                                                                                                                                                                                                                                                                                                                                                                                                                                                                                                                   |                 |                 |                 |                 |                 |                 |                 |                 |                 |                 |                 |                 |                 |                 |                 |                 |                 |                 |
| EPI_ISL_1094036 | DeRisi Lab, University of California, San Francisco                                                                                                                                     | DeRisi Lab, University of California, San Francisco                                                                                                                                     | Amy Kistler; Anthea Mitchell; Carina Marquet; Diane Havlir; Diane Jones; Douglas Black; Eric Chow; Gabriel Chamié; Genay Pilarowski; Grace Wang; IDeSeq Team; Jackie Martinez; James Peng; Jamin Liu; John Schrom; Jon Jacobo; Lucy Li; Luis Rubio; Manu Marchant; Matthew Laurie; Matthias Hapte-Selassie; Maya Petersen; Patrick Ayscue; Sabrina Mann; Sara Sunshine; Susana Rojas; Susy Rojas; Valerie Tulier-Laiwa; and Joseph DeRisi                                                                                                                                                                                                                                                                                                                                                                                                                                                                                                         |                 |                 |                 |                 |                 |                 |                 |                 |                 |                 |                 |                 |                 |                 |                 |                 |                 |                 |
| EPI_ISL_2158091 |                                                                                                                                                                                         |                                                                                                                                                                                         |                                                                                                                                                                                                                                                                                                                                                                                                                                                                                                                                                                                                                                                                                                                                                                                                                                                                                                                                                   |                 |                 |                 |                 |                 |                 |                 |                 |                 |                 |                 |                 |                 |                 |                 |                 |                 |                 |
| EPI_ISL_2522093 |                                                                                                                                                                                         |                                                                                                                                                                                         |                                                                                                                                                                                                                                                                                                                                                                                                                                                                                                                                                                                                                                                                                                                                                                                                                                                                                                                                                   |                 |                 |                 |                 |                 |                 |                 |                 |                 |                 |                 |                 |                 |                 |                 |                 |                 |                 |
| EPI_ISL_7552868 |                                                                                                                                                                                         |                                                                                                                                                                                         |                                                                                                                                                                                                                                                                                                                                                                                                                                                                                                                                                                                                                                                                                                                                                                                                                                                                                                                                                   |                 |                 |                 |                 |                 |                 |                 |                 |                 |                 |                 |                 |                 |                 |                 |                 |                 |                 |
| EPI_ISL_1662652 | Delaware Public Health Lab                                                                                                                                                              | Delaware Public Health Lab                                                                                                                                                              | Rebecca Savage                                                                                                                                                                                                                                                                                                                                                                                                                                                                                                                                                                                                                                                                                                                                                                                                                                                                                                                                    |                 |                 |                 |                 |                 |                 |                 |                 |                 |                 |                 |                 |                 |                 |                 |                 |                 |                 |
| EPI_ISL_693750  | Delaware Public Health Laboratory                                                                                                                                                       | Delaware Public Health Laboratory                                                                                                                                                       | Gregory Hovan                                                                                                                                                                                                                                                                                                                                                                                                                                                                                                                                                                                                                                                                                                                                                                                                                                                                                                                                     |                 |                 |                 |                 |                 |                 |                 |                 |                 |                 |                 |                 |                 |                 |                 |                 |                 |                 |
| EPI_ISL_7465599 | Department Medical Microbiology, Baerum Hospital, Vestre Viken Health Trust                                                                                                             | Norwegian Institute of Public Health, Department of Virology                                                                                                                            | Atiya R Ali; Debecch Nadia; Engebretsen Serina Beate; Garcia Llorente Ignacio; Hilde Elshaug; Hilde Vollan; Jon Bråte; Kamilla Heddeland Instefjord; Karoline Bragstad; Kathrine Stone-Johansen; Line Victoria Moen; Marie Paulsen Madsen; Olav Hungnes; Pedersen Benedikte Nenes; Rasmus Riis Kopperud                                                                                                                                                                                                                                                                                                                                                                                                                                                                                                                                                                                                                                           |                 |                 |                 |                 |                 |                 |                 |                 |                 |                 |                 |                 |                 |                 |                 |                 |                 |                 |
| EPI_ISL_7779697 |                                                                                                                                                                                         |                                                                                                                                                                                         |                                                                                                                                                                                                                                                                                                                                                                                                                                                                                                                                                                                                                                                                                                                                                                                                                                                                                                                                                   |                 |                 |                 |                 |                 |                 |                 |                 |                 |                 |                 |                 |                 |                 |                 |                 |                 |                 |
| EPI_ISL_3804075 | Department for Virology, Molecular Biology and Genome Research, R. G. Lugar Center for Public Health Research, National Center for Disease Control and Public Health (NCDC) of Georgia. | Department for Virology, Molecular Biology and Genome Research, R. G. Lugar Center for Public Health Research, National Center for Disease Control and Public Health (NCDC) of Georgia. | Adam Kotorashvili; Amiran Gamkrelidze.; Ana Pakkiauri; Ann Machabishvili; Anna Kasradze; Davit Tsaguria; Ekaterine Khamaladze; Ekaterine Zangaladze; Ekaterine Zhghenti; Giorgi Gogoladze; Giorgi Tomashvili; Gvantsa Brachvili; Gvantsa Chanturia; Irma Burjanadze; Ketevan Sidamonidze; Khutuna Zakhashvili; Lela Sabadze; Lela Urushadze; Magda Dgebudze; Maia Alkhashvili; Mari Gavashelidze; Mariam Zakalashvili; Marine Murtskhvaladze; Meri Pantsulia; Nato Kotaria; Nino Berishvili; Paata Imnadze; Roena Sukhlishvili; Salome Javashvili; Tamar Jashishvili; Tata Imnadze; Tea Tvedoradze                                                                                                                                                                                                                                                                                                                                                |                 |                 |                 |                 |                 |                 |                 |                 |                 |                 |                 |                 |                 |                 |                 |                 |                 |                 |
| EPI_ISL_2109001 | Department für Labormedizin Abteilung III Bereich Molekulare Diagnostik Universitätsklinikum Halle(Saale)                                                                               | Robert Koch Institute                                                                                                                                                                   |                                                                                                                                                                                                                                                                                                                                                                                                                                                                                                                                                                                                                                                                                                                                                                                                                                                                                                                                                   |                 |                 |                 |                 |                 |                 |                 |                 |                 |                 |                 |                 |                 |                 |                 |                 |                 |                 |
| EPI_ISL_8219657 | Department für Labormedizin Abteilung III Bereich Molekulare Diagnostik Universitätsklinikum Halle(Saale)                                                                               | Robert Koch Institute                                                                                                                                                                   |                                                                                                                                                                                                                                                                                                                                                                                                                                                                                                                                                                                                                                                                                                                                                                                                                                                                                                                                                   |                 |                 |                 |                 |                 |                 |                 |                 |                 |                 |                 |                 |                 |                 |                 |                 |                 |                 |
| EPI_ISL_2411929 | EPI_ISL_2413188                                                                                                                                                                         | EPI_ISL_2413608                                                                                                                                                                         | EPI_ISL_2415108                                                                                                                                                                                                                                                                                                                                                                                                                                                                                                                                                                                                                                                                                                                                                                                                                                                                                                                                   | EPI_ISL_2418158 | EPI_ISL_2668182 | EPI_ISL_2668365 | EPI_ISL_2669331 | EPI_ISL_2670500 | EPI_ISL_2679884 | EPI_ISL_2683685 | EPI_ISL_2684039 | EPI_ISL_2747572 | EPI_ISL_2784599 | EPI_ISL_2784610 | EPI_ISL_2819263 | EPI_ISL_2838184 | EPI_ISL_2896745 | EPI_ISL_2932837 | EPI_ISL_2932850 | EPI_ISL_2932865 | EPI_ISL_2932954 |
| EPI_ISL_2963532 | EPI_ISL_2990201                                                                                                                                                                         | EPI_ISL_2993022                                                                                                                                                                         | EPI_ISL_3028399                                                                                                                                                                                                                                                                                                                                                                                                                                                                                                                                                                                                                                                                                                                                                                                                                                                                                                                                   | EPI_ISL_3028660 | EPI_ISL_3029293 | EPI_ISL_3053481 | EPI_ISL_3053494 | EPI_ISL_3072493 | EPI_ISL_3072534 | EPI_ISL_3072662 | EPI_ISL_3073010 | EPI_ISL_3073182 | EPI_ISL_3073354 | EPI_ISL_3074480 | EPI_ISL_3141575 | EPI_ISL_3141593 | EPI_ISL_3141892 | EPI_ISL_3142477 | EPI_ISL_3163405 | EPI_ISL_3163602 | EPI_ISL_3228586 |
| EPI_ISL_3228690 | EPI_ISL_3229071                                                                                                                                                                         | EPI_ISL_3252484                                                                                                                                                                         | EPI_ISL_3279772                                                                                                                                                                                                                                                                                                                                                                                                                                                                                                                                                                                                                                                                                                                                                                                                                                                                                                                                   | EPI_ISL_3340043 | EPI_ISL_3340616 | EPI_ISL_3352707 | EPI_ISL_3357911 | EPI_ISL_3383763 | EPI_ISL_3417546 | EPI_ISL_3449050 | EPI_ISL_3463130 | EPI_ISL_3530246 | EPI_ISL_3530805 | EPI_ISL_3531388 | EPI_ISL_3567238 | EPI_ISL_3567672 | EPI_ISL_3631997 | EPI_ISL_3632651 | EPI_ISL_3633241 | EPI_ISL_3724893 | EPI_ISL_3725098 |
| EPI_ISL_3725323 | EPI_ISL_3840379                                                                                                                                                                         | EPI_ISL_3840426                                                                                                                                                                         | EPI_ISL_3903856                                                                                                                                                                                                                                                                                                                                                                                                                                                                                                                                                                                                                                                                                                                                                                                                                                                                                                                                   | EPI_ISL_3904047 | EPI_ISL_3916629 | EPI_ISL_3949105 | EPI_ISL_3989596 | EPI_ISL_3989807 | EPI_ISL_3990134 | EPI_ISL_4050421 | EPI_ISL_4109838 | EPI_ISL_4109927 | EPI_ISL_4199835 | EPI_ISL_4200064 | EPI_ISL_4257454 | EPI_ISL_4257682 | EPI_ISL_4257729 | EPI_ISL_4258005 | EPI_ISL_4258005 | EPI_ISL_4303613 | EPI_ISL_4448789 |
| EPI_ISL_4351281 | EPI_ISL_4551538                                                                                                                                                                         | EPI_ISL_4625533                                                                                                                                                                         | EPI_ISL_4625757                                                                                                                                                                                                                                                                                                                                                                                                                                                                                                                                                                                                                                                                                                                                                                                                                                                                                                                                   | EPI_ISL_4626084 | EPI_ISL_4643366 | EPI_ISL_4643610 | EPI_ISL_4943111 | EPI_ISL_5140621 | EPI_ISL_5324511 | EPI_ISL_5325623 | EPI_ISL_5363056 | EPI_ISL_5363106 | EPI_ISL_5363245 | EPI_ISL_5446552 | EPI_ISL_5462568 | EPI_ISL_5537221 | EPI_ISL_5594503 | EPI_ISL_5638339 | EPI_ISL_5638874 | EPI_ISL_5733428 | EPI_ISL_5803308 |
| EPI_ISL_5803484 | EPI_ISL_5856542                                                                                                                                                                         | EPI_ISL_5856681                                                                                                                                                                         | EPI_ISL_5857228                                                                                                                                                                                                                                                                                                                                                                                                                                                                                                                                                                                                                                                                                                                                                                                                                                                                                                                                   | EPI_ISL_5857832 | EPI_ISL_5883320 | EPI_ISL_5916215 | EPI_ISL_5916773 | EPI_ISL_6014694 | EPI_ISL_6014950 | EPI_ISL_6126446 | EPI_ISL_6182928 | EPI_ISL_6231359 | EPI_ISL_6239312 | EPI_ISL_6242246 | EPI_ISL_6242426 | EPI_ISL_6243508 | EPI_ISL_6243514 | EPI_ISL_6247972 | EPI_ISL_6323514 | EPI_ISL_6323659 | EPI_ISL_6437742 |
| EPI_ISL_6437795 | EPI_ISL_6505518                                                                                                                                                                         | EPI_ISL_6506057                                                                                                                                                                         | EPI_ISL_6609162                                                                                                                                                                                                                                                                                                                                                                                                                                                                                                                                                                                                                                                                                                                                                                                                                                                                                                                                   | EPI_ISL_6609098 | EPI_ISL_6609600 | EPI_ISL_6609724 | EPI_ISL_6678851 | EPI_ISL_6679373 | EPI_ISL_6679913 | EPI_ISL_6682219 | EPI_ISL_6682499 | EPI_ISL_6829634 | EPI_ISL_6830180 | EPI_ISL_6830264 | EPI_ISL_6830388 | EPI_ISL_6831156 | EPI_ISL_6848148 | EPI_ISL_6848578 | EPI_ISL_6849078 | EPI_ISL_6849085 |                 |
| EPI_ISL_6849470 | EPI_ISL_6849522                                                                                                                                                                         | EPI_ISL_6878981                                                                                                                                                                         | EPI_ISL_6879178                                                                                                                                                                                                                                                                                                                                                                                                                                                                                                                                                                                                                                                                                                                                                                                                                                                                                                                                   | EPI_ISL_6880879 | EPI_ISL_6894364 | EPI_ISL_6935325 | EPI_ISL_6964185 | EPI_ISL_6964895 | EPI_ISL_7193810 | EPI_ISL_7194139 | EPI_ISL_7194428 | EPI_ISL_7194826 | EPI_ISL_7271714 | EPI_ISL_7272458 | EPI_ISL_7276500 | EPI_ISL_7277445 | EPI_ISL_7278359 |                 |                 |                 |                 |
| EPI_ISL_7278767 | EPI_ISL_7279924                                                                                                                                                                         | EPI_ISL_7280135                                                                                                                                                                         | EPI_ISL_7281914                                                                                                                                                                                                                                                                                                                                                                                                                                                                                                                                                                                                                                                                                                                                                                                                                                                                                                                                   | EPI_ISL_7282559 | EPI_ISL_7287940 | EPI_ISL_7526651 | EPI_ISL_7594998 | EPI_ISL_7595198 | EPI_ISL_7596187 | EPI_ISL_7600047 | EPI_ISL_7601753 | EPI_ISL_7602244 | EPI_ISL_7639882 | EPI_ISL_7645321 | EPI_ISL_7645321 | EPI_ISL_7647056 | EPI_ISL_7647154 | EPI_ISL_7689656 | EPI_ISL_7729860 | EPI_ISL_7730395 | EPI_ISL_7730534 |
| EPI_ISL_7731150 | EPI_ISL_7731237                                                                                                                                                                         | EPI_ISL_7731486                                                                                                                                                                         | EPI_ISL_7731867                                                                                                                                                                                                                                                                                                                                                                                                                                                                                                                                                                                                                                                                                                                                                                                                                                                                                                                                   | EPI_ISL_7731962 | EPI_ISL_7731962 | EPI_ISL_7732210 | EPI_ISL_7901710 | EPI_ISL_7903254 | EPI_ISL_7903818 | EPI_ISL_7906754 | EPI_ISL_7909828 | EPI_ISL_7911417 | EPI_ISL_7913758 | EPI_ISL_7915060 | EPI_ISL_7915988 | EPI_ISL_7916400 | EPI_ISL_7918007 | EPI_ISL_7968065 |                 |                 |                 |
| EPI_ISL_8001933 | EPI_ISL_8001940                                                                                                                                                                         | EPI_ISL_8002236                                                                                                                                                                         | EPI_ISL_8002761                                                                                                                                                                                                                                                                                                                                                                                                                                                                                                                                                                                                                                                                                                                                                                                                                                                                                                                                   | EPI_ISL_8003631 | EPI_ISL_8134973 | EPI_ISL_8137940 | EPI_ISL_8138960 | EPI_ISL_8345305 | EPI_ISL_8345310 | EPI_ISL_8345310 | EPI_ISL_8579172 | EPI_ISL_8612740 | EPI_ISL_8658769 | EPI_ISL_8706227 | EPI_ISL_8706268 | EPI_ISL_8805638 | EPI_ISL_8887131 | EPI_ISL_8925146 | EPI_ISL_9009678 | EPI_ISL_9068575 | EPI_ISL_9121704 |
| EPI_ISL_9122167 | EPI_ISL_9123498                                                                                                                                                                         | EPI_ISL_9124046                                                                                                                                                                         | EPI_ISL_9124564                                                                                                                                                                                                                                                                                                                                                                                                                                                                                                                                                                                                                                                                                                                                                                                                                                                                                                                                   | EPI_ISL_9163448 | EPI_ISL_9168676 | EPI_ISL_9269216 | EPI_ISL_9358323 | EPI_ISL_9364032 | EPI_ISL_9409292 | EPI_ISL_9446694 | EPI_ISL_9451631 | EPI_ISL_9455084 | EPI_ISL_9496477 | EPI_ISL_9501185 | EPI_ISL_9502640 |                 |                 |                 |                 |                 |                 |
| see above       | Department of Bacteria, Parasites and Fungi, Statens Serum Institut, Copenhagen, Denmark                                                                                                | Statens Serum Institut Bioinformatics and Microbial Genomics                                                                                                                            | Danish Covid-19 Genome Consortium                                                                                                                                                                                                                                                                                                                                                                                                                                                                                                                                                                                                                                                                                                                                                                                                                                                                                                                 |                 |                 |                 |                 |                 |                 |                 |                 |                 |                 |                 |                 |                 |                 |                 |                 |                 |                 |
| EPI_ISL_9446449 | Department of Biochemistry, Cell and Molecular Biology, West African Centre for Cell Biology of Infectious Pathogens (WACCBIP), University of Ghana                                     | Department of Biochemistry, Cell and Molecular Biology, West African Centre for Cell Biology of Infectious Pathogens (WACCBIP), University of Ghana                                     | Adusei-Poku, M.; Amenga-Etego; Ampofo; Amuzu; Asante, I.; Awandare; Bediako, Y.; Bonney; Bonney, E.; C.M.; D.S.; E.B.; G.A.; J.H.; J.K.; J.M.; L.N.; Morang'a; N.T.; Ndam; Ngoi; Odoom; Ofori-Boadu, L.; Quansah; Quashie, P.; Saïid, S.; Tei-Maya, F.; W.K.                                                                                                                                                                                                                                                                                                                                                                                                                                                                                                                                                                                                                                                                                      |                 |                 |                 |                 |                 |                 |                 |                 |                 |                 |                 |                 |                 |                 |                 |                 |                 |                 |
| EPI_ISL_666879  | Department of Clinical Microbiology                                                                                                                                                     | GIGA Medical Genomics                                                                                                                                                                   | Bouchra Boujeima; Claire Gourzonès; Cécile Meex; Gilles Darcis; Justine Defêche; Keith Durkin; Laurent Gillet; Maria Artes; Marie-Pierre Hayette; Michel Moutschen; Nadine Cambisano; Nathalie Renotte; Olivier Ek; Pierrette Melin; Raphaël Boreux; Sébastien Bontems; Vincent Bouts                                                                                                                                                                                                                                                                                                                                                                                                                                                                                                                                                                                                                                                             |                 |                 |                 |                 |                 |                 |                 |                 |                 |                 |                 |                 |                 |                 |                 |                 |                 |                 |
| EPI_ISL_4489602 |                                                                                                                                                                                         |                                                                                                                                                                                         |                                                                                                                                                                                                                                                                                                                                                                                                                                                                                                                                                                                                                                                                                                                                                                                                                                                                                                                                                   |                 |                 |                 |                 |                 |                 |                 |                 |                 |                 |                 |                 |                 |                 |                 |                 |                 |                 |
| EPI_ISL_4489614 |                                                                                                                                                                                         |                                                                                                                                                                                         |                                                                                                                                                                                                                                                                                                                                                                                                                                                                                                                                                                                                                                                                                                                                                                                                                                                                                                                                                   |                 |                 |                 |                 |                 |                 |                 |                 |                 |                 |                 |                 |                 |                 |                 |                 |                 |                 |
| EPI_ISL_7193771 | Department of Clinical Microbiology and Center for Genomic Medicine, Rigshospitalet, Copenhagen, Denmark                                                                                | Statens Serum Institut Bioinformatics and Microbial Genomics                                                                                                                            | Danish Covid-19 Genome Consortium                                                                                                                                                                                                                                                                                                                                                                                                                                                                                                                                                                                                                                                                                                                                                                                                                                                                                                                 |                 |                 |                 |                 |                 |                 |                 |                 |                 |                 |                 |                 |                 |                 |                 |                 |                 |                 |
| EPI_ISL_5761115 | Department of Health Science, Gifu Prefectural Research Institute for Health and Environmental Sciences                                                                                 | Gifu Prefectural Research Institute for Health and Environmental Sciences                                                                                                               | Kentaro Itokawa; Makoto Kuroda; Masahiro Nishioka; Masanori Hashino; Rina Tanaka; Takuya Mizuno; Tomohiro Yamaguchi; Tsyuyoshi Kuzuguchi; Tsyuyoshi Sekizuka; Yoshihiro Kameyama; Yuta Uramoto                                                                                                                                                                                                                                                                                                                                                                                                                                                                                                                                                                                                                                                                                                                                                    |                 |                 |                 |                 |                 |                 |                 |                 |                 |                 |                 |                 |                 |                 |                 |                 |                 |                 |
| EPI_ISL_2713089 | Department of Health Technology and Informatics, The Hong Kong Polytechnic University                                                                                                   | Department of Health Technology and Informatics, The Hong Kong Polytechnic University                                                                                                   | Alan Ka-Lun Wu; Alex Yat-Man Ho; Barry Kin-Chung Wong; Chloe Toi-Mei Chan; David Ho-Kung Shum; Denise Sze-Hang Wong; Gilman Kit-Hang Siu; Hiu-Yin Lau; Hoi-Ching Jim; Ivan Tak-Fai Wong; Jake Siu-Lun Leung; Kam-Tong Yip; Kenneth Siu-Sing Leung; Kingsley King-Gee Tam; Kitty Sau-Chun Fung; Kristine Luk; Lam-Kwong Lee; Mi-Randa Chung-Yee Yau; Sandy Ka-Yee Chau; Shee Ping Yip; Tak-Lun Que; Timothy Ting-Leung Ng; Wing Cheong Yau; Wing-Hei To; Yvette Wai-Man Lai                                                                                                                                                                                                                                                                                                                                                                                                                                                                        |                 |                 |                 |                 |                 |                 |                 |                 |                 |                 |                 |                 |                 |                 |                 |                 |                 |                 |
| EPI_ISL_1168866 | EPI_ISL_1942045                                                                                                                                                                         | EPI_ISL_2810907                                                                                                                                                                         | EPI_ISL_3872675                                                                                                                                                                                                                                                                                                                                                                                                                                                                                                                                                                                                                                                                                                                                                                                                                                                                                                                                   | EPI_ISL_3873245 | EPI_ISL_4646170 | EPI_ISL_8110152 |                 |                 |                 |                 |                 |                 |                 |                 |                 |                 |                 |                 |                 |                 |                 |
| see above       | Department of Infectious Diseases, Kobe Institute of Health                                                                                                                             | Department of Infectious Diseases, Kobe Institute of Health                                                                                                                             | Kentaro Itokawa; Makoto Kuroda; Masanori Hashino; Noriko Nakanishi; Rina Tanaka; Ryohei Nomoto; Tomotada Iwamoto; Tsyuyoshi Sekizuka                                                                                                                                                                                                                                                                                                                                                                                                                                                                                                                                                                                                                                                                                                                                                                                                              |                 |                 |                 |                 |                 |                 |                 |                 |                 |                 |                 |                 |                 |                 |                 |                 |                 |                 |





|                                                                                                                                                                                                                                                                                                                                                                                                                                                                                                                                                                                                                                                                                                                                                                                                                                                                                                                                                                                                                                                                                                                                                                                                                                                                                                                                                                                                                                                                                                                                                                                                                                                                                                                                                                                                                                                                                                       |                                                                                                                                        |                                                                                                                                                                                                                                                                                                                                                                                                                                                                                                                                  |                                                                                                                                                                                                                                                                                                                                                                                                                                                                                                                                                                                                                                                                                                                                                                                                                                                                                                                                                                                           |
|-------------------------------------------------------------------------------------------------------------------------------------------------------------------------------------------------------------------------------------------------------------------------------------------------------------------------------------------------------------------------------------------------------------------------------------------------------------------------------------------------------------------------------------------------------------------------------------------------------------------------------------------------------------------------------------------------------------------------------------------------------------------------------------------------------------------------------------------------------------------------------------------------------------------------------------------------------------------------------------------------------------------------------------------------------------------------------------------------------------------------------------------------------------------------------------------------------------------------------------------------------------------------------------------------------------------------------------------------------------------------------------------------------------------------------------------------------------------------------------------------------------------------------------------------------------------------------------------------------------------------------------------------------------------------------------------------------------------------------------------------------------------------------------------------------------------------------------------------------------------------------------------------------|----------------------------------------------------------------------------------------------------------------------------------------|----------------------------------------------------------------------------------------------------------------------------------------------------------------------------------------------------------------------------------------------------------------------------------------------------------------------------------------------------------------------------------------------------------------------------------------------------------------------------------------------------------------------------------|-------------------------------------------------------------------------------------------------------------------------------------------------------------------------------------------------------------------------------------------------------------------------------------------------------------------------------------------------------------------------------------------------------------------------------------------------------------------------------------------------------------------------------------------------------------------------------------------------------------------------------------------------------------------------------------------------------------------------------------------------------------------------------------------------------------------------------------------------------------------------------------------------------------------------------------------------------------------------------------------|
| EPI_ISL_1920273,<br>EPI_ISL_1920313                                                                                                                                                                                                                                                                                                                                                                                                                                                                                                                                                                                                                                                                                                                                                                                                                                                                                                                                                                                                                                                                                                                                                                                                                                                                                                                                                                                                                                                                                                                                                                                                                                                                                                                                                                                                                                                                   | Diagnostyka. Laboratoria Medyczne.                                                                                                     | ViroGenetics - BSL3 Laboratory of Virology, Malopolska Centre of Biotechnology, Jagiellonian University;                                                                                                                                                                                                                                                                                                                                                                                                                         | Gromowski, T.; Kowalski, M.; Labaj; Maciej Kosinski; Mazur-Panasiuk, N.; Natalia Derewonko; P.P.; Pyrc, K.; Rabalski L.; Rogalska-Kupiec M.; Swadzba J.; Sylwia Januszczak; Szulc, P.                                                                                                                                                                                                                                                                                                                                                                                                                                                                                                                                                                                                                                                                                                                                                                                                     |
| EPI_ISL_6641717                                                                                                                                                                                                                                                                                                                                                                                                                                                                                                                                                                                                                                                                                                                                                                                                                                                                                                                                                                                                                                                                                                                                                                                                                                                                                                                                                                                                                                                                                                                                                                                                                                                                                                                                                                                                                                                                                       | Diagnostyka. Laboratoria Medyczne.                                                                                                     | ViroGenetics - BSL3 Laboratory of Virology, Malopolska Centre of Biotechnology, Jagiellonian University; Z. genXone SA, Research & Development Laboratory                                                                                                                                                                                                                                                                                                                                                                        | Aleksandra Gidlewicz; Anna Brylak; Gromowski, T.; Grzegorz Nowicki; Jakub Grabowski; Kowalski, M.; Labaj; Maciej Sykulis; Mazur-Panasiuk, N.; Michał Kaszuba; Natalia Drwesa-Matejska; P.P.; Pyrc, K.; Rustan Herasymenko; Sylwia Januszczak; Szulc, P.; Wydmanski, W.; Łukasz Krych                                                                                                                                                                                                                                                                                                                                                                                                                                                                                                                                                                                                                                                                                                      |
| EPI_ISL_5533293                                                                                                                                                                                                                                                                                                                                                                                                                                                                                                                                                                                                                                                                                                                                                                                                                                                                                                                                                                                                                                                                                                                                                                                                                                                                                                                                                                                                                                                                                                                                                                                                                                                                                                                                                                                                                                                                                       | Dianalabs SA                                                                                                                           | Genesupport                                                                                                                                                                                                                                                                                                                                                                                                                                                                                                                      | Geraldine Jost; Katia Jaton; Nadia Liassine; Tanguy ARAUD                                                                                                                                                                                                                                                                                                                                                                                                                                                                                                                                                                                                                                                                                                                                                                                                                                                                                                                                 |
| EPI_ISL_1147745,<br>EPI_ISL_2129346                                                                                                                                                                                                                                                                                                                                                                                                                                                                                                                                                                                                                                                                                                                                                                                                                                                                                                                                                                                                                                                                                                                                                                                                                                                                                                                                                                                                                                                                                                                                                                                                                                                                                                                                                                                                                                                                   | Dianovis GmbH Greiz                                                                                                                    | Robert Koch Institute                                                                                                                                                                                                                                                                                                                                                                                                                                                                                                            |                                                                                                                                                                                                                                                                                                                                                                                                                                                                                                                                                                                                                                                                                                                                                                                                                                                                                                                                                                                           |
| EPI_ISL_751197<br>EPI_ISL_3160147                                                                                                                                                                                                                                                                                                                                                                                                                                                                                                                                                                                                                                                                                                                                                                                                                                                                                                                                                                                                                                                                                                                                                                                                                                                                                                                                                                                                                                                                                                                                                                                                                                                                                                                                                                                                                                                                     | Dienststelle Gesundheit und Sport Kanton Luzern<br>Dinas Kesehatan Provinsi Kalimantan Timur                                           | Institute of Medical Virology, University of Zurich<br>Eijkman Institute for Molecular Biology, National Research and Innovation Agency; National Institute of Health Research and Development                                                                                                                                                                                                                                                                                                                                   | Alexandra Trkola; Claudia Schmutz; Eva Spieler; Gabriela Ziltener; Jürg Böni; Christine Bunting; Maryam Zaheri; Michael Huber; Stefan Schmutz; Verena Kufner<br>Amin Soebandrio; Edison Johar; Frlisista A Yudhaputri; Hana Aparsi Pawestri; Hidayat Trimarsanto; Iskandar Adnan; Khin Saw Myint; Lidwina Priilani; Lydia V. Panggalo; Muhammad Rezki Rasyak; Safarina G Malik; Subangkit; Sukma Oktavianthi; Vivi Setiawaty; Willy Agustine                                                                                                                                                                                                                                                                                                                                                                                                                                                                                                                                              |
| EPI_ISL_8748634<br>EPI_ISL_5058623                                                                                                                                                                                                                                                                                                                                                                                                                                                                                                                                                                                                                                                                                                                                                                                                                                                                                                                                                                                                                                                                                                                                                                                                                                                                                                                                                                                                                                                                                                                                                                                                                                                                                                                                                                                                                                                                    | Dirección Regional de Salud (DIRESA) Amazonas<br>District Hospital                                                                     | Instituto de Enfermedades Tropicales UNTRM<br>CFDF                                                                                                                                                                                                                                                                                                                                                                                                                                                                               | Angélica Vigili; Cecilia Pajuelo; Julio Sandoval; Junior Monteza; Lizandro González; Luis Rojas; Rafael Tapia; Stella Chenet<br>Arunkumar Karunanidhi; Ashwin Dalat; Asmita Gupta; Divya Vashisht; Murali Bashyam; Nagamani Kammili; Vinay Donipadi                                                                                                                                                                                                                                                                                                                                                                                                                                                                                                                                                                                                                                                                                                                                       |
| EPI_ISL_747291, EPI_ISL_760075, EPI_ISL_959533, EPI_ISL_1489974, EPI_ISL_1934829, EPI_ISL_1934834, EPI_ISL_1936574, EPI_ISL_1936625, EPI_ISL_3544651, EPI_ISL_3544992, EPI_ISL_3545151, EPI_ISL_3674775, EPI_ISL_3772917, EPI_ISL_5634702, EPI_ISL_5634702, EPI_ISL_6014014, EPI_ISL_6747722, EPI_ISL_7692395, EPI_ISL_7692395, EPI_ISL_7692743, EPI_ISL_7693199, EPI_ISL_7793096, EPI_ISL_7793302,<br>EPI_ISL_7793382, EPI_ISL_7914819, EPI_ISL_8006946, EPI_ISL_8192974, EPI_ISL_8403246, EPI_ISL_8403540, EPI_ISL_8403654                                                                                                                                                                                                                                                                                                                                                                                                                                                                                                                                                                                                                                                                                                                                                                                                                                                                                                                                                                                                                                                                                                                                                                                                                                                                                                                                                                          | Division of Emerging Infectious Diseases, Bureau of Infectious Diseases Diagnosis Control, Korea Disease Control and Prevention Agency | Ae Kyung Park; Chae Young Lee; Chaeyoung Lee; Eun-Jin Kim; Heui Man Kim; Hyuck Jin Lee; Il-Hwan Kim; Jeong-Ah Kim; Jeong-Min Kim; Jin Sun Jo; Namjoo Lee; Sang Hee Woo                                                                                                                                                                                                                                                                                                                                                           |                                                                                                                                                                                                                                                                                                                                                                                                                                                                                                                                                                                                                                                                                                                                                                                                                                                                                                                                                                                           |
| see above                                                                                                                                                                                                                                                                                                                                                                                                                                                                                                                                                                                                                                                                                                                                                                                                                                                                                                                                                                                                                                                                                                                                                                                                                                                                                                                                                                                                                                                                                                                                                                                                                                                                                                                                                                                                                                                                                             | Division of Emerging Infectious Diseases, Bureau of Infectious Diseases Diagnosis Control, Korea Disease Control and Prevention Agency |                                                                                                                                                                                                                                                                                                                                                                                                                                                                                                                                  |                                                                                                                                                                                                                                                                                                                                                                                                                                                                                                                                                                                                                                                                                                                                                                                                                                                                                                                                                                                           |
| EPI_ISL_583747,<br>EPI_ISL_583841                                                                                                                                                                                                                                                                                                                                                                                                                                                                                                                                                                                                                                                                                                                                                                                                                                                                                                                                                                                                                                                                                                                                                                                                                                                                                                                                                                                                                                                                                                                                                                                                                                                                                                                                                                                                                                                                     | Dr. Gernot Walder GmbH                                                                                                                 | Berghaler laboratory, CeMM Research Center for Molecular Medicine of the Austrian Academy of Sciences                                                                                                                                                                                                                                                                                                                                                                                                                            | Adi Steinrigl; Alexander Lercher; Alexandra Popa; Andreas Berghaler; Benedikt Agerer; Christian Paar; Christoph Bock; Daniela Schmid; Dorothee von Laer; Elisabeth Puchhammer-Stoeckl; Franz Allerberger; Gernot Walder; Gregor Hörmann; Guenter Weiss; Gunther Vogl; Henrique Colaco; Jakob-Wendelin Genger; Jan Laïne; Judith Aberle; Kinga Rigler-Hohenwarter; Lukas Endler; Manfred Nairz; Mark Smyth; Martin Senekowitsch; Michael Schuster; Peter Hufnagl; Peter Obrist; Rainer Gattringer; Sabine Sussitz-Rack; Stephan Aberle; Thomas Penz; Wegene Borena                                                                                                                                                                                                                                                                                                                                                                                                                         |
| EPI_ISL_5566815,<br>EPI_ISL_5570935                                                                                                                                                                                                                                                                                                                                                                                                                                                                                                                                                                                                                                                                                                                                                                                                                                                                                                                                                                                                                                                                                                                                                                                                                                                                                                                                                                                                                                                                                                                                                                                                                                                                                                                                                                                                                                                                   | Dr. Jorge P. Royeca Hospital                                                                                                           | Philippine Genome Center                                                                                                                                                                                                                                                                                                                                                                                                                                                                                                         | Alethea R. de Guzman; Alyssa Joyce E. Telles; Anna Ong-Lim; Arienne A. Zamora; Benedict A. Maralit; Carlo M. Lapid; Celia Carlos; Cynthia P. Saloma; Devon Ray Pacial; Diomedes A. Cariño; Edsel Maurice Salvana; El King D. Morado; Elcid Aaron R. Pangilinan; Eva Maria Cutiungco-de la Paz; Francis A. Tablizo; Henrietta Marie Rodriguez; Jaime C. Montoya; Jan Michael C. Yap; Jarvin E. Nipales; Jo-Hannah S. Llames; John Michael Egana; John Q. Wong; Joshua Gregor A. Dizon; Joshua Jose Endozo; Juan Antonio R. Magalang; Karol Sophia Agape R. Padilla; Kris P. Punayan; Kristina Patriz Dela Cruz; Lindsay Clare D.L. Carandang; Ma. Exanil Plantig; Marc Edsel C. Ayes; Maria Rosario Singh-Vergeire; Maria Sofia L. Yangzon; Marielle M. Gamboa; Marissa Alejandria; Niña Francesca Bustamante; Razel Nikka M. Hao; Renato Jacinto Q. Mantaring; Rianna Patricia S. Cruz; Shiela Mae M. Araiza; Yvonne Valerie Austria; Zipporah Mariebelle R. Enriquez; Zyreil V. Mollejon |
| EPI_ISL_5559756                                                                                                                                                                                                                                                                                                                                                                                                                                                                                                                                                                                                                                                                                                                                                                                                                                                                                                                                                                                                                                                                                                                                                                                                                                                                                                                                                                                                                                                                                                                                                                                                                                                                                                                                                                                                                                                                                       | Dr. Jose N. Rodriguez Memorial Hospital and Sanitarium (Tala)                                                                          | Philippine Genome Center                                                                                                                                                                                                                                                                                                                                                                                                                                                                                                         | Alethea R. de Guzman; Alyssa Joyce E. Telles; Anna Ong-Lim; Arienne A. Zamora; Benedict A. Maralit; Carlo M. Lapid; Celia Carlos; Cynthia P. Saloma; Devon Ray Pacial; Diomedes A. Cariño; Edsel Maurice Salvana; El King D. Morado; Elcid Aaron R. Pangilinan; Eva Maria Cutiungco-de la Paz; Francis A. Tablizo; Henrietta Marie Rodriguez; Jaime C. Montoya; Jan Michael C. Yap; Jarvin E. Nipales; Jo-Hannah S. Llames; John Michael Egana; John Q. Wong; Joshua Gregor A. Dizon; Joshua Jose Endozo; Juan Antonio R. Magalang; Karol Sophia Agape R. Padilla; Kris P. Punayan; Kristina Patriz Dela Cruz; Lindsay Clare D.L. Carandang; Ma. Exanil Plantig; Marc Edsel C. Ayes; Maria Rosario Singh-Vergeire; Maria Sofia L. Yangzon; Marielle M. Gamboa; Marissa Alejandria; Niña Francesca Bustamante; Razel Nikka M. Hao; Renato Jacinto Q. Mantaring; Rianna Patricia S. Cruz; Shiela Mae M. Araiza; Yvonne Valerie Austria; Zipporah Mariebelle R. Enriquez; Zyreil V. Mollejon |
| EPI_ISL_4717420,<br>EPI_ISL_5544644                                                                                                                                                                                                                                                                                                                                                                                                                                                                                                                                                                                                                                                                                                                                                                                                                                                                                                                                                                                                                                                                                                                                                                                                                                                                                                                                                                                                                                                                                                                                                                                                                                                                                                                                                                                                                                                                   | Dr. Rafael S. Tumbokon Memorial Hospital                                                                                               | Philippine Genome Center                                                                                                                                                                                                                                                                                                                                                                                                                                                                                                         | Alethea R. de Guzman; Anna Ong-Lim; Arienne A. Zamora; Benedict A. Maralit; Carlo M. Lapid; Celia Carlos; Cynthia P. Saloma; Devon Ray Pacial; Diomedes A. Cariño; Edsel Maurice Salvana; El King D. Morado; Elcid Aaron R. Pangilinan; Eva Maria Cutiungco-de la Paz; Francis A. Tablizo; Henrietta Marie Rodriguez; Jaime C. Montoya; Jan Michael C. Yap; Jarvin E. Nipales; Jo-Hannah S. Llames; John Michael Egana; John Q. Wong; Joshua Gregor A. Dizon; Joshua Jose Endozo; Juan Antonio R. Magalang; Karol Sophia Agape R. Padilla; Kris P. Punayan; Kristina Patriz Dela Cruz; Lindsay Clare D.L. Carandang; Ma. Exanil Plantig; Marc Edsel C. Ayes; Maria Rosario Singh-Vergeire; Maria Sofia L. Yangzon; Marielle M. Gamboa; Marissa Alejandria; Niña Francesca Bustamante; Razel Nikka M. Hao; Renato Jacinto Q. Mantaring; Rianna Patricia S. Cruz; Shiela Mae M. Araiza; Yvonne Valerie Austria; Zipporah Mariebelle R. Enriquez; Zyreil V. Mollejon                         |
| EPI_ISL_422689,<br>EPI_ISL_461276,<br>EPI_ISL_523278,<br>EPI_ISL_1311665,<br>EPI_ISL_8377362                                                                                                                                                                                                                                                                                                                                                                                                                                                                                                                                                                                                                                                                                                                                                                                                                                                                                                                                                                                                                                                                                                                                                                                                                                                                                                                                                                                                                                                                                                                                                                                                                                                                                                                                                                                                          | Dutch COVID-19 response team                                                                                                           | Erasmus Medical Center                                                                                                                                                                                                                                                                                                                                                                                                                                                                                                           | Anne van der Linden; Annetiek van der Eijk; Aura Timen; Bas Oude Munnink; Claudia Schapendonk; Corien Swaan; Corine Geurtsvankessel; David Nieuwenhuijs; Emmanuelle Munger; Irina Chestakova; Jeroen van Kampen; Jolanda Voermans; Madelief Molters; Manon Haverkate; Marion Koopmans; Marjan Boter; Mark Pronk; Mart Stein; Pascal Lexmond; Reina Sikkema; Richard Molenkamp; Sandra Kengne Kanga Mobou; Stefan van Nieuwkoop; Theo Bestebror; on behalf of the Dutch national COVID-19 response team.                                                                                                                                                                                                                                                                                                                                                                                                                                                                                   |
| EPI_ISL_1394713                                                                                                                                                                                                                                                                                                                                                                                                                                                                                                                                                                                                                                                                                                                                                                                                                                                                                                                                                                                                                                                                                                                                                                                                                                                                                                                                                                                                                                                                                                                                                                                                                                                                                                                                                                                                                                                                                       | Dutch COVID-19 response team                                                                                                           | Medical Microbiology, Maastricht University Medical Centre                                                                                                                                                                                                                                                                                                                                                                                                                                                                       | Brian van der Veer*; Carmen Reumkens; Christian Hoebe; Erik Beuken; Jozef Dingemans*; Lieke van Alphen; Paul Savelkoul                                                                                                                                                                                                                                                                                                                                                                                                                                                                                                                                                                                                                                                                                                                                                                                                                                                                    |
| EPI_ISL_728599, EPI_ISL_728679, EPI_ISL_823977, EPI_ISL_943371, EPI_ISL_943526, EPI_ISL_1014210, EPI_ISL_1035094, EPI_ISL_1035104, EPI_ISL_1035193, EPI_ISL_1090249, EPI_ISL_1165408, EPI_ISL_1165720, EPI_ISL_1232352, EPI_ISL_1232719, EPI_ISL_1232806, EPI_ISL_1232910, EPI_ISL_1288642, EPI_ISL_1289304, EPI_ISL_1369813, EPI_ISL_1371011, EPI_ISL_1371103, EPI_ISL_1371243, EPI_ISL_1456352, EPI_ISL_1457050, EPI_ISL_1457244, EPI_ISL_1457339, EPI_ISL_1457512, EPI_ISL_1596839, EPI_ISL_1705107, EPI_ISL_1791636, EPI_ISL_1792698, EPI_ISL_1961454, EPI_ISL_1961740, EPI_ISL_1962044, EPI_ISL_1962201, EPI_ISL_2093708, EPI_ISL_2094115, EPI_ISL_2217741, EPI_ISL_2302921, EPI_ISL_2302947, EPI_ISL_2303979, EPI_ISL_2405428, EPI_ISL_2405497, EPI_ISL_2406261, EPI_ISL_2474726, EPI_ISL_2475023, EPI_ISL_2475538, EPI_ISL_2609643, EPI_ISL_2610465, EPI_ISL_2610688, EPI_ISL_2672534, EPI_ISL_2673099, EPI_ISL_2787537, EPI_ISL_3057312, EPI_ISL_3136982, EPI_ISL_3137004, EPI_ISL_3258297, EPI_ISL_3389743, EPI_ISL_3389914, EPI_ISL_3390149, EPI_ISL_3733084, EPI_ISL_3733904, EPI_ISL_3737112, EPI_ISL_3917868, EPI_ISL_3919086, EPI_ISL_3919159, EPI_ISL_4076371, EPI_ISL_4076446, EPI_ISL_4076976, EPI_ISL_4399968, EPI_ISL_4400050, EPI_ISL_4401564, EPI_ISL_4401651, EPI_ISL_4401884, EPI_ISL_4544257, EPI_ISL_4544297, EPI_ISL_4838254, EPI_ISL_4992468, EPI_ISL_4993043, EPI_ISL_4994193, EPI_ISL_4996130, EPI_ISL_5207806, EPI_ISL_5429689, EPI_ISL_5430130, EPI_ISL_5430776, EPI_ISL_5820485, EPI_ISL_5917379, EPI_ISL_5976847, EPI_ISL_6240065, EPI_ISL_6852670, EPI_ISL_6852690, EPI_ISL_6852733, EPI_ISL_6852779, EPI_ISL_6853558, EPI_ISL_6853623, EPI_ISL_6854057, EPI_ISL_7470786, EPI_ISL_7470786, EPI_ISL_7748714, EPI_ISL_7748714, EPI_ISL_7785467, EPI_ISL_7785522, EPI_ISL_7785839, EPI_ISL_8015737, EPI_ISL_8021723, EPI_ISL_8460765, EPI_ISL_8460885, EPI_ISL_8586852 | National Institute for Public Health and the Environment (RIVM)                                                                        | Adam Meijer; AnneMarie van den Brandt; Annelies Kroneman; Bas van der Veer; Chantal Reusken; Dennis Schmitz; Dirk Eggink; Eunice Then; Florian Zwagemaker; Harry Venema; Ivo van Walle; James Groot; Jeroen Cremer; Jill Kocken; Jolienke Hardeman; Jordy de Bakker; Karim Hajji; Kim Freniks; Linda van Someren; Linda van de Nes; Lisa Wijsman; Lynn Aarts; Melissa van Tull; Robert Kohl; Ryanne Jaarsma; Sanne Bos; Sharon van den Brink; Sjoerd Kulling; Stijn van Rossum; on behalf of the national COVID-19 response team |                                                                                                                                                                                                                                                                                                                                                                                                                                                                                                                                                                                                                                                                                                                                                                                                                                                                                                                                                                                           |
| EPI_ISL_6272797                                                                                                                                                                                                                                                                                                                                                                                                                                                                                                                                                                                                                                                                                                                                                                                                                                                                                                                                                                                                                                                                                                                                                                                                                                                                                                                                                                                                                                                                                                                                                                                                                                                                                                                                                                                                                                                                                       | Dział Diagnostyki Laboratoryjnej                                                                                                       | Wojewodzka Stacja Sanitarno-Epidemiologiczna w Gorzowie Wielkopolskim                                                                                                                                                                                                                                                                                                                                                                                                                                                            | Elzbieta Justynska; Klaudia Kobenzka-Wlodarczak; Patrycja Faberska and Marek Margol; Renata Siegel                                                                                                                                                                                                                                                                                                                                                                                                                                                                                                                                                                                                                                                                                                                                                                                                                                                                                        |
| EPI_ISL_639662,<br>EPI_ISL_9031246                                                                                                                                                                                                                                                                                                                                                                                                                                                                                                                                                                                                                                                                                                                                                                                                                                                                                                                                                                                                                                                                                                                                                                                                                                                                                                                                                                                                                                                                                                                                                                                                                                                                                                                                                                                                                                                                    | E. Gulbja Laboratorija                                                                                                                 | Latvian Biomedical Research and Study Centre                                                                                                                                                                                                                                                                                                                                                                                                                                                                                     | Aise Jakovele; Davids Fridmanis; Dmitrijs Perminovs; Elina Dimina; Guntars Zarins; Ivars Silamikelis; Ivars Silamikelis; Janis Klavins; Janis Pjalkovskis; Juris Perevoscikovs; Jānis Kloviņš; Kaspars Megnis; Laila Silamikele; Lauma Freimane; Laura Ansonē; Liga Birzniece; Mikus Gavars; Monta Briviba; Monta Ustinova; Nikita Zrelovs; Uga Dumpis; Una Krumina; Vita Rovite; Vita Rovite; Nikita Zrelovs                                                                                                                                                                                                                                                                                                                                                                                                                                                                                                                                                                             |
| EPI_ISL_1613349,<br>EPI_ISL_8385752,<br>EPI_ISL_8403056                                                                                                                                                                                                                                                                                                                                                                                                                                                                                                                                                                                                                                                                                                                                                                                                                                                                                                                                                                                                                                                                                                                                                                                                                                                                                                                                                                                                                                                                                                                                                                                                                                                                                                                                                                                                                                               | E. Gulbja laboratorija                                                                                                                 | Latvian Biomedical Research and Study Centre                                                                                                                                                                                                                                                                                                                                                                                                                                                                                     | Aise Jakovele; Davids Fridmanis; Dmitrijs Perminovs; Elina Dimina; Guntars Zarins; Ivars Silamikelis; Janis Klavins; Janis Pjalkovskis; Juris Perevoscikovs; Kaspars Megnis; Laila Silamikele; Lauma Freimane; Laura Ansonē; Liga Birzniece; Mikus Gavars; Monta Briviba; Monta Ustinova; Nikita Zrelovs; Uga Dumpis; Una Krumina; Vita Rovite                                                                                                                                                                                                                                                                                                                                                                                                                                                                                                                                                                                                                                            |
| EPI_ISL_2313939                                                                                                                                                                                                                                                                                                                                                                                                                                                                                                                                                                                                                                                                                                                                                                                                                                                                                                                                                                                                                                                                                                                                                                                                                                                                                                                                                                                                                                                                                                                                                                                                                                                                                                                                                                                                                                                                                       | ELBLAB GmbH Zentrum für LaborMedizin                                                                                                   | Robert Koch Institute                                                                                                                                                                                                                                                                                                                                                                                                                                                                                                            |                                                                                                                                                                                                                                                                                                                                                                                                                                                                                                                                                                                                                                                                                                                                                                                                                                                                                                                                                                                           |
| EPI_ISL_2370949                                                                                                                                                                                                                                                                                                                                                                                                                                                                                                                                                                                                                                                                                                                                                                                                                                                                                                                                                                                                                                                                                                                                                                                                                                                                                                                                                                                                                                                                                                                                                                                                                                                                                                                                                                                                                                                                                       | ETHNIKO KENTRO AIMODOSIAS E.K.E.A.                                                                                                     | Greek Genome Center, Biomedical Research Foundation of the Academy of Athens (BRFAA)                                                                                                                                                                                                                                                                                                                                                                                                                                             | Dimitrios Thanos; Eftimia Petinaki; Emmanouil Athanasiadis; Giannis Vatsellas; Katerina Zoi; Kostas Stamoulis; Theodoros Loupis                                                                                                                                                                                                                                                                                                                                                                                                                                                                                                                                                                                                                                                                                                                                                                                                                                                           |
| EPI_ISL_6843518                                                                                                                                                                                                                                                                                                                                                                                                                                                                                                                                                                                                                                                                                                                                                                                                                                                                                                                                                                                                                                                                                                                                                                                                                                                                                                                                                                                                                                                                                                                                                                                                                                                                                                                                                                                                                                                                                       | EXALAB LE HAILLAN                                                                                                                      | CNR Virus des Infections Respiratoires - France SUD                                                                                                                                                                                                                                                                                                                                                                                                                                                                              | Antonin Bal; Bruno Lina; Bruno Simon; Gregory Destras; Gwendolynne Burfin; Hadrien Regue; Laurence Josset; Martine Valette; Quentin Semanas                                                                                                                                                                                                                                                                                                                                                                                                                                                                                                                                                                                                                                                                                                                                                                                                                                               |
| EPI_ISL_1811686, EPI_ISL_1811717, EPI_ISL_1813858, EPI_ISL_1814453, EPI_ISL_1814649, EPI_ISL_1814841, EPI_ISL_1815200, EPI_ISL_1815373, EPI_ISL_1815473, EPI_ISL_1816348, EPI_ISL_3509521, EPI_ISL_3509650, EPI_ISL_3692364, EPI_ISL_3937035, EPI_ISL_4519679, EPI_ISL_4520060, EPI_ISL_7337081                                                                                                                                                                                                                                                                                                                                                                                                                                                                                                                                                                                                                                                                                                                                                                                                                                                                                                                                                                                                                                                                                                                                                                                                                                                                                                                                                                                                                                                                                                                                                                                                       | see above                                                                                                                              | EXCITE Lab                                                                                                                                                                                                                                                                                                                                                                                                                                                                                                                       | Abigail Schnapper; Alexandre Boize; Alice Summerfield; Angela Scioscia; Borsika Rabin; Jelena Andrade; Charlotte Rivera-Garcia; Chip Scholey; Christine Mitchell + SEARHC; David Becker; David Pride; Efrén Sandoval; Elizabeth Cirulli; Fatima Munos; Francisco Tanudjaja; Fred Wu; Geraint Levani; Helena Tubb; James Lu + SEARHC; Jason Nguyen; Jimmy Ramirez; Kelly Schiabor Barrett; Linda Salgin; Louise Laurent; Magnus Isaksson; Marc Laurent; Marva Seifert; Natasha Martin Cheryl Anderson; Nicole L Washington; Nicole Stadinck; Paul Watson + SEARHC; Robert Tukey; Ryan Cho; Sawyer Farmer; Sharon Reed; Sherry Ward; Tommy Whites; SEARHC; Tyler Cassens; William Lee                                                                                                                                                                                                                                                                                                       |
| EPI_ISL_5552237                                                                                                                                                                                                                                                                                                                                                                                                                                                                                                                                                                                                                                                                                                                                                                                                                                                                                                                                                                                                                                                                                                                                                                                                                                                                                                                                                                                                                                                                                                                                                                                                                                                                                                                                                                                                                                                                                       | Eastern Visayas Regional Covid-19 Testing Center                                                                                       | Philippine Genome Center                                                                                                                                                                                                                                                                                                                                                                                                                                                                                                         | Alethea R. de Guzman; Alyssa Joyce E. Telles; Anna Ong-Lim; Arienne A. Zamora; Benedict A. Maralit; Carlo M. Lapid; Celia Carlos; Cynthia P. Saloma; Devon Ray Pacial; Diomedes A. Cariño; Edsel Maurice Salvana; El King D. Morado; Elcid Aaron R. Pangilinan; Eva Maria Cutiungco-de la Paz; Francis A. Tablizo; Henrietta Marie Rodriguez; Jaime C. Montoya; Jan Michael C. Yap; Jarvin E. Nipales; Jo-Hannah S. Llames; John Michael Egana; John Q. Wong; Joshua Gregor A. Dizon; Joshua Jose Endozo; Juan Antonio R. Magalang; Karol Sophia Agape R. Padilla; Kris P. Punayan; Kristina Patriz Dela Cruz; Lindsay Clare D.L. Carandang; Ma. Exanil Plantig; Marc Edsel C. Ayes; Maria Rosario Singh-Vergeire; Maria Sofia L. Yangzon; Marielle M. Gamboa; Marissa Alejandria; Niña Francesca Bustamante; Razel Nikka M. Hao; Renato Jacinto Q. Mantaring; Rianna Patricia S. Cruz; Shiela Mae M. Araiza; Yvonne Valerie Austria; Zipporah Mariebelle R. Enriquez; Zyreil V. Mollejon |
| EPI_ISL_7296777,<br>EPI_ISL_7738463                                                                                                                                                                                                                                                                                                                                                                                                                                                                                                                                                                                                                                                                                                                                                                                                                                                                                                                                                                                                                                                                                                                                                                                                                                                                                                                                                                                                                                                                                                                                                                                                                                                                                                                                                                                                                                                                   | Edmonton Provincial Lab                                                                                                                | Alberta Precision Labs (APL)                                                                                                                                                                                                                                                                                                                                                                                                                                                                                                     | Buss; Croxen M; Deo A; Dieu P; E; Ferrato C; Gill K; Khan F; Koleva P; Li V; Lloyd C; Lynch T; Ma R; Murphy S; Pabbaraju K; Shokoples S; Thayer J; Tipples G; Whitehouse M; Wong A; Yu C; Zelyas N                                                                                                                                                                                                                                                                                                                                                                                                                                                                                                                                                                                                                                                                                                                                                                                        |
| EPI_ISL_2477705, EPI_ISL_2478439, EPI_ISL_2479127, EPI_ISL_2479166, EPI_ISL_2479743, EPI_ISL_2939366, EPI_ISL_2940072, EPI_ISL_3115837, EPI_ISL_3115935, EPI_ISL_3117152, EPI_ISL_3524275, EPI_ISL_3524320, EPI_ISL_3909711, EPI_ISL_3909962, EPI_ISL_4054169, EPI_ISL_4054835, EPI_ISL_4558854, EPI_ISL_4559711, EPI_ISL_4561123, EPI_ISL_5631460, EPI_ISL_5632147, EPI_ISL_5632301,<br>EPI_ISL_6660161, EPI_ISL_6660533, EPI_ISL_6663955, EPI_ISL_8845004, EPI_ISL_8845429, EPI_ISL_8846055                                                                                                                                                                                                                                                                                                                                                                                                                                                                                                                                                                                                                                                                                                                                                                                                                                                                                                                                                                                                                                                                                                                                                                                                                                                                                                                                                                                                         | see above                                                                                                                              | Edmonton Provincial Lab                                                                                                                                                                                                                                                                                                                                                                                                                                                                                                          | Buss; Croxen M; Deo A; Dieu P; E; Ferrato C; Gill K; Khan F; Koleva P; Li V; Lloyd C; Lynch T; Ma R; Murphy S; Pabbaraju K; Shokoples S; Thayer J; Tipples G; Whitehouse M; Wong A; Yu C; Zelyas N                                                                                                                                                                                                                                                                                                                                                                                                                                                                                                                                                                                                                                                                                                                                                                                        |
| EPI_ISL_5753943                                                                                                                                                                                                                                                                                                                                                                                                                                                                                                                                                                                                                                                                                                                                                                                                                                                                                                                                                                                                                                                                                                                                                                                                                                                                                                                                                                                                                                                                                                                                                                                                                                                                                                                                                                                                                                                                                       | Ehime Prefectural Institute of Public Health and Environmental Science                                                                 | Ehime Prefectural Institute of Public Health and Environmental Science                                                                                                                                                                                                                                                                                                                                                                                                                                                           | Chihiro Nakashini; Chitoshi Toyoshima; Hiromi Iwaki; Hiroto Shinomiya; Kentaro Itokawa; Makoto Kuroda; Masanori Hashino; Naritoshi Bandou; Noriko Aoki; Rina Tanaka; Tsuyoshi Sekizuka; Yasutaka Yamashita                                                                                                                                                                                                                                                                                                                                                                                                                                                                                                                                                                                                                                                                                                                                                                                |
| EPI_ISL_4490426                                                                                                                                                                                                                                                                                                                                                                                                                                                                                                                                                                                                                                                                                                                                                                                                                                                                                                                                                                                                                                                                                                                                                                                                                                                                                                                                                                                                                                                                                                                                                                                                                                                                                                                                                                                                                                                                                       | Ekiti State Emergency Operation Centre                                                                                                 | Africa Centre for Excellence for Genomics of Infectious Diseases (ACEGID), Redeemer's University                                                                                                                                                                                                                                                                                                                                                                                                                                 | A.T.; Abechi; Ajogbasile; Akano; C.A.; C.T.; Eromon; F.V.; Folarin, O.; Happi; I.B.; J.N.; J.U.; K.O.; Kayode; Nosamiefan, I.; Oguzie; Olawoye; Olumade; Olunloyi; P.E.; P.S.; T.J.; Ugwu; Uwanibe                                                                                                                                                                                                                                                                                                                                                                                                                                                                                                                                                                                                                                                                                                                                                                                        |
| EPI_ISL_2346128,<br>EPI_ISL_5694524                                                                                                                                                                                                                                                                                                                                                                                                                                                                                                                                                                                                                                                                                                                                                                                                                                                                                                                                                                                                                                                                                                                                                                                                                                                                                                                                                                                                                                                                                                                                                                                                                                                                                                                                                                                                                                                                   | Emory Molecular Diagnostics Laboratory, Emory Healthcare                                                                               | Piantadosi Lab, Emory Department of Pathology                                                                                                                                                                                                                                                                                                                                                                                                                                                                                    | Ahmed Babiker; Anne Piantadosi; Dara Khosravi                                                                                                                                                                                                                                                                                                                                                                                                                                                                                                                                                                                                                                                                                                                                                                                                                                                                                                                                             |
| EPI_ISL_6087680                                                                                                                                                                                                                                                                                                                                                                                                                                                                                                                                                                                                                                                                                                                                                                                                                                                                                                                                                                                                                                                                                                                                                                                                                                                                                                                                                                                                                                                                                                                                                                                                                                                                                                                                                                                                                                                                                       | Enfer Medical                                                                                                                          | ELDA biotech                                                                                                                                                                                                                                                                                                                                                                                                                                                                                                                     | Elaine M. Kenny                                                                                                                                                                                                                                                                                                                                                                                                                                                                                                                                                                                                                                                                                                                                                                                                                                                                                                                                                                           |
| EPI_ISL_1009509,<br>EPI_ISL_7985452                                                                                                                                                                                                                                                                                                                                                                                                                                                                                                                                                                                                                                                                                                                                                                                                                                                                                                                                                                                                                                                                                                                                                                                                                                                                                                                                                                                                                                                                                                                                                                                                                                                                                                                                                                                                                                                                   | Erie County Public Health (ECPHL)                                                                                                      | University at Buffalo Genomics and Bioinformatics Core                                                                                                                                                                                                                                                                                                                                                                                                                                                                           | Alyssa Pohman; Amanda Boccolucci; Brandon Marzullo; Donald Yergeau; Jennifer Surtees; Jonathan Bard; Natalie Lamb; Norma Nowak                                                                                                                                                                                                                                                                                                                                                                                                                                                                                                                                                                                                                                                                                                                                                                                                                                                            |
| EPI_ISL_876512,<br>EPI_ISL_4412919                                                                                                                                                                                                                                                                                                                                                                                                                                                                                                                                                                                                                                                                                                                                                                                                                                                                                                                                                                                                                                                                                                                                                                                                                                                                                                                                                                                                                                                                                                                                                                                                                                                                                                                                                                                                                                                                    | Eurofins Diatherix                                                                                                                     | Hudsonalpha Genome Sequencing Center                                                                                                                                                                                                                                                                                                                                                                                                                                                                                             | Ada Stewart; Jane Grimwood; Jenell Webber; Jennifer Cart; John Lovell; Joshua Stough; Leslie Malone; Lori H. Handley; Melissa Williams; Stefan Brzezinski; Teresa Jones; and Jeremy Schmutz                                                                                                                                                                                                                                                                                                                                                                                                                                                                                                                                                                                                                                                                                                                                                                                               |
| EPI_ISL_1846150, EPI_ISL_2471646, EPI_ISL_3500035, EPI_ISL_3715926, EPI_ISL_4441149, EPI_ISL_4441173, EPI_ISL_4446531, EPI_ISL_4929974, EPI_ISL_4937374, EPI_ISL_7096127, EPI_ISL_7096274, EPI_ISL_8220515, EPI_ISL_8239659, EPI_ISL_8240477, EPI_ISL_8671809, EPI_ISL_8683525                                                                                                                                                                                                                                                                                                                                                                                                                                                                                                                                                                                                                                                                                                                                                                                                                                                                                                                                                                                                                                                                                                                                                                                                                                                                                                                                                                                                                                                                                                                                                                                                                        | see above                                                                                                                              | Eurofins LifeCodexx GmbH                                                                                                                                                                                                                                                                                                                                                                                                                                                                                                         | Robert Koch Institute                                                                                                                                                                                                                                                                                                                                                                                                                                                                                                                                                                                                                                                                                                                                                                                                                                                                                                                                                                     |
| EPI_ISL_3716020,<br>EPI_ISL_7751021                                                                                                                                                                                                                                                                                                                                                                                                                                                                                                                                                                                                                                                                                                                                                                                                                                                                                                                                                                                                                                                                                                                                                                                                                                                                                                                                                                                                                                                                                                                                                                                                                                                                                                                                                                                                                                                                   | Eurofins MVZ Labor Gelsenkirchen                                                                                                       | Robert Koch Institute                                                                                                                                                                                                                                                                                                                                                                                                                                                                                                            |                                                                                                                                                                                                                                                                                                                                                                                                                                                                                                                                                                                                                                                                                                                                                                                                                                                                                                                                                                                           |

|                                                                                                                                                                                                                                                                                                                                                                                                                                                                                                                                                                                                                                                                                                                                                                                                                                                                                                                                                                                                                                                                                                                                                                                                                                                                                                                                                                                                                                                                                                                                                                                                                                                                                                                                                                                                                                                                                                                                                                                                                                                                                                                                                                                                                                                                                                                                                                                                                                                                                                              |                                                                                                                                                                        |                                                                                                                                                                                                                                                                                                                                                                        |                                                                                                                                                                                                                                                                                                                                                                                                                                                                                                                                                                                                                                                                                                                                                                                                                                                                                                                                                                                                                                                                                                                                                                                                                                                                                                                                                   |
|--------------------------------------------------------------------------------------------------------------------------------------------------------------------------------------------------------------------------------------------------------------------------------------------------------------------------------------------------------------------------------------------------------------------------------------------------------------------------------------------------------------------------------------------------------------------------------------------------------------------------------------------------------------------------------------------------------------------------------------------------------------------------------------------------------------------------------------------------------------------------------------------------------------------------------------------------------------------------------------------------------------------------------------------------------------------------------------------------------------------------------------------------------------------------------------------------------------------------------------------------------------------------------------------------------------------------------------------------------------------------------------------------------------------------------------------------------------------------------------------------------------------------------------------------------------------------------------------------------------------------------------------------------------------------------------------------------------------------------------------------------------------------------------------------------------------------------------------------------------------------------------------------------------------------------------------------------------------------------------------------------------------------------------------------------------------------------------------------------------------------------------------------------------------------------------------------------------------------------------------------------------------------------------------------------------------------------------------------------------------------------------------------------------------------------------------------------------------------------------------------------------|------------------------------------------------------------------------------------------------------------------------------------------------------------------------|------------------------------------------------------------------------------------------------------------------------------------------------------------------------------------------------------------------------------------------------------------------------------------------------------------------------------------------------------------------------|---------------------------------------------------------------------------------------------------------------------------------------------------------------------------------------------------------------------------------------------------------------------------------------------------------------------------------------------------------------------------------------------------------------------------------------------------------------------------------------------------------------------------------------------------------------------------------------------------------------------------------------------------------------------------------------------------------------------------------------------------------------------------------------------------------------------------------------------------------------------------------------------------------------------------------------------------------------------------------------------------------------------------------------------------------------------------------------------------------------------------------------------------------------------------------------------------------------------------------------------------------------------------------------------------------------------------------------------------|
| EPI_ISL_8348365<br>EPI_ISL_45168167                                                                                                                                                                                                                                                                                                                                                                                                                                                                                                                                                                                                                                                                                                                                                                                                                                                                                                                                                                                                                                                                                                                                                                                                                                                                                                                                                                                                                                                                                                                                                                                                                                                                                                                                                                                                                                                                                                                                                                                                                                                                                                                                                                                                                                                                                                                                                                                                                                                                          | Eurofins-NMDL<br>FACULDADE DE MEDICINA ABC                                                                                                                             | Eurofins-NMDL<br>Instituto Butantan                                                                                                                                                                                                                                                                                                                                    | Anco Molijn; Anne Vogel; Lisa Dreesens; Marvin Ruiter; Maurine Leversteijn-van Hall; Roy Masius; Simon Lansu                                                                                                                                                                                                                                                                                                                                                                                                                                                                                                                                                                                                                                                                                                                                                                                                                                                                                                                                                                                                                                                                                                                                                                                                                                      |
| EPI_ISL_4071051                                                                                                                                                                                                                                                                                                                                                                                                                                                                                                                                                                                                                                                                                                                                                                                                                                                                                                                                                                                                                                                                                                                                                                                                                                                                                                                                                                                                                                                                                                                                                                                                                                                                                                                                                                                                                                                                                                                                                                                                                                                                                                                                                                                                                                                                                                                                                                                                                                                                                              | FL Bureau of Public Health Laboratories-Tampa                                                                                                                          | Centers for Disease Control and Prevention Division of Viral Diseases, Pathogen Discovery                                                                                                                                                                                                                                                                              | Alex Burgin; Ben Rambo-Martin; Clinton Paden; Dakota Howard; Dave Wentworth; Dhvani Batra; Jasmine Padilla; Justin Lee; Krista Queen; Kristen Knipe; Kristine Lacek; Mark Burroughs; Matthew Schmerer; Meghan Bentz; Mili Sheth; Peter Cook; Sam Shepard; Sarah Nobles; Suxiang Tong; Vivien Dugan; Yvette Unorumhii                                                                                                                                                                                                                                                                                                                                                                                                                                                                                                                                                                                                                                                                                                                                                                                                                                                                                                                                                                                                                              |
| EPI_ISL_5511507<br>EPI_ISL_7285754<br>EPI_ISL_7210685                                                                                                                                                                                                                                                                                                                                                                                                                                                                                                                                                                                                                                                                                                                                                                                                                                                                                                                                                                                                                                                                                                                                                                                                                                                                                                                                                                                                                                                                                                                                                                                                                                                                                                                                                                                                                                                                                                                                                                                                                                                                                                                                                                                                                                                                                                                                                                                                                                                        | FYR Diagnostics<br>Fakultní nemocnice u sv. Anny v Brně<br>Famagusta General Hospital                                                                                  | FYR Diagnostics<br>Fakultní nemocnice u sv. Anny v Brně<br>Laboratory of Biotechnology and Molecular Virology, University of Cyprus                                                                                                                                                                                                                                    | Blohm; Ghai; Tre; Vikas<br>Lenka Zamecnikova; Milada Dvořáčková, Jan Vrbsky<br>Leondios G. Kostrikis et al.                                                                                                                                                                                                                                                                                                                                                                                                                                                                                                                                                                                                                                                                                                                                                                                                                                                                                                                                                                                                                                                                                                                                                                                                                                       |
| EPI_ISL_9133197<br>EPI_ISL_4820256                                                                                                                                                                                                                                                                                                                                                                                                                                                                                                                                                                                                                                                                                                                                                                                                                                                                                                                                                                                                                                                                                                                                                                                                                                                                                                                                                                                                                                                                                                                                                                                                                                                                                                                                                                                                                                                                                                                                                                                                                                                                                                                                                                                                                                                                                                                                                                                                                                                                           | Family Care Medical Group Clinical Laboratories<br>Fiji Centre for Communicable Disease Control                                                                        | SUNY Upstate Medical University<br>Microbiological Diagnostic Unit - Public Health Laboratory (MDU-PHL)                                                                                                                                                                                                                                                                | Brian Pavlovitz; Frank Middleton<br>Cabemaiwai, T.; Faktaufon, D.; Horan, K.; N.L.; Sahukhan, A.; Seemann, T.; Sherry; Singh, S.                                                                                                                                                                                                                                                                                                                                                                                                                                                                                                                                                                                                                                                                                                                                                                                                                                                                                                                                                                                                                                                                                                                                                                                                                  |
| EPI_ISL_2506339<br>EPI_ISL_2506699<br>EPI_ISL_3020706<br>EPI_ISL_3230693<br>EPI_ISL_4232874<br>EPI_ISL_5640530<br>EPI_ISL_2189065<br>EPI_ISL_5161609                                                                                                                                                                                                                                                                                                                                                                                                                                                                                                                                                                                                                                                                                                                                                                                                                                                                                                                                                                                                                                                                                                                                                                                                                                                                                                                                                                                                                                                                                                                                                                                                                                                                                                                                                                                                                                                                                                                                                                                                                                                                                                                                                                                                                                                                                                                                                         | Fimlab Laboratoriot Oy Tampere<br>First Aide Diagnostic Center                                                                                                         | Expert Microbiology, National Institute for Health and Welfare<br>Philippine Genome Center                                                                                                                                                                                                                                                                             | Carita Savolainen-Kopra; Erika Lindh; Haider al-Hello; Jani Halkilahti; Kirsi Liitsola; Niina Ikonen; Olli Vapalahti; Pekka Ellonen; Phuoc Truong; Päivi Laurila; Ravi Kant; Sari Hannula; Soile Blomqvist; Teemu Smura<br>Alethea R. de Guzman; Anna Ong-Lim; Arianne A. Zamora; Asia Louisa U. Chong; Benedict A. Maralit; Candice Francheska B. Tambaoan; Carlo M. Lapid; Celia Carlos; Cynthia P. Saloma; Devon Ray Pacial; Diomedes A. Cariño; Edsel Maurice Salvana; Edsel Maurice Salvaña; El King D. Morado; Elcid Aarón R. Pangilinan; Eva Maria Gutongco-de la Paz; Francis A. Tablado; Henrietta Marie Rodriguez; Irish Coleen A. Asin; Jaime C. Montoya; Jan Michael C. Yap; Jarvin E. Nipales; Jo-Hannah S. Llamas; John O. Wong; Joshua Gregor A. Dizon; Juan Antonio R. Magalang; Karol Sophia Agape R. Padilla; Kenneth M. Kim; Kris P. Punayari; Kristina Patric Dela Cruz; Lindsay Clare D.L. Carandang; Ma. Exanil Planting; Marc Edsel C. Ayes; Maria Rosario Singh-Vergeire; Maria Rosario Singh-Vergeire and Cynthia P. Saloma; Maria Sofia L. Yangzon; Marielle M. Gamboa; Marissa Alejandria; Niña Francesca Bustamante; Razel Nikka M. Hao; Renato Jacinto O. Mantaring; Rianna Patricia S. Cruz; Sheila Mae M. Araiza; Shiela Mae M. Araiza; Yvonne Valerie Austria; Zipporah Mariebelle R. Enriquez; Zirel V. Molljeon |
| EPI_ISL_517859, EPI_ISL_613861, EPI_ISL_848795, EPI_ISL_849037, EPI_ISL_1030206, EPI_ISL_1049958, EPI_ISL_1531071, EPI_ISL_1531133, EPI_ISL_2836023, EPI_ISL_5322459, EPI_ISL_5542496, EPI_ISL_5925200, EPI_ISL_5925887, EPI_ISL_5926035, EPI_ISL_6366701, EPI_ISL_6565759, EPI_ISL_7697117                                                                                                                                                                                                                                                                                                                                                                                                                                                                                                                                                                                                                                                                                                                                                                                                                                                                                                                                                                                                                                                                                                                                                                                                                                                                                                                                                                                                                                                                                                                                                                                                                                                                                                                                                                                                                                                                                                                                                                                                                                                                                                                                                                                                                  | Florida Bureau of Public Health Laboratories<br>Foerde Hospital, Department of Microbiology                                                                            | Florida Bureau of Public Health Laboratories<br>Norwegian Institute of Public Health, Department of Virology                                                                                                                                                                                                                                                           | Jason Blanton; Namratha Tarigopula; Sarah Schmedes; Tiffany Splatt<br>Atiya R Ali; Debec Nadia; Engebretsen Serina Beate; Garcia Lorente Ignacio; Hilde Elshaug; Hilde Vollan; Jon Bråte; Kamilla Heddeland Instefjord; Karoline Bragstad; Kathrine Stene-Johansen; Line Victoria Moen; Marie Paulsen Madsen; Olav Hungnes; Pedersen Benedikte Nevjen; Rasmus Riis Kopperud<br>Ferruccio Ceriotti; Sara Uceda Renteria                                                                                                                                                                                                                                                                                                                                                                                                                                                                                                                                                                                                                                                                                                                                                                                                                                                                                                                            |
| EPI_ISL_3446746                                                                                                                                                                                                                                                                                                                                                                                                                                                                                                                                                                                                                                                                                                                                                                                                                                                                                                                                                                                                                                                                                                                                                                                                                                                                                                                                                                                                                                                                                                                                                                                                                                                                                                                                                                                                                                                                                                                                                                                                                                                                                                                                                                                                                                                                                                                                                                                                                                                                                              | Fondazione IRCCS Ca' Granda Ospedale Maggiore Policlinico                                                                                                              | Fondazione IRCCS Ca' Granda Ospedale Maggiore Policlinico                                                                                                                                                                                                                                                                                                              | Masaki Nori                                                                                                                                                                                                                                                                                                                                                                                                                                                                                                                                                                                                                                                                                                                                                                                                                                                                                                                                                                                                                                                                                                                                                                                                                                                                                                                                       |
| EPI_ISL_2014964, EPI_ISL_2357341, EPI_ISL_2357363, EPI_ISL_2773530, EPI_ISL_2773602, EPI_ISL_3192016, EPI_ISL_3874864                                                                                                                                                                                                                                                                                                                                                                                                                                                                                                                                                                                                                                                                                                                                                                                                                                                                                                                                                                                                                                                                                                                                                                                                                                                                                                                                                                                                                                                                                                                                                                                                                                                                                                                                                                                                                                                                                                                                                                                                                                                                                                                                                                                                                                                                                                                                                                                        | Fukuoka Institute of Health and Environmental Sciences                                                                                                                 | Fukuoka Institute of Health and Environmental Sciences                                                                                                                                                                                                                                                                                                                 | Akira Ohishi; Asako Nakamura; Carl Yuki; Chiharu Katamune; Hiroaki Shigemura; Ikumi Sato; Kentaro Itokawa; Makoto Kuroda; Masanori Hashino; Mitsuhiro Hamasaki; Rina Tanaka; Saori Ueda; Takayuki Kobayashi; Tsuyoshi Sekizuka; Yoshiki Etoh; Yuki Ashizuka; Yuki Carl                                                                                                                                                                                                                                                                                                                                                                                                                                                                                                                                                                                                                                                                                                                                                                                                                                                                                                                                                                                                                                                                            |
| EPI_ISL_688957<br>EPI_ISL_894675<br>EPI_ISL_894734                                                                                                                                                                                                                                                                                                                                                                                                                                                                                                                                                                                                                                                                                                                                                                                                                                                                                                                                                                                                                                                                                                                                                                                                                                                                                                                                                                                                                                                                                                                                                                                                                                                                                                                                                                                                                                                                                                                                                                                                                                                                                                                                                                                                                                                                                                                                                                                                                                                           | Fukuoka Institute of Health and Environmental Sciences                                                                                                                 | Pathogen Genomics Center, National Institute of Infectious Diseases                                                                                                                                                                                                                                                                                                    | Kentaro Itokawa; Makoto Kuroda; Masanori Hashino; Rina Tanaka; Tsuyoshi Sekizuka                                                                                                                                                                                                                                                                                                                                                                                                                                                                                                                                                                                                                                                                                                                                                                                                                                                                                                                                                                                                                                                                                                                                                                                                                                                                  |
| EPI_ISL_5770676<br>EPI_ISL_8112860                                                                                                                                                                                                                                                                                                                                                                                                                                                                                                                                                                                                                                                                                                                                                                                                                                                                                                                                                                                                                                                                                                                                                                                                                                                                                                                                                                                                                                                                                                                                                                                                                                                                                                                                                                                                                                                                                                                                                                                                                                                                                                                                                                                                                                                                                                                                                                                                                                                                           | Fukushima Prefectural Institute of Public Health                                                                                                                       | Fukushima Prefectural Institute of Public Health                                                                                                                                                                                                                                                                                                                       | Kaduzhiro Kitakawa; Kazunori Suzuki; Kentaro Itokawa; Makoto Kuroda; Masanori Hashino; Naoko Kashiwabara; Rie Suzuki; Rina Tanaka; Shohei Fujita; Tsuyoshi Sekizuka                                                                                                                                                                                                                                                                                                                                                                                                                                                                                                                                                                                                                                                                                                                                                                                                                                                                                                                                                                                                                                                                                                                                                                               |
| EPI_ISL_1458751, EPI_ISL_1460207, EPI_ISL_1481572, EPI_ISL_1555235, EPI_ISL_1667245, EPI_ISL_1992230, EPI_ISL_1993366, EPI_ISL_2038095, EPI_ISL_2038454, EPI_ISL_2043616, EPI_ISL_2043690, EPI_ISL_2043712, EPI_ISL_2160818, EPI_ISL_2441822, EPI_ISL_2526071, EPI_ISL_2785955, EPI_ISL_2928580, EPI_ISL_3016572, EPI_ISL_3110433, EPI_ISL_3208862, EPI_ISL_3210889, EPI_ISL_3210994, EPI_ISL_3211277, EPI_ISL_3212499, EPI_ISL_3289903, EPI_ISL_3300772, EPI_ISL_3301819, EPI_ISL_3304573, EPI_ISL_3304640, EPI_ISL_3304673, EPI_ISL_3348356, EPI_ISL_3349284, EPI_ISL_3350467, EPI_ISL_3350827, EPI_ISL_3351575, EPI_ISL_3351770, EPI_ISL_3352045, EPI_ISL_3429163, EPI_ISL_3457224, EPI_ISL_3457255, EPI_ISL_3457366, EPI_ISL_3521414, EPI_ISL_3522273, EPI_ISL_3522873, EPI_ISL_3662083, EPI_ISL_3719203, EPI_ISL_3719302, EPI_ISL_3719847, EPI_ISL_3753463, EPI_ISL_3865340, EPI_ISL_3865344, EPI_ISL_3865868, EPI_ISL_3866311, EPI_ISL_3866347, EPI_ISL_4021968, EPI_ISL_4023025, EPI_ISL_4026717, EPI_ISL_4026458, EPI_ISL_4034250, EPI_ISL_4034835, EPI_ISL_4034991, EPI_ISL_4183063, EPI_ISL_4184720, EPI_ISL_4184962, EPI_ISL_4184978, EPI_ISL_4202412, EPI_ISL_4243993, EPI_ISL_4357661, EPI_ISL_4369143, EPI_ISL_4370244, EPI_ISL_4372507, EPI_ISL_4456386, EPI_ISL_4565807, EPI_ISL_4637407, EPI_ISL_4637463, EPI_ISL_4637516, EPI_ISL_4827861, EPI_ISL_4903538, EPI_ISL_5082578, EPI_ISL_5092494, EPI_ISL_5213619, EPI_ISL_5215295, EPI_ISL_5232020, EPI_ISL_5233171, EPI_ISL_5235035, EPI_ISL_5308140, EPI_ISL_5377119, EPI_ISL_5379326, EPI_ISL_5390068, EPI_ISL_5579592, EPI_ISL_5581346, EPI_ISL_5582090, EPI_ISL_5582560, EPI_ISL_5619291, EPI_ISL_5618631, EPI_ISL_5619291, EPI_ISL_5898822, EPI_ISL_5901343, EPI_ISL_5901801, EPI_ISL_5901834, EPI_ISL_5902018, EPI_ISL_5979049, EPI_ISL_6000883, EPI_ISL_6001220, EPI_ISL_6071697, EPI_ISL_6072079, EPI_ISL_6072109, EPI_ISL_6094087, EPI_ISL_6119230, EPI_ISL_6398916, EPI_ISL_6417864, EPI_ISL_6418424, EPI_ISL_6511719, EPI_ISL_6625945, EPI_ISL_6628611, EPI_ISL_6654618, EPI_ISL_6655744, EPI_ISL_6655806, EPI_ISL_6893633, EPI_ISL_7126188, EPI_ISL_7127534, EPI_ISL_7447588, EPI_ISL_7447683, EPI_ISL_7447758, EPI_ISL_7448538, EPI_ISL_7448941, EPI_ISL_7448950, EPI_ISL_7475365, EPI_ISL_7476336, EPI_ISL_7699326, EPI_ISL_7699365, EPI_ISL_7741700, EPI_ISL_7800582, EPI_ISL_7847202, EPI_ISL_7847475, EPI_ISL_8080619, EPI_ISL_8092229, EPI_ISL_8183167, EPI_ISL_8183181, EPI_ISL_8282178, EPI_ISL_8290679, EPI_ISL_8360437 |                                                                                                                                                                        |                                                                                                                                                                                                                                                                                                                                                                        |                                                                                                                                                                                                                                                                                                                                                                                                                                                                                                                                                                                                                                                                                                                                                                                                                                                                                                                                                                                                                                                                                                                                                                                                                                                                                                                                                   |
| see above                                                                                                                                                                                                                                                                                                                                                                                                                                                                                                                                                                                                                                                                                                                                                                                                                                                                                                                                                                                                                                                                                                                                                                                                                                                                                                                                                                                                                                                                                                                                                                                                                                                                                                                                                                                                                                                                                                                                                                                                                                                                                                                                                                                                                                                                                                                                                                                                                                                                                                    | Fulgent Genetics                                                                                                                                                       | Centers for Disease Control and Prevention Division of Viral Diseases, Pathogen Discovery                                                                                                                                                                                                                                                                              | Adrian Pasky; Becky Tsai; Benafsh Sapra; Benjamin Rambo-Martin; Christopher Gulwick; Clinton Paden; Clinton R. Paden; Dakota Howard; Darlene Wagner; Dhvani Batra; Doreen Ng; Duncan MacCannell; Erisa Sula; Harry Gao; James Xie; Jason Caravas; John Gao; Joseph Fierro; Kara Moser; Kristine Lacek; Matthew Schmerer; Mickey Li; Peter Cook; Peter W. Cook; Scott Sammons; Shatavia Morrison; Tymeckia Kendall; Victoria Caban Figueroa; Yan Meng; Yvette Unorumhii                                                                                                                                                                                                                                                                                                                                                                                                                                                                                                                                                                                                                                                                                                                                                                                                                                                                            |
| EPI_ISL_1937306<br>EPI_ISL_8055767<br>EPI_ISL_9055779                                                                                                                                                                                                                                                                                                                                                                                                                                                                                                                                                                                                                                                                                                                                                                                                                                                                                                                                                                                                                                                                                                                                                                                                                                                                                                                                                                                                                                                                                                                                                                                                                                                                                                                                                                                                                                                                                                                                                                                                                                                                                                                                                                                                                                                                                                                                                                                                                                                        | Fulgent Genetics<br>Fundacao Ezequiel Dias                                                                                                                             | Fulgent Genetics<br>Instituto Rene Rachou / Fiocruz Minas                                                                                                                                                                                                                                                                                                              | Becky Tsai; Benafsh Sapra; Doreen Ng; Harry Gao; James Xie; John Gao; Joseph Fierro; Mickey Li; Yan Meng<br>on behalf of the Fiocruz COVID-19 Genomic Surveillance Network                                                                                                                                                                                                                                                                                                                                                                                                                                                                                                                                                                                                                                                                                                                                                                                                                                                                                                                                                                                                                                                                                                                                                                        |
| EPI_ISL_1317256<br>EPI_ISL_1317570<br>EPI_ISL_1317800<br>EPI_ISL_2138741<br>EPI_ISL_2925794<br>EPI_ISL_6696031                                                                                                                                                                                                                                                                                                                                                                                                                                                                                                                                                                                                                                                                                                                                                                                                                                                                                                                                                                                                                                                                                                                                                                                                                                                                                                                                                                                                                                                                                                                                                                                                                                                                                                                                                                                                                                                                                                                                                                                                                                                                                                                                                                                                                                                                                                                                                                                               | Furst Medical Laboratory                                                                                                                                               | Norwegian Institute of Public Health, Department of Virology                                                                                                                                                                                                                                                                                                           | Atiya R Ali; Debec Nadia; Engebretsen Serina Beate; Garcia Lorente Ignacio; Hilde Elshaug; Hilde Vollan; Jon Bråte; Kamilla Heddeland Instefjord; Karoline Bragstad; Kathrine Stene-Johansen; Line Victoria Moen; Marie Paulsen Madsen; Olav Hungnes; Pedersen Benedikte Nevjen; Rasmus Riis Kopperud                                                                                                                                                                                                                                                                                                                                                                                                                                                                                                                                                                                                                                                                                                                                                                                                                                                                                                                                                                                                                                             |
| EPI_ISL_4213127<br>EPI_ISL_4213133                                                                                                                                                                                                                                                                                                                                                                                                                                                                                                                                                                                                                                                                                                                                                                                                                                                                                                                                                                                                                                                                                                                                                                                                                                                                                                                                                                                                                                                                                                                                                                                                                                                                                                                                                                                                                                                                                                                                                                                                                                                                                                                                                                                                                                                                                                                                                                                                                                                                           | Fusco Lab                                                                                                                                                              | Maness Lab                                                                                                                                                                                                                                                                                                                                                             | Arnaud Drouin; Dahlene Fusco; Joshua Katz; Lori A. Rowe; Matthew Moreida; Nicholas Maness                                                                                                                                                                                                                                                                                                                                                                                                                                                                                                                                                                                                                                                                                                                                                                                                                                                                                                                                                                                                                                                                                                                                                                                                                                                         |
| EPI_ISL_965844<br>EPI_ISL_4253964<br>EPI_ISL_4253974                                                                                                                                                                                                                                                                                                                                                                                                                                                                                                                                                                                                                                                                                                                                                                                                                                                                                                                                                                                                                                                                                                                                                                                                                                                                                                                                                                                                                                                                                                                                                                                                                                                                                                                                                                                                                                                                                                                                                                                                                                                                                                                                                                                                                                                                                                                                                                                                                                                         | GA Department of Public Health                                                                                                                                         | GA Department of Public Health                                                                                                                                                                                                                                                                                                                                         | Aliyah Fields; Cynthia Dixey; Jonathan Edwards; Sharmila Talekar; Stacy Reeves; Taylor Smith; Tonia Parrott                                                                                                                                                                                                                                                                                                                                                                                                                                                                                                                                                                                                                                                                                                                                                                                                                                                                                                                                                                                                                                                                                                                                                                                                                                       |
| EPI_ISL_3128083                                                                                                                                                                                                                                                                                                                                                                                                                                                                                                                                                                                                                                                                                                                                                                                                                                                                                                                                                                                                                                                                                                                                                                                                                                                                                                                                                                                                                                                                                                                                                                                                                                                                                                                                                                                                                                                                                                                                                                                                                                                                                                                                                                                                                                                                                                                                                                                                                                                                                              | GA Department of Public Health Laboratory                                                                                                                              | Centers for Disease Control and Prevention Division of Viral Diseases, Pathogen Discovery                                                                                                                                                                                                                                                                              | Alex Burgin; Ben L. Rambo-Martin; Clinton R. Paden; Dakota Howard; Dave Wentworth; Dhvani Batra; Jasmine Padilla; Justin Lee; Krista Queen; Kristen Knipe; Kristine Lacek; Mark Burroughs; Matthew Schmerer; Meghan Bentz; Mili Sheth; Peter Cook; Sam Shepard; Sarah Nobles; Suxiang Tong; Vivien Dugan; Yvette Unorumhii                                                                                                                                                                                                                                                                                                                                                                                                                                                                                                                                                                                                                                                                                                                                                                                                                                                                                                                                                                                                                        |
| EPI_ISL_2179450<br>EPI_ISL_7259334                                                                                                                                                                                                                                                                                                                                                                                                                                                                                                                                                                                                                                                                                                                                                                                                                                                                                                                                                                                                                                                                                                                                                                                                                                                                                                                                                                                                                                                                                                                                                                                                                                                                                                                                                                                                                                                                                                                                                                                                                                                                                                                                                                                                                                                                                                                                                                                                                                                                           | GH A.CHENEVIER-H.MONDOR                                                                                                                                                | Department of Virology, Henri Mondor University Hospital, Assistance Publique Hôpitaux de Paris, Université Paris-Est Créteil, INSERM U955                                                                                                                                                                                                                             | Alexandre Soulier; Christophe Rodriguez; Elisabeth Trawinski; Guillaume Gricourt; Jean-Michel Pawlowsky; Melissa N'Debi; Slim Fourati; Vanessa Demontant                                                                                                                                                                                                                                                                                                                                                                                                                                                                                                                                                                                                                                                                                                                                                                                                                                                                                                                                                                                                                                                                                                                                                                                          |
| EPI_ISL_3300635<br>EPI_ISL_583453<br>EPI_ISL_583463<br>EPI_ISL_583473<br>EPI_ISL_4632130<br>EPI_ISL_8658443                                                                                                                                                                                                                                                                                                                                                                                                                                                                                                                                                                                                                                                                                                                                                                                                                                                                                                                                                                                                                                                                                                                                                                                                                                                                                                                                                                                                                                                                                                                                                                                                                                                                                                                                                                                                                                                                                                                                                                                                                                                                                                                                                                                                                                                                                                                                                                                                  | Gandhi Medical College<br>Garcia-Sastre Laboratory, Department of Microbiology, Icahn School of Medicine at Mount Sinai<br>GeneMe Labs, U. Potokowa 10A, 80-283 Gdańsk | CFDF<br>van Bakel Laboratory, Genetics and Genomics Sciences, Icahn School of Medicine at Mount Sinai<br>Laboratory of genomics and metagenomics<br>1. Tricity SARS-CoV-2 sequencing consortium: University of Gdansk, Medical University of Gdansk, Vaxican Ltd., Invicta Ltd. 2. National Institute of Public Health - National Institute of Hygiene, Warsaw, Poland | Ashwin Dalal; Asmita Gupta; Divya Vashisht; Murali Bashyam; Nagamani Kammili; Reelina Basu; Vinay Donipadi<br>Adolfo García-Sastre; Adriana van de Guchte; Ajay Obla; Ana S. Gonzalez-Reiche; Genovefa Papanicolaou; Gunjan Shah; Harm van Bakel; Jayeeta Dutta; Judith Aberg; Kent Sepkowitz; Miguel-Angel Perales; Ngolela Esther Babady; Sadaf Aslam; Teresa Aydillo; Tobias Hohli; Zenab Khan; and Mini Kamboj<br>Claire Bertelli; Damien Jacot; Gilbert Greub; Sébastien Aebly; Trestan Pilonek                                                                                                                                                                                                                                                                                                                                                                                                                                                                                                                                                                                                                                                                                                                                                                                                                                              |
| EPI_ISL_6151697<br>EPI_ISL_8481494                                                                                                                                                                                                                                                                                                                                                                                                                                                                                                                                                                                                                                                                                                                                                                                                                                                                                                                                                                                                                                                                                                                                                                                                                                                                                                                                                                                                                                                                                                                                                                                                                                                                                                                                                                                                                                                                                                                                                                                                                                                                                                                                                                                                                                                                                                                                                                                                                                                                           | Genepath, Pune<br>General Hospital of Katerini                                                                                                                         | RF-IISER Pune<br>Institute of Applied Biosciences, Centre for Research and Technology Hellas                                                                                                                                                                                                                                                                           | Aurnab Ghose; Joy Mervin Monteiro; Krishanpal Karmodiya; Nikhil Phadke; Shatakshi Ranade<br>Anastasia Chatzidimitriou et al.                                                                                                                                                                                                                                                                                                                                                                                                                                                                                                                                                                                                                                                                                                                                                                                                                                                                                                                                                                                                                                                                                                                                                                                                                      |
| EPI_ISL_1534556, EPI_ISL_2391034, EPI_ISL_2892891, EPI_ISL_3185566, EPI_ISL_3185601, EPI_ISL_4632069, EPI_ISL_4636495, EPI_ISL_4653985, EPI_ISL_5010771, EPI_ISL_5694279, EPI_ISL_6052485, EPI_ISL_6053579, EPI_ISL_6455495, EPI_ISL_7779219                                                                                                                                                                                                                                                                                                                                                                                                                                                                                                                                                                                                                                                                                                                                                                                                                                                                                                                                                                                                                                                                                                                                                                                                                                                                                                                                                                                                                                                                                                                                                                                                                                                                                                                                                                                                                                                                                                                                                                                                                                                                                                                                                                                                                                                                 | Genetica Molecular and Subdepartamento de Virologia ISP Chile                                                                                                          | Instituto de Salud Publica de Chile                                                                                                                                                                                                                                                                                                                                    | Andres Castillo; Barbara Parra; Constanza Campano; Gisselle Barra; Jaime Lagos; Javier Tognarelli; Jorge Fernandez; Karen Orostica; Loredana Arata; Patricia Bustos; Rodrigo Fasce; Soledad Ulloa                                                                                                                                                                                                                                                                                                                                                                                                                                                                                                                                                                                                                                                                                                                                                                                                                                                                                                                                                                                                                                                                                                                                                 |
| EPI_ISL_7924674                                                                                                                                                                                                                                                                                                                                                                                                                                                                                                                                                                                                                                                                                                                                                                                                                                                                                                                                                                                                                                                                                                                                                                                                                                                                                                                                                                                                                                                                                                                                                                                                                                                                                                                                                                                                                                                                                                                                                                                                                                                                                                                                                                                                                                                                                                                                                                                                                                                                                              | Genoloxa Sp. z o.o                                                                                                                                                     | 1. Tricity SARS-CoV-2 sequencing consortium: University of Gdansk, Medical University of Gdansk, Vaxican Ltd., Invicta Ltd. 2. National Institute of Public Health - National Institute of Hygiene, Warsaw, Poland                                                                                                                                                     | Celina Cybulska; Karolina Gackowska; Katarzyna Groth; Katarzyna Zacharczuk; Krystyna Bienkowska Szewczyk; Lukasz Rabalski; Maciej Grzybek; Maciej Kosinski; Magdalena Nowakowska; Marcin Lubocki; Małgorzata Sadkowska-Todys; Tomasz Wolkowicz                                                                                                                                                                                                                                                                                                                                                                                                                                                                                                                                                                                                                                                                                                                                                                                                                                                                                                                                                                                                                                                                                                    |
| EPI_ISL_4736585, EPI_ISL_5419988, EPI_ISL_6517413, EPI_ISL_7022614, EPI_ISL_7023137, EPI_ISL_7475241, EPI_ISL_7640527                                                                                                                                                                                                                                                                                                                                                                                                                                                                                                                                                                                                                                                                                                                                                                                                                                                                                                                                                                                                                                                                                                                                                                                                                                                                                                                                                                                                                                                                                                                                                                                                                                                                                                                                                                                                                                                                                                                                                                                                                                                                                                                                                                                                                                                                                                                                                                                        | Genome Information Research Center, Research Institute for Microbial Diseases, Osaka University                                                                        | Genome Information Research Center, Research Institute for Microbial Diseases, Osaka University                                                                                                                                                                                                                                                                        | Daisuke Mootooka; Hiroya Oki; Kentaro Tanaka; and Shota Nakamura                                                                                                                                                                                                                                                                                                                                                                                                                                                                                                                                                                                                                                                                                                                                                                                                                                                                                                                                                                                                                                                                                                                                                                                                                                                                                  |
| EPI_ISL_480264<br>EPI_ISL_735339<br>EPI_ISL_735362                                                                                                                                                                                                                                                                                                                                                                                                                                                                                                                                                                                                                                                                                                                                                                                                                                                                                                                                                                                                                                                                                                                                                                                                                                                                                                                                                                                                                                                                                                                                                                                                                                                                                                                                                                                                                                                                                                                                                                                                                                                                                                                                                                                                                                                                                                                                                                                                                                                           | Genomic Laboratory (GLAB) (Conjoint lab of Health Directorate of Istanbul and Istanbul Technical University)                                                           | Genomic Laboratory (GLAB), Istanbul Technical University                                                                                                                                                                                                                                                                                                               | Arzu Irvem; Ayse Serra Ozel; Betsi Kose; Betsi Köse; Bugra Agaoglu; Eilifnaz Çelik; Gizem Alkurt; Gizem Dinler Doganay; Ilker Karacan; Jale Yildiz; Levent Doganay; Mehtap Aydin; Mehtap Aydin; Nihat Bugra Agaoglu; Nilsun Altunai; Nilson Denizce Can; Ozlem Akgun Dogan; Payam Zolfaghari; Tugra Kizilboga; Yusem Kendir Mirnikol                                                                                                                                                                                                                                                                                                                                                                                                                                                                                                                                                                                                                                                                                                                                                                                                                                                                                                                                                                                                              |
| EPI_ISL_812795                                                                                                                                                                                                                                                                                                                                                                                                                                                                                                                                                                                                                                                                                                                                                                                                                                                                                                                                                                                                                                                                                                                                                                                                                                                                                                                                                                                                                                                                                                                                                                                                                                                                                                                                                                                                                                                                                                                                                                                                                                                                                                                                                                                                                                                                                                                                                                                                                                                                                               | Genomics Program, Children Cancer Hospital                                                                                                                             | Genomics Program, Children Cancer Hospital                                                                                                                                                                                                                                                                                                                             | Abdo, I.; Abouelnaga, S.; Amer, K.; Bakry, U.; Diab, A.; El-Shaqnqery, H.; El-Zayat, M.; Farawyla, H.; Gomaa, C.; Hadad, A.; Halafawy, A.; Hammad, M.; Hassan, R.; Hassan, W.; Hatem, A.; Hussein, S.; Jalal, D.; Magdeldin, S.; Mansour, T.; Monuir, G.; Salah, H.; Samir,                                                                                                                                                                                                                                                                                                                                                                                                                                                                                                                                                                                                                                                                                                                                                                                                                                                                                                                                                                                                                                                                       |

|                                                                                                                                                                                                                                                                                                                                                                                                                                                                                                                                                                                                                                                                                                                                                                                                                                                                                                                                                                                                                          |                                                                         |                                                                                                                                            |                                                                                                                                                                                                                                                                                                                                                                                                                                                                                                                                                                                                  |
|--------------------------------------------------------------------------------------------------------------------------------------------------------------------------------------------------------------------------------------------------------------------------------------------------------------------------------------------------------------------------------------------------------------------------------------------------------------------------------------------------------------------------------------------------------------------------------------------------------------------------------------------------------------------------------------------------------------------------------------------------------------------------------------------------------------------------------------------------------------------------------------------------------------------------------------------------------------------------------------------------------------------------|-------------------------------------------------------------------------|--------------------------------------------------------------------------------------------------------------------------------------------|--------------------------------------------------------------------------------------------------------------------------------------------------------------------------------------------------------------------------------------------------------------------------------------------------------------------------------------------------------------------------------------------------------------------------------------------------------------------------------------------------------------------------------------------------------------------------------------------------|
| EPI_ISL_2340212                                                                                                                                                                                                                                                                                                                                                                                                                                                                                                                                                                                                                                                                                                                                                                                                                                                                                                                                                                                                          | Germano de Sousa                                                        | Instituto Nacional de Saude (INSA)                                                                                                         | O.; Sayed, A.; Soliman, M.; Soliman, S.; shalaby, L.                                                                                                                                                                                                                                                                                                                                                                                                                                                                                                                                             |
| EPI_ISL_3799749                                                                                                                                                                                                                                                                                                                                                                                                                                                                                                                                                                                                                                                                                                                                                                                                                                                                                                                                                                                                          | Gibraltar Health Authority Lab                                          | Gibraltar Health Authority Covid-19 Laboratory                                                                                             | Borges et al                                                                                                                                                                                                                                                                                                                                                                                                                                                                                                                                                                                     |
| EPI_ISL_1502899                                                                                                                                                                                                                                                                                                                                                                                                                                                                                                                                                                                                                                                                                                                                                                                                                                                                                                                                                                                                          | Gorgas Memorial Laboratory of Health Studies                            | Gorgas Memorial Laboratory of Health Studies                                                                                               | Dr Daniel Cassaglia; Dr Martyn Bell; Dr Nicholas Cortes; Dr Zoe Vincent                                                                                                                                                                                                                                                                                                                                                                                                                                                                                                                          |
| EPI_ISL_2613979, EPI_ISL_3642398, EPI_ISL_5116158, EPI_ISL_5623021, EPI_ISL_5623058, EPI_ISL_5991012, EPI_ISL_6422893                                                                                                                                                                                                                                                                                                                                                                                                                                                                                                                                                                                                                                                                                                                                                                                                                                                                                                    | see above                                                               | Gravity Diagnostics, LLC                                                                                                                   | Castillo Jorge; Franco Danilo; Gonzalez Claudia; Jessica Gondola; Leyda Abrego; Lopez-Verges Sandra; Marlene Castillo; Martinez Alexander; Moreno Ambar; Moreno Brechla; Oris Chavarria; Ortiz Alma                                                                                                                                                                                                                                                                                                                                                                                              |
| EPI_ISL_7971854                                                                                                                                                                                                                                                                                                                                                                                                                                                                                                                                                                                                                                                                                                                                                                                                                                                                                                                                                                                                          | Gravity Diagnostics, LLC                                                | University of Louisville Sequencing Technology Center                                                                                      | Gravity Diagnostics<br>Aryan Neupane; Elizabeth Hudson; Eric C. Rouchka; James P. Canner; Julia H. Chariker; Melissa L. Smith; Ryan Walker; William Lauer                                                                                                                                                                                                                                                                                                                                                                                                                                        |
| EPI_ISL_2301809, EPI_ISL_2368552, EPI_ISL_2368580, EPI_ISL_2368801, EPI_ISL_2369628, EPI_ISL_2370551, EPI_ISL_2371374                                                                                                                                                                                                                                                                                                                                                                                                                                                                                                                                                                                                                                                                                                                                                                                                                                                                                                    | see above                                                               | Greek Genome Center, Biomedical Research Foundation of the Academy of Athens (BRFAA)                                                       | Dimitrios Thanos; Emmanouil Athanasiadis; Giannis Vatsellas; Katerina Zoi; Theodoros Loupis                                                                                                                                                                                                                                                                                                                                                                                                                                                                                                      |
| EPI_ISL_1534252                                                                                                                                                                                                                                                                                                                                                                                                                                                                                                                                                                                                                                                                                                                                                                                                                                                                                                                                                                                                          | Groote Schuur Hospital wc GSH                                           | NHLS/UCT                                                                                                                                   | Arash Iranzadeh; Bruna Galvao; Carolyn Williamson; Deelan Doolabh; Diana Hardie; Innocent Mudau; Kruger Marais; Lynn Tyers; Marvin Hsiao; Stephen Korsman                                                                                                                                                                                                                                                                                                                                                                                                                                        |
| EPI_ISL_1706731                                                                                                                                                                                                                                                                                                                                                                                                                                                                                                                                                                                                                                                                                                                                                                                                                                                                                                                                                                                                          | Groupe LCD                                                              | Department of Virology, Henri Mondor University Hospital, Assistance Publique Hôpitaux de Paris, Université Paris-Est Créteil, INSERM U955 | Alexandre Soulier; Christophe Rodriguez; Elisabeth Trawinski; Guillaume Gricourt; Jean-Michel Pawlowski; Melissa N'Debi; Slim Fourati; Vanessa Demontant                                                                                                                                                                                                                                                                                                                                                                                                                                         |
| EPI_ISL_3127909                                                                                                                                                                                                                                                                                                                                                                                                                                                                                                                                                                                                                                                                                                                                                                                                                                                                                                                                                                                                          | Guam Public Health Laboratory                                           | Centers for Disease Control and Prevention Division of Viral Diseases, Pathogen Discovery                                                  | Alex Burgin; Ben L. Rambo-Martin; Clinton R. Paden; Dakota Howard; Dave Wentworth; Dhvani Batra; Jasmine Padilla; Justin Lee; Krista Queen; Kristen Knipe; Kristine Lacey; Mark Burroughs; Matthew Schmerer; Meghan Bentz; Mili Sheth; Peter Cook; Sam Shepard; Sarah Nobles; Suxiang Tong; Vivien Dugan; Yvette Unoarumhi                                                                                                                                                                                                                                                                       |
| EPI_ISL_1960107                                                                                                                                                                                                                                                                                                                                                                                                                                                                                                                                                                                                                                                                                                                                                                                                                                                                                                                                                                                                          | Gundersen Clinical Microbiology Laboratory                              | Kabara Cancer Research Institute                                                                                                           | Craig S. Richmond; Paraic A. Kenny                                                                                                                                                                                                                                                                                                                                                                                                                                                                                                                                                               |
| EPI_ISL_661038, EPI_ISL_661083, EPI_ISL_661119                                                                                                                                                                                                                                                                                                                                                                                                                                                                                                                                                                                                                                                                                                                                                                                                                                                                                                                                                                           | Gundersen Molecular Diagnostics Laboratory                              | Kabara Cancer Research Institute                                                                                                           | Craig S. Richmond; Paraic A. Kenny                                                                                                                                                                                                                                                                                                                                                                                                                                                                                                                                                               |
| EPI_ISL_2349232                                                                                                                                                                                                                                                                                                                                                                                                                                                                                                                                                                                                                                                                                                                                                                                                                                                                                                                                                                                                          | Gunma Prefectural Institute of Public Health and Environmental Sciences | Gunma Prefectural Institute of Public Health and Environmental Sciences                                                                    | Daisuke Shinoda; Hiroyuki Tsukagoshi; Kentaro Itokawa; Makoto Kuroda; Mariko Saito; Masanori Hashino; Rina Tanaka; Tsuyoshi Sekizuka                                                                                                                                                                                                                                                                                                                                                                                                                                                             |
| EPI_ISL_2402710, EPI_ISL_2402740, EPI_ISL_2616379, EPI_ISL_2616404, EPI_ISL_2616427, EPI_ISL_4030153, EPI_ISL_4051179, EPI_ISL_4051185, EPI_ISL_4051227, EPI_ISL_4051260, EPI_ISL_6693950, EPI_ISL_7970472                                                                                                                                                                                                                                                                                                                                                                                                                                                                                                                                                                                                                                                                                                                                                                                                               | see above                                                               | Gyocentrum                                                                                                                                 | Adam Pudekko; Agnieszka Polak; Aleksandra Skubis-Sikora; Celina Kruszniowska-Rajs; Emilia Morawiec; Jolanta Bartosiewicz- Wąsik; Magdalena Samul; Maria Maklasińska-Majdanik; Pawel Czerwiński; Robert Wojtyczka; Tomasz Wąsik                                                                                                                                                                                                                                                                                                                                                                   |
| EPI_ISL_3798599                                                                                                                                                                                                                                                                                                                                                                                                                                                                                                                                                                                                                                                                                                                                                                                                                                                                                                                                                                                                          | H Braga                                                                 | Instituto Nacional de Saude (INSA)                                                                                                         | Borges et al                                                                                                                                                                                                                                                                                                                                                                                                                                                                                                                                                                                     |
| EPI_ISL_1172011                                                                                                                                                                                                                                                                                                                                                                                                                                                                                                                                                                                                                                                                                                                                                                                                                                                                                                                                                                                                          | H Divino Espirito Santo - Ponta Delgada                                 | Instituto Nacional de Saude (INSA)                                                                                                         | Borges et al                                                                                                                                                                                                                                                                                                                                                                                                                                                                                                                                                                                     |
| EPI_ISL_3637011, EPI_ISL_5033650                                                                                                                                                                                                                                                                                                                                                                                                                                                                                                                                                                                                                                                                                                                                                                                                                                                                                                                                                                                         | H Guimaraes                                                             | Instituto Nacional de Saude (INSA)                                                                                                         | Borges et al                                                                                                                                                                                                                                                                                                                                                                                                                                                                                                                                                                                     |
| EPI_ISL_1117996                                                                                                                                                                                                                                                                                                                                                                                                                                                                                                                                                                                                                                                                                                                                                                                                                                                                                                                                                                                                          | HG Pharma GmbH                                                          | Berghaler laboratory, CeMM Research Center for Molecular Medicine of the Austrian Academy of Sciences                                      | Andreas Berghaler; Anna Schedi; Bekir Erguner; Benedikt Agerer; Christoph Bock; Jan Laine; Lukas Endler; Maelle Le Moing; Martin Senekowitsch; Michael Schuster; Thomas Penz                                                                                                                                                                                                                                                                                                                                                                                                                     |
| EPI_ISL_955249                                                                                                                                                                                                                                                                                                                                                                                                                                                                                                                                                                                                                                                                                                                                                                                                                                                                                                                                                                                                           | HGZ 2A PASO-TRONCOSO                                                    | BIOBANCO / COCTI                                                                                                                           | Arias C; Borja-Aburto VH; Grajales-Muñiz C; Grande R; Isa P; López S; Muñoz-Medina JE; Ochoa Carrera LA; Rojas-Mendoza T; Santacruz Tinoco CE; Sánchez A; Taboada B                                                                                                                                                                                                                                                                                                                                                                                                                              |
| EPI_ISL_4507842                                                                                                                                                                                                                                                                                                                                                                                                                                                                                                                                                                                                                                                                                                                                                                                                                                                                                                                                                                                                          | HIRAM CLARKE MSC - 3810 W FUQUA ST                                      | Houston Health Dept.                                                                                                                       | Adolfo Lara; Pamela Brown; Ryker Penn; Yanlai Lai                                                                                                                                                                                                                                                                                                                                                                                                                                                                                                                                                |
| EPI_ISL_2017291, EPI_ISL_2187709, EPI_ISL_3254383                                                                                                                                                                                                                                                                                                                                                                                                                                                                                                                                                                                                                                                                                                                                                                                                                                                                                                                                                                        | HLAGYN - Laboratorio de Imunologia de Transplantes de Goias             | HLAGYN - Laboratorio de Imunologia de Transplantes de Goias                                                                                | Alessandro Leonardo Alvares Magalhaes; Daniel Ferreira de Sousa; Danielle de Paiva Rezende; Erika Lopes Rocha Batista; Fernando Antonio Vinhal dos Santos; Frederico Rodrigues Vinhal; Kamila Oliveira Reis De Freitas.; Lucas Carlos Gomes Pereira; Paola Cristina Resende Silva; Raphael Bessa Parmigiani; Sabrina Sara Moreira Duarte                                                                                                                                                                                                                                                         |
| EPI_ISL_1912821                                                                                                                                                                                                                                                                                                                                                                                                                                                                                                                                                                                                                                                                                                                                                                                                                                                                                                                                                                                                          | HMH                                                                     | New York Genome Center                                                                                                                     | Andre Corvelo; Barry Kreiswirth; David Perlin; Dayna M. Oschwald; Jose Mediavilla; Kaelea Composto; Kar Chow; Liang Chen; Marcus Cunningham; Michael Zody; Samantha Fennessey; Tom Maniatis                                                                                                                                                                                                                                                                                                                                                                                                      |
| EPI_ISL_8014365                                                                                                                                                                                                                                                                                                                                                                                                                                                                                                                                                                                                                                                                                                                                                                                                                                                                                                                                                                                                          | HOSPITAL COMARCAL DE MELLILLA                                           | Instituto de Salud Carlos III                                                                                                              | A. Monzón; F. Casas; I. Jiménez; I.ROMAN SOTO; Iglesias-Caballero; M. Sandonis; P. Zaballos; S. Cuesta; S. Pozo; S. Varona; SERGIO; V. Vázquez-Morón                                                                                                                                                                                                                                                                                                                                                                                                                                             |
| EPI_ISL_6508801                                                                                                                                                                                                                                                                                                                                                                                                                                                                                                                                                                                                                                                                                                                                                                                                                                                                                                                                                                                                          | HOSPITAL DE MISERICORDIA ALTINOPOLIS                                    | Instituto Butantan                                                                                                                         | Antonio Jorge Martins; Claudia Renata dos Santos Barros; David Schlesinger; Debora Botequio Moretti; Dimas Tadeu Covas; Elaine Cristina Marqueze; Elaine Vieira Santos; Evandra Strazza Rodrigues; Heidge Fukumasu; Jayme Augusto de Souza-Neto; José Salvatore Leister Patané; Luiz Alcantara; Luiz Lehmann Coutinho; Maria Carolina Elias; Mauricio Lacerda Nogueira; Rafael dos Santos Bezerra; Raul Machado Neto; Rejane Maria Tommasini Grotto; Ricardo Haddad; Sandra Coccuzzo Sampaia Vessoni; Simone Kashima; Svetoslav Nanev Slavov; Vincent Louis Viala                                |
| EPI_ISL_5049761                                                                                                                                                                                                                                                                                                                                                                                                                                                                                                                                                                                                                                                                                                                                                                                                                                                                                                                                                                                                          | HOSPITAL ENF ANTONIO POLICARPO DE OLIVEIRA                              | Instituto Butantan                                                                                                                         | Antonio Jorge Martins; Claudia Renata dos Santos Barros; David Schlesinger; Debora Botequio Moretti; Dimas Tadeu Covas; Elaine Cristina Marqueze; Elaine Vieira Santos; Evandra Strazza Rodrigues; Heidge Fukumasu; Jayme Augusto de Souza-Neto; José Salvatore Leister Patané; Luiz Alcantara; Luiz Lehmann Coutinho; Maria Carolina Elias; Mauricio Lacerda Nogueira; Rafael dos Santos Bezerra; Raul Machado Neto; Rejane Maria Tommasini Grotto; Ricardo Haddad; Sandra Coccuzzo Sampaia Vessoni; Simone Kashima; Svetoslav Nanev Slavov; Vincent Louis Viala                                |
| EPI_ISL_4799576                                                                                                                                                                                                                                                                                                                                                                                                                                                                                                                                                                                                                                                                                                                                                                                                                                                                                                                                                                                                          | HOSPITAL GENERAL UNIVERSITARIO DE ALBACETE                              | Instituto de Salud Carlos III                                                                                                              | A. Monzón; CARIDAD; F. Casas; I. Jiménez; I. SAINZ DE BARANDA CAMINO; M. Camarero; P. Zaballos; S. Cuesta; S. Iglesias-Caballero; S. Pozo; S. Varona; Sandonis; V. Vázquez-Morón                                                                                                                                                                                                                                                                                                                                                                                                                 |
| EPI_ISL_3374306                                                                                                                                                                                                                                                                                                                                                                                                                                                                                                                                                                                                                                                                                                                                                                                                                                                                                                                                                                                                          | HOSPITAL MUN DR GUIDO GUIDA                                             | Instituto Butantan                                                                                                                         | Antonio Jorge Martins; Claudia Renata dos Santos Barros; David Schlesinger; Debora Botequio Moretti; Dimas Tadeu Covas; Elaine Cristina Marqueze; Elaine Vieira Santos; Evandra Strazza Rodrigues; Heidge Fukumasu; Jayme Augusto de Souza-Neto; José Salvatore Leister Patané; Luiz Alcantara; Luiz Lehmann Coutinho; Maria Carolina Elias; Mauricio Lacerda Nogueira; Rafael dos Santos Bezerra; Raul Machado Neto; Rejane Maria Tommasini Grotto; Ricardo Haddad; Sandra Coccuzzo Sampaia Vessoni; Simone Kashima; Svetoslav Nanev Slavov; Vincent Louis Viala                                |
| EPI_ISL_4298214                                                                                                                                                                                                                                                                                                                                                                                                                                                                                                                                                                                                                                                                                                                                                                                                                                                                                                                                                                                                          | HOSPITAL MUNICIPAL DE IBIUNA IBIUNA SP                                  | Instituto Butantan                                                                                                                         | Antonio Jorge Martins; Claudia Renata dos Santos Barros; David Schlesinger; Debora Botequio Moretti; Dimas Tadeu Covas; Elaine Cristina Marqueze; Elaine Vieira Santos; Evandra Strazza Rodrigues; Heidge Fukumasu; Jayme Augusto de Souza-Neto; José Salvatore Leister Patané; Luiz Alcantara; Luiz Lehmann Coutinho; Maria Carolina Elias; Mauricio Lacerda Nogueira; Rafael dos Santos Bezerra; Raul Machado Neto; Rejane Maria Tommasini Grotto; Ricardo Haddad; Sandra Coccuzzo Sampaia Vessoni; Simone Kashima; Svetoslav Nanev Slavov; Vincent Louis Viala                                |
| EPI_ISL_8926698                                                                                                                                                                                                                                                                                                                                                                                                                                                                                                                                                                                                                                                                                                                                                                                                                                                                                                                                                                                                          | HOSPITAL MUNICIPAL DE ILHABELA GOV MARIO COVAS JR                       | Instituto Butantan                                                                                                                         | Antonio Jorge Martins; Claudia Renata dos Santos Barros; David Schlesinger; Debora Botequio Moretti; Dimas Tadeu Covas; Elaine Cristina Marqueze; Elaine Vieira Santos; Evandra Strazza Rodrigues; Heidge Fukumasu; Jayme Augusto de Souza-Neto; José Salvatore Leister Patané; Luiz Alcantara; Luiz Lehmann Coutinho; Maria Carolina Elias; Mauricio Lacerda Nogueira; Rafael dos Santos Bezerra; Raul Machado Neto; Rejane Maria Tommasini Grotto; Ricardo Haddad; Sandra Coccuzzo Sampaia Vessoni; Simone Kashima; Svetoslav Nanev Slavov; Vincent Louis Viala                                |
| EPI_ISL_6474309, EPI_ISL_6474388, EPI_ISL_8058053                                                                                                                                                                                                                                                                                                                                                                                                                                                                                                                                                                                                                                                                                                                                                                                                                                                                                                                                                                        | HOSPITAL MUNICIPAL JOSE GONCALVES ROSA                                  | ACME Lab, Oswaldo Cruz Foundation, FIOCRUZ/CE                                                                                              | Carlos Leonardo de Aragao Araujo; Cecilia Leite Costa & Eduardo Ruback dos Santos on behalf of COVID-19 FIOCRUZ Genetic Network; Cleber Furtado Akshens; Fabio Miyajima; Fernando Braga Stehling; Igor Oliveira Duarte; Jamille Maria Mendes Bezerra; Joaquin Cesar do Nascimento Sousa Junior; Thais Ferreira de Oliveira; Thais Ferreira de Oliveira; Thais de Oliveira Costa; Ticiane Cavalcante de Souza; Veridiana Pessoa Miyajima                                                                                                                                                          |
| EPI_ISL_1261506, EPI_ISL_1665146                                                                                                                                                                                                                                                                                                                                                                                                                                                                                                                                                                                                                                                                                                                                                                                                                                                                                                                                                                                         | HOSPITAL UNIV. MIGUEL SERVET                                            | Instituto de Salud Carlos III                                                                                                              | A; A. Monzón; ANA MARIA; F. Casas; I. Jiménez; I. Milagro; I.MILAGRO BEAMONTE; M. Camarero; M. Sandonis; P. Zaballos; S. Cuesta; S. Iglesias-Caballero; S. Pozo; S. Varona; Sandonis; V. Camarero; V. Vázquez-Morón; Vázquez-Morón                                                                                                                                                                                                                                                                                                                                                               |
| EPI_ISL_5515539                                                                                                                                                                                                                                                                                                                                                                                                                                                                                                                                                                                                                                                                                                                                                                                                                                                                                                                                                                                                          | HOSPITAL UNIVERSITARIO 12 DE OCTUBRE                                    | HOSPITAL UNIVERSITARIO 12 DE OCTUBRE                                                                                                       | Carmen Martín-Higuera; Esther Viedma; Irene Muñoz-Gallego; M.ª Dolores Folgueira; Mar Aguilera; Noelia Moral; Rafael Delgado; Sagrario Zurita                                                                                                                                                                                                                                                                                                                                                                                                                                                    |
| EPI_ISL_4193964                                                                                                                                                                                                                                                                                                                                                                                                                                                                                                                                                                                                                                                                                                                                                                                                                                                                                                                                                                                                          | HOSPITAL UNIVERSITARIO CENTRAL DE ASTURIAS                              | Laboratorio de Virología HUCA                                                                                                              | ; Alba L; Alvarez-Arguelles ME; Boga JA; Costales I; Coto E; González-Alba JM; Gómez de Oña J; Martín-Rodríguez G; Melón S; Perez-Martinez Z; Rojo S; Sandoval M                                                                                                                                                                                                                                                                                                                                                                                                                                 |
| EPI_ISL_2020153, EPI_ISL_2134901, EPI_ISL_2438714, EPI_ISL_7624206                                                                                                                                                                                                                                                                                                                                                                                                                                                                                                                                                                                                                                                                                                                                                                                                                                                                                                                                                       | HOSPITAL UNIVERSITARIO SON ESPASES                                      | HOSPITAL UNIVERSITARIO SON ESPASES                                                                                                         | Antonio Oliver; Carla López-Causapé; Dr. Antonio Oliver; Dr. Carla López-Causapé; Dr. Gabriel Cabot; Hospital Universitario Son Espases; Pablo Fraile-Ribot; SeqCovid; Servicio de Microbiología; on behalf of Servicio de Microbiología                                                                                                                                                                                                                                                                                                                                                         |
| EPI_ISL_2193542                                                                                                                                                                                                                                                                                                                                                                                                                                                                                                                                                                                                                                                                                                                                                                                                                                                                                                                                                                                                          | Hackensack Medical Center                                               | New York Genome Center                                                                                                                     | Andre Corvelo; Barry Kreiswirth; David Perlin; Dayna M. Oschwald; Jose Mediavilla; Kaelea Composto; Kar Chow; Liang Chen; Marcus Cunningham; Michael Zody; Samantha Fennessey; Tom Maniatis                                                                                                                                                                                                                                                                                                                                                                                                      |
| EPI_ISL_3375195, EPI_ISL_4195306, EPI_ISL_6347342, EPI_ISL_8610609, EPI_ISL_8888885                                                                                                                                                                                                                                                                                                                                                                                                                                                                                                                                                                                                                                                                                                                                                                                                                                                                                                                                      | Haukeland University Hospital, Dept. of Microbiology                    | Norwegian Institute of Public Health, Department of Virology                                                                               | Atiya R Ali; Debech Nadia; Engebretsen Serina Beate; Garcia Lorente Ignacio; Hilde Elshaug; Hilde Vollan; Jon Bråte; Kamilla Heddeland Instefjord; Karoline Bragstad; Kathrine Steene-Johansen; Line Victoria Moen; Marie Paulsen Madsen; Olav Hungnes; Pedersen Benedikte Nevjen; Rasmus Riis Kopperud                                                                                                                                                                                                                                                                                          |
| EPI_ISL_2006604, EPI_ISL_2468538, EPI_ISL_2639022, EPI_ISL_2806375, EPI_ISL_2963188, EPI_ISL_2963321, EPI_ISL_3287509, EPI_ISL_3335147, EPI_ISL_3581555, EPI_ISL_4763606, EPI_ISL_6837812                                                                                                                                                                                                                                                                                                                                                                                                                                                                                                                                                                                                                                                                                                                                                                                                                                | see above                                                               | Health Services Laboratories                                                                                                               | Cordelia Langford; David K. Jackson; Dominic Kwiatkowski; Ewan Harrison; Health Services Laboratories and Alex Alderton; Ian Johnston; Jeffrey Barrett; John Sillitoe on behalf of the Wellcome Sanger Institute COVID-19 Surveillance Team; Roberto Amato; Sonia Gonçalves                                                                                                                                                                                                                                                                                                                      |
| EPI_ISL_3506428                                                                                                                                                                                                                                                                                                                                                                                                                                                                                                                                                                                                                                                                                                                                                                                                                                                                                                                                                                                                          | Heideveld Emergency Centre                                              | NHLS/UCT                                                                                                                                   | Arash Iranzadeh; Bruna Galvao; Carolyn Williamson; Deelan Doolabh; Diana Hardie; Gert Marais; Innocent Mudau; Lynn Tyers; Marvin Hsiao; Rageama Joseph; Stephen Korsman                                                                                                                                                                                                                                                                                                                                                                                                                          |
| EPI_ISL_5144968, EPI_ISL_5200781, EPI_ISL_5201536, EPI_ISL_5201960, EPI_ISL_5202805, EPI_ISL_5203119, EPI_ISL_5203216, EPI_ISL_5203464, EPI_ISL_5204996, EPI_ISL_5204998, EPI_ISL_6411110, EPI_ISL_6415892, EPI_ISL_6416680, EPI_ISL_6416910, EPI_ISL_6477226, EPI_ISL_6477295, EPI_ISL_6477071, EPI_ISL_6477226, EPI_ISL_6481384, EPI_ISL_6483923, EPI_ISL_6485054, EPI_ISL_6485434, EPI_ISL_6486386, EPI_ISL_6486753, EPI_ISL_6487125, EPI_ISL_6487366, EPI_ISL_6487949, EPI_ISL_6488420, EPI_ISL_6633010, EPI_ISL_6633165, EPI_ISL_6633262, EPI_ISL_6634000, EPI_ISL_6788239, EPI_ISL_6887578, EPI_ISL_6887616, EPI_ISL_6887690, EPI_ISL_6902557, EPI_ISL_6902928, EPI_ISL_7127647, EPI_ISL_7128409, EPI_ISL_7256082, EPI_ISL_7257481, EPI_ISL_7311157, EPI_ISL_7497150, EPI_ISL_7497760, EPI_ISL_7694524, EPI_ISL_7694783, EPI_ISL_7694829, EPI_ISL_7694991, EPI_ISL_7697514, EPI_ISL_7942121, EPI_ISL_7942665, EPI_ISL_7944139, EPI_ISL_8316499, EPI_ISL_8426979, EPI_ISL_8427826, EPI_ISL_8550367, EPI_ISL_9042933 | see above                                                               | Helix                                                                                                                                      | Benjamin Rambo-Martin; Christopher Gulwick; Clinton Paden; Dakota Howard; Dhvani Batra; Duncan MacCannell; Erisa Sula; Helix CA; Jason Caravas; Kristine Lacey; Matthew Schmerer; Peter Cook; Scott Sammons; Shatavia Morrison; Tymekcia Kendall; Victoria Caban Figueroa; Yvette Unoarumhi                                                                                                                                                                                                                                                                                                      |
| EPI_ISL_850918                                                                                                                                                                                                                                                                                                                                                                                                                                                                                                                                                                                                                                                                                                                                                                                                                                                                                                                                                                                                           | Helix // Illumina                                                       | Genomics and Discovery, Respiratory Viruses Branch, Division of Viral Diseases, Centers for Disease Control and Prevention                 | Alexandre Bolze; Ary Ascencio; Ben L. Rambo-Martin Eileen de Feo; Brad Sickler; Charlotte Rivera-Garcia; Christine Tran; Clinton R. Paden; Diana Becker; Dhvani Batra; Duncan MacCannell; Efrén Sandoval; Elizabeth Cirulli; Eric Allen; Geraint Lewan; James Lu; Jan Antico; Jason Nguyen; Jimmy Ramirez; Jingtao Liu; Kelly Schiabor Barrett; Kim Gietzen; Magnus Isaksson; Marc Laurent; Matthew Tolentino; Nicole L. Washington; Peter W. Cook; Phil Febbo; Ryan Chou; Shannon Wickline; Sherry Wang; Simon White; Summer Galloway; Suxiang Tong; Tyler Cassens; William Lee                 |
| EPI_ISL_1089364                                                                                                                                                                                                                                                                                                                                                                                                                                                                                                                                                                                                                                                                                                                                                                                                                                                                                                                                                                                                          | Helix // Illumina                                                       | Respiratory Viruses Branch, Division of Viral Diseases, Centers for Disease Control and Prevention                                         | Alexandre Bolze; Ary Ascencio; Ben L. Rambo-Martin; Brad Sickler; Charlotte Rivera-Garcia; Christine Tran; Clinton R. Paden; Dakota Howard; Diana Becker; Dhvani Batra; Duncan MacCannell; Efrén Sandoval; Eileen de Feo; Elizabeth Cirulli; Eric Allen; Geraint Lewan; James Lu; Jan Antico; Jason Nguyen; Jimmy Ramirez; Jingtao Liu; Kelly Schiabor Barrett; Kim Gietzen; Magnus Isaksson; Marc Laurent; Matthew Tolentino; Nicole L. Washington; Peter W. Cook; Phil Febbo; Ryan Chou; Shannon Wickline; Sherry Wang; Simon White; Summer Galloway; Suxiang Tong; Tyler Cassens; William Lee |
| EPI_ISL_1262212, EPI_ISL_1262420, EPI_ISL_1267987, EPI_ISL_1269940, EPI_ISL_1270659, EPI_ISL_1270782, EPI_ISL_1338230, EPI_ISL_1480109, EPI_ISL_1480458, EPI_ISL_1493879, EPI_ISL_1512309, EPI_ISL_1512716, EPI_ISL_1553587, EPI_ISL_1554966, EPI_ISL_1580818, EPI_ISL_1580950, EPI_ISL_1593027, EPI_ISL_1679744, EPI_ISL_1690568, EPI_ISL_1690677, EPI_ISL_1690771, EPI_ISL_1690931, EPI_ISL_1796770, EPI_ISL_1797060, EPI_ISL_1804018, EPI_ISL_1804492, EPI_ISL_1804620, EPI_ISL_1907404, EPI_ISL_1907767, EPI_ISL_1907870, EPI_ISL_1990743, EPI_ISL_1990890, EPI_ISL_1991201, EPI_ISL_1991548, EPI_ISL_1991701, EPI_ISL_2009889, EPI_ISL_2010430, EPI_ISL_2010638, EPI_ISL_2097539, EPI_ISL_2097677, EPI_ISL_2097873, EPI_ISL_2145330,                                                                                                                                                                                                                                                                                | see above                                                               | Helix                                                                                                                                      | Benjamin Rambo-Martin; Christopher Gulwick; Clinton Paden; Dakota Howard; Dhvani Batra; Duncan MacCannell; Erisa Sula; Helix CA; Jason Caravas; Kristine Lacey; Matthew Schmerer; Peter Cook; Scott Sammons; Shatavia Morrison; Tymekcia Kendall; Victoria Caban Figueroa; Yvette Unoarumhi                                                                                                                                                                                                                                                                                                      |

|                                                                                                                                                                                                                                                                                                                                                                                                                                                                                                                                                                                                                                                                                                                                                                                                                                                                                                                                                                                                                                                                                                                                                                                                                                            |                                                                                                                                      |                            |                                                                                                                                            |                                                                                                                                                                                                                                                                                                                                                                                                                                                                                                                                                                                                                                                                                                                                                                                                                                                                                       |
|--------------------------------------------------------------------------------------------------------------------------------------------------------------------------------------------------------------------------------------------------------------------------------------------------------------------------------------------------------------------------------------------------------------------------------------------------------------------------------------------------------------------------------------------------------------------------------------------------------------------------------------------------------------------------------------------------------------------------------------------------------------------------------------------------------------------------------------------------------------------------------------------------------------------------------------------------------------------------------------------------------------------------------------------------------------------------------------------------------------------------------------------------------------------------------------------------------------------------------------------|--------------------------------------------------------------------------------------------------------------------------------------|----------------------------|--------------------------------------------------------------------------------------------------------------------------------------------|---------------------------------------------------------------------------------------------------------------------------------------------------------------------------------------------------------------------------------------------------------------------------------------------------------------------------------------------------------------------------------------------------------------------------------------------------------------------------------------------------------------------------------------------------------------------------------------------------------------------------------------------------------------------------------------------------------------------------------------------------------------------------------------------------------------------------------------------------------------------------------------|
| EPI_ISL_2247858, EPI_ISL_2270498, EPI_ISL_2320724, EPI_ISL_2320797, EPI_ISL_2440504, EPI_ISL_2599074, EPI_ISL_4346449, EPI_ISL_4346588, EPI_ISL_4347654, EPI_ISL_4962183, EPI_ISL_4962484                                                                                                                                                                                                                                                                                                                                                                                                                                                                                                                                                                                                                                                                                                                                                                                                                                                                                                                                                                                                                                                  | see above                                                                                                                            | Helix/Illumina             | Centers for Disease Control and Prevention Division of Viral Diseases, Pathogen Discovery                                                  | Adrian Paskey; Alexandre Bolze; Ary Ascencio; Ben L. Rambo-Martin; Benjamin Rambo-Martin; Brad Sickler; Charlotte Rivera-Garcia; Christine Tran; Christopher Gulvick; Chrstine Tran; Clinton Paden; Clinton R. Paden; Dakota Howard; Darlene Wagner; David Becker; Dhvani Batra; Duncan MacCannell; Efrén Sandoval; Eileen De Feo; Eileen de Feo; Elizabeth Cirulli; Eric Allen; Geraint Levan; James Lu; Jan Antico; Jason Caravas; Jason Nguyen; Jimmy Ramirez; Jingtao Liu; Kara Moser; Kelly Barrett; Kelly Schiabor Barrett; Kim Gietzen; Kristine Lacey; Magnus Isaksson; Marc Laurent; Matthew Schmerer; Matthew Tolentino; Nicole L. Washington; Nicole Washington; Peter Cook; Peter W. Cook; Phil Febbo; Ryan Cho; Scott Sammons; Shannon Wickline; Shatavia Morrison; Sherry Wang; Simon White; Summer Galloway; Suxiang Tong; Tyler Cassens; William Lee; Yvette Unoarumi |
| EPI_ISL_967283, EPI_ISL_1016839, EPI_ISL_1134248, EPI_ISL_1134410, EPI_ISL_1134435                                                                                                                                                                                                                                                                                                                                                                                                                                                                                                                                                                                                                                                                                                                                                                                                                                                                                                                                                                                                                                                                                                                                                         |                                                                                                                                      | Helix/Illumina             | Respiratory Viruses Branch, Division of Viral Diseases, Centers for Disease Control and Prevention                                         | ; Alexandre Bolze; Ary Ascencio; Ben L. Rambo-Martin; Brad Sickler; Charlotte Rivera-Garcia; Christine Tran; Clinton R. Paden; Dakota Howard; David Becker; Dhvani Batra; Duncan MacCannell; Efrén Sandoval; Eileen de Feo; Elizabeth Cirulli; Eric Allen; Geraint Levan; James Lu; Jan Antico; Jason Nguyen; Jimmy Ramirez; Jingtao Liu; Kelly Schiabor Barrett; Kim Gietzen; Magnus Isaksson; Marc Laurent; Matthew Tolentino; Nicole L. Washington; Peter W. Cook; Phil Febbo; Ryan Cho; Shannon Wickline; Sherry Wang; Simon White; Summer Galloway; Suxiang Tong; Tyler Cassens; William Lee                                                                                                                                                                                                                                                                                     |
| EPI_ISL_7638334                                                                                                                                                                                                                                                                                                                                                                                                                                                                                                                                                                                                                                                                                                                                                                                                                                                                                                                                                                                                                                                                                                                                                                                                                            | Hellenic National Blood Transfusion Center - EKEA                                                                                    |                            | Greek Genome Center, Biomedical Research Foundation of the Academy of Athens (BRFAA)                                                       | Dimitrios Thanos; Dimitris Vrachnos; Eftimia Petinaki; Emmanouil Athanasiadis; Giannis Vatsellas; Katerina Zoi; Kostas Stamoulis; Theodoros Loupis                                                                                                                                                                                                                                                                                                                                                                                                                                                                                                                                                                                                                                                                                                                                    |
| EPI_ISL_700022, EPI_ISL_700110                                                                                                                                                                                                                                                                                                                                                                                                                                                                                                                                                                                                                                                                                                                                                                                                                                                                                                                                                                                                                                                                                                                                                                                                             | Hematopathology Laboratory, ACTREC, TMC                                                                                              |                            | Hematopathology Laboratory, ACTREC, TMC                                                                                                    | ACTREC; Hematopathology Laboratory                                                                                                                                                                                                                                                                                                                                                                                                                                                                                                                                                                                                                                                                                                                                                                                                                                                    |
| EPI_ISL_1147605                                                                                                                                                                                                                                                                                                                                                                                                                                                                                                                                                                                                                                                                                                                                                                                                                                                                                                                                                                                                                                                                                                                                                                                                                            | Herz- und Diabeteszentrum NRW: Universitätsklinik der Ruhr-Universität Bochum -> Institut für Laboratoriums- und Transfusionsmedizin |                            | Robert Koch Institute                                                                                                                      |                                                                                                                                                                                                                                                                                                                                                                                                                                                                                                                                                                                                                                                                                                                                                                                                                                                                                       |
| EPI_ISL_3186800, EPI_ISL_3502002, EPI_ISL_3539512, EPI_ISL_3834096, EPI_ISL_6267940                                                                                                                                                                                                                                                                                                                                                                                                                                                                                                                                                                                                                                                                                                                                                                                                                                                                                                                                                                                                                                                                                                                                                        | Histopath                                                                                                                            |                            | NSW Health Pathology - Institute of Clinical Pathology and Medical Research; Westmead Hospital; University of Sydney                       | Arnott A.; Draper J.; Gall M.; Martinez E.; Rockett R.; Sintchenko V.; on behalf of ICPMR                                                                                                                                                                                                                                                                                                                                                                                                                                                                                                                                                                                                                                                                                                                                                                                             |
| EPI_ISL_2884708, EPI_ISL_3875960, EPI_ISL_4642735                                                                                                                                                                                                                                                                                                                                                                                                                                                                                                                                                                                                                                                                                                                                                                                                                                                                                                                                                                                                                                                                                                                                                                                          | Hokkaido Institute of Public Health                                                                                                  |                            | Hokkaido Institute of Public Health                                                                                                        | Kazuhiro Okubo; Kentaro Itokawa; Makoto Kuroda; Masanori Hashino; Rina Tanaka; Tsuyoshi Sekizuka; Yuta Ohno                                                                                                                                                                                                                                                                                                                                                                                                                                                                                                                                                                                                                                                                                                                                                                           |
| EPI_ISL_1001373, EPI_ISL_8789655                                                                                                                                                                                                                                                                                                                                                                                                                                                                                                                                                                                                                                                                                                                                                                                                                                                                                                                                                                                                                                                                                                                                                                                                           | Hopital                                                                                                                              |                            | National Reference Center for Viruses of Respiratory Infections, Institut Pasteur, Paris                                                   | Angela Brisebarre; Camille Capel; Camélia MOKHTARI - MERCIER; Christophe Malabat; Corinne Maufrays; Etienne Simon-Lorière; Frédéric Lemoine; Julien Fume; Laplanche Sophie; Louise Lefrançois; Marion Barbet; Maud Vanpeene; Méline Bizard; Slim El Khiairi; Sylvie Behillil; Sylvie Van der Werf; Sylvie van der Werf; Vincent Enouf                                                                                                                                                                                                                                                                                                                                                                                                                                                                                                                                                 |
| EPI_ISL_1416999, EPI_ISL_1517023, EPI_ISL_1583150, EPI_ISL_1789040, EPI_ISL_2464100, EPI_ISL_3690135, EPI_ISL_4236954, EPI_ISL_5945816                                                                                                                                                                                                                                                                                                                                                                                                                                                                                                                                                                                                                                                                                                                                                                                                                                                                                                                                                                                                                                                                                                     | see above                                                                                                                            | Hospital                   | National Reference Center for Viruses of Respiratory Infections, Institut Pasteur, Paris                                                   | Angela Brisebarre; Anne Holstein; Camille Capel; Christophe Malabat; Corinne Maufrays; Céline Bressollette; Dominique Descamps; Etienne Simon-Lorière; FAGOUR Laurence; Frédéric Lemoine; Hub de Bioinformatique et Biostatistique; Ilka Engelmann; Julien Fume; Jérôme Guinard; Louise Lefrançois; Marion Barbet; Maud Vanpeene; Méline Bizard; Nabil Gastli; Slim El Khiairi; Sylvie Behillil; Sylvie Van der Werf; Sylvie van der Werf; Thibault Guinoiseau; Vincent Enouf                                                                                                                                                                                                                                                                                                                                                                                                         |
| EPI_ISL_1383949, EPI_ISL_7791705                                                                                                                                                                                                                                                                                                                                                                                                                                                                                                                                                                                                                                                                                                                                                                                                                                                                                                                                                                                                                                                                                                                                                                                                           | Hospital Center Emile Mayrisch                                                                                                       |                            | Laboratoire national de sante, Microbiologie, Microbial Genomics Platform                                                                  | Anke Wienecke-Baldacchino; Catherine Ragimbeau; Cynthia Oxacelay; Elodie Solarino; Fatu Djabi; Jessica Tapp; Lise Pignon; Raoul Salmon; SibelCatherine Ragimbeau; Tamir Abdelrahman; Virginie Jover                                                                                                                                                                                                                                                                                                                                                                                                                                                                                                                                                                                                                                                                                   |
| EPI_ISL_1384048                                                                                                                                                                                                                                                                                                                                                                                                                                                                                                                                                                                                                                                                                                                                                                                                                                                                                                                                                                                                                                                                                                                                                                                                                            | Hospital Center Luxembourg                                                                                                           |                            | Laboratoire national de sante, Microbiologie, Microbial Genomics Platform                                                                  | Anke Wienecke-Baldacchino; Catherine Ragimbeau; Fatu Djabi; Jean-Hugues Francois; Jessica Tapp; Lise Pignon; Michel Kohlen; Raoul Salmon; Tamir Abdelrahman                                                                                                                                                                                                                                                                                                                                                                                                                                                                                                                                                                                                                                                                                                                           |
| EPI_ISL_539539                                                                                                                                                                                                                                                                                                                                                                                                                                                                                                                                                                                                                                                                                                                                                                                                                                                                                                                                                                                                                                                                                                                                                                                                                             | Hospital Clinic                                                                                                                      |                            | Instituto de Salud Carlos III                                                                                                              | A. Monzón; F. Casas; I. I. Jiménez; Iglesias-Caballero; M. Camarero; M. Cuesta; M. González-Esguevillas; M. Molinero Calamita; M. Zaballos; M.A Marcos; P. Jiménez; S. Juliá; S. Pozo; S. Varona                                                                                                                                                                                                                                                                                                                                                                                                                                                                                                                                                                                                                                                                                      |
| EPI_ISL_467272, EPI_ISL_467297                                                                                                                                                                                                                                                                                                                                                                                                                                                                                                                                                                                                                                                                                                                                                                                                                                                                                                                                                                                                                                                                                                                                                                                                             | Hospital Clínico Universitario de Santiago de Compostela                                                                             |                            | SeqCOVID-SPAIN consortium/IBV(CSIC)                                                                                                        | Amparo Coira Nieto; Antonio Aguilera Guirao; Gema Barbeito Castiñeiras; José Javier Costa Alcalde; Mª Luisa Pérez del Molino Bernal; Rocío Trastoy Pena and SeqCOVID-SPAIN consortium                                                                                                                                                                                                                                                                                                                                                                                                                                                                                                                                                                                                                                                                                                 |
| EPI_ISL_2304180, EPI_ISL_4396034                                                                                                                                                                                                                                                                                                                                                                                                                                                                                                                                                                                                                                                                                                                                                                                                                                                                                                                                                                                                                                                                                                                                                                                                           | Hospital General Universitario Gregorio Marañón                                                                                      |                            | Hospital General Universitario Gregorio Marañón                                                                                            | Cristina Rodríguez-Grande; Darío García de Viedma; Julia Suárez; Laura Pérez-Lago; Marta Herranz Martin; Patricia Muñoz; Pedro Sola Campoy; Pilar Catalán; Sergio Buenestado Serrano; Víctor Manuel de la Cueva                                                                                                                                                                                                                                                                                                                                                                                                                                                                                                                                                                                                                                                                       |
| EPI_ISL_1272492, EPI_ISL_1272501                                                                                                                                                                                                                                                                                                                                                                                                                                                                                                                                                                                                                                                                                                                                                                                                                                                                                                                                                                                                                                                                                                                                                                                                           | Hospital General Universitario Gregorio Marañón                                                                                      |                            | SeqCOVID-SPAIN consortium/IBV(CSIC)                                                                                                        | Darío García de Viedma; Julia Suárez; Laura Pérez-Lago; Marta Herranz; Patricia Muñoz and SeqCOVID-SPAIN consortium; Pedro J Sola-Campoy; Pilar Catalán; Sergio Buenestado-Serrano; Víctor Manuel de la Cueva                                                                                                                                                                                                                                                                                                                                                                                                                                                                                                                                                                                                                                                                         |
| EPI_ISL_2271515, EPI_ISL_2271525, EPI_ISL_3216218                                                                                                                                                                                                                                                                                                                                                                                                                                                                                                                                                                                                                                                                                                                                                                                                                                                                                                                                                                                                                                                                                                                                                                                          | Hospital General Universitario de Alicante - Instituto de Investigación Sanitaria y Biomédica de Alicante                            |                            | SeqCOVID-SPAIN consortium/IBV(CSIC)                                                                                                        | Carmen Molina Pardines and SeqCOVID-SPAIN consortium; Maripaz Ventero Martín                                                                                                                                                                                                                                                                                                                                                                                                                                                                                                                                                                                                                                                                                                                                                                                                          |
| EPI_ISL_882621, EPI_ISL_802776                                                                                                                                                                                                                                                                                                                                                                                                                                                                                                                                                                                                                                                                                                                                                                                                                                                                                                                                                                                                                                                                                                                                                                                                             | Hospital Ramón y Cajal<br>Hospital Santa María Nai                                                                                   |                            | Hospital Ramón y Cajal<br>Instituto de Salud Carlos III                                                                                    | Concepción Rodríguez; JC Galán; José M Gonzalez-Alba; Laura Martínez; Luz Leticia Olavarrieta; Melanie Abreu; Rafael Cantón; Val F Lanza                                                                                                                                                                                                                                                                                                                                                                                                                                                                                                                                                                                                                                                                                                                                              |
| EPI_ISL_6706745                                                                                                                                                                                                                                                                                                                                                                                                                                                                                                                                                                                                                                                                                                                                                                                                                                                                                                                                                                                                                                                                                                                                                                                                                            | Hospital Universitari Dr. Josep Trueta                                                                                               |                            | Institut d'Investigació Biomèdica de Girona   Hospital Universitari Dr. Josep Trueta                                                       | A. Monzón; F. Casas; I. I. Jiménez; Iglesias-Caballero; J. García.; M. Camarero; M. Cuesta; M. González-Esguevillas; M. Molinero Calamita; M. Zaballos; P. Jiménez; S. Juliá; S. Pozo; S. Varona<br>Bernat del Olmo; Mel·lina Pinsach; Meritxell Deulofeu; Nuria Esther Neto; Paula Costa                                                                                                                                                                                                                                                                                                                                                                                                                                                                                                                                                                                             |
| EPI_ISL_1080829, EPI_ISL_1391160, EPI_ISL_2712843, EPI_ISL_5431932, EPI_ISL_6035887                                                                                                                                                                                                                                                                                                                                                                                                                                                                                                                                                                                                                                                                                                                                                                                                                                                                                                                                                                                                                                                                                                                                                        | Hospital Universitari Vall d'Hebron - Vall d'Hebron Institut de Recerca                                                              |                            | Hospital Universitari Vall d'Hebron - Vall d'Hebron Institut de Recerca                                                                    | Alejandra González-Sánchez; Andrés Antón; Ariadna Rando; Carla Castillo; Cristina Andrés; Damir García-Cehic; Josep F Abril; Josep Quer; Juliana Esperalba; Karen García; María Carmen Martin; María Gema Codina; María Piñana; Rodrigo Vázquez; Tomás Pumarola                                                                                                                                                                                                                                                                                                                                                                                                                                                                                                                                                                                                                       |
| EPI_ISL_2135494                                                                                                                                                                                                                                                                                                                                                                                                                                                                                                                                                                                                                                                                                                                                                                                                                                                                                                                                                                                                                                                                                                                                                                                                                            | Hospital Universitari i Politècnic La Fe de València                                                                                 |                            | SeqCOVID-SPAIN consortium/IBV(CSIC)                                                                                                        | Ana Gil Brusola; Eva González Barberá; José Luis López Hontangas and SeqCOVID-SPAIN consortium; María Dolores Gómez Ruiz; Salvador Giner Almaraz                                                                                                                                                                                                                                                                                                                                                                                                                                                                                                                                                                                                                                                                                                                                      |
| EPI_ISL_7935555                                                                                                                                                                                                                                                                                                                                                                                                                                                                                                                                                                                                                                                                                                                                                                                                                                                                                                                                                                                                                                                                                                                                                                                                                            | Hospital Universitari i Politècnic La Fe de València                                                                                 |                            | Virology Laboratory, FISABIO - Public Health, Generalitat Valenciana                                                                       | Alessandra Franze; Ana Gil-Brusola; Beatriz Mengual-Chulí; Eva González-Barberá; F. Xavier López-Labrador; Javier Díez-Domingo; Jose Luis López-Hontangas; Laura Cano; María Dolores Gómez-Ruiz; Nuria Jiménez-Esteban; Salvador Giner-Almaraz; Sandra García-Esteban                                                                                                                                                                                                                                                                                                                                                                                                                                                                                                                                                                                                                 |
| EPI_ISL_428679                                                                                                                                                                                                                                                                                                                                                                                                                                                                                                                                                                                                                                                                                                                                                                                                                                                                                                                                                                                                                                                                                                                                                                                                                             | Hospital Universitario La Paz                                                                                                        |                            | Hospital Universitario 12 de Octubre                                                                                                       | Elias Dahdouh; Esther Viedma; Fernando Lázaro; Jesús Minguero; Juan Carlos Galán; Julio García; Mª Dolores Folgueira; Natalia Stella; Rafael Cantón; Rafael Delgado; Raúl Recio; Sara González                                                                                                                                                                                                                                                                                                                                                                                                                                                                                                                                                                                                                                                                                        |
| EPI_ISL_5030534, EPI_ISL_5327605, EPI_ISL_5524278                                                                                                                                                                                                                                                                                                                                                                                                                                                                                                                                                                                                                                                                                                                                                                                                                                                                                                                                                                                                                                                                                                                                                                                          | Hospital Universitario Marqués de Valdecilla                                                                                         |                            | Servicio de Microbiología. Hospital Universitario Marqués de Valdecilla                                                                    | Javier Freire Salinas; Jesús Agüero Balbín; Jesús Rodríguez Lozano; Jorge Calvo Montes; Mónica Gozalo Marguello; Sergio Garcia Fernandez                                                                                                                                                                                                                                                                                                                                                                                                                                                                                                                                                                                                                                                                                                                                              |
| EPI_ISL_1423629                                                                                                                                                                                                                                                                                                                                                                                                                                                                                                                                                                                                                                                                                                                                                                                                                                                                                                                                                                                                                                                                                                                                                                                                                            | Hospital Universitario Marqués de Valdecilla - IDIVAL (Santander, Cantabria)                                                         |                            | SeqCOVID-SPAIN consortium/IBV(CSIC)                                                                                                        | Daniel Pablo Marcos; Jesús Rodríguez Rodríguez; Jose Manuel Méndez Legaza; María Eliecer Cano García; María Siller Ruiz and SeqCOVID-SPAIN consortium; Mónica Gozalo Marguello                                                                                                                                                                                                                                                                                                                                                                                                                                                                                                                                                                                                                                                                                                        |
| EPI_ISL_2271345                                                                                                                                                                                                                                                                                                                                                                                                                                                                                                                                                                                                                                                                                                                                                                                                                                                                                                                                                                                                                                                                                                                                                                                                                            | Hospital Universitario Virgen de las Nieves de Granada-SAS                                                                           |                            | SeqCOVID-SPAIN consortium/IBV(CSIC)                                                                                                        | Irene Pedrosa Corral; José M. Navarro-Marí and SeqCOVID-SPAIN consortium; Sara Sanbonmatsu Gámez                                                                                                                                                                                                                                                                                                                                                                                                                                                                                                                                                                                                                                                                                                                                                                                      |
| EPI_ISL_862658, EPI_ISL_913020                                                                                                                                                                                                                                                                                                                                                                                                                                                                                                                                                                                                                                                                                                                                                                                                                                                                                                                                                                                                                                                                                                                                                                                                             | Hospital Universitario de Ceuta                                                                                                      |                            | Instituto de Salud Carlos III                                                                                                              | A. Monzón; F. Casas; I. Hijano, S.; I. Jiménez; I. López, J.; Iglesias-Caballero; M. Camarero; M. Cuesta; M. González-Esguevillas; M. Pozo; M. Zaballos; P. Jiménez; P. Zaballos; S. Cuesta; S. Juliá; S. Molinero Calamita; S. Pozo; S. Sandoñs; S. Varona; V. Vázquez                                                                                                                                                                                                                                                                                                                                                                                                                                                                                                                                                                                                               |
| EPI_ISL_7536135                                                                                                                                                                                                                                                                                                                                                                                                                                                                                                                                                                                                                                                                                                                                                                                                                                                                                                                                                                                                                                                                                                                                                                                                                            | Hospital Virgen de la Luz                                                                                                            |                            | Hospital General Universitario Albacete                                                                                                    | Caridad Sainz de Baranda Camino; Lorena Robles-Fonseca                                                                                                                                                                                                                                                                                                                                                                                                                                                                                                                                                                                                                                                                                                                                                                                                                                |
| EPI_ISL_1671553                                                                                                                                                                                                                                                                                                                                                                                                                                                                                                                                                                                                                                                                                                                                                                                                                                                                                                                                                                                                                                                                                                                                                                                                                            | Hospital de la Santa Creu i Sant Pau. Servicio de Microbiología                                                                      |                            | SeqCOVID-SPAIN consortium/IBV(CSIC)                                                                                                        | Elisenda Miró and SeqCOVID-SPAIN consortium; Ferran Navarro; Núria Rabella                                                                                                                                                                                                                                                                                                                                                                                                                                                                                                                                                                                                                                                                                                                                                                                                            |
| EPI_ISL_1579218, EPI_ISL_4080050                                                                                                                                                                                                                                                                                                                                                                                                                                                                                                                                                                                                                                                                                                                                                                                                                                                                                                                                                                                                                                                                                                                                                                                                           | Hospital of Southern Norway - Kristiansand, Department of Medical Microbiology                                                       |                            | Norwegian Institute of Public Health, Department of Virology                                                                               | Atya R Ali; Debech Nadia; Engebretsen Serina Beate; Garcia Lorente Ignacio; Hilde Elshaug; Hilde Vollan; Jon Bråte; Kamilla Heddeland Instefjord; Karoline Bragstad; Kathrine Stene-Johansen; Line Victoria Moen; Marie Paulsen Madsen; Olav Hungnes; Pedersen Benedikte Nevjen; Rasmus Riis Kopperud                                                                                                                                                                                                                                                                                                                                                                                                                                                                                                                                                                                 |
| EPI_ISL_4498522, EPI_ISL_6855539, EPI_ISL_8624402                                                                                                                                                                                                                                                                                                                                                                                                                                                                                                                                                                                                                                                                                                                                                                                                                                                                                                                                                                                                                                                                                                                                                                                          | Hospital of the University of Pennsylvania Molecular Pathology Lab                                                                   |                            | Bushman                                                                                                                                    | Andrew D. Marques; Aoife M. Roche; Arupa Ganguly; Ayannah S. Fitzgerald; Brendan Kelly; Jevon Graham-Wooten; John K. Everett; Kyle Rodino; Layla A. Khatib; Mike Feldman; Ronald G. Collman and Frederic Bushan; Ronald G. Collman and Frederic Bushman; Samantha A. Whiteside; Scott Sherrill-Mix; Shantan Reddy; Young Hwang                                                                                                                                                                                                                                                                                                                                                                                                                                                                                                                                                        |
| EPI_ISL_3022379                                                                                                                                                                                                                                                                                                                                                                                                                                                                                                                                                                                                                                                                                                                                                                                                                                                                                                                                                                                                                                                                                                                                                                                                                            | Hospital of the University of Pennsylvania Molecular Pathology Lab                                                                   |                            | Bushman Lab - University of Pennsylvania                                                                                                   | Aoife M. Roche; Arupa Ganguly; Ayannah S. Fitzgerald; Brendan Kelly; Jevon Graham-Wooten; John K. Everett; Kyle Rodino; Layla A. Khatib; Mike Feldman; Ronald G. Collman and Frederic Bushan; Samantha A. Whiteside; Scott Sherrill-Mix; Shantan Reddy; Young Hwang                                                                                                                                                                                                                                                                                                                                                                                                                                                                                                                                                                                                                   |
| EPI_ISL_2968672                                                                                                                                                                                                                                                                                                                                                                                                                                                                                                                                                                                                                                                                                                                                                                                                                                                                                                                                                                                                                                                                                                                                                                                                                            | Houston Health Dept.                                                                                                                 |                            | Houston Health Dept.                                                                                                                       | Adolpho Lara; Pamela Brown; Ryker Penn; Yanlai Lai                                                                                                                                                                                                                                                                                                                                                                                                                                                                                                                                                                                                                                                                                                                                                                                                                                    |
| EPI_ISL_543145, EPI_ISL_543748, EPI_ISL_544702, EPI_ISL_780230, EPI_ISL_780691, EPI_ISL_784727, EPI_ISL_784943, EPI_ISL_785312, EPI_ISL_786141, EPI_ISL_786177, EPI_ISL_786334, EPI_ISL_1075476, EPI_ISL_1075639, EPI_ISL_1075704, EPI_ISL_1076061, EPI_ISL_1076575, EPI_ISL_1076915, EPI_ISL_1077262, EPI_ISL_1079112, EPI_ISL_1079131, EPI_ISL_1080167, EPI_ISL_1202646, EPI_ISL_1237024, EPI_ISL_1238182, EPI_ISL_1303800, EPI_ISL_1304657, EPI_ISL_1305314, EPI_ISL_1305525, EPI_ISL_2190771, EPI_ISL_2190771, EPI_ISL_2191006, EPI_ISL_2191680, EPI_ISL_2202705, EPI_ISL_2223022, EPI_ISL_2223286, EPI_ISL_5073379, EPI_ISL_5074580, EPI_ISL_5074955, EPI_ISL_5085349, EPI_ISL_5337759, EPI_ISL_5339286, EPI_ISL_5341099, EPI_ISL_5341153, EPI_ISL_5341798, EPI_ISL_5341801, EPI_ISL_5341903, EPI_ISL_5342021, EPI_ISL_5343329, EPI_ISL_5344495, EPI_ISL_5344780, EPI_ISL_5345581, EPI_ISL_5368851, EPI_ISL_5372198, EPI_ISL_5374641, EPI_ISL_5379113, EPI_ISL_5380061, EPI_ISL_5383095, EPI_ISL_5383339, EPI_ISL_5383553, EPI_ISL_5383802, EPI_ISL_5383829, EPI_ISL_5383831, EPI_ISL_5384098, EPI_ISL_5384106, EPI_ISL_5388997, EPI_ISL_5389260, EPI_ISL_6948903, EPI_ISL_6948938, EPI_ISL_6989793, EPI_ISL_7603239, EPI_ISL_9197128 | see above                                                                                                                            | Houston Methodist Hospital | Houston Methodist Hospital                                                                                                                 | Akanksha Batajoo; Chia-Wei Chow; Concepcion C. Cantu; Daniel Boutz; David W. Bernard; Ghazaleh Eskandari; Heather Hendrickson; Hoang A. T. Nguyen; Hung-Che Kuo; Ilya J. Finkelstein; J. Hunter Long; James J. Davis; Jason S. McLellan; Jessica Cambric; Jimmy Gollihar; Jule Goike; Kamyab Javanmardi; Kristina Reppond; Layne Pruitt; Madison N. Shyer; Marcus Nguyen; Matthew Ojeda Saavedra; Maulik Shukla; Muthiah Kumaraswami; Paul A. Christensen; Prasanti Yerramilli; Randall J. Olsen; Rashi Thakur; Regan Mangham; Richard Snehall; Robert Olson; Ryan Gadd; S. Wesley Long; Sindy Pena; Sishir Subedi; and James M. Musser                                                                                                                                                                                                                                               |
| EPI_ISL_739228                                                                                                                                                                                                                                                                                                                                                                                                                                                                                                                                                                                                                                                                                                                                                                                                                                                                                                                                                                                                                                                                                                                                                                                                                             | Humboldt County Public Health Laboratory                                                                                             |                            | Chan-Zuckerberg Biohub                                                                                                                     | CZB Cliahub Consortium                                                                                                                                                                                                                                                                                                                                                                                                                                                                                                                                                                                                                                                                                                                                                                                                                                                                |
| EPI_ISL_3875948                                                                                                                                                                                                                                                                                                                                                                                                                                                                                                                                                                                                                                                                                                                                                                                                                                                                                                                                                                                                                                                                                                                                                                                                                            | Hyogo Prefectural Institute of Public Health science                                                                                 |                            | Pathogen Genomics Center, National Institute of Infectious Diseases                                                                        | Denshi Takai; Etsuko Saito; Kenichi Ogita; Kentaro Itokawa; Kyoko Suzuki; Makoto Kuroda; Masanori Hashino; Masatsugu Chikahira; Miki Ogi; Rina Tanaka; Tomohiro Oshibe; Tsuyoshi Sekizuka; Yumi Akiyama                                                                                                                                                                                                                                                                                                                                                                                                                                                                                                                                                                                                                                                                               |
| EPI_ISL_961626                                                                                                                                                                                                                                                                                                                                                                                                                                                                                                                                                                                                                                                                                                                                                                                                                                                                                                                                                                                                                                                                                                                                                                                                                             | Hôpital Georges L. Dumont                                                                                                            |                            | National Microbiology Laboratory (NML)                                                                                                     | Anna Majer; Anneliese Landgraaf; CanCOGen's metadata curation team; Darian Hole; Elsie Grudeski; Gary Van Domselaar; Grace Seo; Guillaume Desnoyers; Jennifer Tanner; Kirsten Biggar; Madison Chapel; Morag Graham; Natalie Knox; Nathalie Bastien; Philip Mabon; Public Health Agency of Canada CanCOGen team; Rhiannon Huzarewich; Richard Garceau; Russell Mandes; Shari Tyson; Timothy Booth; Yan Li                                                                                                                                                                                                                                                                                                                                                                                                                                                                              |
| EPI_ISL_912912                                                                                                                                                                                                                                                                                                                                                                                                                                                                                                                                                                                                                                                                                                                                                                                                                                                                                                                                                                                                                                                                                                                                                                                                                             | Hôpital Pitié-Salpêtrière                                                                                                            |                            | Department of Virology, Henri Mondor University Hospital, Assistance Publique Hôpitaux de Paris, Université Paris-Est Créteil, INSERM U955 | Alexandre Soulier; Christophe Rodriguez; Elisabeth Trawinski; Guillaume Gricourt; Jean-Michel Pawlotsky; Melissa N'Debi; Slim Fourati; Vanessa Demontant                                                                                                                                                                                                                                                                                                                                                                                                                                                                                                                                                                                                                                                                                                                              |
| EPI_ISL_653818                                                                                                                                                                                                                                                                                                                                                                                                                                                                                                                                                                                                                                                                                                                                                                                                                                                                                                                                                                                                                                                                                                                                                                                                                             | I.R.C.C.S. "S. De Bellis" - Ente Ospedaliero                                                                                         |                            | Istituto Zooprofilattico Sperimentale della Puglia e della Basilicata                                                                      | Bianco A.; Capozzi L.; Cipoletta D.; Del Sambro L.; Galante D.; Lippolis A.; Notaricola M.; Parisi A.                                                                                                                                                                                                                                                                                                                                                                                                                                                                                                                                                                                                                                                                                                                                                                                 |

|                                                                                                                                        |                                                                                                     |                                                                                                                                        |                                                                                                                                                                                                                                                                                                                                                                                                                                                                                                                                                                                                                                                                                                                                                                                                                                                                                                                                          |
|----------------------------------------------------------------------------------------------------------------------------------------|-----------------------------------------------------------------------------------------------------|----------------------------------------------------------------------------------------------------------------------------------------|------------------------------------------------------------------------------------------------------------------------------------------------------------------------------------------------------------------------------------------------------------------------------------------------------------------------------------------------------------------------------------------------------------------------------------------------------------------------------------------------------------------------------------------------------------------------------------------------------------------------------------------------------------------------------------------------------------------------------------------------------------------------------------------------------------------------------------------------------------------------------------------------------------------------------------------|
| EPI_ISL_1120830                                                                                                                        | ICH-SION                                                                                            | Laboratory of genomics and metagenomics, Institute of Microbiology, University Hospital Centre and University of Lausanne, Switzerland | Claire Bertelli; Damien Jacot; Gilbert Greub; Sébastien Aebly; Trestan Pillonel                                                                                                                                                                                                                                                                                                                                                                                                                                                                                                                                                                                                                                                                                                                                                                                                                                                          |
| EPI_ISL_1704240, EPI_ISL_1704398, EPI_ISL_1928423, EPI_ISL_2546751, EPI_ISL_2965960, EPI_ISL_9419055, EPI_ISL_9419374, EPI_ISL_9419398 | ICMR-National Institute of Virology - INSACOG                                                       | NIV Influenza                                                                                                                          | Dr. Varsha Potdar and NIC Team; NIV; Potdar; Pune; Varsha on behalf of National Influenza Centre                                                                                                                                                                                                                                                                                                                                                                                                                                                                                                                                                                                                                                                                                                                                                                                                                                         |
| see above                                                                                                                              | ID Bureau of Laboratories                                                                           | Centers for Disease Control and Prevention Division of Viral Diseases, Pathogen Discovery                                              | Alex Burgin; Ben Rambo-Martin; Clinton Paden; Dakota Howard; Dave Wentworth; Dhvani Batra; Jasmine Padilla; Joseph Madden; Justin Lee; Kristen Knipe; Kristine Lacek; Mark Burroughs; Matthew Schmerer; Meghan Bentz; Mili Sheth; Peter Cook; Sam Shepard; Sarah Nobles; Vivien Dugan; Yvette Unoarumi                                                                                                                                                                                                                                                                                                                                                                                                                                                                                                                                                                                                                                   |
| EPI_ISL_6472177                                                                                                                        | ID Bureau of Laboratories                                                                           | Genomics and Discovery, Respiratory Viruses Branch, Division of Viral Diseases, Centers for Disease Control and Prevention             | Anna Montmayeur; Anna Uehara; Clinton R. Paden; Haibin Wang; Jing Zhang; Justin Lee; Krista Queen; Mili Sheth; Peter W. Cook; Rachel Marine; Suxiang Tong; Yan Li; Ying Tao                                                                                                                                                                                                                                                                                                                                                                                                                                                                                                                                                                                                                                                                                                                                                              |
| EPI_ISL_751567                                                                                                                         | ID Bureau of Laboratories                                                                           | Genomics and Discovery, Respiratory Viruses Branch, Division of Viral Diseases, Centers for Disease Control and Prevention             | Anna Montmayeur; Anna Uehara; Clinton R. Paden; Haibin Wang; Jing Zhang; Justin Lee; Krista Queen; Mili Sheth; Peter W. Cook; Rachel Marine; Suxiang Tong; Yan Li; Ying Tao                                                                                                                                                                                                                                                                                                                                                                                                                                                                                                                                                                                                                                                                                                                                                              |
| EPI_ISL_5121234                                                                                                                        | IMD - Institut für Medizinische Diagnostik Berlin-Potsdam                                           | Robert Koch Institute                                                                                                                  |                                                                                                                                                                                                                                                                                                                                                                                                                                                                                                                                                                                                                                                                                                                                                                                                                                                                                                                                          |
| EPI_ISL_2123403                                                                                                                        | IMD - Medizinisches Labor Rostock                                                                   | Robert Koch Institute                                                                                                                  |                                                                                                                                                                                                                                                                                                                                                                                                                                                                                                                                                                                                                                                                                                                                                                                                                                                                                                                                          |
| EPI_ISL_1572090, EPI_ISL_3711923, EPI_ISL_7076240                                                                                      | IMD Labor Frankfurt                                                                                 | Robert Koch Institute                                                                                                                  |                                                                                                                                                                                                                                                                                                                                                                                                                                                                                                                                                                                                                                                                                                                                                                                                                                                                                                                                          |
| EPI_ISL_1490836, EPI_ISL_2134611, EPI_ISL_3689238                                                                                      | IN State Department of Health Laboratory Services                                                   | IN State Department of Health Laboratory Services                                                                                      | Ankita Kashikar; Brian Pope; Cassandra Campion; Jamie Yeadon; Kyle Brownlee; Lixia Liu; Mark Glazier; Melissa Hindenlang                                                                                                                                                                                                                                                                                                                                                                                                                                                                                                                                                                                                                                                                                                                                                                                                                 |
| EPI_ISL_419255                                                                                                                         | INMI Lazzaro Spallanzani IRCCS                                                                      | INMI Lazzaro Spallanzani IRCCS                                                                                                         | Antonino Di Caro; Barbara Bartolini; Cesare E. M. Gruber; Concetta Castilletti; Daniele Lapa; Eleonora Lalle; Emanuela Giombini; Fabrizio Carletti; Francesca Colavita; Francesco Messina; Giuseppe Ippolito.; Maria R. Capobianchi; Martina Rueca                                                                                                                                                                                                                                                                                                                                                                                                                                                                                                                                                                                                                                                                                       |
| EPI_ISL_2880185                                                                                                                        | INSACOG Surveillance                                                                                | INSACOG at CSIR Institute of Genomics and Integrative Biology                                                                          | INSACOG                                                                                                                                                                                                                                                                                                                                                                                                                                                                                                                                                                                                                                                                                                                                                                                                                                                                                                                                  |
| EPI_ISL_3189129                                                                                                                        | INSACOG-Assam                                                                                       | National Institute of Biomedical Genomics - INSACOG                                                                                    | Ajanta Sharma; Arindam Maitra; Kailash Chamuah; Lahari Saikia; Nidhan Kumar Biswas; Saumitra Das; Sreedhar Chinnaswamy                                                                                                                                                                                                                                                                                                                                                                                                                                                                                                                                                                                                                                                                                                                                                                                                                   |
| EPI_ISL_7212825, EPI_ISL_7215343                                                                                                       | INSACOG-IGIB and Kerala State SARS-COV-2 Genome Surveillance Programme (GENESCOV2)                  | INSACOG and GENESCOV2 at CSIR Institute of Genomics and Integrative Biology                                                            | INSACOG-IGIB and Kerala State SARS-COV-2 Genome Surveillance Programme (GENESCOV2)                                                                                                                                                                                                                                                                                                                                                                                                                                                                                                                                                                                                                                                                                                                                                                                                                                                       |
| EPI_ISL_3614421, EPI_ISL_9323591                                                                                                       | INSACOG-MANIPUR                                                                                     | National Institute of Biomedical Genomics - INSACOG                                                                                    | Arindam Maitra; Kh. Ranjana Devi; L. Shivadutta Singh; Nidhan Kumar Biswas; R.K.Manojkumar Singh; Saumitra Das; Sreedhar Chinnaswamy                                                                                                                                                                                                                                                                                                                                                                                                                                                                                                                                                                                                                                                                                                                                                                                                     |
| EPI_ISL_9056472, EPI_ISL_9389603                                                                                                       | INSACOG-Mizoram                                                                                     | National Institute of Biomedical Genomics - INSACOG                                                                                    | Arindam Maitra; Gracy Laldinmawii; N Senthil Kumar; Nidhan Kumar Biswas; Saumitra Das; Sreedhar Chinnaswamy; Swagnik Roy                                                                                                                                                                                                                                                                                                                                                                                                                                                                                                                                                                                                                                                                                                                                                                                                                 |
| EPI_ISL_4312099                                                                                                                        | INSACOG-Sikkim                                                                                      | National Institute of Biomedical Genomics - INSACOG                                                                                    | Arindam Maitra; Kaden Zangmu Bhutia; Nidhan Kumar Biswas; Saumitra Das; Shrijana Gurung; Sreedhar Chinnaswamy Tshering Ongmu Bhutia                                                                                                                                                                                                                                                                                                                                                                                                                                                                                                                                                                                                                                                                                                                                                                                                      |
| EPI_ISL_2878025, EPI_ISL_2878032                                                                                                       | INSACOG-Tripura                                                                                     | National Institute of Biomedical Genomics - INSACOG                                                                                    | Apurba Sarkar; Arindam Maitra; Nidhan Kumar Biswas; Saikat Majumder; Saumitra Das; Sreedhar Chinnaswamy; Tapan Majumdar                                                                                                                                                                                                                                                                                                                                                                                                                                                                                                                                                                                                                                                                                                                                                                                                                  |
| EPI_ISL_2400208, EPI_ISL_2548818                                                                                                       | INSACOG-WB                                                                                          | National Institute of Biomedical Genomics - INSACOG                                                                                    | Ajay Chakraborti; Arindam Maitra; Bhaswati Bandyopadhyay; Nidhan Kumar Biswas; Saumitra Das; Sreedhar Chinnaswamy; Tamal Ghosh                                                                                                                                                                                                                                                                                                                                                                                                                                                                                                                                                                                                                                                                                                                                                                                                           |
| EPI_ISL_4168199, EPI_ISL_4747467, EPI_ISL_5336134, EPI_ISL_5645943, EPI_ISL_5679326                                                    | INSIDE DIAGNOSTICOS                                                                                 | Instituto Butantan                                                                                                                     | Antonio Jorge Martins; Claudia Renata dos Santos Barros; David Schlesinger; Debora Botequijo Moretti; Dimas Tadeu Covas; Elaine Cristina Marquize; Elaine Vieira Santos; Evandra Strazza Rodrigues; Heidge Fukumasu; Jayme Augusto de Souza-Neto; José Salvatore Leister Patané; Luiz Alcantara; Luiz Lehmann Coutinho; Maria Carolina Elias; Mauricio Lacerda Nogueira; Rafael dos Santos Bezerra; Raul Machado Neto; Rejane Maria Tommasini Grotto; Ricardo Haddad; Sandra Coccuzzo Sampaio Vessoni; Simone Kashima; Svetoslav Nanev Slavov; Vincent Louis Viala                                                                                                                                                                                                                                                                                                                                                                       |
| EPI_ISL_3374363                                                                                                                        | INSIDE DIAGNÓSTICOS                                                                                 | Instituto Butantan                                                                                                                     | Antonio Jorge Martins; Claudia Renata dos Santos Barros; David Schlesinger; Debora Botequijo Moretti; Dimas Tadeu Covas; Elaine Cristina Marquize; Elaine Vieira Santos; Evandra Strazza Rodrigues; Heidge Fukumasu; Jayme Augusto de Souza-Neto; José Salvatore Leister Patané; Luiz Alcantara; Luiz Lehmann Coutinho; Maria Carolina Elias; Mauricio Lacerda Nogueira; Rafael dos Santos Bezerra; Raul Machado Neto; Rejane Maria Tommasini Grotto; Ricardo Haddad; Sandra Coccuzzo Sampaio Vessoni; Simone Kashima; Svetoslav Nanev Slavov; Vincent Louis Viala                                                                                                                                                                                                                                                                                                                                                                       |
| EPI_ISL_6507575                                                                                                                        | INSPI-CRN DE INFLUENZA Y OTROS VIRUS RESPIRATORIOS                                                  | INSPI-CRN DE INFLUENZA Y OTROS VIRUS RESPIRATORIOS                                                                                     | Alfredo Bruno; Domenica de Mora; Fernando Llerena; Jimmy Garcés; Lizbeth Patiño; Marcela Mejia; Maritza Olmedo; Michelle Páez; Ruben Armas                                                                                                                                                                                                                                                                                                                                                                                                                                                                                                                                                                                                                                                                                                                                                                                               |
| EPI_ISL_2893592, EPI_ISL_3133212, EPI_ISL_3274460, EPI_ISL_4496994, EPI_ISL_4497047                                                    | INSPI-CRN DE INFLUENZA Y OTROS VIRUS RESPIRATORIOS                                                  | NIC-INSPI                                                                                                                              | Alfredo Bruno; Alfredo Bruno; Daniel Ramos; Domenica de Mora.; Jimmy Garcés; Johanna Laines; Lizbeth Patiño; Manuel Gonzalez; Maria Angelica Becerra; Maritza Olmedo; Mayra Wilca; Michelle Páez                                                                                                                                                                                                                                                                                                                                                                                                                                                                                                                                                                                                                                                                                                                                         |
| EPI_ISL_5737403                                                                                                                        | INTERLAB                                                                                            | Omics Sciences Laboratory                                                                                                              | Darlyn Amaya; Derly Andrade Molina; Gabriel Morey León; Juan Carlos Fernández Cadena; Karen Muñoz; Katheryn Sacheri; Rodrigo Ludeña                                                                                                                                                                                                                                                                                                                                                                                                                                                                                                                                                                                                                                                                                                                                                                                                      |
| EPI_ISL_1399391                                                                                                                        | IPO Lisboa                                                                                          | Instituto Nacional de Saude (INSA) and Instituto Gulbenkian de Ciencia (IGC)                                                           | Borges et al                                                                                                                                                                                                                                                                                                                                                                                                                                                                                                                                                                                                                                                                                                                                                                                                                                                                                                                             |
| EPI_ISL_4417011                                                                                                                        | IRCCS INMI Lazzaro Spallanzani                                                                      | INMI Lazzaro Spallanzani IRCCS                                                                                                         | A Di Caro; B Bartolini; CEM Gruber; E Giombini; F Messina; F Santini; G Bonfiglio; M Rueca; MR Capobianchi; O Butera                                                                                                                                                                                                                                                                                                                                                                                                                                                                                                                                                                                                                                                                                                                                                                                                                     |
| EPI_ISL_751332                                                                                                                         | IRCCS Sacro Cuore Don Calabria Hospital, Department of Infectious, Tropical Diseases & Microbiology | University of Verona, Department of Biotechnology                                                                                      | Antonio Mori; Chiara Degli Esposti; Chiara Piubelli; Cristina Beltrami; Elena Pomari; Emanuela Cosentino; Giulia Lopatriello; Luca Marcolungo; Massimo Delledonne; Michela Deiana                                                                                                                                                                                                                                                                                                                                                                                                                                                                                                                                                                                                                                                                                                                                                        |
| EPI_ISL_2716746, EPI_ISL_3068467, EPI_ISL_3420000                                                                                      | IRCCS San Gallicano Dermatological Institute                                                        | IRCCS Regina Elena National Cancer Institute                                                                                           | Aldo Morrone; Alice Massacci; Carla Mottini; Fabrizio Ensolì; Frauke Goeman; Fulvia Pimpinelli; Gennaro Ciliberto; Giovanna D'agosto; Giovanni Blandino; Giulia Orlandi; Martina Pontone; Matteo Pallocca; Maurizio Fanciulli; Sabrina Strano; Sara Donzelli                                                                                                                                                                                                                                                                                                                                                                                                                                                                                                                                                                                                                                                                             |
| EPI_ISL_1663354                                                                                                                        | ITKI Arogyashala                                                                                    | Institute of Life Sciences - INSACOG                                                                                                   | Ajay Parida; Amol M. Kanampalliwar; Arup Ghosh; Atimukta Jha; INSACOG Consortium; Punit Prasad; Rajeeb Swain; Rupesh Dash; Safal Walla; Shifu Aggarwal; Sunil K. Raghav                                                                                                                                                                                                                                                                                                                                                                                                                                                                                                                                                                                                                                                                                                                                                                  |
| EPI_ISL_2427277, EPI_ISL_7709656                                                                                                       | IVY3 Central Lab, Vanderbilt University Medical Center                                              | Lauring Lab, University of Michigan, Department of Microbiology and Immunology                                                         | Gilbert                                                                                                                                                                                                                                                                                                                                                                                                                                                                                                                                                                                                                                                                                                                                                                                                                                                                                                                                  |
| EPI_ISL_1447760, EPI_ISL_1447783, EPI_ISL_1509514                                                                                      | IZSM                                                                                                | TIGEM                                                                                                                                  | Antonio Grimaldi Patrizia Annunziata Francesco Panariello Biancamaria Pierrri Claudia Tiberio Valentina Bouche Chiara Colantuono Maria Concetta Cuomo Denise Di Concilio Lucio Di Filippo Anna Manfredi Marcello Salvi Antonio Limone Luigi Atripaldi Pellegrino Cerino Andrea Ballabio Davide Cacchiarelli                                                                                                                                                                                                                                                                                                                                                                                                                                                                                                                                                                                                                              |
| EPI_ISL_7090332                                                                                                                        | Ibaraki Prefectural Institute of Public Health                                                      | Ibaraki Prefectural Institute of Public Health                                                                                         | Keiko Goto; Kentaro Itokawa; Makoto Kuroda; Masanori Hashino; Rina Tanaka; Ryo Kashimura; Shuichi Osawa; Tsuyoshi Sekizuka                                                                                                                                                                                                                                                                                                                                                                                                                                                                                                                                                                                                                                                                                                                                                                                                               |
| EPI_ISL_5851626, EPI_ISL_5868853, EPI_ISL_5868922, EPI_ISL_7674383                                                                     | Idaho Bureau of Laboratories                                                                        | BVAMC, RD                                                                                                                              | "R. Beukelman; Aimee Ceniseros; Christian Loera; Christopher Ball; Dennis Stevens; Dennis Stevens"; Devin Bolz; Emily Price; Eric McIndoo; Hailey Burgoyne; Jay Radke; Mary Cloud Ammons; Matthew Charles Burns; R. Beukelman; Robert L. Voermans; Sarah Hobbey                                                                                                                                                                                                                                                                                                                                                                                                                                                                                                                                                                                                                                                                          |
| EPI_ISL_3640831                                                                                                                        | Idaho Bureau of Laboratories                                                                        | Boise VA Medical Center, PALMS                                                                                                         | Aimee Ceniseros; Cheri Lamb McFarlane; Christian Loera; Dr. Christopher Ball; Emily Bartlett; James Razor; Matthew Burns; Ying Pei                                                                                                                                                                                                                                                                                                                                                                                                                                                                                                                                                                                                                                                                                                                                                                                                       |
| EPI_ISL_5057926, EPI_ISL_5115136                                                                                                       | Idaho Bureau of Laboratories                                                                        | Center for Global Health, University of New Mexico Health Sciences Center                                                              | Aimee Ceniseros; Christian Loera; Christopher Ball; Darrell Dinwiddie; Daryl Domman; Kurt Schwalm; Matthew Burns; R. Beukelman; Valerie Morley                                                                                                                                                                                                                                                                                                                                                                                                                                                                                                                                                                                                                                                                                                                                                                                           |
| EPI_ISL_3556827, EPI_ISL_6606500, EPI_ISL_7163323, EPI_ISL_7314251, EPI_ISL_7314288, EPI_ISL_8629110                                   | Idaho Bureau of Laboratories                                                                        | Idaho Bureau of Laboratories                                                                                                           | "R. Beukelman; Aimee Ceniseros; Christian Loera; Christopher Ball"; Matthew Charles Burns; Robert L. Voermans                                                                                                                                                                                                                                                                                                                                                                                                                                                                                                                                                                                                                                                                                                                                                                                                                            |
| EPI_ISL_848348, EPI_ISL_4848254                                                                                                        | Illinois Department of Public Health                                                                | Gagnon Lab, Southern Illinois University                                                                                               | Keith Gagnon                                                                                                                                                                                                                                                                                                                                                                                                                                                                                                                                                                                                                                                                                                                                                                                                                                                                                                                             |
| EPI_ISL_7660214, EPI_ISL_8435218                                                                                                       | Illinois Department of Public Health                                                                | Illinois Department of Public Health - Chicago Lab                                                                                     | Ira Heimler; Joel Price; Vineet K. Dhiman                                                                                                                                                                                                                                                                                                                                                                                                                                                                                                                                                                                                                                                                                                                                                                                                                                                                                                |
| EPI_ISL_1443241, EPI_ISL_1825694, EPI_ISL_2203506, EPI_ISL_3133484                                                                     | Illinois Department of Public Health - Springfield Lab                                              | Illinois Department of Public Health - Springfield Lab                                                                                 | Bryan Sim; Gordon McCall                                                                                                                                                                                                                                                                                                                                                                                                                                                                                                                                                                                                                                                                                                                                                                                                                                                                                                                 |
| EPI_ISL_3542760                                                                                                                        | Ilocos Training and Regional Medical Center                                                         | Philippine Genome Center                                                                                                               | Alethea R. de Guzman; Anna Ong-Lim; Arienne A. Zamora; Benedict A. Maralit; Carlo M. Lapid; Celia Carlos; Cynthia P. Saloma; Devon Ray Pacial; Diomedes A. Cariño; Edsel Maurice Salvana; El King D. Morado; Elcid Aaron R. Pangilinan; Eva Maria Cutiongco-de la Paz; Francis A. Tablizo; Henrietta Marie Rodriguez; Jaime C. Montoya; Jan Michael C. Yap; Jarvin E. Nipales; Jo-Hannah S. Lames; John O. Wong; Joshua Gregor A. Dizon; Juan Antonio R. Magalang; Karol Sophia Agape R. Padilla; Kenneth M. Kim; Kris P. Punayan; Kristina Patriz Dela Cruz; Lindsay Clare D.L. Carandang; Ma. Exanil Plantig; Marc Edsel C. Ayes; Maria Rosario Singh-Vergeire; Maria Sofia L. Yangzon; Marielle M. Gamba; Marissa Alejandria; Niña Francesca Bustamante; Razel Nikka M. Hao; Renato Jacinto Q. Mantaring; Rianna Patricia S. Cruz; Shieila Mae M. Araiza; Yvonne Valerie Austria; Zipporah Mariebelle R. Enriquez; Zyrrel V. Mollejon |
| EPI_ISL_2490279, EPI_ISL_4198879                                                                                                       | Incyte Diagnostics Spokane                                                                          | Seattle Flu Study                                                                                                                      | Amanda Adler; Barry R. Lutz; Benjamin Pelle; Brian Hiatt; Caitlin R. Wolf; Chris D. Frazier; Deborah A. Nickerson; Elisabeth Brandstetter; Erica Ryke; Geoff Melly; Helen Y. Chu; Janet A. Englund; Jay Shendure; Jover Lee; Kairsten Fay; Kirsten Lacombe; Lea M. Starita; Mark J. Rieder; Matthew Richardson; Matthew Thompson; Melissa Truong; Michael Boeckh; Michael Famulare; Misja Ilcin; Peter D. Han; Philip Dykema; Romesh Gautom; Scott Lindquist; Thomas R. Sibley; Trevor Bedford                                                                                                                                                                                                                                                                                                                                                                                                                                           |

|                                                                                                                                                                                                                                                                                                                                                                                                                                                                                                                                                                                                                                                                                                                                                                                                                                                                                                                                                                                        |                                                                                                                                                |                                                                                                                                                                                                                                                                                                                                                                                                                                                            |                                                                                                                                                                                                                                                                                                                                                                                                                                                                                                                                                                   |
|----------------------------------------------------------------------------------------------------------------------------------------------------------------------------------------------------------------------------------------------------------------------------------------------------------------------------------------------------------------------------------------------------------------------------------------------------------------------------------------------------------------------------------------------------------------------------------------------------------------------------------------------------------------------------------------------------------------------------------------------------------------------------------------------------------------------------------------------------------------------------------------------------------------------------------------------------------------------------------------|------------------------------------------------------------------------------------------------------------------------------------------------|------------------------------------------------------------------------------------------------------------------------------------------------------------------------------------------------------------------------------------------------------------------------------------------------------------------------------------------------------------------------------------------------------------------------------------------------------------|-------------------------------------------------------------------------------------------------------------------------------------------------------------------------------------------------------------------------------------------------------------------------------------------------------------------------------------------------------------------------------------------------------------------------------------------------------------------------------------------------------------------------------------------------------------------|
| EPI_ISL_3473525                                                                                                                                                                                                                                                                                                                                                                                                                                                                                                                                                                                                                                                                                                                                                                                                                                                                                                                                                                        | Indian Council of Medical Research-National Institute of Virology, Microbial Containment Complex                                               | Indian Council of Medical Research-National Institute of Virology, Microbial Containment Complex                                                                                                                                                                                                                                                                                                                                                           | Pragya Yadav                                                                                                                                                                                                                                                                                                                                                                                                                                                                                                                                                      |
| EPI_ISL_1184196, EPI_ISL_1823432, EPI_ISL_1823522, EPI_ISL_5990262                                                                                                                                                                                                                                                                                                                                                                                                                                                                                                                                                                                                                                                                                                                                                                                                                                                                                                                     | Indiana Animal Disease Diagnostic Laboratory                                                                                                   | Carpi Laboratory - Purdue University                                                                                                                                                                                                                                                                                                                                                                                                                       | Abebe A Fola; G Kenitra Hendrix; Giovanna Carpi; Ilina Ci Ciobotariu; Jack Dorman; Jobin J Kattoor; Lev Gorenstein; Nicole M Perry; Rebecca P Wilkes                                                                                                                                                                                                                                                                                                                                                                                                              |
| EPI_ISL_962572, EPI_ISL_962873                                                                                                                                                                                                                                                                                                                                                                                                                                                                                                                                                                                                                                                                                                                                                                                                                                                                                                                                                         | Infectious Disease Control and Prevention Institute                                                                                            | Infectious Disease Control and Prevention Institute                                                                                                                                                                                                                                                                                                                                                                                                        | Bo Pang; Jianxing Wang; Julong Wu; Mingxiao Yao; Ti Liu; Xiaolin Jiang; Yan Li; Yujie He; Yuwei Zhang; Zengqiang Kou                                                                                                                                                                                                                                                                                                                                                                                                                                              |
| EPI_ISL_2660362                                                                                                                                                                                                                                                                                                                                                                                                                                                                                                                                                                                                                                                                                                                                                                                                                                                                                                                                                                        | Infectious Disease Program, Broad Institute of Harvard and MIT                                                                                 | Infectious Disease Program, Broad Institute of Harvard and MIT                                                                                                                                                                                                                                                                                                                                                                                             | A.E.; Adams, G.; Anahtar, M.; B.L.; B.W.; Bauer, M.; Birren; Branda, J.; Carter, A.; Cerrato, F.; Chaluvadi, S.; Chapman; Cusick, C.; D.J.; DeRuff, K.; Flowers, K.; Gallagher, G.; Gladden-Young, A.; Gnrkke, A.; Harris, J.; J.E.; K.J.; LaRocque, R.; Lagerborg, K.; Lemieux; Lin; Loreth, C.; MacInnis; Neumann, A.; Normandin, E.; P.C.; Park; Pierce, V.; Reilly, S.; Rosenberg, E.; Rudy, M.; Ryan, E.; S.B.; Sabeti; Shaw, B.; Siddle; Slater, D.; Smole, S.; Tomkins-Tinch, C.; Turbett, S.                                                              |
| EPI_ISL_884411                                                                                                                                                                                                                                                                                                                                                                                                                                                                                                                                                                                                                                                                                                                                                                                                                                                                                                                                                                         | Infectious Diseases, Quest Diagnostics                                                                                                         | Infectious Diseases, Quest Diagnostics                                                                                                                                                                                                                                                                                                                                                                                                                     | Anderson, B.; Bernstein, D.F.; Gerasimova, A.; Hua, M.; K.E.; Kagan; L.E.; Lacbawan, F.; Liu, Y.; Livingston; Owen, R.; R.M.; Rosenthal, S.H.; Shalhout                                                                                                                                                                                                                                                                                                                                                                                                           |
| EPI_ISL_2652174                                                                                                                                                                                                                                                                                                                                                                                                                                                                                                                                                                                                                                                                                                                                                                                                                                                                                                                                                                        | Infectious diseases Clinical Hospital, Cluj Napoca                                                                                             | Cantacuzino Institute Virology                                                                                                                                                                                                                                                                                                                                                                                                                             | Carmen Cherciu; Luiza Ustean; Mihaela Lazar; Mihaela Oprea; Nicoleta Paraschiv; Sorin Dinu                                                                                                                                                                                                                                                                                                                                                                                                                                                                        |
| EPI_ISL_1588164, EPI_ISL_1691601, EPI_ISL_1694502, EPI_ISL_1732816, EPI_ISL_1795501, EPI_ISL_1802997, EPI_ISL_1803221, EPI_ISL_2087462, EPI_ISL_2087521, EPI_ISL_2088606, EPI_ISL_2088743, EPI_ISL_2282724, EPI_ISL_2786652, EPI_ISL_3353391, EPI_ISL_3720768, EPI_ISL_4139826, EPI_ISL_4245786, EPI_ISL_4245985, EPI_ISL_4344104, EPI_ISL_4385921, EPI_ISL_4389490, EPI_ISL_4808291, EPI_ISL_4821695, EPI_ISL_4823182, EPI_ISL_5101191, EPI_ISL_5380132, EPI_ISL_5559615, EPI_ISL_5560949, EPI_ISL_5599699, EPI_ISL_5959738, EPI_ISL_6092762, EPI_ISL_6400929, EPI_ISL_6784423, EPI_ISL_7418754, EPI_ISL_7418909, EPI_ISL_7443614, EPI_ISL_7444746, EPI_ISL_7444848, EPI_ISL_7699691, EPI_ISL_7949213, EPI_ISL_8204579, EPI_ISL_8389412, EPI_ISL_8389680, EPI_ISL_8390024, EPI_ISL_8556208                                                                                                                                                                                            | Centers for Disease Control and Prevention Division of Viral Diseases, Pathogen Discovery                                                      | Adrian Paskey; Benjamin Rambo-Martin; Chirayau Goswami; Christian Bixby; Christopher Gulvick; Clinton Paden; Clinton R. Paden; Dakota Howard; Darlene Wagner; Dhvani Batra; Duncan MacCannell; Eriša Sula; Jason Caravas; Jonathan Schultz; Kara Moser; Kristine Lacey; Matthew Schmerer; Peter Cook; Peter W. Cook; Robin Grimwood; Russ Hager; Scott Sammons; Shatavisa Morrison; Tymeckia Kendall; Victoria Caban Figueroa; Yihe Wang; Yvette Unoarumhi |                                                                                                                                                                                                                                                                                                                                                                                                                                                                                                                                                                   |
| see above                                                                                                                                                                                                                                                                                                                                                                                                                                                                                                                                                                                                                                                                                                                                                                                                                                                                                                                                                                              | Infinity Biologix                                                                                                                              | Centers for Disease Control and Prevention Division of Viral Diseases, Pathogen Discovery                                                                                                                                                                                                                                                                                                                                                                  | Adrian Paskey; Benjamin Rambo-Martin; Chirayau Goswami; Christian Bixby; Christopher Gulvick; Clinton Paden; Clinton R. Paden; Dakota Howard; Darlene Wagner; Dhvani Batra; Duncan MacCannell; Eriša Sula; Jason Caravas; Jonathan Schultz; Kara Moser; Kristine Lacey; Matthew Schmerer; Peter Cook; Peter W. Cook; Robin Grimwood; Russ Hager; Scott Sammons; Shatavisa Morrison; Tymeckia Kendall; Victoria Caban Figueroa; Yihe Wang; Yvette Unoarumhi                                                                                                        |
| EPI_ISL_1251412, EPI_ISL_1819822, EPI_ISL_1820340, EPI_ISL_2425960, EPI_ISL_3834480                                                                                                                                                                                                                                                                                                                                                                                                                                                                                                                                                                                                                                                                                                                                                                                                                                                                                                    | Innlandet Hospital Trust, Division Lillehammer, Department for Medical Microbiology                                                            | Norwegian Institute of Public Health, Department of Virology                                                                                                                                                                                                                                                                                                                                                                                               | Atiya R Ali; Debecch Nadia; Engebretsen Serina Beate; Garcia Llorente Ignacio; Hilde Elshaug; Hilde Vollan; Jon Bråte; Kamilla Heddeland Instefjord; Karoline Bragstad; Kathrine Stene-Johansen; Line Victoria Moen; Marie Paulsen Madsen; Olav Hungnes; Pedersen Benedikte Nevjen; Rasmus Riis Kopperud                                                                                                                                                                                                                                                          |
| EPI_ISL_1712500                                                                                                                                                                                                                                                                                                                                                                                                                                                                                                                                                                                                                                                                                                                                                                                                                                                                                                                                                                        | Innovative Genomics Institute, UC Berkeley                                                                                                     | Innovative Genomics Institute, UC Berkeley                                                                                                                                                                                                                                                                                                                                                                                                                 | Holly Gildea; John Boyle; Phil Frankino; Stacia Wyman                                                                                                                                                                                                                                                                                                                                                                                                                                                                                                             |
| EPI_ISL_5782600                                                                                                                                                                                                                                                                                                                                                                                                                                                                                                                                                                                                                                                                                                                                                                                                                                                                                                                                                                        | Inside Diagnostics                                                                                                                             | Instituto Butantan                                                                                                                                                                                                                                                                                                                                                                                                                                         | Antonio Jorge Martins; Claudia Renata dos Santos Barros; David Schlesinger; Debora Botequiu Moretti; Dimas Tadeu Covas; Elaine Cristina Marquese; Elaine Vieira Santos; Evandra Strazza Rodrigues; Heidge Fukumasu; Jayme Augusto de Souza-Neto; José Salvatore Leister Patané; Luiz Alcantara; Luiz Lehmann Coutinho; Maria Carolina Elias; Maurício Lacerda Nogueira; Rafael dos Santos Bezerra; Raul Machado Neto; Rejane Maria Tommasini Grotto; Ricardo Haddad; Sandra Coccuzzo Sampaio Vessoni; Simone Kashima; Svetoslav Nanev Slavov; Vincent Louis Viala |
| EPI_ISL_2691162                                                                                                                                                                                                                                                                                                                                                                                                                                                                                                                                                                                                                                                                                                                                                                                                                                                                                                                                                                        | Instituto Adolfo Lutz Central                                                                                                                  | Instituto Adolfo Lutz, Interdisciplinary Procedures Center, Strategic Laboratory                                                                                                                                                                                                                                                                                                                                                                           | Caio Vinicius Dias Lopes; Claudia Regina Gonçalves; Claudio Tavares Sacchi; Erica Valessa Ramos Gomes; Karoline Rodrigues Campos; Leonardo Jose Tadeu de Araujo                                                                                                                                                                                                                                                                                                                                                                                                   |
| EPI_ISL_3914946, EPI_ISL_3915121                                                                                                                                                                                                                                                                                                                                                                                                                                                                                                                                                                                                                                                                                                                                                                                                                                                                                                                                                       | Institut National D'hygiene, Lome, Togo                                                                                                        | Noguchi Memorial Institute for Medical Research, University of Ghana, Legon, Ghana                                                                                                                                                                                                                                                                                                                                                                         | Afiwa W. Halatoko; Ameyo Dorkenoo; Anoumou Dagnan; Djimabi Salah; Hamadi Assane; Hilda Opoku Frempong; Issaka Maman; Joseph H.K. Bonney; Joyce Appiah-Kubi; Keren O. Attiku; Komlan Kossi; Lallepak Lamboni; Mounero Salou; Peace O. Uche; Quaneeta Mohkhtar; Sena Awunyo; Seyram A. Agbenyo; Yao Laylo; Yawo A. Sadjji; Zoukaneirli Issa; and Bright Adu                                                                                                                                                                                                         |
| EPI_ISL_3710397                                                                                                                                                                                                                                                                                                                                                                                                                                                                                                                                                                                                                                                                                                                                                                                                                                                                                                                                                                        | Institute for Infectious Diseases                                                                                                              | Institute for Infectious Diseases                                                                                                                                                                                                                                                                                                                                                                                                                          | Alban Ramette; Christian Baumann; Cora Sägesser; Franziska Suter-Riniker; Loic Borcard; Miguel A Terrazos Mirani; Nicole Liechti; Pascal Bittel; Peter Keller; Sonja Gempeler; Stefan Neuschwander; Stephen L. Achim                                                                                                                                                                                                                                                                                                                                              |
| EPI_ISL_1034854                                                                                                                                                                                                                                                                                                                                                                                                                                                                                                                                                                                                                                                                                                                                                                                                                                                                                                                                                                        | Institute of Medical Microbiology and Hospital Hygiene                                                                                         | Institute of Medical Microbiology and Hospital Hygiene                                                                                                                                                                                                                                                                                                                                                                                                     | Aljoscha Tersteegen; Prof. Dr. Lechim Kaasch                                                                                                                                                                                                                                                                                                                                                                                                                                                                                                                      |
| EPI_ISL_1250714, EPI_ISL_1988880, EPI_ISL_1989101, EPI_ISL_2322044, EPI_ISL_2492091, EPI_ISL_2887338, EPI_ISL_3039159, EPI_ISL_4270718, EPI_ISL_4270868, EPI_ISL_4271040, EPI_ISL_4923909, EPI_ISL_4924040, EPI_ISL_5061801, EPI_ISL_5062780, EPI_ISL_5160138, EPI_ISL_5160344, EPI_ISL_5212227, EPI_ISL_5212539, EPI_ISL_5329953, EPI_ISL_5330038, EPI_ISL_5333356, EPI_ISL_5333494, EPI_ISL_6249565, EPI_ISL_6249986, EPI_ISL_7592887, EPI_ISL_7965563, EPI_ISL_7966368, EPI_ISL_8099965, EPI_ISL_9482745, EPI_ISL_9514145                                                                                                                                                                                                                                                                                                                                                                                                                                                           | Institute of Microbiology and Immunology, Faculty of Medicine, University of Ljubljana                                                         | Institute of Microbiology and Immunology, Faculty of Medicine, University of Ljubljana                                                                                                                                                                                                                                                                                                                                                                     | Alen Suljić; Andraž Celar; Andrej Celar; Domen Lazar; Dominika Šturm; Doroteja Vljaj; Mario Poljak; Matic Brvar; Miša Korva; Patricija Pozvek; Samo Zakotnik; Tatjana Avšič – Županc; Tina Gabrovšek; Tina Živič; Tomaž Mark Zorec; Špela Pleh                                                                                                                                                                                                                                                                                                                    |
| EPI_ISL_8058843, EPI_ISL_808508                                                                                                                                                                                                                                                                                                                                                                                                                                                                                                                                                                                                                                                                                                                                                                                                                                                                                                                                                        | Institute of Molecular and Translational Medicine / Laboratory of Experimental Medicine, Faculty of Medicine and Dentistry, Palacky University | Institute of Molecular and Translational Medicine / Laboratory of Experimental Medicine, Faculty of Medicine and Dentistry, Palacky University                                                                                                                                                                                                                                                                                                             | Barbora Blumová; Hana Jaworek; Kateřina Kubaňová; Marián Hajdúch; Rastislav Slavkovský; Vladimíra Koudeľáková                                                                                                                                                                                                                                                                                                                                                                                                                                                     |
| EPI_ISL_2658796                                                                                                                                                                                                                                                                                                                                                                                                                                                                                                                                                                                                                                                                                                                                                                                                                                                                                                                                                                        | Institute of Public Health Medimurje County                                                                                                    | Croatian Institute of Public Health                                                                                                                                                                                                                                                                                                                                                                                                                        | Irena Tabain; Ivana Ferenčak                                                                                                                                                                                                                                                                                                                                                                                                                                                                                                                                      |
| EPI_ISL_2311777                                                                                                                                                                                                                                                                                                                                                                                                                                                                                                                                                                                                                                                                                                                                                                                                                                                                                                                                                                        | Institute of Public Health Lika-Senj County                                                                                                    | Croatian Institute of Public Health                                                                                                                                                                                                                                                                                                                                                                                                                        | Irena Tabain; Ivana Ferenčak                                                                                                                                                                                                                                                                                                                                                                                                                                                                                                                                      |
| EPI_ISL_2406540                                                                                                                                                                                                                                                                                                                                                                                                                                                                                                                                                                                                                                                                                                                                                                                                                                                                                                                                                                        | Institute of Public Health Split-Dalmatia County                                                                                               | Croatian Institute of Public Health                                                                                                                                                                                                                                                                                                                                                                                                                        | Irena Tabain; Ivana Ferenčak                                                                                                                                                                                                                                                                                                                                                                                                                                                                                                                                      |
| EPI_ISL_1499556                                                                                                                                                                                                                                                                                                                                                                                                                                                                                                                                                                                                                                                                                                                                                                                                                                                                                                                                                                        | Institute of Public Health of Koprivnica-Križevci County                                                                                       | Croatian Institute of Public Health                                                                                                                                                                                                                                                                                                                                                                                                                        | Irena Tabain; Ivana Ferenčak                                                                                                                                                                                                                                                                                                                                                                                                                                                                                                                                      |
| EPI_ISL_6278902, EPI_ISL_7849394, EPI_ISL_8264166, EPI_ISL_8391582                                                                                                                                                                                                                                                                                                                                                                                                                                                                                                                                                                                                                                                                                                                                                                                                                                                                                                                     | Institute of Virology, Biomedical Research Center of the Slovak Academy of Sciences, Bratislava                                                | Faculty of Mathematics, Physics and Informatics, Comenius University, Bratislava                                                                                                                                                                                                                                                                                                                                                                           | Boris Klempa; Brona Brejova; Jozef Nosek; Juraj Kopacek; Kristina Borsova; Lubomira Lukacikova; Martina Licikova; Martina Nebohacova; Monika Slavikova; Sabina Fumacova Havlikova; Tomas Vinar; Veronika Vanova; Viktoria Cabanova                                                                                                                                                                                                                                                                                                                                |
| EPI_ISL_831673, EPI_ISL_1234415, EPI_ISL_1797858                                                                                                                                                                                                                                                                                                                                                                                                                                                                                                                                                                                                                                                                                                                                                                                                                                                                                                                                       | Institute of Virology, Biomedical Research Center of the Slovak Academy of Sciences, Bratislava                                                | Faculty of Natural Sciences, Comenius University, Bratislava                                                                                                                                                                                                                                                                                                                                                                                               | Boris Klempa; Brona Brejova; Broňa Brejová; Jozef Nosek; Juraj Kopacek; Juraj Kopáček; Kristina Borsova; Kristína Boršová; Lubomira Lukacikova; Martina Licikova; Martina Ličková; Martina Nebohacova; Martina Neboháčová; Monika Slavikova; Monika Sláviková; Sabina Fumacova Havlikova; Sabina Fumáčová Havlíková; Tomas Vinar; Tomáš Vinař; Viktoria Cabanova; Viktoria Hodorova; Viktória Hodorová; Viktória Čabanová; Lubomira Lukáčiková                                                                                                                    |
| EPI_ISL_1195309, EPI_ISL_1318878, EPI_ISL_2535414, EPI_ISL_3039474, EPI_ISL_7493730                                                                                                                                                                                                                                                                                                                                                                                                                                                                                                                                                                                                                                                                                                                                                                                                                                                                                                    | Institute of Virology, Medical Center, University of Freiburg, Freiburg, Germany                                                               | Institute of Virology, Clinical Virus Genomics, Medical Center, University of Freiburg, Freiburg, Germany                                                                                                                                                                                                                                                                                                                                                  | Hajo Grundmann; Jonas Fuchs; Lena Jaki; Lisa Gutbrod; Lisa Kern; Marcus Panning; Sandra Reuter                                                                                                                                                                                                                                                                                                                                                                                                                                                                    |
| EPI_ISL_861626                                                                                                                                                                                                                                                                                                                                                                                                                                                                                                                                                                                                                                                                                                                                                                                                                                                                                                                                                                         | Instituto Adolfo Lutz - Central                                                                                                                | Instituto Adolfo Lutz, Interdisciplinary Procedures Center, Strategic Laboratory                                                                                                                                                                                                                                                                                                                                                                           | Claudia Regina Gonçalves; Claudio Tavares Sacchi; Erica Valessa Ramos Gomes; Karoline Rodrigues Campos                                                                                                                                                                                                                                                                                                                                                                                                                                                            |
| EPI_ISL_5924188                                                                                                                                                                                                                                                                                                                                                                                                                                                                                                                                                                                                                                                                                                                                                                                                                                                                                                                                                                        | Instituto Adolfo Lutz - Regional de Santos                                                                                                     | Instituto Adolfo Lutz, Interdisciplinary Procedures Center, Strategic Laboratory                                                                                                                                                                                                                                                                                                                                                                           | Caio Vinicius Dias Lopes; Claudia Regina Gonçalves; Claudio Tavares Sacchi; Karoline Rodrigues Campos; Leonardo Tadeu de Araujo; Marlon Benedito Nascimento Santos                                                                                                                                                                                                                                                                                                                                                                                                |
| EPI_ISL_6840821                                                                                                                                                                                                                                                                                                                                                                                                                                                                                                                                                                                                                                                                                                                                                                                                                                                                                                                                                                        | Instituto Adolfo Lutz - Regional de Sorocaba                                                                                                   | Instituto Adolfo Lutz, Interdisciplinary Procedures Center, Strategic Laboratory                                                                                                                                                                                                                                                                                                                                                                           | Ariadne Ferreira Amaranete; Caio Vinicius Dias Lopes; Claudia Regina Gonçalves; Claudio Tavares Sacchi; Karoline Rodrigues Campos; Marlon Benedito Nascimento Santos                                                                                                                                                                                                                                                                                                                                                                                              |
| EPI_ISL_4104689                                                                                                                                                                                                                                                                                                                                                                                                                                                                                                                                                                                                                                                                                                                                                                                                                                                                                                                                                                        | Instituto Butantan                                                                                                                             | Instituto Butantan                                                                                                                                                                                                                                                                                                                                                                                                                                         | Antonio Jorge Martins; Claudia Renata dos Santos Barros; David Schlesinger; Debora Botequiu Moretti; Dimas Tadeu Covas; Elaine Cristina Marquese; Elaine Vieira Santos; Evandra Strazza Rodrigues; Heidge Fukumasu; Jayme Augusto de Souza-Neto; José Salvatore Leister Patané; Luiz Alcantara; Luiz Lehmann Coutinho; Maria Carolina Elias; Maurício Lacerda Nogueira; Rafael dos Santos Bezerra; Raul Machado Neto; Rejane Maria Tommasini Grotto; Ricardo Haddad; Sandra Coccuzzo Sampaio Vessoni; Simone Kashima; Svetoslav Nanev Slavov; Vincent Louis Viala |
| EPI_ISL_4575075                                                                                                                                                                                                                                                                                                                                                                                                                                                                                                                                                                                                                                                                                                                                                                                                                                                                                                                                                                        | Instituto Nacional de Investigação em Saúde                                                                                                    | CERI, Centre for Epidemic Response and Innovation, Stellenbosch University and KRISP, KZN Research Innovation and Sequencing Platform, UKZN.                                                                                                                                                                                                                                                                                                               | Afonso P; David K; Emmanuel SJ; Freitas RH; Giandhari J; Inglês L; Lutucuta S; Miranda J; Morais J; Mufinda M; Naidoo Y; Neto Z; Paulo A Carralero RR Paixão JP; Pereira A; Pillay S; Tegally H; Wilkinson E; de Oliveira T                                                                                                                                                                                                                                                                                                                                       |
| EPI_ISL_2494879                                                                                                                                                                                                                                                                                                                                                                                                                                                                                                                                                                                                                                                                                                                                                                                                                                                                                                                                                                        | Instituto Nacional de Investigação em Saúde                                                                                                    | KRISP, KZN Research Innovation and Sequencing Platform                                                                                                                                                                                                                                                                                                                                                                                                     | Afonso P; David K; Emmanuel SJ; Freitas RH; Giandhari J; Inglês L; Lutucuta S; Miranda J; Morais J; Mufinda M; Naidoo Y; Neto Z; Paulo A Carralero RR Paixão JP; Pereira A; Pillay S; Tegally H; Wilkinson E; de Oliveira T                                                                                                                                                                                                                                                                                                                                       |
| EPI_ISL_4219895                                                                                                                                                                                                                                                                                                                                                                                                                                                                                                                                                                                                                                                                                                                                                                                                                                                                                                                                                                        | Instituto Nacional de Medicina Genomica                                                                                                        | Instituto Nacional de Medicina Genomica                                                                                                                                                                                                                                                                                                                                                                                                                    | Cedro-Tanda A; Escobar-Arrazola MA; Herrera-Montalvo LA.; Hidalgo-Miranda A; Mendoza-Vargas A; Ramirez-Vega O; Rangel-DeLeon D; Reyes-Grajeda JY; Yair Alfaro-Mora                                                                                                                                                                                                                                                                                                                                                                                                |
| EPI_ISL_3118878, EPI_ISL_3824309                                                                                                                                                                                                                                                                                                                                                                                                                                                                                                                                                                                                                                                                                                                                                                                                                                                                                                                                                       | Instituto de Biotecnologia - UNESP-Botucatu-SP                                                                                                 | Instituto de Biotecnologia - UNESP-Botucatu-SP                                                                                                                                                                                                                                                                                                                                                                                                             | Cecilia Artico Banho; Cíntia Bittar; Fábio Sossai Possebon; Guilherme Campos; Helena Lage Ferreira; Jorge A. Petrolí Marchesi; João Pessoa Araújo Jr.; Leila Sabrina Ullmann; Jaísa Sacchetto; Maise C. Pereira Parra; Marília Moraes; Maurício L. Nogueira; Paula Rahal; Paulo Inacio da Costa                                                                                                                                                                                                                                                                   |
| EPI_ISL_1168455, EPI_ISL_1168473                                                                                                                                                                                                                                                                                                                                                                                                                                                                                                                                                                                                                                                                                                                                                                                                                                                                                                                                                       | Instituto de Diagnostico y Referencia Epidemiologicos INDRÉ_RNLSP                                                                              | Instituto de Diagnostico y Referencia Epidemiologicos (INDRE)                                                                                                                                                                                                                                                                                                                                                                                              | Abril Rodriguez-Maldonado; Ariadna Medina-Benitez; Claudia Wong-Arambula; David Frago-so-Fonseca; Ernesto Ramirez-Gonzalez.; Gisela Barrera-Badillo; Irma Lopez-Martinez; Joaquin Quiroz-Mercado; Lucia Hernandez-Rivas; Natividad Cruz-Ortiz; Sergio Rangel-Guerrero; Tatiana Nunez-Garcia; Vanessa Rivero-Arredondo                                                                                                                                                                                                                                             |
| EPI_ISL_5822612                                                                                                                                                                                                                                                                                                                                                                                                                                                                                                                                                                                                                                                                                                                                                                                                                                                                                                                                                                        | Instituto Nacional de Saude, Mozambique                                                                                                        | Forschungszentrum Borstel                                                                                                                                                                                                                                                                                                                                                                                                                                  | Carla Madeira; Christian Utpate; Ivan Barilar; Jasmin Scharnberg; Nalia Ismael; Nuro Abilio; Sofia Viegas; Stefan Niemann; Tanja Niemann; Vanessa Mohr                                                                                                                                                                                                                                                                                                                                                                                                            |
| EPI_ISL_3969224, EPI_ISL_3971607, EPI_ISL_3971928, EPI_ISL_3972112, EPI_ISL_3972339, EPI_ISL_3973383, EPI_ISL_3973829, EPI_ISL_3975533, EPI_ISL_3976756, EPI_ISL_3977834, EPI_ISL_3978102, EPI_ISL_3978424, EPI_ISL_3978929, EPI_ISL_3978970, EPI_ISL_4048757, EPI_ISL_4048955, EPI_ISL_4100413, EPI_ISL_4290735, EPI_ISL_4291047, EPI_ISL_4327378, EPI_ISL_4327488, EPI_ISL_4353238, EPI_ISL_4407110, EPI_ISL_4499468, EPI_ISL_4522488, EPI_ISL_4522946, EPI_ISL_4596423, EPI_ISL_4597398, EPI_ISL_4621885, EPI_ISL_4674005, EPI_ISL_4679377, EPI_ISL_4679556, EPI_ISL_4734268, EPI_ISL_4851139, EPI_ISL_4860969, EPI_ISL_4863026, EPI_ISL_5012684, EPI_ISL_5012749, EPI_ISL_5027389, EPI_ISL_5027460, EPI_ISL_5028315, EPI_ISL_5124216, EPI_ISL_5178339, EPI_ISL_5184857, EPI_ISL_5242568, EPI_ISL_5244926, EPI_ISL_5245081, EPI_ISL_5615451, EPI_ISL_5786789, EPI_ISL_5786823, EPI_ISL_5995308, EPI_ISL_6109874, EPI_ISL_7181252, EPI_ISL_7183890, EPI_ISL_7185201, EPI_ISL_7761909 | Wellcome Sanger Institute for the COVID-19 Genomics UK (COG-UK) Consortium                                                                     | Cordelia Langford; David K. Jackson; Dominic Kwiatkowski; Ewan Harrison; Ian Johnston; Integrated Covid Hub North East and Alex Alderton; Jeffrey Barrett; John Sillitoe on behalf of the Wellcome Sanger Institute COVID-19 Surveillance Team; Roberto Amato; Sonia Goncalves                                                                                                                                                                             |                                                                                                                                                                                                                                                                                                                                                                                                                                                                                                                                                                   |
| see above                                                                                                                                                                                                                                                                                                                                                                                                                                                                                                                                                                                                                                                                                                                                                                                                                                                                                                                                                                              | Integrated Covid Hub North East                                                                                                                | Wellcome Sanger Institute for the COVID-19 Genomics UK (COG-UK) Consortium                                                                                                                                                                                                                                                                                                                                                                                 | Cordelia Langford; David K. Jackson; Dominic Kwiatkowski; Ewan Harrison; Ian Johnston; Integrated Covid Hub North East and Alex Alderton; Jeffrey Barrett; John Sillitoe on behalf of the Wellcome Sanger Institute COVID-19 Surveillance Team; Roberto Amato; Sonia Goncalves                                                                                                                                                                                                                                                                                    |
| EPI_ISL_7571210                                                                                                                                                                                                                                                                                                                                                                                                                                                                                                                                                                                                                                                                                                                                                                                                                                                                                                                                                                        | International Centre for Diarrhoeal Disease Research, Bangladesh (icddr,b)                                                                     | International Centre for Diarrhoeal Disease Research, Bangladesh (icddr,b)                                                                                                                                                                                                                                                                                                                                                                                 | Afrad MH; Bhuyian TR; Firdausi Qadri; Hamza O; Islam T; Khanam F                                                                                                                                                                                                                                                                                                                                                                                                                                                                                                  |
| EPI_ISL_1167164                                                                                                                                                                                                                                                                                                                                                                                                                                                                                                                                                                                                                                                                                                                                                                                                                                                                                                                                                                        | Iresset Genomics lab                                                                                                                           | L'Institut de Recherche en Santé, de Surveillance Epidémiologique et de Formation (IRESSEF)                                                                                                                                                                                                                                                                                                                                                                | Abdou PADANE; Abdouille KANTEH; Abdul Karim SESAY; Ambroise AHOUIDI; Aminata DIA; Aminata MBOUP; Astou Gaye GAYE; Barada Cisse; Biraahm Piere NDIAYE; Gora LO; Khadim GUEYE; Moustapha MBOW; Nafisatou LEYE; Ndeye Coumba Toure KANE; Papa Alassane DIAW; Souleymane MBOUP; Yacine DIA                                                                                                                                                                                                                                                                            |
| EPI_ISL_2506260, EPI_ISL_2506532, EPI_ISL_3230649, EPI_ISL_4233059                                                                                                                                                                                                                                                                                                                                                                                                                                                                                                                                                                                                                                                                                                                                                                                                                                                                                                                     | Islab, Pohjois-Savon aluelaboratorio                                                                                                           | Expert Microbiology, National Institute for Health and Welfare                                                                                                                                                                                                                                                                                                                                                                                             | Carita Savolainen-Kopra; Erika Lindh; Haider al-Hello; Jani Halkilahti; Kirsi Liitsola; Niina Ikonen; Olli Vapaalahti; Pekka Ellonen; Phuc Truong; Päivi Laurila; Ravi Kant; Sari Hannula; Soile Blomqvist; Teemu Smura                                                                                                                                                                                                                                                                                                                                           |
| EPI_ISL_5621007, EPI_ISL_5729212                                                                                                                                                                                                                                                                                                                                                                                                                                                                                                                                                                                                                                                                                                                                                                                                                                                                                                                                                       | Israel Central Virology laboratory                                                                                                             | Israel Central Virology laboratory                                                                                                                                                                                                                                                                                                                                                                                                                         | Danit Sofer; Efrat Dahan Bucris; Efrat Glick-Saar; Ella Mendelson; Gideon Rechavi; Michal Mandelboim; Miranda Geva; Neta Zuckerman; Omer Asraf; Oran Erster; Orna Mor                                                                                                                                                                                                                                                                                                                                                                                             |

|                                                                                                                                                                                                                                                                                                                                   |           |                                                                                                                        |                                                                                                                                               |                                                                                                                                                                                                                                                                                                                                                                                                                                                                                                                                                                                                                                                                                                                                                                                                                                                                                                                                                                                                                             |
|-----------------------------------------------------------------------------------------------------------------------------------------------------------------------------------------------------------------------------------------------------------------------------------------------------------------------------------|-----------|------------------------------------------------------------------------------------------------------------------------|-----------------------------------------------------------------------------------------------------------------------------------------------|-----------------------------------------------------------------------------------------------------------------------------------------------------------------------------------------------------------------------------------------------------------------------------------------------------------------------------------------------------------------------------------------------------------------------------------------------------------------------------------------------------------------------------------------------------------------------------------------------------------------------------------------------------------------------------------------------------------------------------------------------------------------------------------------------------------------------------------------------------------------------------------------------------------------------------------------------------------------------------------------------------------------------------|
| EPI_ISL_7133521,<br>EPI_ISL_7133547                                                                                                                                                                                                                                                                                               |           |                                                                                                                        |                                                                                                                                               |                                                                                                                                                                                                                                                                                                                                                                                                                                                                                                                                                                                                                                                                                                                                                                                                                                                                                                                                                                                                                             |
| EPI_ISL_1358829, EPI_ISL_1673961, EPI_ISL_1674039, EPI_ISL_1763261, EPI_ISL_1763901, EPI_ISL_2083119, EPI_ISL_2083686, EPI_ISL_2181963, EPI_ISL_2183392, EPI_ISL_2636290                                                                                                                                                          | see above | Israel Central Virology laboratory                                                                                     | Israel National Consortium for SARS-CoV-2 sequencing                                                                                          | Assaf Rokney; Dana Bar-Ilan; David A. Zeevi; Efrat Dahan Bucris; Efrat Glick-Saar; Efrat Rorman; Ella Mendelson; Ephraim Fass; Eva Nachum; Gal Zizelski Valenci; Gideon Rechavi; Israel Nissan; Joseph Jaffe; Maya Davidovich Cohen; Michal Mandelboim; Miranda Geva; Mor Rubinstein; Neta Zuckerman; Netanel Abu; Omer Murik; Omri Nayshool; Oran Erster; Orna Mor; Tzvia Mann                                                                                                                                                                                                                                                                                                                                                                                                                                                                                                                                                                                                                                             |
| EPI_ISL_1307873, EPI_ISL_1629874, EPI_ISL_1759585, EPI_ISL_2020568, EPI_ISL_2137509, EPI_ISL_2137699, EPI_ISL_2227142, EPI_ISL_9462229                                                                                                                                                                                            | see above | Istituto Zooprofilattico Sperimentale del Mezzogiorno                                                                  | TIGEM                                                                                                                                         | Antonio Grimaldi Patrizia Annunziata Francesco Panariello Biancamaria Pierri Claudia Tiberio Valentina Bouche Chiara Colantuono Maria Concetta Cuomo Denise Di Concilio Lucio Di Filippo Anna Manfredi Marcello Salvi Antonio Limone Luigi Atripaldi Pellegrino Cerino Andrea Ballabio Davide Cacchiarelli; Antonio Grimaldi Patrizia Annunziata Francesco Panariello Biancamaria Pierri Claudia Tiberio Teresa Giuliano Valentina Bouche Chiara Colantuono Maria Concetta Cuomo Denise Di Concilio Lucio Di Filippo Anna Manfredi Marcello Salvi Antonio Limone Luigi Atripaldi Pellegrino Cerino Andrea Ballabio Davide Cacchiarelli; Antonio Grimaldi Patrizia Annunziata Francesco Panariello Claudia Tiberio Teresa Giuliano Valentina Bouche Chiara Colantuono Michela Daniele Lucio Di Filippo Anna Manfredi Marcello Salvi Antonio Limone Luigi Atripaldi Andrea Ballabio Davide Cacchiarelli                                                                                                                       |
| EPI_ISL_1255009,<br>EPI_ISL_1255031,<br>EPI_ISL_1632986,<br>EPI_ISL_1692972,<br>EPI_ISL_2143828                                                                                                                                                                                                                                   |           | Istituto Zooprofilattico Sperimentale del Mezzogiorno                                                                  | Teleton Institute of Genetics and Medicine (TIGEM)                                                                                            | Antonio Grimaldi Patrizia Annunziata Francesco Panariello Biancamaria Pierri Claudia Tiberio Valentina Bouche Chiara Colantuono Maria Concetta Cuomo Denise Di Concilio Lucio Di Filippo Anna Manfredi Marcello Salvi Antonio Limone Luigi Atripaldi Pellegrino Cerino Andrea Ballabio Davide Cacchiarelli; Antonio Grimaldi Patrizia Annunziata Francesco Panariello Biancamaria Pierri Claudia Tiberio Teresa Giuliano Valentina Bouche Chiara Colantuono Maria Concetta Cuomo Denise Di Concilio Lucio Di Filippo Anna Manfredi Marcello Salvi Antonio Limone Luigi Atripaldi Pellegrino Cerino Andrea Ballabio Davide Cacchiarelli                                                                                                                                                                                                                                                                                                                                                                                      |
| EPI_ISL_1390708                                                                                                                                                                                                                                                                                                                   |           | Istituto Zooprofilattico Sperimentale del Mezzogiorno - Azienda Ospedaliera "Pugliese Ciaccio" di Catanzaro            | TIGEM                                                                                                                                         | Andrea Ballabio; Anna Manfredi; Antonio Grimaldi; Antonio Limone Pasquale Minchella Luigi Atripaldi Pellegrino Cerino; Biancamaria Pierri Claudia Tiberio Valentina Bouche; Chiara Colantuono; Davide Cacchiarelli; Denise Di Concilio; Francesco Panariello; Lucio Di Filippo; Marcello Salvi; Maria Concetta Cuomo; Patrizia Annunziata                                                                                                                                                                                                                                                                                                                                                                                                                                                                                                                                                                                                                                                                                   |
| EPI_ISL_2725326                                                                                                                                                                                                                                                                                                                   |           | Istituto Zooprofilattico Sperimentale del Mezzogiorno - Azienda Ospedaliera "Pugliese Ciaccio" di Catanzaro            | Teleton Institute of Genetics and Medicine (TIGEM)                                                                                            | Antonio Grimaldi Patrizia Annunziata Francesco Panariello Biancamaria Pierri Claudia Tiberio Teresa Giuliano Valentina Bouche Chiara Colantuono Maria Concetta Cuomo Denise Di Concilio Lucio Di Filippo Anna Manfredi Pasquale Minchella Marcello Salvi Antonio Limone Luigi Atripaldi Pellegrino Cerino Andrea Ballabio Davide Cacchiarelli                                                                                                                                                                                                                                                                                                                                                                                                                                                                                                                                                                                                                                                                               |
| EPI_ISL_632179<br>EPI_ISL_3031431<br>EPI_ISL_8253593                                                                                                                                                                                                                                                                              |           | James J. Peters VA Medical Center<br>Jaramogi Oginga Odinga Teaching and Referral Hospital<br>Jefferson Medical Center | New York City Public Health Laboratory<br>USAMRD-A, Basic Science Laboratory<br>WVU and Marshall University Combined Genomics Core Facilities | Jade Wang; et al.<br>Alan Lemtudo; Beth Mutai; Brian Andika; Carol Kifude; Clement Masakwe; Eric Muthanje; Esther Omuseni; Faith Sigei; Gathii Kimita; George Awinda; John Waitumbi; Josphat Nyataya; Rachel Githii; Rehema Liyai; Stephen Ochola<br>James Denvir; Peter Perrotta; Peter Stoilov; Ryan Percifield; Wesley Kimble                                                                                                                                                                                                                                                                                                                                                                                                                                                                                                                                                                                                                                                                                            |
| EPI_ISL_1041988,<br>EPI_ISL_5193889                                                                                                                                                                                                                                                                                               |           | Jessa                                                                                                                  | Jessa                                                                                                                                         | Cruys et al. on behalf of the Jessa_cmdLab; Severine Berden et al. on behalf of the Jessa_cmdLab                                                                                                                                                                                                                                                                                                                                                                                                                                                                                                                                                                                                                                                                                                                                                                                                                                                                                                                            |
| EPI_ISL_5412293<br>EPI_ISL_5543592                                                                                                                                                                                                                                                                                                |           | Johns Hopkins Hospital Department of Pathology<br>Jose B. Lingad Memorial General Hospital                             | Johns Hopkins Hospital Department of Pathology<br>Philippine Genome Center                                                                    | C. Paul Morris; David Gaston; Heba H. Mostafa; Julie M. Norton; Matthew Schwartz<br>Alethea R. de Guzman; Anna Ong-Lim; Arienne A. Zamora; Benedict A. Maralit; Carlo M. Lapid; Celia Carlos; Cynthia P. Saloma; Devon Ray Pacial; Diomedes A. Cariño; Edsel Maurice Salvana; El King D. Morado; Elcid Aaron R. Pangilinan; Eva Maria Cutiungco-de la Paz; Francis A. Tabizo; Henrietta Marie Rodriguez; Jaime C. Montoya; Jan Michael C. Yap; Jarvin E. Nipales; Jo-Hannah S. Lames; John Q. Wong; Joshua Gregor A. Dizon; Juan Antonio R. Magalang; Karol Sophia Agape R. Padilla; Kenneth M. Kim; Kris P. Punayan; Kristina Patriz Dela Cruz; Lindsay Clare D.L. Carandang; Ma. Exanil Planting; Marc Edsel C. Ayes; Maria Rosario Singh-Vergeire; Maria Sofia L. Yangson; Marielle M. Gamboa; Marissa Alejandria; Niña Francesca Bustamante; Razel Nikka M. Hao; Renato Jacinto Q. Mantaring; Rianna Patricia S. Cruz; Shiela Mae M. Araiza; Yvonne Valerie Austria; Zipporah Mariebelle R. Enriquez; Zryel V. Mollejon |
| EPI_ISL_6851991                                                                                                                                                                                                                                                                                                                   |           | K NARAYANPURA URBAN PRIMARY HEALTH CENTER                                                                              | National Centre for Biological Sciences, TIFR - Rockefeller Foundation                                                                        | Awadshah Pandit; Darshan Sreenivas; Dimple Notani; Lakshminarayanan CP; Manisha Bharadwaj; Satyajit Mayor; Uma Ramakrishnan                                                                                                                                                                                                                                                                                                                                                                                                                                                                                                                                                                                                                                                                                                                                                                                                                                                                                                 |
| EPI_ISL_6340451,<br>EPI_ISL_6584498                                                                                                                                                                                                                                                                                               |           | KANSAI MEDIKAL UNIVERSITY MEDICAL CENTER                                                                               | KANSAI MEDIKAL UNIVERSITY MEDICAL CENTER                                                                                                      | Masami Kashiwara                                                                                                                                                                                                                                                                                                                                                                                                                                                                                                                                                                                                                                                                                                                                                                                                                                                                                                                                                                                                            |
| EPI_ISL_7237107<br>EPI_ISL_2582932                                                                                                                                                                                                                                                                                                |           | KEMRI-Wellcome Trust Research Programme, Kilifi<br>KIMBERLEY LABORATORY                                                | KEMRI-Wellcome Trust Research Programme, Kilifi<br>National Institute for Communicable Diseases of the National Health Laboratory Service     | Agoti C.; D.J.Nokes; Githinji G.; Lambisia A.; Makori T.; Mburu M.W.; Mohamed K.S.; Morobe J.; Ndwiwa L.; Ochola I.; Ongera E.; de Laurent Z.<br>Amoako DG; Bhiman JN; Everatt J; Ismail A; Mahlangu B; Mnguni A; Mohale T; Ntuli N; Scheepers C                                                                                                                                                                                                                                                                                                                                                                                                                                                                                                                                                                                                                                                                                                                                                                            |
| EPI_ISL_7265336                                                                                                                                                                                                                                                                                                                   |           | KS Health and Environmental Laboratories                                                                               | Centers for Disease Control and Prevention Division of Viral Diseases, Pathogen Discovery                                                     | Alex Burgin; Ben Rambo-Martin; Clinton Paden; Dakota Howard; Dave Wentworth; Dhwanj Batra; Jasmine Padilla; Joseph Madden; Justin Lee; Kristen Knipe; Kristine Lacek; Mark Burroughs; Matthew Schmerer; Meghan Bentz; Mili Sheth; Peter Cook; Sam Shepard; Sarah Nobles; Vivien Dugan; Yvette Unoaumhi                                                                                                                                                                                                                                                                                                                                                                                                                                                                                                                                                                                                                                                                                                                      |
| EPI_ISL_4174710,<br>EPI_ISL_7799653,<br>EPI_ISL_8598963                                                                                                                                                                                                                                                                           |           | KSL Diagnostics                                                                                                        | University at Buffalo Genomics and Bioinformatics Core                                                                                        | Alyssa Pohman; Amanda Boccolucci; Brandon Marzullo; Donald Yergeau; Jennifer Surtees; Jonathan Bard; Natalie Lamb; Norma Nowak                                                                                                                                                                                                                                                                                                                                                                                                                                                                                                                                                                                                                                                                                                                                                                                                                                                                                              |
| EPI_ISL_888707, EPI_ISL_890296, EPI_ISL_913814, EPI_ISL_1049103, EPI_ISL_1322611, EPI_ISL_1380656, EPI_ISL_2424703, EPI_ISL_2425320, EPI_ISL_2834809, EPI_ISL_2834904, EPI_ISL_2864315, EPI_ISL_2864614, EPI_ISL_2964819, EPI_ISL_5368511, EPI_ISL_5403697, EPI_ISL_7590074, EPI_ISL_7982700                                      | see above | KU Leuven, Rega Institute, Clinical and Epidemiological Virology                                                       | KU Leuven, Rega Institute, Clinical and Epidemiological Virology                                                                              | Bert Vanmechelen; Joan Marti-Carreras; Piet Maes; Tony Wawina-Bokalanga                                                                                                                                                                                                                                                                                                                                                                                                                                                                                                                                                                                                                                                                                                                                                                                                                                                                                                                                                     |
| EPI_ISL_8110035                                                                                                                                                                                                                                                                                                                   |           | Kagoshima Prefectural Institute for Environmental Research and Public Health                                           | Kagoshima Prefectural Institute for Environmental Research and Public Health                                                                  | Kanji Ishitani; Kazuki Manabe; Kentaro Itokawa; Makoto Kuroda; Mami Yamamoto; Masanori Hashino; Naomi Shinkawa; Rina Tanaka; Takako Kiyotake; Tsuyoshi Sekizuka; Yuka Hamada                                                                                                                                                                                                                                                                                                                                                                                                                                                                                                                                                                                                                                                                                                                                                                                                                                                |
| EPI_ISL_4102507,<br>EPI_ISL_7889284,<br>EPI_ISL_9413208                                                                                                                                                                                                                                                                           |           | Kaiser Permanente NW Reginal Lab                                                                                       | OHSU MM Lab                                                                                                                                   | Amber Halse; Jeannine Lama; Xuan Qin; Yun Wu                                                                                                                                                                                                                                                                                                                                                                                                                                                                                                                                                                                                                                                                                                                                                                                                                                                                                                                                                                                |
| EPI_ISL_7648964, EPI_ISL_8476655, EPI_ISL_8477070, EPI_ISL_8479188, EPI_ISL_9098511, EPI_ISL_9534688, EPI_ISL_9535529, EPI_ISL_9536233, EPI_ISL_9539895, EPI_ISL_9541913, EPI_ISL_9543174, EPI_ISL_9543209, EPI_ISL_9543909, EPI_ISL_9545581, EPI_ISL_9546382, EPI_ISL_9546902, EPI_ISL_9547125, EPI_ISL_9548693, EPI_ISL_9548912 | see above | Kaiser Permanente Southern California                                                                                  | Helix                                                                                                                                         | Helix; Kaiser Permanente Southern California                                                                                                                                                                                                                                                                                                                                                                                                                                                                                                                                                                                                                                                                                                                                                                                                                                                                                                                                                                                |
| EPI_ISL_5768191<br>EPI_ISL_966346, EPI_ISL_1263327, EPI_ISL_2772580, EPI_ISL_2833928, EPI_ISL_3899199, EPI_ISL_3939286, EPI_ISL_7372276                                                                                                                                                                                           | see above | Kanagawa Prefectural Institute of Public Health<br>Kansas Health and Environmental Lab                                 | Kanagawa Prefectural Institute of Public Health<br>Kansas Health and Environmental Lab                                                        | Itsumi Toyokawa; Junichi Sakuragi; Kentaro Itokawa; Makiko Kondo; Makoto Kuroda; Masanori Hashino; Rieko Suzuki; Rina Tanaka; Sumi Watanabe; Takako Sano; Takayuki Hishiki; Tomohiko Takasaki; Tsuyoshi Sekizuka<br>Amanda Bradley; Ben Olsen; Carissa Robertson; Carrie Welch; Gary Burruss; Jonathan Barnell; Katherine Wiggins; Meg Wise; Mike Grose; Paige Drury; Victor Anderson; and Phil Adam                                                                                                                                                                                                                                                                                                                                                                                                                                                                                                                                                                                                                        |
| EPI_ISL_6033285                                                                                                                                                                                                                                                                                                                   |           | Kantonsspital Baden AG                                                                                                 | Institute of Medical Virology                                                                                                                 | Alexandra Trkola; Annette Audigé; Catharine Aquino; Cyril Shah; Daniel Ehrsam; Gabriela Ziltener; Guido Bloembergen; Hubert Rehrauer; Isabel Stümmgen; Joel Wirz; Jon Huder; Jürg Böni; Kevin Steiner; Maria Grünberg; Maryam Zaheri; Michael Huber; Riccarda Capaul; Stefan Schmutz; Verena Kufner; Weihong Qi                                                                                                                                                                                                                                                                                                                                                                                                                                                                                                                                                                                                                                                                                                             |
| EPI_ISL_3946579,<br>EPI_ISL_4175226,<br>EPI_ISL_4330663,<br>EPI_ISL_5842698,<br>EPI_ISL_6719631                                                                                                                                                                                                                                   |           | Karolinska University Hospital Huddinge                                                                                | Karolinska University Hospital                                                                                                                | Annelie Bjerkner; Isak Sylvin; Jan Albert; Karolina Ininbergs; Lina Guerra Blomqvist; Lynda Eneh; Martin Ekman; Martina Wahlund; Robert Dyrdak; Sandra Brodsson; Tanja Normark; Tobias Allander; Valtteri Wirta; Zhibing Yun                                                                                                                                                                                                                                                                                                                                                                                                                                                                                                                                                                                                                                                                                                                                                                                                |
| EPI_ISL_3588635, EPI_ISL_3588708, EPI_ISL_4258786, EPI_ISL_5200120, EPI_ISL_6343295, EPI_ISL_6374981, EPI_ISL_6564394, EPI_ISL_8184595                                                                                                                                                                                            | see above | Karolinska University Hospital Solna                                                                                   | Karolinska University Hospital                                                                                                                | Annelie Bjerkner; Annika Tiveljung Lindell; Henning Onsbring; Isak Sylvin; Jan Albert; Karina Hentrich; Karolina Ininbergs; Lina Guerra Blomqvist; Lynda Eneh; Maria Ropat; Martin Ekman; Martina Wahlund; Natalija Gerasimcik; Robert Dyrdak; Sandra Brodsson; Shambhu Ganeshappa Aralaguppe; Tanja Normark; Tobias Allander; Valtteri Wirta; Zhibing Yun                                                                                                                                                                                                                                                                                                                                                                                                                                                                                                                                                                                                                                                                  |
| EPI_ISL_2820392                                                                                                                                                                                                                                                                                                                   |           | Kasane Primary Hospital Laboratory                                                                                     | Botswana Harvard HIV Reference Laboratory                                                                                                     | Agnes Karutwaeng; Boitumelo Zuze; Botshelo Radibe; Dorcas Maruapula; Joseph Makhema; Keoratlile Ntshambiwa; Legodile Kooepite; Madisa Mine; Mosepele Mosepele; Ontlametse T. Bareng; Roger Shapiro; Rose Munyere; Shahin Lockman; Sikhulile Moyo; Simani Gasetse; Thongbotho Mphoyakgosi; Wonderful T. Choga                                                                                                                                                                                                                                                                                                                                                                                                                                                                                                                                                                                                                                                                                                                |
| EPI_ISL_9224787,<br>EPI_ISL_9224922                                                                                                                                                                                                                                                                                               |           | Kawasaki City Institute for Public Health                                                                              | Kawasaki City Institute for Public Health                                                                                                     | Ayako Komane; Azumi Wakana; Chihiro Arai; Hideaki Shimizu; Kentaro Itokawa; Kouhei Natsu; Kuniharu Sasaki; Makoto Kuroda; Masanori Hashino; Rina Tanaka; Tsuyoshi Sekizuka                                                                                                                                                                                                                                                                                                                                                                                                                                                                                                                                                                                                                                                                                                                                                                                                                                                  |
| EPI_ISL_1973101<br>EPI_ISL_2200501,<br>EPI_ISL_4348313,<br>EPI_ISL_4419051                                                                                                                                                                                                                                                        |           | Keio University School of Medicine<br>Kentucky State Public Health Lab                                                 | Keio University School of Medicine<br>Kentucky State Public Health Lab                                                                        | Haruhiko Siomi; Hirotosugu Ishizu; Kenjiro Kosaki; Kodai Abe; Yuka Iwasaki<br>Anjaya Tummala; Chitralipi Kattunga; Joshua Tobias; Karim George; Matthew Johnson; Rachel Zinner; Rhonda Lucas; Vaneet Arora; William Grooms                                                                                                                                                                                                                                                                                                                                                                                                                                                                                                                                                                                                                                                                                                                                                                                                  |
| EPI_ISL_4748411,<br>EPI_ISL_4748430                                                                                                                                                                                                                                                                                               |           | Kerala State SARS-COV-2 Genome Surveillance Programme (GENESCOV2)                                                      | GENESCOV2 at CSIR Institute of Genomics and Integrative Biology                                                                               | Kerala State SARS-COV-2 Genome Surveillance Programme (GENESCOV2)                                                                                                                                                                                                                                                                                                                                                                                                                                                                                                                                                                                                                                                                                                                                                                                                                                                                                                                                                           |
| EPI_ISL_8437222                                                                                                                                                                                                                                                                                                                   |           | Khueang Nai Hospital                                                                                                   | Division of Genomic Medicine and Innovation support, Department of Medical Sciences, Ministry of Public Health, Thailand                      | Archawin Rojanawiat; Jirapha Pakdee; Natthakul Bunneang; Nuanjun Wichukhinda; Penpittha Thawong; Pilailuk Akkapaiboon Okada; Puntharika Piboonsiri; Surakameth Mahasirimongkol; Waritta Sawaengdee                                                                                                                                                                                                                                                                                                                                                                                                                                                                                                                                                                                                                                                                                                                                                                                                                          |
| EPI_ISL_5884554                                                                                                                                                                                                                                                                                                                   |           | King Prajadhipok Memorial Hospital                                                                                     | Division of Genomic Medicine and Innovation support, Department of Medical Sciences, Ministry of Public Health, Thailand                      | Archawin Rojanawiat; Jirapha Pakdee; Natthakul Bunneang; Nuanjun Wichukhinda; Penpittha Thawong; Pilailuk Akkapaiboon Okada; Puntharika Piboonsiri; Surakameth Mahasirimongkol; Waritta Sawaengdee                                                                                                                                                                                                                                                                                                                                                                                                                                                                                                                                                                                                                                                                                                                                                                                                                          |
| EPI_ISL_6695467<br>EPI_ISL_538342                                                                                                                                                                                                                                                                                                 |           | King Prajadhipok Memorial Hospital Pra Pok Klao hospital<br>Kingston Health Sciences Centre / Queen's University       | Prince of Songkhla University<br>Ontario Institute for Cancer Research                                                                        | Samonrapat Surasombutpathana; Surakameth Mahasirimongkol; Surasak Sangkhathat; Thanit Sila; Wilson laochareousuk<br>Bernard Lam; Calvin Sjaarda; Ilina Lungu; Jared T. Simpson; Katya Douchant; Lawrence E Heisler; Michael Laszloffy; Paul Krzyzanowski; Premeet M. Sheth; Richard de Borja; Robert Colautti                                                                                                                                                                                                                                                                                                                                                                                                                                                                                                                                                                                                                                                                                                               |
| EPI_ISL_1252830                                                                                                                                                                                                                                                                                                                   |           | Klaipeda University Hospital                                                                                           | Vilnius University Hospital Santaros Klinikos, Center of Laboratory Medicine                                                                  | Daniel Naumovas; Dovile Ezerskyte; Gytis Dudas; Ingrida Olendraite; Laimonas Griskevicius; Ligita Raugaite; Mindaugas Stoksus; Monika Katenaite; Rimvydas Norvicius                                                                                                                                                                                                                                                                                                                                                                                                                                                                                                                                                                                                                                                                                                                                                                                                                                                         |
| EPI_ISL_4235252                                                                                                                                                                                                                                                                                                                   |           | Klang Hospital                                                                                                         | Division of Genomic Medicine and Innovation support, Department of Medical Sciences, Ministry of Public Health, Thailand                      | Archawin Rojanawiat; Jirapha Pakdee; Natthakul Bunneang; Nuanjun Wichukhinda; Penpittha Thawong; Pilailuk Akkapaiboon Okada; Puntharika Piboonsiri; Surakameth Mahasirimongkol; Waritta Sawaengdee                                                                                                                                                                                                                                                                                                                                                                                                                                                                                                                                                                                                                                                                                                                                                                                                                          |
| EPI_ISL_8174695,<br>EPI_ISL_9497455                                                                                                                                                                                                                                                                                               |           | Klinika za infekтивne bolesti "Dr. Fran Mihaljević"                                                                    | Hrvatski zavod za javno zdravstvo                                                                                                             | Anita Jurić; Dragan Jurić; Irena Tabain; Ivana Ferencak; Josipa Kuzle                                                                                                                                                                                                                                                                                                                                                                                                                                                                                                                                                                                                                                                                                                                                                                                                                                                                                                                                                       |



|                                                                                                                                                                                           |                                                                               |                                                                                                                    |                                                                                                                                                                                                                                                                                                                                                                                                                                                                                                                                                                                                                             |
|-------------------------------------------------------------------------------------------------------------------------------------------------------------------------------------------|-------------------------------------------------------------------------------|--------------------------------------------------------------------------------------------------------------------|-----------------------------------------------------------------------------------------------------------------------------------------------------------------------------------------------------------------------------------------------------------------------------------------------------------------------------------------------------------------------------------------------------------------------------------------------------------------------------------------------------------------------------------------------------------------------------------------------------------------------------|
| EPI_ISL_4060732,<br>EPI_ISL_4356826,<br>EPI_ISL_5063382,<br>EPI_ISL_6332586                                                                                                               | Klinikum Wels-Grieskirchen                                                    | Berghaler laboratory, CeMM Research Center for Molecular Medicine of the Austrian Academy of Sciences              | Andreas Berghaler; Anna Schedl; Bekir Erguner; Benedikt Agerer; Christoph Bock; Fabian Amman; Jan Laine; Lukas Endler; Maelle Le Moing; Martin Senekowitsch; Matthew Thornton; Michael Schuster; Michelle Chan; Petr Triska; Thomas Penz                                                                                                                                                                                                                                                                                                                                                                                    |
| EPI_ISL_6361272,<br>EPI_ISL_9121805                                                                                                                                                       | Klinisch Laboratorium ZNA                                                     | Klinisch Laboratorium ZNA                                                                                          | Verstrepen et al.                                                                                                                                                                                                                                                                                                                                                                                                                                                                                                                                                                                                           |
| EPI_ISL_1968704                                                                                                                                                                           | Klinisch mikrobiologi, Region Västerbotten                                    | CBRN Defence and Security, Swedish Defence Research Agency                                                         | Andreas Sjödin; Anna-Lena Johansson; Annika Allard; Annika Osterman; Caroline Öhrman; David Sundell; Emelie Näslund Salomonsson; Ingrid Daclin; Jonas Näslund; Kerstin Myrtennäs; Linda Karlsson; Malin Granberg; Mats Forsman; Stina Bäckman                                                                                                                                                                                                                                                                                                                                                                               |
| EPI_ISL_3871964,<br>EPI_ISL_7098667                                                                                                                                                       | Kochi Public Health and Environmental Science Research Institute              | Kochi Public Health and Environmental Science Research Institute                                                   | Kentaro Itokawa; Makoto Kuroda; Masanori Hashino; Rina Tanaka; Tsuyoshi Sekizuka; Wataru Satou                                                                                                                                                                                                                                                                                                                                                                                                                                                                                                                              |
| EPI_ISL_4649663,<br>EPI_ISL_5762241                                                                                                                                                       | Kumamoto Prefectural Institute of Public-Health and Environmental Science     | Kumamoto Prefectural Institute of Public-Health and Environmental Science                                          | Atsumi Obara; Kentaro Itokawa; Makoto Kuroda; Masanori Hashino; Rina Tanaka; Tsuyoshi Sekizuka                                                                                                                                                                                                                                                                                                                                                                                                                                                                                                                              |
| EPI_ISL_4649774                                                                                                                                                                           | Kyoto Prefectural Institute Of Public Health And Environment                  | Kyoto Prefectural Institute Of Public Health And Environment                                                       | Akira Kotera; Kenji Konaka; Kentaro Itokawa; Makoto Kuroda; Masanori Hashino; Miki Tsuda; Nana Horikawa; Norio Asai; Rina Tanaka; Tsuyoshi Sekizuka; Yasushi Fujimoto; Yoshihiro Tanabe; Yoshiyuki Kawahara; Yuri Sakai                                                                                                                                                                                                                                                                                                                                                                                                     |
| EPI_ISL_6288098                                                                                                                                                                           | LABO BIOSEVRES THOUARS                                                        | CNR Virus des Infections Respiratoires - France SUD                                                                | Antonin Bal; Bruno Lina; Bruno Simon; Gregory Destras; Gwendolynne Burfin; Hadrien Regue; Laurence Josset; Martine Valette; Quentin Semanas                                                                                                                                                                                                                                                                                                                                                                                                                                                                                 |
| EPI_ISL_2278704                                                                                                                                                                           | LABO DES CEDRES                                                               | CHU Purpan - Laboratoire de Virologie - Institut Fédératif de Biologie                                             | Bulach T.; Donnadieu C.; Izopet J.; Latour J.; Milhes M.; Nicot F.; Ranger N.; Salin G.; Tremeaux P.                                                                                                                                                                                                                                                                                                                                                                                                                                                                                                                        |
| EPI_ISL_3379210                                                                                                                                                                           | LABORATOIRE ACCOLAB SUD OUEST                                                 | CNR Virus des Infections Respiratoires - France SUD                                                                | Antonin Bal; Bruno Lina; Gregory Destras; Gwendolynne Burfin; Hadrien Regue; Laurence Josset; Martine Valette; Quentin Semanas                                                                                                                                                                                                                                                                                                                                                                                                                                                                                              |
| EPI_ISL_7208084                                                                                                                                                                           | LABORATOIRE BIOALLIANCE                                                       | CNR Virus des Infections Respiratoires - France SUD                                                                | Antonin Bal; Bruno Lina; Bruno Simon; Gregory Destras; Gwendolynne Burfin; Hadrien Regue; Laurence Josset; Martine Valette; Quentin Semanas                                                                                                                                                                                                                                                                                                                                                                                                                                                                                 |
| EPI_ISL_5128385,<br>EPI_ISL_5914074                                                                                                                                                       | LABORATOIRE BIOESTEREL                                                        | CNR Virus des Infections Respiratoires - France SUD                                                                | Antonin Bal; Bruno Lina; Bruno Simon; Gregory Destras; Gwendolynne Burfin; Hadrien Regue; Laurence Josset; Martine Valette; Quentin Semanas                                                                                                                                                                                                                                                                                                                                                                                                                                                                                 |
| EPI_ISL_6846046                                                                                                                                                                           | LABORATOIRE BIOLAB AVENIR                                                     | CNR Virus des Infections Respiratoires - France SUD                                                                | Antonin Bal; Bruno Lina; Bruno Simon; Gregory Destras; Gwendolynne Burfin; Hadrien Regue; Laurence Josset; Martine Valette; Quentin Semanas                                                                                                                                                                                                                                                                                                                                                                                                                                                                                 |
| EPI_ISL_7208683                                                                                                                                                                           | LABORATOIRE BOUVIER                                                           | CNR Virus des Infections Respiratoires - France SUD                                                                | Antonin Bal; Bruno Lina; Bruno Simon; Gregory Destras; Gwendolynne Burfin; Hadrien Regue; Laurence Josset; Martine Valette; Quentin Semanas                                                                                                                                                                                                                                                                                                                                                                                                                                                                                 |
| EPI_ISL_4804380,<br>EPI_ISL_9425186                                                                                                                                                       | LABORATOIRE CREAVALLEE                                                        | CNR Virus des Infections Respiratoires - France SUD                                                                | Antonin Bal; Bruno Lina; Bruno Simon; Gregory Destras; Gwendolynne Burfin; Hadrien Regue; Laurence Josset; Martine Valette; Quentin Semanas; Théophile Boyer                                                                                                                                                                                                                                                                                                                                                                                                                                                                |
| EPI_ISL_3472955                                                                                                                                                                           | LABORATOIRE DU MOLE SELAS BIO-VAL                                             | CNR Virus des Infections Respiratoires - France SUD                                                                | Antonin Bal; Bruno Lina; Gregory Destras; Gwendolynne Burfin; Hadrien Regue; Laurence Josset; Martine Valette; Quentin Semanas                                                                                                                                                                                                                                                                                                                                                                                                                                                                                              |
| EPI_ISL_6077087,<br>EPI_ISL_6290951,<br>EPI_ISL_8297688,<br>EPI_ISL_8297694                                                                                                               | LABORATOIRE FORTE BIO DAX                                                     | CNR Virus des Infections Respiratoires - France SUD                                                                | Antonin Bal; Bruno Lina; Bruno Simon; Gregory Destras; Gwendolynne Burfin; Hadrien Regue; Laurence Josset; Martine Valette; Quentin Semanas                                                                                                                                                                                                                                                                                                                                                                                                                                                                                 |
| EPI_ISL_4326012                                                                                                                                                                           | LABORATOIRE LABAZUR                                                           | CNR Virus des Infections Respiratoires - France SUD                                                                | Antonin Bal; Bruno Lina; Gregory Destras; Gwendolynne Burfin; Hadrien Regue; Laurence Josset; Martine Valette; Quentin Semanas                                                                                                                                                                                                                                                                                                                                                                                                                                                                                              |
| EPI_ISL_7892016                                                                                                                                                                           | LABORATOIRE NOVELAB                                                           | CNR Virus des Infections Respiratoires - France SUD                                                                | Antonin Bal; Bruno Lina; Bruno Simon; Gregory Destras; Gwendolynne Burfin; Hadrien Regue; Laurence Josset; Martine Valette; Quentin Semanas                                                                                                                                                                                                                                                                                                                                                                                                                                                                                 |
| EPI_ISL_4605705                                                                                                                                                                           | LABORATOIRE UNILIANS DECINES                                                  | CNR Virus des Infections Respiratoires - France SUD                                                                | Antonin Bal; Bruno Lina; Gregory Destras; Gwendolynne Burfin; Hadrien Regue; Laurence Josset; Martine Valette; Quentin Semanas                                                                                                                                                                                                                                                                                                                                                                                                                                                                                              |
| EPI_ISL_3382455                                                                                                                                                                           | LABORATOIRE d'ANALYSES DE BIOLOGIE MEDICALES PUILBOREAU                       | CNR Virus des Infections Respiratoires - France SUD                                                                | Antonin Bal; Bruno Lina; Gregory Destras; Gwendolynne Burfin; Hadrien Regue; Laurence Josset; Martine Valette; Quentin Semanas                                                                                                                                                                                                                                                                                                                                                                                                                                                                                              |
| EPI_ISL_5646783                                                                                                                                                                           | LABORATORIO DE FRANCA                                                         | Instituto Butantan                                                                                                 | Antonio Jorge Martins; Claudia Renata dos Santos Barros; David Schlesinger; Debora Botequiu Moretti; Dimas Tadeu Covas; Elaine Cristina Marquize; Elaine Vieira Santos; Evandra Strazza Rodrigues; Heidge Fukumasu; Jayme Augusto de Souza-Neto; José Salvatore Leister Patané; Luiz Alcantara; Luiz Lehmann Coutinho; Maria Carolina Elias; Maurício Lacerda Nogueira; Rafael dos Santos Bezerra; Raul Machado Neto; Rejane Maria Tommasini Grotto; Ricardo Haddad; Sandra Coccuzzo Sampaia Vessoni; Simone Kashima; Svetoslav Nanev Slavov; Vincent Louis Viala                                                           |
| EPI_ISL_4747176                                                                                                                                                                           | LABORATORIO MUNICIPAL DE ANALISES CLINICAS DE RIO CLARO                       | Instituto Butantan                                                                                                 | Antonio Jorge Martins; Claudia Renata dos Santos Barros; David Schlesinger; Debora Botequiu Moretti; Dimas Tadeu Covas; Elaine Cristina Marquize; Elaine Vieira Santos; Evandra Strazza Rodrigues; Heidge Fukumasu; Jayme Augusto de Souza-Neto; José Salvatore Leister Patané; Luiz Alcantara; Luiz Lehmann Coutinho; Maria Carolina Elias; Maurício Lacerda Nogueira; Rafael dos Santos Bezerra; Raul Machado Neto; Rejane Maria Tommasini Grotto; Ricardo Haddad; Sandra Coccuzzo Sampaia Vessoni; Simone Kashima; Svetoslav Nanev Slavov; Vincent Louis Viala                                                           |
| EPI_ISL_8401495                                                                                                                                                                           | LABORATORIO MUNICIPAL DE PIRACICABA                                           | Instituto Butantan                                                                                                 | Antonio Jorge Martins; Claudia Renata dos Santos Barros; David Schlesinger; Debora Botequiu Moretti; Dimas Tadeu Covas; Elaine Cristina Marquize; Elaine Vieira Santos; Evandra Strazza Rodrigues; Heidge Fukumasu; Jayme Augusto de Souza-Neto; José Salvatore Leister Patané; Luiz Alcantara; Luiz Lehmann Coutinho; Maria Carolina Elias; Maurício Lacerda Nogueira; Rafael dos Santos Bezerra; Raul Machado Neto; Rejane Maria Tommasini Grotto; Ricardo Haddad; Sandra Coccuzzo Sampaia Vessoni; Simone Kashima; Svetoslav Nanev Slavov; Vincent Louis Viala                                                           |
| EPI_ISL_4551627,<br>EPI_ISL_5619178                                                                                                                                                       | LABORATORIUM BADAŃ KLINICZNYCH WSSE w OPOLU                                   | Wojewódzka Stacja Sanitarno-Epidemiologiczna w Katowicach                                                          | Beata Rozwadowska                                                                                                                                                                                                                                                                                                                                                                                                                                                                                                                                                                                                           |
| EPI_ISL_8623172                                                                                                                                                                           | LABORATÓRIO DE VIROLOGIA MOLECULAR FIOCRUZ/RO                                 | Laboratório de Ecologia de Doenças Transmissíveis na Amazônia, Instituto Leonidas e Maria Deane - Fiocruz Amazônia | Aline Linhares Ferreira de Melo Mendonça; Ana Maisa Passos; André Corado; Camila Flávia Gomes Azzi. Arlesson Viana Da Silva; Celina Aparecida Bertoni Lugtenburg; Cicileia Correia da Silva; Dejanane Silva; Deusiene Souza Vieira Dall'Acqua; Felipe Naveca on behalf of the Fiocruz COVID-19 Genomic Surveillance Network; Luciana Gonçalves; Maria Júlia Brandão; Matilde Mejia; Nadson Gasparelo; Tércio Rocca; Valdinete Nascimento; Victor Souza                                                                                                                                                                      |
| EPI_ISL_2488783                                                                                                                                                                           | LACEN - Laboratório Central de Saúde Pública do Roraima                       | Evarandro Chagas Institute                                                                                         | A.M.; Barbagelata; E.C.; E.M.A.; Ferreira; J.A.; Junior; K.C.; L.C.; L.S.; M.C.; P.S.; Pinheiro; Santos; Silva; Sousa; Sousa Junior; W.D.C.; da Silva                                                                                                                                                                                                                                                                                                                                                                                                                                                                       |
| EPI_ISL_717905                                                                                                                                                                            | LACEN RJ - Noel Nutels                                                        | Bioinformatics Laboratory / LNCC                                                                                   | Alexandra L Gerber; Amílcar Tanuri; Ana Paula de C Guimarães; Ana Tereza R de Vasconcelos; Andréa Cony Cavalcanti; Carolina M Voloch; Claudia dos Santos Rodrigues; Cynthia C Cardoso; Diana Mariani; Luiz G P de Almeida; Otávio Bustrolini; Ronaldo da Silva F Jr; Terezinha M P P Castifeira                                                                                                                                                                                                                                                                                                                             |
| EPI_ISL_4487055,<br>EPI_ISL_5254360                                                                                                                                                       | LACEN/PE                                                                      | WallauLab on behalf of Fiocruz COVID-19 Genomic Surveillance Network                                               | Alexandre Freitas da Silva; Antonio Marinho da Silva Neto; Cassia Docena; Constância Flávia Junqueira Ayres; Filipe Zimmer Dezordi; Gabriel Luz Wallau; Gustavo Barbosa de Lima; Lais Ceschini Machado; Lilian Caroliny Amorim Silva; Marcelo Henrique dos Santos Paiva; Matheus Filgueira Bezerra; Sival Pinto Brandão Filho                                                                                                                                                                                                                                                                                               |
| EPI_ISL_8055916                                                                                                                                                                           | LACEN/PI                                                                      | WallauLab on behalf of Fiocruz COVID-19 Genomic Surveillance Network                                               | Adelino Soares Lima Neto; Alexandre Freitas da Silva; Antônio Marinho da Silva Neto; Cassia Docena; Constância Flávia Junqueira Ayres; Filipe Zimmer Dezordi; Gabriel Luz Wallau; Gustavo Barbosa de Lima; Hellen de Oliveira Amaral; Jacenir Reis dos Santos Mallet; Joana Carolina Viana Lima; Lais Ceschini Machado; Leandro de Mattos; Lilian Caroliny Amorim Silva; Marcela de Lacerda Valença Queiroz; Marcelo Adriano da Cunha e Silva Vieira; Marcelo Henrique dos Santos Paiva; Matheus Filgueira Bezerra; Sival Pinto Brandão Filho; Túlio de Lima Campos; Vladimir Costa Silva; Walterlene de Carvalho Gonçalves |
| EPI_ISL_5193592                                                                                                                                                                           | LACEN/RR                                                                      | Laboratorio de Ecologia de Doencas Transmissiveis na Amazonia, Instituto Leonidas e Maria Deane - Fiocruz Amazonia | André Corado; Cátia Alexandra Ribeiro Menezes; Felipe Naveca; Fernanda Nascimento; George Silva; Ilma de Aguiar Antonis; Janis Cassimiro Lopes; Luciana Gonçalves; Maria Júlia Brandão; Matilde Mejia; Prícila Carlos Veloso; Rodrigo Melo Maito; Valdinete Nascimento; Victor Souza                                                                                                                                                                                                                                                                                                                                        |
| EPI_ISL_4038764, EPI_ISL_4040532, EPI_ISL_4609078, EPI_ISL_4609177, EPI_ISL_5116598, EPI_ISL_5675015, EPI_ISL_6186948, EPI_ISL_6203585, EPI_ISL_6466209, EPI_ISL_7117590, EPI_ISL_8238829 | see above                                                                     | LADR Zentrallabor DR. Kramer & Kollegen Geesthacht                                                                 | Robert Koch Institute                                                                                                                                                                                                                                                                                                                                                                                                                                                                                                                                                                                                       |
| EPI_ISL_7607934,<br>EPI_ISL_8669606                                                                                                                                                       | LAM BIO 86 SITE DE CHAUMONT                                                   | CNR Virus des Infections Respiratoires - France SUD                                                                | Antonin Bal; Bruno Lina; Bruno Simon; Gregory Destras; Gwendolynne Burfin; Hadrien Regue; Laurence Josset; Martine Valette; Quentin Semanas; Théophile Boyer                                                                                                                                                                                                                                                                                                                                                                                                                                                                |
| EPI_ISL_7890880                                                                                                                                                                           | LAM BIOPOLE ORTHEZ                                                            | CNR Virus des Infections Respiratoires - France SUD                                                                | Antonin Bal; Bruno Lina; Bruno Simon; Gregory Destras; Gwendolynne Burfin; Hadrien Regue; Laurence Josset; Martine Valette; Quentin Semanas                                                                                                                                                                                                                                                                                                                                                                                                                                                                                 |
| EPI_ISL_3472842,<br>EPI_ISL_4804856                                                                                                                                                       | LAM CERBALLIANCE                                                              | CNR Virus des Infections Respiratoires - France SUD                                                                | Antonin Bal; Bruno Lina; Gregory Destras; Gwendolynne Burfin; Hadrien Regue; Laurence Josset; Martine Valette; Quentin Semanas                                                                                                                                                                                                                                                                                                                                                                                                                                                                                              |
| EPI_ISL_4320896                                                                                                                                                                           | LAM EIMER LENYS                                                               | CNR Virus des Infections Respiratoires - France SUD                                                                | Antonin Bal; Bruno Lina; Gregory Destras; Gwendolynne Burfin; Hadrien Regue; Laurence Josset; Martine Valette; Quentin Semanas                                                                                                                                                                                                                                                                                                                                                                                                                                                                                              |
| EPI_ISL_4606564                                                                                                                                                                           | LAM GEN-BIO GRAVANCHES                                                        | CNR Virus des Infections Respiratoires - France SUD                                                                | Antonin Bal; Bruno Lina; Gregory Destras; Gwendolynne Burfin; Hadrien Regue; Laurence Josset; Martine Valette; Quentin Semanas                                                                                                                                                                                                                                                                                                                                                                                                                                                                                              |
| EPI_ISL_3246154,<br>EPI_ISL_5249901                                                                                                                                                       | LATE - Laboratório de Técnicas Especiais - Hospital Israelita Albert Einstein | LATE - Laboratório de Técnicas Especiais - Hospital Israelita Albert Einstein                                      | Alexandre Hideaki Takara; Ana Paula Moreira Sales; Anelise da Silva Santos; Devidy Amgarten; Erick Gustavo Dorlans; Fernanda de Mello Malta; João Renato Rebello Pinho; Marcio Anunciacao Menezes; Pedro Henrique Sebe Rodrigues; Raquel Riyuzo                                                                                                                                                                                                                                                                                                                                                                             |
| EPI_ISL_5313714                                                                                                                                                                           | LBM SEALAB DARRASSE ET ASSOCIES                                               | CNR Virus des Infections Respiratoires - France SUD                                                                | Antonin Bal; Bruno Lina; Gregory Destras; Gwendolynne Burfin; Hadrien Regue; Laurence Josset; Martine Valette; Quentin Semanas                                                                                                                                                                                                                                                                                                                                                                                                                                                                                              |
| EPI_ISL_8747748                                                                                                                                                                           | LESP Chihuahua                                                                | Instituto de Diagnostico y Referencia Epidemiologicos (INDRE)                                                      | Abril Rodriguez-Maldonado; Ariadna Medina-Benitez; Claudia Wong-Arambula; Ernesto Ramirez-Gonzalez.; Fernando Gonzalez-Dominguez; Gisela Barrera-Badillo; Irma Lopez-Martinez; Joaquin Quiroz-Mercado; Lucia Hernandez-Rivas; Maribel Gonzalez-Villa; Natividad Cruz-Ortiz; Sergio Rangel-Guerrero; Tatiana Nunez-Garcia; Vanessa Rivero-Arredondo                                                                                                                                                                                                                                                                          |
| EPI_ISL_1821188                                                                                                                                                                           | LESP Ciudad de Mexico                                                         | Instituto de Diagnostico y Referencia Epidemiologicos (INDRE)                                                      | Abril Rodriguez-Maldonado; Ariadna Medina-Benitez; Claudia Wong-Arambula; Ernesto Ramirez-Gonzalez.; Gisela Barrera-Badillo; Irma Lopez-Martinez; Joaquin Quiroz-Mercado; Lucia Hernandez-Rivas; Natividad Cruz-Ortiz; Sergio Rangel-Guerrero; Tatiana Nunez-Garcia; Vanessa Rivero-Arredondo                                                                                                                                                                                                                                                                                                                               |
| EPI_ISL_3769094                                                                                                                                                                           | LESP Guerrero                                                                 | Instituto de Diagnostico y Referencia Epidemiologicos (INDRE)                                                      | Abril Rodriguez-Maldonado; Ariadna Medina-Benitez; Claudia Wong-Arambula; Ernesto Ramirez-Gonzalez.; Gisela Barrera-Badillo; Irma Lopez-Martinez; Joaquin Quiroz-Mercado; Lucia Hernandez-Rivas; Maribel Gonzalez-Villa; Natividad Cruz-Ortiz; Sergio Rangel-Guerrero; Tatiana Nunez-Garcia; Vanessa Rivero-Arredondo                                                                                                                                                                                                                                                                                                       |
| EPI_ISL_4299014                                                                                                                                                                           | LESP Jalisco                                                                  | Instituto de Diagnostico y Referencia Epidemiologicos (INDRE)                                                      | Abril Rodriguez-Maldonado; Ariadna Medina-Benitez; Claudia Wong-Arambula; Ernesto Ramirez-Gonzalez.; Gisela Barrera-Badillo; Irma Lopez-Martinez; Joaquin Quiroz-Mercado; Lucia Hernandez-Rivas; Maribel Gonzalez-Villa; Natividad Cruz-Ortiz; Sergio Rangel-Guerrero; Tatiana Nunez-Garcia; Vanessa Rivero-Arredondo                                                                                                                                                                                                                                                                                                       |
| EPI_ISL_2158161                                                                                                                                                                           | LESP Morelos                                                                  | Instituto de Diagnostico y Referencia Epidemiologicos (INDRE)                                                      | Abril Rodriguez-Maldonado; Ariadna Medina-Benitez; Claudia Wong-Arambula; Ernesto Ramirez-Gonzalez.; Gisela Barrera-Badillo; Irma Lopez-Martinez; Joaquin Quiroz-Mercado; Lucia Hernandez-Rivas; Natividad Cruz-Ortiz; Sergio Rangel-Guerrero; Tatiana Nunez-Garcia; Vanessa Rivero-Arredondo                                                                                                                                                                                                                                                                                                                               |
| EPI_ISL_6810271                                                                                                                                                                           | LESP Nuevo Leon                                                               | Instituto de Diagnostico y Referencia Epidemiologicos (INDRE)                                                      | Abril Rodriguez-Maldonado; Ariadna Medina-Benitez; Claudia Wong-Arambula; Ernesto Ramirez-Gonzalez.; Fernando Gonzalez-Dominguez; Gisela Barrera-Badillo; Irma Lopez-Martinez; Joaquin Quiroz-Mercado; Lucia Hernandez-Rivas; Maribel Gonzalez-Villa; Natividad Cruz-Ortiz; Tatiana Nunez-Garcia; Vanessa Rivero-Arredondo                                                                                                                                                                                                                                                                                                  |
| EPI_ISL_2158236,<br>EPI_ISL_2492498,<br>EPI_ISL_5686819                                                                                                                                   | LESP Queretaro                                                                | Instituto de Diagnostico y Referencia Epidemiologicos (INDRE)                                                      | Abril Rodriguez-Maldonado; Ariadna Medina-Benitez; Claudia Wong-Arambula; Ernesto Ramirez-Gonzalez.; Fernando Gonzalez-Dominguez; Gisela Barrera-Badillo; Irma Lopez-Martinez; Joaquin Quiroz-Mercado; Lucia Hernandez-Rivas; Maribel Gonzalez-Villa; Natividad Cruz-Ortiz; Sergio Rangel-Guerrero; Tatiana Nunez-Garcia; Vanessa Rivero-Arredondo                                                                                                                                                                                                                                                                          |
| EPI_ISL_2859104,<br>EPI_ISL_3033358,<br>EPI_ISL_4298788                                                                                                                                   | LESP Tabasco                                                                  | Instituto de Diagnostico y Referencia Epidemiologicos (INDRE)                                                      | Abril Rodriguez-Maldonado; Ariadna Medina-Benitez; Claudia Wong-Arambula; Ernesto Ramirez-Gonzalez.; Gisela Barrera-Badillo; Irma Lopez-Martinez; Joaquin Quiroz-Mercado; Lucia Hernandez-Rivas; Maribel Gonzalez-Villa; Natividad Cruz-Ortiz; Sergio Rangel-Guerrero; Tatiana Nunez-Garcia; Vanessa Rivero-Arredondo                                                                                                                                                                                                                                                                                                       |

|                                                                                                                                                                                                                                                                                                                                                                                                                                                                                                                              |                                                                                                             |                                                                                                                                                                                                                                  |                                                                                                                                                                                                                                                                                                                                                                                                                                                                                                                                                                                                                                                                                                                                                                                                                                                                                                             |
|------------------------------------------------------------------------------------------------------------------------------------------------------------------------------------------------------------------------------------------------------------------------------------------------------------------------------------------------------------------------------------------------------------------------------------------------------------------------------------------------------------------------------|-------------------------------------------------------------------------------------------------------------|----------------------------------------------------------------------------------------------------------------------------------------------------------------------------------------------------------------------------------|-------------------------------------------------------------------------------------------------------------------------------------------------------------------------------------------------------------------------------------------------------------------------------------------------------------------------------------------------------------------------------------------------------------------------------------------------------------------------------------------------------------------------------------------------------------------------------------------------------------------------------------------------------------------------------------------------------------------------------------------------------------------------------------------------------------------------------------------------------------------------------------------------------------|
| EPI_ISL_3460010                                                                                                                                                                                                                                                                                                                                                                                                                                                                                                              | LESP Veracruz                                                                                               | Instituto de Diagnostico y Referencia Epidemiologicos (INDRE)                                                                                                                                                                    | Abril Rodriguez-Maldonado; Ariadna Medina-Benitez; Claudia Wong-Arambula; Ernesto Ramirez-Gonzalez.; Gisela Barrera-Badillo; Irma Lopez-Martinez; Joaquin Quiroz-Mercado; Lucia Hernandez-Rivas; Maribel Gonzalez-Villa; Natividad Cruz-Ortiz; Sergio Rangel-Guerrero; Tatiana Nunez-Garcia; Vanessa Rivero-Arredondo                                                                                                                                                                                                                                                                                                                                                                                                                                                                                                                                                                                       |
| EPI_ISL_2340933, EPI_ISL_5687017                                                                                                                                                                                                                                                                                                                                                                                                                                                                                             | LESP Yucatan                                                                                                | Instituto de Diagnostico y Referencia Epidemiologicos (INDRE)                                                                                                                                                                    | Abril Rodriguez-Maldonado; Ariadna Medina-Benitez; Claudia Wong-Arambula; Ernesto Ramirez-Gonzalez.; Fernando Gonzalez-Dominguez; Gisela Barrera-Badillo; Irma Lopez-Martinez; Joaquin Quiroz-Mercado; Lucia Hernandez-Rivas; Maribel Gonzalez-Villa; Natividad Cruz-Ortiz; Sergio Rangel-Guerrero; Tatiana Nunez-Garcia; Vanessa Rivero-Arredondo                                                                                                                                                                                                                                                                                                                                                                                                                                                                                                                                                          |
| EPI_ISL_1935154                                                                                                                                                                                                                                                                                                                                                                                                                                                                                                              | LIV VILLEFRANCHE                                                                                            | CNR Virus des Infections Respiratoires - France SUD                                                                                                                                                                              | Antonin Bal; Bruno Lina; Bruno Simon; Gregory Destras; Gwendolynne Burfin; Hadrien Regue; Laurence Josset; Martine Valette; Quentin Semanas                                                                                                                                                                                                                                                                                                                                                                                                                                                                                                                                                                                                                                                                                                                                                                 |
| EPI_ISL_2142670                                                                                                                                                                                                                                                                                                                                                                                                                                                                                                              | LMS REUNILAB                                                                                                | CNR Virus des Infections Respiratoires - France SUD                                                                                                                                                                              | Antonin Bal; Bruno Lina; Bruno Simon; Gregory Destras; Gwendolynne Burfin; Hadrien Regue; Laurence Josset; Martine Valette; Quentin Semanas                                                                                                                                                                                                                                                                                                                                                                                                                                                                                                                                                                                                                                                                                                                                                                 |
| EPI_ISL_7449565                                                                                                                                                                                                                                                                                                                                                                                                                                                                                                              | LNS                                                                                                         | Incienza, Instituto Costarricense de Investigación y Enseñanza en Nutrición y Salud                                                                                                                                              | Claudia Estrada; César Conde; Laboratorio de Genómica INCIENSA; Selene González                                                                                                                                                                                                                                                                                                                                                                                                                                                                                                                                                                                                                                                                                                                                                                                                                             |
| EPI_ISL_4214141                                                                                                                                                                                                                                                                                                                                                                                                                                                                                                              | LSUHS Emerging Viral Threat Lab                                                                             | LSUHS Emerging Viral Threat Laboratory                                                                                                                                                                                           | Alexander Mijalis; Andrew D. Yurochko; Christopher G. Kevill; Gregory L. Ware; Jennifer L. Carroll; Jeremy P. Kamil; John A. Vanchiere; Maarten Van Diest; Rona S. Scott                                                                                                                                                                                                                                                                                                                                                                                                                                                                                                                                                                                                                                                                                                                                    |
| EPI_ISL_653425, EPI_ISL_768506, EPI_ISL_889766, EPI_ISL_1039557, EPI_ISL_1324163                                                                                                                                                                                                                                                                                                                                                                                                                                             | LSUHS Emerging Viral Threat Laboratory                                                                      | Microbial Genome Sequencing Center                                                                                                                                                                                               | Andrew D. Yurochko; Camille F. Abshire; Christopher G. Kevill; Daniel J. Snyder; Jennifer L. Carroll; Jeremy P. Kamil; John A. Vanchiere; Katarzyna Zwolinska; Maarten Van Diest; Malgorzata Bienkowska-Haba; Martin J. Sapp; Mohammed N.A. Siddiquey; Rona S. Scott; Vaughn S. Cooper                                                                                                                                                                                                                                                                                                                                                                                                                                                                                                                                                                                                                      |
| EPI_ISL_7205874                                                                                                                                                                                                                                                                                                                                                                                                                                                                                                              | LX BIO                                                                                                      | CNR Virus des Infections Respiratoires - France SUD                                                                                                                                                                              | Antonin Bal; Bruno Lina; Bruno Simon; Gregory Destras; Gwendolynne Burfin; Hadrien Regue; Laurence Josset; Martine Valette; Quentin Semanas                                                                                                                                                                                                                                                                                                                                                                                                                                                                                                                                                                                                                                                                                                                                                                 |
| EPI_ISL_2192029, EPI_ISL_3867951, EPI_ISL_3868178, EPI_ISL_4805216, EPI_ISL_5432630, EPI_ISL_5433113, EPI_ISL_5433200, EPI_ISL_5433407                                                                                                                                                                                                                                                                                                                                                                                       | see above                                                                                                   | Lab voor klinische biologie                                                                                                                                                                                                      | Bruno Verhasselt; Hannelore Hamerlinck; Marija Janevska; May-Linh Truong                                                                                                                                                                                                                                                                                                                                                                                                                                                                                                                                                                                                                                                                                                                                                                                                                                    |
| EPI_ISL_6121025                                                                                                                                                                                                                                                                                                                                                                                                                                                                                                              | Lab. Comfandi                                                                                               | Laboratorio de biotecnología, Universidad Icesi                                                                                                                                                                                  | Adrián Camilo Rodríguez Ararat; Diana M. Florez Giraldo; Marcela Mercado; María F. Villegas Torres; María I. Gutiérrez López; Paola A. Caicedo Burbano; Programa Nacional de Caracterización Genómica de SARS-CoV-2; Sara González Henao                                                                                                                                                                                                                                                                                                                                                                                                                                                                                                                                                                                                                                                                    |
| EPI_ISL_4525868, EPI_ISL_6229501, EPI_ISL_6607629, EPI_ISL_6607697, EPI_ISL_7592748, EPI_ISL_9439507                                                                                                                                                                                                                                                                                                                                                                                                                         | Lab. Microbiologia e Virologia Cotugno A.O. dei Colli                                                       | TIGEM                                                                                                                                                                                                                            | Antonio Grimaldi Patrizia Annunziata Francesco Panariello Claudia Tiberio Teresa Giuliano Valentina Bouche Chiara Colantuono Lucio Di Filippo Anna Manfredi Marcello Salvi Antonio Limone Luigi Atripaldi Andrea Ballabio Davide Cacchiarelli; Antonio Grimaldi Patrizia Annunziata Francesco Panariello Claudia Tiberio Teresa Giuliano Valentina Bouche Chiara Colantuono Lucio Di Filippo Ornella Leone Anna Manfredi Marcello Salvi Antonio Limone Luigi Atripaldi Andrea Ballabio Davide Cacchiarelli                                                                                                                                                                                                                                                                                                                                                                                                  |
| EPI_ISL_3824097                                                                                                                                                                                                                                                                                                                                                                                                                                                                                                              | Lab. Mikrobiologiczne                                                                                       | Wojewódzka Stacja Sanitarno-Epidemiologiczna w Katowicach                                                                                                                                                                        | Beata Rozwadowska                                                                                                                                                                                                                                                                                                                                                                                                                                                                                                                                                                                                                                                                                                                                                                                                                                                                                           |
| EPI_ISL_5193824                                                                                                                                                                                                                                                                                                                                                                                                                                                                                                              | LabIN, Institut laboratorni mediciny                                                                        | State Veterinary Institute Prague                                                                                                                                                                                                | Alexander Nagy; Helena Jirincova; Jaromira Vecerova; Lenka Cernikova; Martina Stara; Timotej Suri                                                                                                                                                                                                                                                                                                                                                                                                                                                                                                                                                                                                                                                                                                                                                                                                           |
| EPI_ISL_1436031, EPI_ISL_1638748, EPI_ISL_2388408, EPI_ISL_3888603, EPI_ISL_4438990, EPI_ISL_5904108, EPI_ISL_6196282                                                                                                                                                                                                                                                                                                                                                                                                        | see above                                                                                                   | LabKom - Labor Augsburg MVZ GmbH                                                                                                                                                                                                 | Robert Koch Institute                                                                                                                                                                                                                                                                                                                                                                                                                                                                                                                                                                                                                                                                                                                                                                                                                                                                                       |
| EPI_ISL_8236886                                                                                                                                                                                                                                                                                                                                                                                                                                                                                                              | LabKom - Labor Mainz MVZ GmbH                                                                               | Robert Koch Institute                                                                                                                                                                                                            | Robert Koch Institute                                                                                                                                                                                                                                                                                                                                                                                                                                                                                                                                                                                                                                                                                                                                                                                                                                                                                       |
| EPI_ISL_2109242                                                                                                                                                                                                                                                                                                                                                                                                                                                                                                              | LabKom - Labor an der Salzbrücke MVZ GmbH                                                                   | Robert Koch Institute                                                                                                                                                                                                            | Robert Koch Institute                                                                                                                                                                                                                                                                                                                                                                                                                                                                                                                                                                                                                                                                                                                                                                                                                                                                                       |
| EPI_ISL_1642546                                                                                                                                                                                                                                                                                                                                                                                                                                                                                                              | LabKom - Labor an der Salzbrücke MVZ GmbH                                                                   | Robert Koch Institute                                                                                                                                                                                                            | Robert Koch Institute                                                                                                                                                                                                                                                                                                                                                                                                                                                                                                                                                                                                                                                                                                                                                                                                                                                                                       |
| EPI_ISL_4614953, EPI_ISL_5911871, EPI_ISL_8669979                                                                                                                                                                                                                                                                                                                                                                                                                                                                            | LabKom - MVZ Labor Bochum MLB GmbH                                                                          | Robert Koch Institute                                                                                                                                                                                                            | Robert Koch Institute                                                                                                                                                                                                                                                                                                                                                                                                                                                                                                                                                                                                                                                                                                                                                                                                                                                                                       |
| EPI_ISL_887738, EPI_ISL_888123, EPI_ISL_938165, EPI_ISL_888351                                                                                                                                                                                                                                                                                                                                                                                                                                                               | Labcorp                                                                                                     | Genomics and Discovery, Respiratory Viruses Branch, Division of Viral Diseases, Centers for Disease Control and Prevention                                                                                                       | ; Amanda Douglas; Amanda Suchanek; Andrea Throop; Ayla Burns; Ben L. Rambo-Martin; Bobbi Croy; Brian Krueger; Brian Norvell; Christos Petropoulos; Clinton R. Paden; Craig Lukasik; Debbie Boles; Dhvani Batra; Duncan MacCannell; Eyad Almasri; Goran Stevovic; Howard Engler; Hrushikesh Deshmukh; Jake Humphrey; Jana Schroth; Joe Voshell; John Pruitt; Jonathan Meltzer; Jonathan Williams; Kimberly Wagner; Lax Iyer; Lyndon Tilson; Manoj Jain; Marcia Eisenberg; Mary Ann Cristobal; Mary Williamson; Michael Levandoski; Mike Sapeta; Mindy Nye; Minoo Agarwal; Mohan Kollu; Nuthawin Charoensri; Oren Cohen; Peter W. Cook; Prashant Gupta; Qian Zeng; Rama Ghattl; Scott Parker; Scott Ryan; Stanley Letovsky; Steven Ragan; Summer Galloway; Suresh Babu Selvaraju; Susan Countryman; Susan Hicks; Suxiang Tong; Suzanne Dale; Thomas Urban; Tim Kuphal; Tricia Zwiefelhofer; Vincent Drouillon |
| EPI_ISL_1301862, EPI_ISL_2029845, EPI_ISL_2835724, EPI_ISL_2923124, EPI_ISL_3219735, EPI_ISL_3355688, EPI_ISL_3506704, EPI_ISL_3690239, EPI_ISL_3690415, EPI_ISL_3801716, EPI_ISL_3804419, EPI_ISL_4411276, EPI_ISL_4461432, EPI_ISL_4600915, EPI_ISL_4879075, EPI_ISL_4951169, EPI_ISL_5306596, EPI_ISL_5332265, EPI_ISL_6886991, EPI_ISL_7218050, EPI_ISL_7789313, EPI_ISL_7890337, EPI_ISL_8316698, EPI_ISL_8416985, EPI_ISL_8417023, EPI_ISL_8546579, EPI_ISL_8789512, EPI_ISL_8926223, EPI_ISL_9087412, EPI_ISL_9089779 | see above                                                                                                   | National Reference Center for Viruses of Respiratory Infections, Institut Pasteur, Paris                                                                                                                                         | ARNAUD SERPENTINI; Angela Brisebarre; Anne CADY; Anne-Claire STRZELECKI; Arditi Cocco; Aude LESENNE; Briec GESTIN; Briec Gestin; Bénédicte Roquebert; COCCO S.; Camille Capel; Carine Lecorre; Caroline Malderet; Chauvet; Christine FREVILLE; Christophe Malabat; Claire FELLONI; Corinne Mautrais; Damien Mornico; Eric Morin; Etienne Simon-Lorière; F. Kerdavid; François-Xavier Le Guillou; François NESTOUR; Frédéric Lemoine; Guillaume Aubin; Hub de Bioinformatique et Biostatistique; Jean-François Comes; Julien Fumey; Karine Michez; LABORATOIRE Palissy; Louise Lefrançois; MIAIRA Philippe; Marion Barbet; Maud Vanpeene; Méline Bizard; Nabila Belhouachi; Ophélie Said-Delatre; Philippe Girard; Slim El Khiani; Slim El-Khiani; Sylvie Behillil; Sylvie Van der Werf; Sylvie van der Werf; Vincent Enouf                                                                                  |
| EPI_ISL_1697346                                                                                                                                                                                                                                                                                                                                                                                                                                                                                                              | Labo Klinische Biologie, UZA                                                                                | Labo Klinische Biologie, UZA                                                                                                                                                                                                     | Basil Britto Xavier; Christine Lammens; Herman Goossens; Jasmine Coppens; Marie Le Mercier; Veerle Matheussens                                                                                                                                                                                                                                                                                                                                                                                                                                                                                                                                                                                                                                                                                                                                                                                              |
| EPI_ISL_1908407                                                                                                                                                                                                                                                                                                                                                                                                                                                                                                              | Laboratorium Biologi Molekularnej UK                                                                        | 156. National Institute of Public Health - National Institute of Hygiene, Warsaw, Poland 2. Biobank Lab, University of Lodz 3. Laboratory of Respiratory Viruses, Teaching and Clinical Center of the Medical University of Lodz | Dominik Strapagiel; Izabela Drózdź; Jakub Lach; Katarzyna Zacharczuk; Klaudyna Królikowska; Maciej Borowiec; Magdalena Nowakowska; Magdalena Traczyk-Borszyska; Marcin Słomka; Marta Sobalska-Kwapis; Malgorzata Sadkowska-Todys; Tomasz Ploszaj; Tomasz Wolkowicz                                                                                                                                                                                                                                                                                                                                                                                                                                                                                                                                                                                                                                          |
| EPI_ISL_4227571                                                                                                                                                                                                                                                                                                                                                                                                                                                                                                              | Labor 28 MVZ GmbH                                                                                           | Robert Koch Institute                                                                                                                                                                                                            | Robert Koch Institute                                                                                                                                                                                                                                                                                                                                                                                                                                                                                                                                                                                                                                                                                                                                                                                                                                                                                       |
| EPI_ISL_2124008                                                                                                                                                                                                                                                                                                                                                                                                                                                                                                              | Labor Becker & Kollegen (Standort Munchen)                                                                  | Robert Koch Institute                                                                                                                                                                                                            | Robert Koch Institute                                                                                                                                                                                                                                                                                                                                                                                                                                                                                                                                                                                                                                                                                                                                                                                                                                                                                       |
| EPI_ISL_2261322, EPI_ISL_6954032, EPI_ISL_6954047, EPI_ISL_6954200, EPI_ISL_8216713                                                                                                                                                                                                                                                                                                                                                                                                                                          | Labor Blackholm MVZ                                                                                         | Robert Koch Institute                                                                                                                                                                                                            | Robert Koch Institute                                                                                                                                                                                                                                                                                                                                                                                                                                                                                                                                                                                                                                                                                                                                                                                                                                                                                       |
| EPI_ISL_1716025, EPI_ISL_2385005, EPI_ISL_2689216, EPI_ISL_4938255, EPI_ISL_4939084, EPI_ISL_7163572, EPI_ISL_8694121                                                                                                                                                                                                                                                                                                                                                                                                        | see above                                                                                                   | Labor Dr. Fenner und Kollegen                                                                                                                                                                                                    | Heinrich Pette Institute, Leibniz Institute for Experimental Virology                                                                                                                                                                                                                                                                                                                                                                                                                                                                                                                                                                                                                                                                                                                                                                                                                                       |
| EPI_ISL_5906627                                                                                                                                                                                                                                                                                                                                                                                                                                                                                                              | Labor Dr. Heidrich & Kollegen MVZ GmbH Hamburg                                                              | Robert Koch Institute                                                                                                                                                                                                            | Robert Koch Institute                                                                                                                                                                                                                                                                                                                                                                                                                                                                                                                                                                                                                                                                                                                                                                                                                                                                                       |
| EPI_ISL_1353489                                                                                                                                                                                                                                                                                                                                                                                                                                                                                                              | Labor Dr. Spranger                                                                                          | Robert Koch Institute                                                                                                                                                                                                            | Robert Koch Institute                                                                                                                                                                                                                                                                                                                                                                                                                                                                                                                                                                                                                                                                                                                                                                                                                                                                                       |
| EPI_ISL_3711824, EPI_ISL_4230902, EPI_ISL_4444557, EPI_ISL_5397067, EPI_ISL_5400588, EPI_ISL_7749863, EPI_ISL_7749952                                                                                                                                                                                                                                                                                                                                                                                                        | see above                                                                                                   | Labor Dr. Wisplinghoff - Köln                                                                                                                                                                                                    | Robert Koch Institute                                                                                                                                                                                                                                                                                                                                                                                                                                                                                                                                                                                                                                                                                                                                                                                                                                                                                       |
| EPI_ISL_3888220                                                                                                                                                                                                                                                                                                                                                                                                                                                                                                              | Labor Lübeck bzw. Laborärztliche Gemeinschaftspraxis Lübeck                                                 | Robert Koch Institute                                                                                                                                                                                                            | Robert Koch Institute                                                                                                                                                                                                                                                                                                                                                                                                                                                                                                                                                                                                                                                                                                                                                                                                                                                                                       |
| EPI_ISL_1643790, EPI_ISL_1643791                                                                                                                                                                                                                                                                                                                                                                                                                                                                                             | Labor MÄnchenladbach MVZ Dr. Stein + Kollegen GbR                                                           | Robert Koch Institute                                                                                                                                                                                                            | Robert Koch Institute                                                                                                                                                                                                                                                                                                                                                                                                                                                                                                                                                                                                                                                                                                                                                                                                                                                                                       |
| EPI_ISL_2845170, EPI_ISL_4038665, EPI_ISL_4039324, EPI_ISL_6462594, EPI_ISL_6956305, EPI_ISL_8680715, EPI_ISL_9053181                                                                                                                                                                                                                                                                                                                                                                                                        | see above                                                                                                   | Labor Mönchengladbach MVZ Dr. Stein + Kollegen GbR                                                                                                                                                                               | Robert Koch Institute                                                                                                                                                                                                                                                                                                                                                                                                                                                                                                                                                                                                                                                                                                                                                                                                                                                                                       |
| EPI_ISL_2111574                                                                                                                                                                                                                                                                                                                                                                                                                                                                                                              | Labor ZOTZ/KLIMAS; MVZ Dusseldorf-Centrum                                                                   | Robert Koch Institute                                                                                                                                                                                                            | Robert Koch Institute                                                                                                                                                                                                                                                                                                                                                                                                                                                                                                                                                                                                                                                                                                                                                                                                                                                                                       |
| EPI_ISL_2386783                                                                                                                                                                                                                                                                                                                                                                                                                                                                                                              | Labor ZOTZ/KLIMAS; MVZ Dusseldorf-Centrum                                                                   | Robert Koch Institute                                                                                                                                                                                                            | Robert Koch Institute                                                                                                                                                                                                                                                                                                                                                                                                                                                                                                                                                                                                                                                                                                                                                                                                                                                                                       |
| EPI_ISL_1567298                                                                                                                                                                                                                                                                                                                                                                                                                                                                                                              | Labor fÄr medizinische Mikrobiologie Bakteriologie Mykologie Virologie & Infektionserologie - Labor MÄnchen | Robert Koch Institute                                                                                                                                                                                                            | Robert Koch Institute                                                                                                                                                                                                                                                                                                                                                                                                                                                                                                                                                                                                                                                                                                                                                                                                                                                                                       |
| EPI_ISL_2632059, EPI_ISL_6459144                                                                                                                                                                                                                                                                                                                                                                                                                                                                                             | Laborarztpraxis Osnabrück                                                                                   | Robert Koch Institute                                                                                                                                                                                                            | Robert Koch Institute                                                                                                                                                                                                                                                                                                                                                                                                                                                                                                                                                                                                                                                                                                                                                                                                                                                                                       |
| EPI_ISL_1508989                                                                                                                                                                                                                                                                                                                                                                                                                                                                                                              | Laboratoire Biolim/FSS/JUL                                                                                  | Unité Mixte Internationale TransVIHMI (UMI 233 IRD - U1175 INSERM - Université de Montpellier) IRD (Institut de recherche pour le développement)                                                                                 | Abla A. KONOU; Adodo SADJI; Ahidjo AYOUBA; Akoélé SILIADIN; Alassane OURO-MEDEL; Amivi EHLAN; Améyo DORKENOO; Anoumou DAGNRA; Christelle BUTEL; Déléma MABA; Eric DELAPORTE; Issaka Maman; Kokou TEGUENI; Koku AGBODEKA; Laetitia SERRANO; Martine PEETERS; Messanh DOUFFAN; Mireille PRINCE-DAVID; Mounerou SALOU; Sidonie A.M.KAGNISSODE; Sika DOSSIM; Syntyche DEVATCHAGNI; Wembo A. HALATOKO                                                                                                                                                                                                                                                                                                                                                                                                                                                                                                            |
| EPI_ISL_2464425                                                                                                                                                                                                                                                                                                                                                                                                                                                                                                              | Laboratoire Bonheure                                                                                        | Department of Virology, Henri Mondor University Hospital, Assistance Publique Hôpitaux de Paris, Université Paris-Est Créteil, INSERM U955                                                                                       | Alexandre Soulier; Christophe Rodriguez; Elisabeth Trawinski; Guillaume Gricourt; Jean-Michel Pawlowsky; Melissa N'Debi; Slim Fourati; Vanessa Demontant                                                                                                                                                                                                                                                                                                                                                                                                                                                                                                                                                                                                                                                                                                                                                    |
| EPI_ISL_5749063                                                                                                                                                                                                                                                                                                                                                                                                                                                                                                              | Laboratoire CLEMENT                                                                                         | Department of Virology, Henri Mondor University Hospital, Assistance Publique Hôpitaux de Paris, Université Paris-Est Créteil, INSERM U955                                                                                       | Alexandre Soulier; Christophe Rodriguez; Elisabeth Trawinski; Guillaume Gricourt; Jean-Michel Pawlowsky; Melissa N'Debi; Slim Fourati; Vanessa Demontant                                                                                                                                                                                                                                                                                                                                                                                                                                                                                                                                                                                                                                                                                                                                                    |
| EPI_ISL_6701094                                                                                                                                                                                                                                                                                                                                                                                                                                                                                                              | Laboratoire ESPACEBIO                                                                                       | Department of Virology, Henri Mondor University Hospital, Assistance Publique Hôpitaux de Paris, Université Paris-Est Créteil, INSERM U955                                                                                       | Alexandre Soulier; Christophe Rodriguez; Elisabeth Trawinski; Guillaume Gricourt; Jean-Michel Pawlowsky; Melissa N'Debi; Slim Fourati; Vanessa Demontant                                                                                                                                                                                                                                                                                                                                                                                                                                                                                                                                                                                                                                                                                                                                                    |
| EPI_ISL_8298457                                                                                                                                                                                                                                                                                                                                                                                                                                                                                                              | Laboratoire de Virologie Clinique, Institut Pasteur de Tunis                                                | Laboratory of Clinical Virology, Institut Pasteur de Tunis                                                                                                                                                                       | Chouikha Anissa; Nissaf Ben Alaya; Triki Henda                                                                                                                                                                                                                                                                                                                                                                                                                                                                                                                                                                                                                                                                                                                                                                                                                                                              |

|                                                                                                                                                                                                                                                                                                                                                                                                                                                                                                                                                                                                               |                                                                                                                                                   |                                                                                                                                                                                                                                                                                                                           |                                                                                                                                                                                                                                                                                                                                                                                                                                                                                                                                                                                                                                                                                                                                                                                                                                                                                                                                                                                                                                                                                                                                                                                                                                                                                                                                                                                                                                                                                                                                                                                                                                                                                                                                                           |
|---------------------------------------------------------------------------------------------------------------------------------------------------------------------------------------------------------------------------------------------------------------------------------------------------------------------------------------------------------------------------------------------------------------------------------------------------------------------------------------------------------------------------------------------------------------------------------------------------------------|---------------------------------------------------------------------------------------------------------------------------------------------------|---------------------------------------------------------------------------------------------------------------------------------------------------------------------------------------------------------------------------------------------------------------------------------------------------------------------------|-----------------------------------------------------------------------------------------------------------------------------------------------------------------------------------------------------------------------------------------------------------------------------------------------------------------------------------------------------------------------------------------------------------------------------------------------------------------------------------------------------------------------------------------------------------------------------------------------------------------------------------------------------------------------------------------------------------------------------------------------------------------------------------------------------------------------------------------------------------------------------------------------------------------------------------------------------------------------------------------------------------------------------------------------------------------------------------------------------------------------------------------------------------------------------------------------------------------------------------------------------------------------------------------------------------------------------------------------------------------------------------------------------------------------------------------------------------------------------------------------------------------------------------------------------------------------------------------------------------------------------------------------------------------------------------------------------------------------------------------------------------|
| EPI_ISL_5135401                                                                                                                                                                                                                                                                                                                                                                                                                                                                                                                                                                                               | Laboratoire de Virologie - CHU François Mitterrand - Dijon - France                                                                               | INSERM U1231 - Equipe GAD                                                                                                                                                                                                                                                                                                 | Ali SI-MOHAMMED; Hélène GIRAUDON; Lionel PIROTH; Yannis DUFFOURD                                                                                                                                                                                                                                                                                                                                                                                                                                                                                                                                                                                                                                                                                                                                                                                                                                                                                                                                                                                                                                                                                                                                                                                                                                                                                                                                                                                                                                                                                                                                                                                                                                                                                          |
| EPI_ISL_826205, EPI_ISL_852835, EPI_ISL_889826, EPI_ISL_954605, EPI_ISL_1241005, EPI_ISL_1366005, EPI_ISL_1366011, EPI_ISL_1390922, EPI_ISL_1403108, EPI_ISL_1696885, EPI_ISL_2294099, EPI_ISL_2388262, EPI_ISL_2390822, EPI_ISL_2822113, EPI_ISL_2823665, EPI_ISL_2975377, EPI_ISL_3143212, EPI_ISL_3143213, EPI_ISL_3143612, EPI_ISL_3143641, EPI_ISL_3144176, EPI_ISL_3508699, EPI_ISL_4999238, EPI_ISL_5872478, EPI_ISL_5897394, EPI_ISL_5897997, EPI_ISL_6423899, EPI_ISL_7651813, EPI_ISL_7652216, EPI_ISL_7653009, EPI_ISL_7690167, EPI_ISL_7690549, EPI_ISL_7690689, EPI_ISL_7690711, EPI_ISL_7704700 | Laboratoire de santé publique du Québec                                                                                                           | Guillaume Bourque; Ioannis Ragoussis; Jesse Shapiro; Mark Lathrop and Judith Fafard on behalf of the CoVSeQ research group; Mark Lathrop and Michel Roger on behalf of the CoVSeQ research group; Mark Lathrop and Michel Roger on behalf of the CoVSeQ research group (http://covseq.ca/researchgroup); Sandrine Moreira |                                                                                                                                                                                                                                                                                                                                                                                                                                                                                                                                                                                                                                                                                                                                                                                                                                                                                                                                                                                                                                                                                                                                                                                                                                                                                                                                                                                                                                                                                                                                                                                                                                                                                                                                                           |
| see above                                                                                                                                                                                                                                                                                                                                                                                                                                                                                                                                                                                                     | Laboratoire de santé publique du Québec                                                                                                           | Laboratoire de santé publique du Québec                                                                                                                                                                                                                                                                                   |                                                                                                                                                                                                                                                                                                                                                                                                                                                                                                                                                                                                                                                                                                                                                                                                                                                                                                                                                                                                                                                                                                                                                                                                                                                                                                                                                                                                                                                                                                                                                                                                                                                                                                                                                           |
| EPI_ISL_910649, EPI_ISL_910657, EPI_ISL_1523099, EPI_ISL_1918088, EPI_ISL_7791134                                                                                                                                                                                                                                                                                                                                                                                                                                                                                                                             | Laboratoire national de sante, Microbiology, Virology                                                                                             | Laboratoire national de sante, Microbiology, Microbial Genomics Platform                                                                                                                                                                                                                                                  | Anke Wienecke-Baldacchino; Catherine Ragimbeau; Elodie Solarino; Fatu Djabi; Jessica Tapp; Lise Pignon; Raoul Salmon; Sibel Berger; Tamir Abdelrahman; Trung Nguyen Nguyen; Virginie Jover                                                                                                                                                                                                                                                                                                                                                                                                                                                                                                                                                                                                                                                                                                                                                                                                                                                                                                                                                                                                                                                                                                                                                                                                                                                                                                                                                                                                                                                                                                                                                                |
| EPI_ISL_740366                                                                                                                                                                                                                                                                                                                                                                                                                                                                                                                                                                                                | Laboratoire national de santé, Microbiology, Virology                                                                                             | Laboratoire national de santé, Microbiology, Microbial Genomics Platform                                                                                                                                                                                                                                                  | Anke Wienecke-Baldacchino; Catherine Ragimbeau; Fatu Djabi; Jessica Tapp; Lise Pignon; Raoul Salmon; Tamir Abdelrahman                                                                                                                                                                                                                                                                                                                                                                                                                                                                                                                                                                                                                                                                                                                                                                                                                                                                                                                                                                                                                                                                                                                                                                                                                                                                                                                                                                                                                                                                                                                                                                                                                                    |
| EPI_ISL_8314036                                                                                                                                                                                                                                                                                                                                                                                                                                                                                                                                                                                               | Laboratoires Reunis                                                                                                                               | Laboratoire national de sante, Microbiology, Microbial Genomics Platform                                                                                                                                                                                                                                                  | Anke Wienecke-Baldacchino; Bernard Weber; Catherine Ragimbeau; Elodie Solarino; Fatu Djabi; Jessica Tapp; Lise Pignon; Raoul Salmon; Sibel Berger; Tamir Abdelrahman; Virginie Jover                                                                                                                                                                                                                                                                                                                                                                                                                                                                                                                                                                                                                                                                                                                                                                                                                                                                                                                                                                                                                                                                                                                                                                                                                                                                                                                                                                                                                                                                                                                                                                      |
| EPI_ISL_1384181, EPI_ISL_1917553, EPI_ISL_1917851, EPI_ISL_2400596, EPI_ISL_2400787, EPI_ISL_3148485, EPI_ISL_5395211                                                                                                                                                                                                                                                                                                                                                                                                                                                                                         | Laboratoires d'analyses medicales - Ketterhill                                                                                                    | Laboratoire national de sante, Microbiology, Microbial Genomics Platform                                                                                                                                                                                                                                                  | Anke Wienecke-Baldacchino; Caroline Scheiber; Catherine Ragimbeau; Elodie Solarino; Fatu Djabi; Jessica Tapp; Lise Pignon; Raoul Salmon; Serge Vedy; Tamir Abdelrahman; Virginie Jover                                                                                                                                                                                                                                                                                                                                                                                                                                                                                                                                                                                                                                                                                                                                                                                                                                                                                                                                                                                                                                                                                                                                                                                                                                                                                                                                                                                                                                                                                                                                                                    |
| see above                                                                                                                                                                                                                                                                                                                                                                                                                                                                                                                                                                                                     | Laboratoires d'analyses medicales - Ketterhill                                                                                                    | Laboratoire national de sante, Microbiology, Microbial Genomics Platform                                                                                                                                                                                                                                                  |                                                                                                                                                                                                                                                                                                                                                                                                                                                                                                                                                                                                                                                                                                                                                                                                                                                                                                                                                                                                                                                                                                                                                                                                                                                                                                                                                                                                                                                                                                                                                                                                                                                                                                                                                           |
| EPI_ISL_3455731, EPI_ISL_3800183, EPI_ISL_3842036, EPI_ISL_3874114, EPI_ISL_7370822, EPI_ISL_7775335                                                                                                                                                                                                                                                                                                                                                                                                                                                                                                          | Laboratori de Referencia de Catalunya                                                                                                             | Laboratori de Referencia de Catalunya                                                                                                                                                                                                                                                                                     | Bellosillo B.; Canal M.; Hernandez J.; Padilla E.; Ramirez A.; Vilas A.                                                                                                                                                                                                                                                                                                                                                                                                                                                                                                                                                                                                                                                                                                                                                                                                                                                                                                                                                                                                                                                                                                                                                                                                                                                                                                                                                                                                                                                                                                                                                                                                                                                                                   |
| EPI_ISL_8356379                                                                                                                                                                                                                                                                                                                                                                                                                                                                                                                                                                                               | Laboratoria Medyczne Bruss grupa ALAB sp. z o.o.; Medyczne Laboratorium Diagnostyczne, Pracownia Genetyki                                         | 1. Tricity SARS-CoV-2 sequencing consortium: University of Gdansk, Medical University of Gdansk, Vaxican Ltd., Invicta Ltd. 2. National Institute of Public Health - National Institute of Hygiene, Warsaw, Poland                                                                                                        | Celina Cybulska; Karolina Gackowska; Katarzyna Groth; Katarzyna Zacharczuk; Krystyna Bienkowska Szewczyk; Lukasz Rabalski; Maciej Grzybek; Maciej Kosinski; Magdalena Nowakowska; Marcin Lubocki; Malgorzata Sadkowska-Todys; Tomasz Wolkowicz                                                                                                                                                                                                                                                                                                                                                                                                                                                                                                                                                                                                                                                                                                                                                                                                                                                                                                                                                                                                                                                                                                                                                                                                                                                                                                                                                                                                                                                                                                            |
| EPI_ISL_2196301                                                                                                                                                                                                                                                                                                                                                                                                                                                                                                                                                                                               | Laboratório Central de Saude Publica do Estado do Para (LACEN/PA)                                                                                 | Laboratory of Respiratory Viruses and Measles, Oswaldo Cruz Institute, FIOCRUZ                                                                                                                                                                                                                                            | Alice Sampaio Rocha; Ana Carolina Mendonca; Anna Carolina Paixao; Elisa Cavalcante Pereira; Fernando Motta; Luciana Appolinario; Marilda Siqueira on behalf of the Fiocruz COVID-19 Genomic Surveillance Network; Paola Resende; Renata Serrano Lopes; Taina Venas; Valnete Andrade                                                                                                                                                                                                                                                                                                                                                                                                                                                                                                                                                                                                                                                                                                                                                                                                                                                                                                                                                                                                                                                                                                                                                                                                                                                                                                                                                                                                                                                                       |
| EPI_ISL_3231219                                                                                                                                                                                                                                                                                                                                                                                                                                                                                                                                                                                               | Laboratorio Analisi Osp. Città di Castello - Azienda USL Umbria1                                                                                  | Istituto Zooprofilattico Sperimentale dell'Abruzzo e Molise "G. Caporale"                                                                                                                                                                                                                                                 | Ancora M; Calistri P; Cammà C; Curini V; Delli Compagni E; Di Domenico M; Di Pasquale A; Lorusso A; Malagigi V; Mangone I; Marccacci M; Puglia I; Rinaldi A; Savini G; Scialabba S; Tacconi P                                                                                                                                                                                                                                                                                                                                                                                                                                                                                                                                                                                                                                                                                                                                                                                                                                                                                                                                                                                                                                                                                                                                                                                                                                                                                                                                                                                                                                                                                                                                                             |
| EPI_ISL_3535762                                                                                                                                                                                                                                                                                                                                                                                                                                                                                                                                                                                               | Laboratorio Biologia Molecolare Sars Cov2 - UOC Laboratorio Analisi - Servizio Medicina di Laboratorio, Ospedale "San Francesco" - ATS-ASSL Nuoro | Laboratorio Biologia Molecolare Sars Cov2 - UOC Laboratorio Analisi - Servizio Medicina di Laboratorio, Ospedale "San Francesco" - ATS-ASSL Nuoro and Laboratorio specialistico UOC Ematologia - Ospedale "San Francesco" - ATS-ASSL Nuoro                                                                                | Asproni Rosanna; Carta Franco; Fancello Patrizia; Fiamma Maura; Garau Maria Cristina; Mamelì Giuseppe; Palmas Angelo Domenico; Pira Giovanna; Piras Giovanna; Rosu Valentina                                                                                                                                                                                                                                                                                                                                                                                                                                                                                                                                                                                                                                                                                                                                                                                                                                                                                                                                                                                                                                                                                                                                                                                                                                                                                                                                                                                                                                                                                                                                                                              |
| EPI_ISL_2993702, EPI_ISL_4849686, EPI_ISL_5056621, EPI_ISL_7733243                                                                                                                                                                                                                                                                                                                                                                                                                                                                                                                                            | Laboratorio CQRC                                                                                                                                  | CQRC, QUALITY CONTROL CHEMICAL BIOLOGICAL RISK_AOOR Villa Sofia Cervello Palermo                                                                                                                                                                                                                                          | Brunacci G.; Contino F.; Di Gaudio F.                                                                                                                                                                                                                                                                                                                                                                                                                                                                                                                                                                                                                                                                                                                                                                                                                                                                                                                                                                                                                                                                                                                                                                                                                                                                                                                                                                                                                                                                                                                                                                                                                                                                                                                     |
| EPI_ISL_4196757                                                                                                                                                                                                                                                                                                                                                                                                                                                                                                                                                                                               | Laboratorio Central Mg. Luis Alfredo Planciola                                                                                                    | Laboratorio Central Mg. Luis Alfredo Planciola on behalf of 'Proyecto Argentino Interinstitucional de genómica de SARS-CoV-2' (PAIS Consortium)                                                                                                                                                                           | C Pintos; C Rastellini; C Ziehm; J Ousset; L Planciola; M Fernandez; M Mazzeo                                                                                                                                                                                                                                                                                                                                                                                                                                                                                                                                                                                                                                                                                                                                                                                                                                                                                                                                                                                                                                                                                                                                                                                                                                                                                                                                                                                                                                                                                                                                                                                                                                                                             |
| EPI_ISL_1858675, EPI_ISL_2101486, EPI_ISL_2837039, EPI_ISL_3921138, EPI_ISL_5500208                                                                                                                                                                                                                                                                                                                                                                                                                                                                                                                           | Laboratorio Central Noel Nutels                                                                                                                   | Bioinformatics Laboratory / LNCC                                                                                                                                                                                                                                                                                          | Alessandra P Lamarca; Alexandra L Gerber; Amilcar Tanuri; Ana Paula de C Guimarães; Ana Paula de C Guimarães; Ana Tereza R Vasconcelos; Andrea Cony Cavalcanti; Andréa Cony Cavalcanti; Caio Luiz Pereira Ribeiro; Cassia Alves; Cintia Policarpo; Claudia Maria Braga de Mello; Cristiane Gomes da Silva; Diana Mariani; Douglas Terra Machado; Erica Ramos dos Santos Nascimento; Fernanda Leitao dos Santos; Flavio Dias da Silva; Flávio Dias da Silva; Gleidson da Silva de Oliveira; Leandro Magalhães de Souza; Leandro Magalhães de Souza; Liliane Cavalcante; Luiz G P de Almeida; Marcio Henrique de Oliveira Garcia; Mario Sergio Ribeiro; Ricardo Jose Barbosa Salviano; Ronaldo da Silva F Jr; Silvia Carvalho; Thais Felix Cruz                                                                                                                                                                                                                                                                                                                                                                                                                                                                                                                                                                                                                                                                                                                                                                                                                                                                                                                                                                                                             |
| EPI_ISL_4549901, EPI_ISL_4550109                                                                                                                                                                                                                                                                                                                                                                                                                                                                                                                                                                              | Laboratorio Central de Epidemiologia (LCE)                                                                                                        | Unidad de Genómica Avanzada                                                                                                                                                                                                                                                                                               | ; Alejandra García-Gasca; Alejandra Hernandez-Teran; Alejandro Sanchez-Flores; Alfredo Herrera-Estrella; Alicia Ocaña-Mondragon; Andreu Comas-Garcia; Angel Gustavo Salas-Lais; Antonio Loza Roman; Bernardo Martinez-Miguel; Blanca Taboada; Brenda Irasema Maldonado-Meza; Bruno Gomez-Gil; Carla Ivón Herrera-Najera; Carlos F. Arias; Celia Boukadida; Célida Duque Molina; Célida Martínez- Rodríguez; Clara Esperanza Santacruz-Tinoco; Concepción Grajales-Muñiz; Consorcio Mexicano de Vigilancia Genómica (CoViGen-Mex). Authors (in alphabetical order); Julio Elias Alvarado-Yaah; Cristóbal Cháidez-Quiroz; Célida Duque Molina; Daniela Lira Morales; Eduardo Becerril-Vargas; Fernando Fontove-Herrera; Fidencio Mejía-Nepomuceno; Francisco Pulido; Gloria Elena Espinosa-Ayala; Gloria María Molina-Salinas; Gloria Vazquez; Hector Esteban Paz-Juárez; Hector Montoya-Fuentes; Helen Haydee Fernanda Ramirez-Plascencia; Irvin González-López; Jean Pierre Salas-Hernandez; Jose Antonio Enciso-Moreno; Jose Arturo Martinez-Orozco; Jose Jesus Muñoz-Medina; José de Jesús Nuñez-Contreras; Juan Bautista Chale-Dzul; Julissa Enciso-Ibarra; Luis Alberto Ochoa-Carrera; Margarita Matías-Florentino; Maria Guadalupe Santiago-Mauricio; Maria Guadalupe de Jesus Mireles-Rivera; Maria Mujica-Sanchez; Nelly Selem-Mojica; Pavel Isa; Ricardo Ciria Merce; Ricardo Grande; Rosa María Gutiérrez Rios; Santiago Ávila-Rios; Selene Zárate; Susana Lopez; Verónica Mata-Haro; Victor Eduardo Garcia-Arias; Victor Hugo Borja-Aburto                                                                                                                                                                                                      |
| EPI_ISL_2490558, EPI_ISL_3557153                                                                                                                                                                                                                                                                                                                                                                                                                                                                                                                                                                              | Laboratorio Central de Epidemiologia (LCE)                                                                                                        | Centro de Investigación en Enfermedades Infecciosas (CIEN), Instituto Nacional de Enfermedades Respiratorias (INER)                                                                                                                                                                                                       | ; Alejandra García-Gasca; Alejandra García-Gasca; Alejandra Hernández-Terán; Alejandro Sánchez-Flores; Alfredo Herrera-Estrella; Alicia Ocaña-Mondragón; Andreu Comas-García; Angel Gustavo Salas-Lais; Antonio Loza Román; Bernardo Martínez-Miguel; Blanca Taboada; Brenda Irasema Maldonado-Meza; Bruno Gomez-Gil; Bruno Gómez-Gil; Carla Ivón Herrera-Najera; Carlos F. Arias; Celia Boukadida; Clara Esperanza Santacruz-Tinoco; Concepción Grajales-Muñiz; Consorcio Mexicano de Vigilancia Genómica (CoViGen-Mex). Authors (in alphabetical order); Julio Elias Alvarado-Yaah; Cristóbal Cháidez-Quiroz; Célida Duque Molina; Daniela Lira Morales; Eduardo Becerril-Vargas; Fernando Fontove-Herrera; Fidencio Mejía-Nepomuceno; Francisco Pulido; Gloria Elena Espinosa-Ayala; Gloria María Molina-Salinas; Gloria Vazquez; Hector Esteban Paz-Juárez; Hector Montoya-Fuentes; Helen Haydee Fernanda Ramirez-Plascencia; Irvin González-López; Jean Pierre González; Jesús Hernández; Joel Armando Vázquez-Pérez.; Jorge Salas-Hernández; José Antonio Enciso-Moreno; José Arturo Martínez-Orozco; José Esteban Muñoz-Medina; José de Jesús Nuñez-Contreras; Juan Bautista Chale-Dzul; Julissa Enciso-Ibarra; Kathia Elizabeth Tapia-Díaz; Luis Alberto Ochoa-Carrera; Margarita Matías-Florentino; Mario Mujica-Sánchez; Marissa Perez-García; María Guadalupe Santiago-Mauricio; María Guadalupe de Jesús Mireles-Rivera; Nelly Sélem-Mojica; Pavel Isa; Ricardo Ciria Merce; Ricardo Grande; Rosa María Gutiérrez Rios; Rosa María Gutiérrez Rios; Santiago Ávila-Rios; Selene Zárate; Susana Lopez; Verónica Mata-Haro; Victor Eduardo Garcia-Arias; Victor Eduardo Garcia-Arias; Victor Hugo Borja-Aburto                                   |
| EPI_ISL_1416613, EPI_ISL_1811532, EPI_ISL_3347928                                                                                                                                                                                                                                                                                                                                                                                                                                                                                                                                                             | Laboratorio Central de Epidemiologia (LCE)                                                                                                        | Instituto de Biotecnología de la UNAM                                                                                                                                                                                                                                                                                     | ; Alejandra García-Gasca; Alejandra Hernández-Terán; Alejandro Sanchez-Flores; Alejandro Sánchez-Flores; Alfredo Herrera-Estrella; Alicia Ocaña-Mondragon; Andreu Comas-Garcia; Angel Gustavo Salas-Lais; Antonio Loza Román; Bernardo Martínez-Miguel; Blanca Taboada; Brenda Irasema Maldonado-Meza; Bruno Gómez-Gil; Carla Ivón Herrera-Najera; Carlos F. Arias; Celia Boukadida; Clara Esperanza Santacruz-Tinoco; Concepción Grajales-Muñiz; Consorcio Mexicano de Vigilancia Genómica (CoViGen-Mex). Authors (in alphabetical order); Julio Elias Alvarado-Yaah; Cristóbal Cháidez-Quiroz; Célida Duque Molina; Célida Duque-Molina; Célida Martínez- Rodríguez; Daniel Fregoso-Rueda; Daniel Lira Morales; Eduardo Becerril-Vargas; Fernando Fontove-Herrera; Fidencio Mejía-Nepomuceno; Francisco Pulido; Gloria Elena Espinosa-Ayala; Gloria María Molina-Salinas; Gloria Vazquez; Hector Esteban Paz-Juárez; Hector Montoya-Fuentes; Helen Haydee Fernanda Ramirez-Plascencia; Irvin González-López; Jean Pierre González; Jesús Hernández; Joel Armando Vázquez-Pérez.); Jorge Ivan Salinal-Navarez; Jorge Salas-Hernández; José Antonio Enciso-Moreno; José Esteban Muñoz-Medina; José de Jesús Nuñez-Contreras; Juan Bautista Chale-Dzul; Julio Elias Alvarado-Yaah; Julissa Enciso-Ibarra; Kathia Elizabeth Tapia-Díaz; Luis Alberto Ochoa-Carrera; Margarita Matías-Florentino; Mario Mujica-Sánchez; Marissa Perez-García; María Guadalupe Santiago-Mauricio; María Guadalupe de Jesús Mireles-Rivera; Nelly Sélem-Mojica; Pavel Isa; Ricardo Ciria Merce; Ricardo Grande; Rosa María Gutiérrez Rios; Selene Zárate; Susana Lopez; Verónica Mata-Haro; Victor Eduardo Garcia-Arias; Victor Eduardo Garcia-Arias; Victor Hugo Borja-Aburto |
| EPI_ISL_6944529                                                                                                                                                                                                                                                                                                                                                                                                                                                                                                                                                                                               | Laboratorio Central de Salud Publica                                                                                                              | Viral Special Pathogens Branch, Centers for Disease Control and Prevention                                                                                                                                                                                                                                                | Andrea Gómez de la Fuente; Cynthia Vázquez; Emir Talundiz; Joel Montgomery; John Klena; Juan Torales; Justin Lee; María José Ortega; María Liz Gamarra; Shannon Whitmer; Shirley Villalba                                                                                                                                                                                                                                                                                                                                                                                                                                                                                                                                                                                                                                                                                                                                                                                                                                                                                                                                                                                                                                                                                                                                                                                                                                                                                                                                                                                                                                                                                                                                                                 |
| EPI_ISL_5488192, EPI_ISL_5488468, EPI_ISL_5488953, EPI_ISL_5621181                                                                                                                                                                                                                                                                                                                                                                                                                                                                                                                                            | Laboratorio Central de Saude Publica do Amazonas - LACEN-AM                                                                                       | Laboratorio de Ecologia de Doencas Transmissíveis na Amazonia, Instituto Leonidas e Maria Deane - Fiocruz Amazonia                                                                                                                                                                                                        | André Corado; Arlesson Viana Da Silva; Felipe Naveca; Felipe Naveca on behalf of the Fiocruz COVID-19 Genomic Surveillance Network; Fernanda Nascimento; George Silva; Luciana Gonçalves; Maria Júlia Brandão; Matilde Mejía; Valdinete Nascimento; Victor Souza                                                                                                                                                                                                                                                                                                                                                                                                                                                                                                                                                                                                                                                                                                                                                                                                                                                                                                                                                                                                                                                                                                                                                                                                                                                                                                                                                                                                                                                                                          |
| EPI_ISL_2536316                                                                                                                                                                                                                                                                                                                                                                                                                                                                                                                                                                                               | Laboratorio Central de Saude Publica do Estado da Paraiba (LACEN-PB)                                                                              | Laboratory of Respiratory Viruses and Measles, Oswaldo Cruz Institute, FIOCRUZ                                                                                                                                                                                                                                            | Alice Sampaio Rocha; Ana Carolina Mendonca; Anna Carolina Paixao; Dalane Loudal Florentino Teixeira; Elisa Cavalcante Pereira; Fernando Motta; Joao Felipe Bezerra; Luciana Appolinario; Marilda Siqueira on behalf of the Fiocruz COVID-19 Genomic Surveillance Network; Paola Resende; Renata Serrano Lopes; Taina Venas                                                                                                                                                                                                                                                                                                                                                                                                                                                                                                                                                                                                                                                                                                                                                                                                                                                                                                                                                                                                                                                                                                                                                                                                                                                                                                                                                                                                                                |
| EPI_ISL_4081081                                                                                                                                                                                                                                                                                                                                                                                                                                                                                                                                                                                               | Laboratorio Central de Saude Publica do Estado da Paraiba (LACEN/PB)                                                                              | Laboratory of Respiratory Viruses and Measles, Oswaldo Cruz Institute, FIOCRUZ                                                                                                                                                                                                                                            | Alice Sampaio Rocha; Ana Carolina Mendonca; Anna Carolina Paixao; Dalane Loudal Florentino Teixeira; Elisa Cavalcante Pereira; Fernando Motta; Joao Felipe Bezerra; Luciana Appolinario; Marilda Siqueira on behalf of the Fiocruz COVID-19 Genomic Surveillance Network; Paola Resende; Renata Serrano Lopes; Taina Venas                                                                                                                                                                                                                                                                                                                                                                                                                                                                                                                                                                                                                                                                                                                                                                                                                                                                                                                                                                                                                                                                                                                                                                                                                                                                                                                                                                                                                                |
| EPI_ISL_8266299, EPI_ISL_8325137                                                                                                                                                                                                                                                                                                                                                                                                                                                                                                                                                                              | Laboratorio Central de Saude Publica do Estado de Goias (LACEN/GO)                                                                                | Laboratory of Respiratory Viruses and Measles, Oswaldo Cruz Institute, FIOCRUZ                                                                                                                                                                                                                                            | Alice Sampaio Rocha; Ana Flavia Mendonça; Bruna Mendonça da Silva; Carmen Helena Ramos; Cassiane Casanova; Elisa Cavalcante Pereira; Fernando Motta; Flavia Pereira Amorim da Silva; Igor Arantes; Jéssica Graça Macedo de Carvalho; Larissa Macedo Pinto; Luciana Appolinario; Luiz Augusto Pereira; Marilda Siqueira on behalf of the Fiocruz COVID-19 Genomic Surveillance Network; Paola Resende; Rafael Souza Guedes; Victor Guimarães; Vinícius Lemes da Silva                                                                                                                                                                                                                                                                                                                                                                                                                                                                                                                                                                                                                                                                                                                                                                                                                                                                                                                                                                                                                                                                                                                                                                                                                                                                                      |
| EPI_ISL_5329002, EPI_ISL_6771816, EPI_ISL_8004432                                                                                                                                                                                                                                                                                                                                                                                                                                                                                                                                                             | Laboratorio Central de Saude Publica do Estado de Santa Catarina (LACEN/SC)                                                                       | Laboratory of Respiratory Viruses and Measles, Oswaldo Cruz Institute, FIOCRUZ                                                                                                                                                                                                                                            | Alice Sampaio Rocha; Aline Moreira; Ana Carolina Mendonca; Anna Carolina Paixao; Bruna Mendonça da Silva; Darci Buerger Rovaris; Elisa Cavalcante Pereira; Fernando Motta; Igor Arantes; Jéssica Graça Macedo de Carvalho; Larissa Macedo Pinto; Luciana Appolinario; Marilda Siqueira on behalf of the Fiocruz COVID-19 Genomic Surveillance Network; Paola Resende; Renata Serrano Lopes; Sandra Bianchini Fernandes; Taina Venas; Thiago Estevam Parente; Victor Guimarães                                                                                                                                                                                                                                                                                                                                                                                                                                                                                                                                                                                                                                                                                                                                                                                                                                                                                                                                                                                                                                                                                                                                                                                                                                                                             |
| EPI_ISL_2983156                                                                                                                                                                                                                                                                                                                                                                                                                                                                                                                                                                                               | Laboratorio Central de Saude Publica do Estado do Amapa (LACEN/AP)                                                                                | Laboratory of Respiratory Viruses and Measles, Oswaldo Cruz Institute, FIOCRUZ                                                                                                                                                                                                                                            | Agatha Cristinne Prudencio; Alice Sampaio Rocha; Ana Carolina Mendonca; Andrea Santos Costa; Anna Carolina Paixao; Anne Caroline da Silva Soledade; Elisa Cavalcante Pereira; Fernando Motta; Igor Leonardo Arantes Gomes; Lindomar dos Anjos Silva; Luciana Appolinario; Marcia Socorro Pereira Cavalcante; Marilda Siqueira on behalf of the Fiocruz COVID-19 Genomic Surveillance Network; Paola Resende; Renata Serrano Lopes; Taina Venas                                                                                                                                                                                                                                                                                                                                                                                                                                                                                                                                                                                                                                                                                                                                                                                                                                                                                                                                                                                                                                                                                                                                                                                                                                                                                                            |
| EPI_ISL_1181397                                                                                                                                                                                                                                                                                                                                                                                                                                                                                                                                                                                               | Laboratorio Central de Saude Publica do Estado do Espitito Santo (LACEN-ES)                                                                       | Laboratory of Respiratory Viruses and Measles, Oswaldo Cruz Institute, FIOCRUZ                                                                                                                                                                                                                                            | Alice Sampaio Rocha; Ana Carolina Mendonca; Anna Carolina Paixao; Fernando Motta; Luciana Appolinario; Marilda Siqueira on behalf of the Fiocruz COVID-19 Genomic Surveillance Network; Paola Resende; Renata Serrano Lopes; Rodrigo Ribeiro Rodrigues                                                                                                                                                                                                                                                                                                                                                                                                                                                                                                                                                                                                                                                                                                                                                                                                                                                                                                                                                                                                                                                                                                                                                                                                                                                                                                                                                                                                                                                                                                    |
| EPI_ISL_6172541                                                                                                                                                                                                                                                                                                                                                                                                                                                                                                                                                                                               | Laboratorio Central de Saude Publica do Estado do Para (LACEN/PA)                                                                                 | Laboratory of Respiratory Viruses and Measles, Oswaldo Cruz Institute, FIOCRUZ                                                                                                                                                                                                                                            | Alice Sampaio Rocha; Bruna Mendonça da Silva; Elisa Cavalcante Pereira; Fernando Motta; Igor Arantes; Jéssica Graça Macedo de Carvalho; Larissa Macedo Pinto; Luciana Appolinario; Marilda Siqueira on behalf of the Fiocruz COVID-19 Genomic Surveillance Network; Paola Resende; Valnete Andrade                                                                                                                                                                                                                                                                                                                                                                                                                                                                                                                                                                                                                                                                                                                                                                                                                                                                                                                                                                                                                                                                                                                                                                                                                                                                                                                                                                                                                                                        |
| EPI_ISL_3914023                                                                                                                                                                                                                                                                                                                                                                                                                                                                                                                                                                                               | Laboratorio Central de Saude Publica do Estado do Parana (Instituto de Biologia Molecular do Paraná (LACEN-PR)                                    | Instituto Carlos Chagas - Fiocruz                                                                                                                                                                                                                                                                                         | Alessandra De Melo Aguiar; Andrea Akemi Suzukawa; Andréa Rodrigues Ávila; Bruno Dallagioanna; Dalila Zanetti; Eduardo Baisanelli; Emanuel Maltempi de Souza; Fabio Passetti; Fabricio Klerlynton Marchini; Fábio de Oliveira Pedrosa; Guilherme Becker; Heisson Faoro; Helen Geremias dos Santos; Irina Nastassja Riediger; Letusa Albrecht; Lucas Blanes; Luis Gustavo Morello; Lysangela Ronalte Alves; Maria do Carmo Debur; Mauro de Medeiros Oliveira; Michelle Orane Schemberger; Paola Cristina Resende; Sheila Cristina Nardelli; Tiago Gräf; Valter Antônio de Baura                                                                                                                                                                                                                                                                                                                                                                                                                                                                                                                                                                                                                                                                                                                                                                                                                                                                                                                                                                                                                                                                                                                                                                             |
| EPI_ISL_4271129                                                                                                                                                                                                                                                                                                                                                                                                                                                                                                                                                                                               | Laboratorio Central de Saude Publica do Estado do Rio Grande do Sul (LACEN-RS)                                                                    | Laboratory of Respiratory Viruses and Measles, Oswaldo Cruz Institute, FIOCRUZ                                                                                                                                                                                                                                            | Agatha Cristinne Soares; Alice Sampaio Rocha; Ana Carolina Mendonca; Anderson Brandao Leite; Anna Carolina Paixao; Elisa Cavalcante Pereira; Fernando Motta; Igor Leonardo Arantes; Luciana Appolinario; Marilda Siqueira on behalf of the Fiocruz COVID-19 Genomic Surveillance Network; Paola Resende; Renata Serrano Lopes; Taina Venas                                                                                                                                                                                                                                                                                                                                                                                                                                                                                                                                                                                                                                                                                                                                                                                                                                                                                                                                                                                                                                                                                                                                                                                                                                                                                                                                                                                                                |
| EPI_ISL_3235313                                                                                                                                                                                                                                                                                                                                                                                                                                                                                                                                                                                               | Laboratorio Central de Saude Publica do Estado do Tocantins                                                                                       | Laboratory of Respiratory Viruses and Measles,                                                                                                                                                                                                                                                                            | Agatha Soares; Alice Sampaio Rocha; Ana Carolina Mendonca; Anna Carolina Paixao; Elisa Cavalcante Pereira; Fernando Motta; Igor Arantes; Jucimária Dantas Galvão; Luciana Appolinario; Marilda Siqueira on behalf of the Fiocruz COVID-19 Genomic Surveillance                                                                                                                                                                                                                                                                                                                                                                                                                                                                                                                                                                                                                                                                                                                                                                                                                                                                                                                                                                                                                                                                                                                                                                                                                                                                                                                                                                                                                                                                                            |





|                                                                                                                                                                                                                                                                                                                                                                                                                                                                                                                                                                                                                                                                                                                                                                                                                                                                                                                                                                                                                                                                             |                                                                                |                                                                                                                            |                                                                                                                                                                                                                                                                                                                                                                                                                                                                                                                                                                                                                                                                                                                                                                                                                                                                                                                                                                  |
|-----------------------------------------------------------------------------------------------------------------------------------------------------------------------------------------------------------------------------------------------------------------------------------------------------------------------------------------------------------------------------------------------------------------------------------------------------------------------------------------------------------------------------------------------------------------------------------------------------------------------------------------------------------------------------------------------------------------------------------------------------------------------------------------------------------------------------------------------------------------------------------------------------------------------------------------------------------------------------------------------------------------------------------------------------------------------------|--------------------------------------------------------------------------------|----------------------------------------------------------------------------------------------------------------------------|------------------------------------------------------------------------------------------------------------------------------------------------------------------------------------------------------------------------------------------------------------------------------------------------------------------------------------------------------------------------------------------------------------------------------------------------------------------------------------------------------------------------------------------------------------------------------------------------------------------------------------------------------------------------------------------------------------------------------------------------------------------------------------------------------------------------------------------------------------------------------------------------------------------------------------------------------------------|
| EPI_ISL_2988793                                                                                                                                                                                                                                                                                                                                                                                                                                                                                                                                                                                                                                                                                                                                                                                                                                                                                                                                                                                                                                                             | Los Angeles County Public Health Laboratories                                  | Andersen lab at Scripps Research                                                                                           | H. Rivas; P. Hemarajata; SEARCH Alliance San Diego with N. Green; T. Burleson et al.                                                                                                                                                                                                                                                                                                                                                                                                                                                                                                                                                                                                                                                                                                                                                                                                                                                                             |
| EPI_ISL_7455890                                                                                                                                                                                                                                                                                                                                                                                                                                                                                                                                                                                                                                                                                                                                                                                                                                                                                                                                                                                                                                                             | Louisiana Office of Public Health Laboratory                                   | LSUHS Emerging Viral Threat Laboratory                                                                                     | Adrian Almodovar; Alexander Mjajis; Andrew D. Yurochko; Christopher G. Kevill; Gregory L. Ware; Jennifer L. Carroll; Jeremy P. Kamil; John A. Vanchiere; Krista Queen; Maarten Van Diest; Rona S. Scott                                                                                                                                                                                                                                                                                                                                                                                                                                                                                                                                                                                                                                                                                                                                                          |
| EPI_ISL_5559788                                                                                                                                                                                                                                                                                                                                                                                                                                                                                                                                                                                                                                                                                                                                                                                                                                                                                                                                                                                                                                                             | Lucena United Doctors Hospital And Medical Center                              | Philippine Genome Center                                                                                                   | Alethea R. de Guzman; Alyssa Joyce E. Telles; Anna Ong-Lim; Arienne A. Zamora; Benedict A. Maralit; Carlo M. Lapid; Celia Carlos; Cynthia P. Saloma; Devon Ray Pacial; Diomedes A. Cariño; Edsel Maurice Salvana; El King D. Morado; Elcid Aaron R. Pangilinan; Eva Maria Cutiungco-de la Paz; Francis A. Tablizo; Henrietta Marie Rodriguez; Jaime C. Montoya; Jan Michael C. Yap; Jarvin E. Nipales; Jo-Hannah S. Llamas; John Michael Egana; John Q. Wong; Joshua Jose Endozo; Juan Antonio R. Magalang; Karol Sophia Agape R. Padilla; Kris P. Punayan; Kristina Patriz Dela Cruz; Lindsay Clare D.L. Carandang; Ma. Exanil Plantig; Marc Edsel C. Ayes; Maria Rosario Singh-Vergeire; Maria Sofia L. Yangzon; Marielle M. Gamboa; Marissa Alejandria; Niña Francesca Bustamante; Razel Nikka M. Hao; Renato Jacinto Q. Mantaring; Rianna Patricia S. Cruz; Shiela Mae M. Araiza; Yvonne Valerie Austria; Zipporah Mariebelle R. Enriquez; Zyrel V. Mollejon |
| EPI_ISL_530167, EPI_ISL_873250, EPI_ISL_1365405, EPI_ISL_1531650                                                                                                                                                                                                                                                                                                                                                                                                                                                                                                                                                                                                                                                                                                                                                                                                                                                                                                                                                                                                            | M Health Fairview                                                              | Minnesota Department of Health, Public Health Laboratory                                                                   | Alexandra Lorentz; Jacob Garfin; Matt Plumb; and Xiong Wang                                                                                                                                                                                                                                                                                                                                                                                                                                                                                                                                                                                                                                                                                                                                                                                                                                                                                                      |
| EPI_ISL_2451827                                                                                                                                                                                                                                                                                                                                                                                                                                                                                                                                                                                                                                                                                                                                                                                                                                                                                                                                                                                                                                                             | MA State Public Health Laboratory                                              | Centers for Disease Control and Prevention Division of Viral Diseases, Pathogen Discovery                                  | Alison Laufer Halpin; Ben L. Rambo-Martin; Clinton R. Paden; Dakota Howard; Darlene Wagner; Dave Wentworth; Dhwani Batra; Jasmine Padilla; Justin Lee; Katie Dillon; Krista Queen; Kristen Knipe; Kristine Lacey; Mark Burroughs; Matthew Schmerer; Mili Sheth; Peter Cook; Sam Shepard; Sarah Nobles; Shoshona Le; Suxiang Tong; Vivien Dugan; Yvette Unoarumhi                                                                                                                                                                                                                                                                                                                                                                                                                                                                                                                                                                                                 |
| EPI_ISL_3451137                                                                                                                                                                                                                                                                                                                                                                                                                                                                                                                                                                                                                                                                                                                                                                                                                                                                                                                                                                                                                                                             | MANKWENG LABORATORY                                                            | National Institute for Communicable Diseases of the National Health Laboratory Service                                     | Amoako DG; Bhiman JN; Everatt J; Ismail A; Mahlangu B; Mnguni A; Mohale T; Ntuli N; Scheepers C                                                                                                                                                                                                                                                                                                                                                                                                                                                                                                                                                                                                                                                                                                                                                                                                                                                                  |
| EPI_ISL_4494411                                                                                                                                                                                                                                                                                                                                                                                                                                                                                                                                                                                                                                                                                                                                                                                                                                                                                                                                                                                                                                                             | MB-Cadham Provincial laboratory                                                | Manitoba Cadham Provincial Laboratory                                                                                      | Anna Majer; Anneliese Landgraff; David Alexander; Elsie Grudeski; Gary Van Domselaar; Grace Seo; Jared Bullard; Jennifer Tanner; Kerry Dust; Morag Graham; Nat; Natalie Knox; Paul Van Caesele; Philip Mabon; Rhiannon Huzarewicz; Russell Mandes; Shari Tyson                                                                                                                                                                                                                                                                                                                                                                                                                                                                                                                                                                                                                                                                                                   |
| EPI_ISL_1594211, EPI_ISL_4494343, EPI_ISL_5845298, EPI_ISL_6340286                                                                                                                                                                                                                                                                                                                                                                                                                                                                                                                                                                                                                                                                                                                                                                                                                                                                                                                                                                                                          | MB-Cadham Provincial laboratory                                                | National Microbiology Laboratory (NML)                                                                                     | Anna Majer; Anneliese Landgraff; CanCOGen's metadata curation team; Darian Hole; David Alexander; Elsie Grudeski; Gary Van Domselaar; Grace Seo; Jared Bullard; Jennifer Tanner; Kerry Dust; Kirsten Gibson; Madison Chapel; Morag Graham; Nat; Natalie Knox; Nathalie Bastien; Paul Van Caesele; Philip Mabon; Public Health Agency of Canada CanCOGen team; Rhiannon Huzarewicz; Russell Mandes; Shari Tyson; Timothy Booth; Yan Li                                                                                                                                                                                                                                                                                                                                                                                                                                                                                                                            |
| EPI_ISL_1226131                                                                                                                                                                                                                                                                                                                                                                                                                                                                                                                                                                                                                                                                                                                                                                                                                                                                                                                                                                                                                                                             | MD DOH Laboratories Administration                                             | Genomics and Discovery, Respiratory Viruses Branch, Division of Viral Diseases, Centers for Disease Control and Prevention | Anna Montmayeur; Anna Uehara; Ben L. Rambo-Martin; Clinton R. Paden; Dhwani Batra; Haibin Wang; Jasmine Padilla; Jing Zhang; Justin Lee; Katie Dillon; Krista Queen; Kristen Knipe; Kristine Lacey; Lori Rowe; Mark Burroughs; Matthew Schmerer; Mili Sheth; Peter W. Cook; Rachel Marine; Sam Shepard; Sarah Nobles; Shoshona Le; Suxiang Tong; Yan Li; Ying Tao                                                                                                                                                                                                                                                                                                                                                                                                                                                                                                                                                                                                |
| EPI_ISL_4929861                                                                                                                                                                                                                                                                                                                                                                                                                                                                                                                                                                                                                                                                                                                                                                                                                                                                                                                                                                                                                                                             | MD PHL                                                                         | MD PHL                                                                                                                     | Ami Patel; Eric N. Keller; Jillian Loomis; Kwang Low; Terence L. Moore; and Robert Myers                                                                                                                                                                                                                                                                                                                                                                                                                                                                                                                                                                                                                                                                                                                                                                                                                                                                         |
| EPI_ISL_1281789, EPI_ISL_1352296                                                                                                                                                                                                                                                                                                                                                                                                                                                                                                                                                                                                                                                                                                                                                                                                                                                                                                                                                                                                                                            | MDI Limbach Berlin GmbH                                                        | Robert Koch Institute                                                                                                      |                                                                                                                                                                                                                                                                                                                                                                                                                                                                                                                                                                                                                                                                                                                                                                                                                                                                                                                                                                  |
| EPI_ISL_1724437, EPI_ISL_4042569, EPI_ISL_4224342, EPI_ISL_4225403, EPI_ISL_4227203, EPI_ISL_4446695, EPI_ISL_6467579, EPI_ISL_7070702, EPI_ISL_7750741, EPI_ISL_7751558, EPI_ISL_7755959                                                                                                                                                                                                                                                                                                                                                                                                                                                                                                                                                                                                                                                                                                                                                                                                                                                                                   | see above                                                                      | MDI Limbach Berlin GmbH; MVZ Labor Berlin                                                                                  | Robert Koch Institute                                                                                                                                                                                                                                                                                                                                                                                                                                                                                                                                                                                                                                                                                                                                                                                                                                                                                                                                            |
| EPI_ISL_1227653                                                                                                                                                                                                                                                                                                                                                                                                                                                                                                                                                                                                                                                                                                                                                                                                                                                                                                                                                                                                                                                             | MEMORIAL SLOAN KETTERING CANCER CENTER                                         | Wadsworth Center, New York State Department of Health                                                                      | Alexis Russel; Daryl M. Lamson; Erasmus Schneider; Erica Lasek-Nesselquist; John Kelly; Jonathan Pitnick; Kirsten St. George; Matthew Shudt; Melissa A Leisner; Navjot Singh                                                                                                                                                                                                                                                                                                                                                                                                                                                                                                                                                                                                                                                                                                                                                                                     |
| EPI_ISL_767688                                                                                                                                                                                                                                                                                                                                                                                                                                                                                                                                                                                                                                                                                                                                                                                                                                                                                                                                                                                                                                                              | MEMORIAL SLOAN KETTERING CANCER CENTER                                         | Wadsworth Center, New York State Department of Health                                                                      | Alexis Russel; Daryl M. Lamson; Erasmus Schneider; Erica Lasek-Nesselquist; John Kelly; Jonathan Pitnick; Kirsten St. George; Matthew Shudt; Melissa A Leisner; Navjot Singh; Sara Griesemer                                                                                                                                                                                                                                                                                                                                                                                                                                                                                                                                                                                                                                                                                                                                                                     |
| EPI_ISL_569585, EPI_ISL_2453370, EPI_ISL_2596206, EPI_ISL_2660271, EPI_ISL_3055111, EPI_ISL_3434325, EPI_ISL_3803509                                                                                                                                                                                                                                                                                                                                                                                                                                                                                                                                                                                                                                                                                                                                                                                                                                                                                                                                                        | see above                                                                      | MEPHI, Aix Marseille University                                                                                            | Anthony LEVASSEUR                                                                                                                                                                                                                                                                                                                                                                                                                                                                                                                                                                                                                                                                                                                                                                                                                                                                                                                                                |
| EPI_ISL_245342, EPI_ISL_7747443                                                                                                                                                                                                                                                                                                                                                                                                                                                                                                                                                                                                                                                                                                                                                                                                                                                                                                                                                                                                                                             | MI - Michigan Department of Health and Human Services - Bureau of Laboratories | Centers for Disease Control and Prevention Division of Viral Diseases, Pathogen Discovery                                  | Alex Burgin; Alison Laufer Halpin; Ben L. Rambo-Martin; Ben Rambo-Martin; Clinton Paden; Clinton R. Paden; Dakota Howard; Darlene Wagner; Dave Wentworth; Dhwani Batra; Jasmine Padilla; Joseph Madden; Justin Lee; Katie Dillon; Krista Queen; Kristen Knipe; Kristine Lacey; Mark Burroughs; Matthew Schmerer; Meghan Bentz; Mili Sheth; Peter Cook; Sam Shepard; Sarah Nobles; Shoshona Le; Suxiang Tong; Vivien Dugan; Yvette Unoarumhi                                                                                                                                                                                                                                                                                                                                                                                                                                                                                                                      |
| EPI_ISL_2377527                                                                                                                                                                                                                                                                                                                                                                                                                                                                                                                                                                                                                                                                                                                                                                                                                                                                                                                                                                                                                                                             | MLD Szpital Św. Elżbiety                                                       | 1. National Institute of Public Health - National Institute of Hygiene; 2. Eurofins Genomics Europe Sequencing GmbH        | ECDC COVID-19 WGS support team; Eurofins Genomics Europe Sequencing Team; Gierczyński Rafal; Sadkowska-Todys Małgorzata; Wolkowicz Tomasz; Zacharczuk Katarzyna                                                                                                                                                                                                                                                                                                                                                                                                                                                                                                                                                                                                                                                                                                                                                                                                  |
| EPI_ISL_710592                                                                                                                                                                                                                                                                                                                                                                                                                                                                                                                                                                                                                                                                                                                                                                                                                                                                                                                                                                                                                                                              | MLF Care AB                                                                    | The Public Health Agency of Sweden                                                                                         | Department of Microbiology; The Public Health Agency of Sweden                                                                                                                                                                                                                                                                                                                                                                                                                                                                                                                                                                                                                                                                                                                                                                                                                                                                                                   |
| EPI_ISL_6474091                                                                                                                                                                                                                                                                                                                                                                                                                                                                                                                                                                                                                                                                                                                                                                                                                                                                                                                                                                                                                                                             | MO State Public Health Laboratory                                              | Centers for Disease Control and Prevention Division of Viral Diseases, Pathogen Discovery                                  | Alex Burgin; Ben Rambo-Martin; Clinton Paden; Dakota Howard; Dave Wentworth; Dhwani Batra; Jasmine Padilla; Joseph Madden; Justin Lee; Kristen Knipe; Kristine Lacey; Mark Burroughs; Matthew Schmerer; Meghan Bentz; Mili Sheth; Peter Cook; Sam Shepard; Sarah Nobles; Vivien Dugan; Yvette Unoarumhi                                                                                                                                                                                                                                                                                                                                                                                                                                                                                                                                                                                                                                                          |
| EPI_ISL_2444210                                                                                                                                                                                                                                                                                                                                                                                                                                                                                                                                                                                                                                                                                                                                                                                                                                                                                                                                                                                                                                                             | MONTE APRAZIVEL                                                                | Instituto Butantan / FAMERP                                                                                                | Antonio Jorge Martins; Claudia Renata dos Santos Barros; David Schlesinger; Debora Botequiu Moretti; Dimas Tadeu Covas; Elaine Cristina Marqueze; Elaine Vieira Santos; Evandra Strazza Rodrigues; Heidge Fukumasu; Jayme Augusto de Souza-Neto; José Salvatore Leister Patané; Luiz Alcantara; Luiz Lehmann Coutinho; Maria Carolina Elias; Maurício Lacerda Nogueira; Rafael dos Santos Bezerra; Raul Machado Neto; Rejane Maria Tommasini Grotto; Ricardo Haddad; Sandra Coccuzzo Sampaio Vessoni; Simone Kashima; Svetoslav Nanev Slavov; Vincent Louis Viala                                                                                                                                                                                                                                                                                                                                                                                                |
| EPI_ISL_954258                                                                                                                                                                                                                                                                                                                                                                                                                                                                                                                                                                                                                                                                                                                                                                                                                                                                                                                                                                                                                                                              | MRC/UJURI & LSHTM Uganda Research Unit                                         | Where sequence data have been generated and submitted to GISAID                                                            | Dan Lule Bugembe; Isaac Seeewanyana; Matthew Cotten; My V.T. Phan; Patrick Semanda; Pontiano Kaleebu; Susan Nabadda                                                                                                                                                                                                                                                                                                                                                                                                                                                                                                                                                                                                                                                                                                                                                                                                                                              |
| EPI_ISL_4572539, EPI_ISL_8207742                                                                                                                                                                                                                                                                                                                                                                                                                                                                                                                                                                                                                                                                                                                                                                                                                                                                                                                                                                                                                                            | MS PHL                                                                         | MS PHL                                                                                                                     | Beata Karolewicz; Beata Karowlewicz; Daphne Ware; Jin Yiyao; Saihou Ceessay; Srimadhav Nallani Chakravartula                                                                                                                                                                                                                                                                                                                                                                                                                                                                                                                                                                                                                                                                                                                                                                                                                                                     |
| EPI_ISL_2966596                                                                                                                                                                                                                                                                                                                                                                                                                                                                                                                                                                                                                                                                                                                                                                                                                                                                                                                                                                                                                                                             | MS Public Health Laboratory                                                    | University of Mississippi Medical Center, Molecular and Genomics Core Facility                                             | Ashley C. Johnson; D. Ashley Robinson; Ithiel J. Frame; Krishna K. Ayyalasomayajula; Michael R. Garrett; Wenjie Wu                                                                                                                                                                                                                                                                                                                                                                                                                                                                                                                                                                                                                                                                                                                                                                                                                                               |
| EPI_ISL_802267, EPI_ISL_1709328, EPI_ISL_5253373, EPI_ISL_6492902, EPI_ISL_6493661                                                                                                                                                                                                                                                                                                                                                                                                                                                                                                                                                                                                                                                                                                                                                                                                                                                                                                                                                                                          | MSSH Clinical Microbiology Laboratories                                        | MSSH Pathogen Surveillance Program                                                                                         | Adolfo García-Sastre; Adriana van de Guchte; Ajay Obla; Alberto Paniz-Mondolfi; Ana S. Gonzalez-Reiche; Andrew Kasarskis; Angela Amoako; Ashley S. Salimbangon; Ashley Salimbangon; Betsaida Salom Melo; Bremy Alburquerque; Brienne Ciferri; Charles Gleason; Daniel Fioda; Deena R. Altman; Denise Jurczynski; Elena Hirsch; Emilia Mia Sordillo; Emily Ferreri; Gintaras Deikus; Giulio Kleiner; Gopi Patel; Hala Alshammary; Harm van Bakel; Irina Oussenko; Jayeeta Dutta; Juan Soto; Julia Matthews; Katherine Beach; Kathryn Twyman; Kayla Russo; Komal Srivastava; Levy Sominsky; Mahmoud Aawad; Marta Luksza; Matthew M. Hernandez; Melissa Gitman; Michael D. Nowak; Mitchell J. Sullivan; Nancy Francoeur; Rachel Chernet; Robert Sebra; Sarah Schaefer; Shelcie Fabre; Shwetha Hara Sridhar; Viviana Simon; Ying-Chih Wang; Zain Khalil; Zenab Khan                                                                                                  |
| EPI_ISL_2691042, EPI_ISL_2691061, EPI_ISL_2691072                                                                                                                                                                                                                                                                                                                                                                                                                                                                                                                                                                                                                                                                                                                                                                                                                                                                                                                                                                                                                           | MSK Microbiology Lab                                                           | MSK Microbiology Lab                                                                                                       | Esther Babady; Krupa Jani; Tracy McMillen                                                                                                                                                                                                                                                                                                                                                                                                                                                                                                                                                                                                                                                                                                                                                                                                                                                                                                                        |
| EPI_ISL_4280374                                                                                                                                                                                                                                                                                                                                                                                                                                                                                                                                                                                                                                                                                                                                                                                                                                                                                                                                                                                                                                                             | MUSC Molecular Pathology Laboratory                                            | MUSC Molecular Pathology Laboratory                                                                                        | Dariusz Pytel; Frederick S. Nolte; Jaclyn Dunne; Jim Madory; Julie W. Hirschhorn; Kristen Maurer; Scott Curry; W. Bailey Glen Jr                                                                                                                                                                                                                                                                                                                                                                                                                                                                                                                                                                                                                                                                                                                                                                                                                                 |
| EPI_ISL_5118118, EPI_ISL_5118126                                                                                                                                                                                                                                                                                                                                                                                                                                                                                                                                                                                                                                                                                                                                                                                                                                                                                                                                                                                                                                            | MVZ Dr. Eberhard & Partner Dortmund                                            | Robert Koch Institute                                                                                                      |                                                                                                                                                                                                                                                                                                                                                                                                                                                                                                                                                                                                                                                                                                                                                                                                                                                                                                                                                                  |
| EPI_ISL_2111248, EPI_ISL_7097068                                                                                                                                                                                                                                                                                                                                                                                                                                                                                                                                                                                                                                                                                                                                                                                                                                                                                                                                                                                                                                            | MVZ Labor Dr. Fenner und Kollegen (Standort Hamburg)                           | Robert Koch Institute                                                                                                      |                                                                                                                                                                                                                                                                                                                                                                                                                                                                                                                                                                                                                                                                                                                                                                                                                                                                                                                                                                  |
| EPI_ISL_1349553, EPI_ISL_2262232, EPI_ISL_2388138, EPI_ISL_4609638, EPI_ISL_4609644, EPI_ISL_7092636                                                                                                                                                                                                                                                                                                                                                                                                                                                                                                                                                                                                                                                                                                                                                                                                                                                                                                                                                                        | MVZ Labor Dr. Limbach & Kollegen GbR                                           | Robert Koch Institute                                                                                                      |                                                                                                                                                                                                                                                                                                                                                                                                                                                                                                                                                                                                                                                                                                                                                                                                                                                                                                                                                                  |
| EPI_ISL_8216699, EPI_ISL_9109559                                                                                                                                                                                                                                                                                                                                                                                                                                                                                                                                                                                                                                                                                                                                                                                                                                                                                                                                                                                                                                            | MVZ Labor Dr. Quade & Kollegen GmbH                                            | Robert Koch Institute                                                                                                      |                                                                                                                                                                                                                                                                                                                                                                                                                                                                                                                                                                                                                                                                                                                                                                                                                                                                                                                                                                  |
| EPI_ISL_2869969, EPI_ISL_2871537, EPI_ISL_2871747                                                                                                                                                                                                                                                                                                                                                                                                                                                                                                                                                                                                                                                                                                                                                                                                                                                                                                                                                                                                                           | MVZ Labor Krone GbR                                                            | Center of Medical Microbiology, Virology, and Hospital Hygiene, University of Duesseldorf                                  | Alexander Dilthey; Andreas Walker; André Heimbach; Bärbel Lipke; Carsten Tiemann; Dennis Deschka; Janine Silvery; Julia Fazaal; Jörg Timm; Kerstin Ludwig; Klaus Pfeffer; Malte Kohns Vasconcelos; Per Hoffmann; Tobias Wienemann; Torsten Houwaart                                                                                                                                                                                                                                                                                                                                                                                                                                                                                                                                                                                                                                                                                                              |
| EPI_ISL_1351313, EPI_ISL_1354647, EPI_ISL_1566055, EPI_ISL_1566086, EPI_ISL_2126249, EPI_ISL_4936990, EPI_ISL_5904415, EPI_ISL_6954926                                                                                                                                                                                                                                                                                                                                                                                                                                                                                                                                                                                                                                                                                                                                                                                                                                                                                                                                      | see above                                                                      | MVZ Labor Krone GbR                                                                                                        | Robert Koch Institute                                                                                                                                                                                                                                                                                                                                                                                                                                                                                                                                                                                                                                                                                                                                                                                                                                                                                                                                            |
| EPI_ISL_4044336                                                                                                                                                                                                                                                                                                                                                                                                                                                                                                                                                                                                                                                                                                                                                                                                                                                                                                                                                                                                                                                             | MVZ Labor Passau GbR                                                           | Robert Koch Institute                                                                                                      |                                                                                                                                                                                                                                                                                                                                                                                                                                                                                                                                                                                                                                                                                                                                                                                                                                                                                                                                                                  |
| EPI_ISL_3044182, EPI_ISL_3045041, EPI_ISL_4939349                                                                                                                                                                                                                                                                                                                                                                                                                                                                                                                                                                                                                                                                                                                                                                                                                                                                                                                                                                                                                           | MVZ Medizinisches Labor Hannover GmbH                                          | Robert Koch Institute                                                                                                      |                                                                                                                                                                                                                                                                                                                                                                                                                                                                                                                                                                                                                                                                                                                                                                                                                                                                                                                                                                  |
| EPI_ISL_6761106                                                                                                                                                                                                                                                                                                                                                                                                                                                                                                                                                                                                                                                                                                                                                                                                                                                                                                                                                                                                                                                             | Macha Research Trust                                                           | Macha Research Trust                                                                                                       | Kalonda A; Katowa B; Matoba J; Mubemba B; Muleya W; Simulundu E                                                                                                                                                                                                                                                                                                                                                                                                                                                                                                                                                                                                                                                                                                                                                                                                                                                                                                  |
| EPI_ISL_1372784, EPI_ISL_1973049, EPI_ISL_2245490, EPI_ISL_3544503, EPI_ISL_4760110, EPI_ISL_5366895, EPI_ISL_6533187                                                                                                                                                                                                                                                                                                                                                                                                                                                                                                                                                                                                                                                                                                                                                                                                                                                                                                                                                       | see above                                                                      | Maine Health and Environmental Testing Laboratory                                                                          | Tewhey Lab, The Jackson Laboratory                                                                                                                                                                                                                                                                                                                                                                                                                                                                                                                                                                                                                                                                                                                                                                                                                                                                                                                               |
| EPI_ISL_2441039, EPI_ISL_2450902, EPI_ISL_2450928, EPI_ISL_2488968, EPI_ISL_2786452, EPI_ISL_3065076, EPI_ISL_3065229, EPI_ISL_3065245, EPI_ISL_3110607, EPI_ISL_3428470, EPI_ISL_3603218, EPI_ISL_3603370, EPI_ISL_3604247, EPI_ISL_3864488, EPI_ISL_3865141, EPI_ISL_4196421, EPI_ISL_4259520, EPI_ISL_4343113, EPI_ISL_4925329, EPI_ISL_5154378, EPI_ISL_5318328, EPI_ISL_6255945, EPI_ISL_6256688, EPI_ISL_6309905, EPI_ISL_6310939, EPI_ISL_6310959, EPI_ISL_6400318, EPI_ISL_6652792, EPI_ISL_6697864, EPI_ISL_6811290, EPI_ISL_6811987, EPI_ISL_6887472, EPI_ISL_6897163, EPI_ISL_7152743, EPI_ISL_7152820, EPI_ISL_7330236, EPI_ISL_7330408, EPI_ISL_7330545, EPI_ISL_7330938, EPI_ISL_7499739, EPI_ISL_7499823, EPI_ISL_7500089, EPI_ISL_7500437, EPI_ISL_7616258, EPI_ISL_7616263, EPI_ISL_7617200, EPI_ISL_7652558, EPI_ISL_7653548, EPI_ISL_8079274, EPI_ISL_8128425, EPI_ISL_8129861, EPI_ISL_8129888, EPI_ISL_8129903, EPI_ISL_8129940, EPI_ISL_8157858, EPI_ISL_8157906, EPI_ISL_8309379, EPI_ISL_8310226, EPI_ISL_8520489, EPI_ISL_8714610, EPI_ISL_8716339 | see above                                                                      | Mako Medical                                                                                                               | Centers for Disease Control and Prevention Division of Viral Diseases, Pathogen Discovery                                                                                                                                                                                                                                                                                                                                                                                                                                                                                                                                                                                                                                                                                                                                                                                                                                                                        |
| EPI_ISL_5538216                                                                                                                                                                                                                                                                                                                                                                                                                                                                                                                                                                                                                                                                                                                                                                                                                                                                                                                                                                                                                                                             | Manila Doctors Hospital                                                        | Philippine Genome Center                                                                                                   | Adrian Paskey; Benjamin Rambo-Martin; Christopher Gulwick; Clinton Paden; Clinton R. Paden; Dakota Howard; Darlene Wagner; Dhwani Batra; Duncan MacCannell; Erisa Sula; Jason Caravas; Kara Moser; Kristine Lacey; Lauren Moon; Matthew Schmerer; Matthew Tugwell; Peter Cook; Peter W. Cook; Scott Sammons; Shatavia Morrison; Tymekia Kendall; Victoria Caban Figueroa; Yvette Unoarumhi                                                                                                                                                                                                                                                                                                                                                                                                                                                                                                                                                                       |
|                                                                                                                                                                                                                                                                                                                                                                                                                                                                                                                                                                                                                                                                                                                                                                                                                                                                                                                                                                                                                                                                             |                                                                                |                                                                                                                            | Barter, M.; Dewey, H.; H. and Tewhey, R.; Iosue, F.; Lynch, R.; Matluk, N.; Mungler                                                                                                                                                                                                                                                                                                                                                                                                                                                                                                                                                                                                                                                                                                                                                                                                                                                                              |
|                                                                                                                                                                                                                                                                                                                                                                                                                                                                                                                                                                                                                                                                                                                                                                                                                                                                                                                                                                                                                                                                             |                                                                                |                                                                                                                            | Alethea R. de Guzman; Anna Ong-Lim; Arienne A. Zamora; Benedict A. Maralit; Carlo M. Lapid; Celia Carlos; Cynthia P. Saloma; Devon Ray Pacial; Diomedes A. Cariño; Edsel Maurice Salvana; El King D. Morado; Elcid Aaron R. Pangilinan; Eva Maria Cutiungco-de la Paz; Francis A. Tablizo; Henrietta Marie Rodriguez; Jaime C. Montoya; Jan Michael C. Yap; Jarvin E. Nipales; Jo-Hannah S. Llamas; John Q. Wong; Joshua Jose Endozo; Juan Antonio R. Magalang; Karol Sophia Agape R. Padilla; Kris P. Punayan; Kristina Patriz Dela Cruz; Lindsay Clare D.L. Carandang; Ma. Exanil Plantig; Marc Edsel C. Ayes; Maria Rosario Singh-Vergeire; Maria Sofia L. Yangzon; Marielle M. Gamboa; Marissa Alejandria; Niña Francesca Bustamante; Razel Nikka M. Hao; Renato Jacinto Q. Mantaring; Rianna Patricia S. Cruz; Shiela Mae M. Araiza; Yvonne Valerie Austria; Zipporah Mariebelle R. Enriquez; Zyrel V. Mollejon                                             |

|                                                                                                                                                                                                                                                                                                                                                                                       |                                                                                                             |                                                                                                                                |                                                                                                                                                                                                                                                                                                                                                                                                                                                                                                                                                                                                                                                                                                                                                                                                                                                                                                                                                                                                           |
|---------------------------------------------------------------------------------------------------------------------------------------------------------------------------------------------------------------------------------------------------------------------------------------------------------------------------------------------------------------------------------------|-------------------------------------------------------------------------------------------------------------|--------------------------------------------------------------------------------------------------------------------------------|-----------------------------------------------------------------------------------------------------------------------------------------------------------------------------------------------------------------------------------------------------------------------------------------------------------------------------------------------------------------------------------------------------------------------------------------------------------------------------------------------------------------------------------------------------------------------------------------------------------------------------------------------------------------------------------------------------------------------------------------------------------------------------------------------------------------------------------------------------------------------------------------------------------------------------------------------------------------------------------------------------------|
| EPI_ISL_5568699                                                                                                                                                                                                                                                                                                                                                                       | Manuel J. Santos Hospital                                                                                   | Philippine Genome Center                                                                                                       | Alethea R. de Guzman; Alyssa Joyce E. Telles; Anna Ong-Lim; Arienne A. Zamora; Benedict A. Maralit; Carlo M. Lapid; Celia Carlos; Cynthia P. Saloma; Devon Ray Pacial; Diomedes A. Cariño; Edsel Maurice Salvaña; El King D. Morado; Elcid Aaron R. Pangilinan; Eva Maria Cutiongco-de la Paz; Francis A. Tablizo; Henrietta Marie Rodriguez; Jaime C. Montoya; Jan Michael C. Yap; Jarvin E. Nipales; Jo-Hannah S. Llames; John Michael Egana; John Q. Wong; Joshua Jose Endozo; Juan Antonio R. Magalang; Karol Sophia Agape R. Padilla; Kris P. Punayan; Kristina Patriz Dela Cruz; Lindsay Clare D.L. Carandang; Ma. Exanil Planting; Marc Edsel C. Ayes; Maria Rosario Singh-Vergeire; Maria Sofia L. Yangzon; Marielle M. Gamboa; Marissa Alejandria; Niña Francesca Bustamante; Razel Nikka M. Hao; Renato Jacinto Q. Mantaring; Rianna Patricia S. Cruz; Shiela Mae M. Araiza; Yvonne Valerie Austria; Zipporah Mariebelle R. Enriquez; Zryel V. Mollejon                                         |
| EPI_ISL_4715351, EPI_ISL_5546623, EPI_ISL_5569400, EPI_ISL_5570445, EPI_ISL_5570477                                                                                                                                                                                                                                                                                                   | Maria Reyna Xavier University Hospital                                                                      | Philippine Genome Center                                                                                                       | Alethea R. de Guzman; Alyssa Joyce E. Telles; Anna Ong-Lim; Arienne A. Zamora; Benedict A. Maralit; Carlo M. Lapid; Celia Carlos; Cynthia P. Saloma; Devon Ray Pacial; Diomedes A. Cariño; Edsel Maurice Salvaña; El King D. Morado; Elcid Aaron R. Pangilinan; Eva Maria Cutiongco-de la Paz; Francis A. Tablizo; Henrietta Marie Rodriguez; Jaime C. Montoya; Jan Michael C. Yap; Jarvin E. Nipales; Jo-Hannah S. Llames; John Michael Egana; John Q. Wong; Joshua Gregor A. Dizon; Joshua Jose Endozo; Juan Antonio R. Magalang; Karol Sophia Agape R. Padilla; Kenneth M. Kim; Kris P. Punayan; Kristina Patriz Dela Cruz; Lindsay Clare D.L. Carandang; Ma. Exanil Planting; Marc Edsel C. Ayes; Maria Rosario Singh-Vergeire; Maria Sofia L. Yangzon; Marielle M. Gamboa; Marissa Alejandria; Niña Francesca Bustamante; Razel Nikka M. Hao; Renato Jacinto Q. Mantaring; Rianna Patricia S. Cruz; Shiela Mae M. Araiza; Yvonne Valerie Austria; Zipporah Mariebelle R. Enriquez; Zryel V. Mollejon |
| EPI_ISL_5545224                                                                                                                                                                                                                                                                                                                                                                       | Mariano Marcos Memorial Hospital Medical Center                                                             | Philippine Genome Center                                                                                                       | Alethea R. de Guzman; Anna Ong-Lim; Arienne A. Zamora; Benedict A. Maralit; Carlo M. Lapid; Celia Carlos; Cynthia P. Saloma; Devon Ray Pacial; Diomedes A. Cariño; Edsel Maurice Salvaña; El King D. Morado; Elcid Aaron R. Pangilinan; Eva Maria Cutiongco-de la Paz; Francis A. Tablizo; Henrietta Marie Rodriguez; Jaime C. Montoya; Jan Michael C. Yap; Jarvin E. Nipales; Jo-Hannah S. Llames; John Q. Wong; Joshua Gregor A. Dizon; Juan Antonio R. Magalang; Karol Sophia Agape R. Padilla; Kenneth M. Kim; Kris P. Punayan; Kristina Patriz Dela Cruz; Lindsay Clare D.L. Carandang; Ma. Exanil Planting; Marc Edsel C. Ayes; Maria Rosario Singh-Vergeire; Maria Sofia L. Yangzon; Marielle M. Gamboa; Marissa Alejandria; Niña Francesca Bustamante; Razel Nikka M. Hao; Renato Jacinto Q. Mantaring; Rianna Patricia S. Cruz; Shiela Mae M. Araiza; Yvonne Valerie Austria; Zipporah Mariebelle R. Enriquez; Zryel V. Mollejon                                                                 |
| EPI_ISL_4061754, EPI_ISL_4743938                                                                                                                                                                                                                                                                                                                                                      | Marshfield Clinic Labs                                                                                      | Marshfield Clinic Research Institute - Integrated Research and Development Laboratory                                          | Adam Bissonnette; Cody DeHamer; Jen K. Meece; Mary Stemper; Nidhi Mehta; Sherri Guzinski; Thao Le                                                                                                                                                                                                                                                                                                                                                                                                                                                                                                                                                                                                                                                                                                                                                                                                                                                                                                         |
| EPI_ISL_2859690                                                                                                                                                                                                                                                                                                                                                                       | Mary Mediatrix Medical Center                                                                               | Philippine Genome Center                                                                                                       | Alethea R. de Guzman; Anna Ong-Lim; Arienne A. Zamora; Benedict A. Maralit; Carlo M. Lapid; Celia Carlos; Devon Ray Pacial; Diomedes A. Carino; Edsel Maurice Salvaña; El King D. Morado; Elcid Aaron R. Pangilinan; Eva Maria Cutiongco-de la Paz; Francis A. Tablizo; Henrietta Marie Rodriguez; Jaime C. Montoya; Jan Michael C. Yap; Jarvin E. Nipales; Jo-Hannah S. Llames; John Q. Wong; Joshua Gregor A. Dizon; Juan Antonio R. Magalang; Karol Sophia Agape R. Padilla; Kenneth M. Kim; Kris P. Punayan; Kristina Patriz Dela Cruz; Lindsay Claire D.L. Carandang; Ma. Exanil Planting; Marc Edsel C. Ayes; Maria Rosario Singh-Vergeire and Cynthia P. Saloma; Maria Sofia L. Yangzon; Marielle M. Gamboa; Marissa Alejandria; Niña Francesca Bustamante; Razel Nikka M. Hao; Renato Jacinto Q. Mantaring; Rianna Patricia S. Cruz; Shiela Mae M. Araiza; Yvonne Valerie Austria; Zipporah Mariebelle R. Enriquez; Zryel V. Mollejon                                                             |
| EPI_ISL_1348315, EPI_ISL_1500282, EPI_ISL_1706185, EPI_ISL_1922655, EPI_ISL_3011826, EPI_ISL_3549892, EPI_ISL_4463555, EPI_ISL_4469099, EPI_ISL_4664263, EPI_ISL_5640335, EPI_ISL_8974166                                                                                                                                                                                             | see above                                                                                                   | Maryland Genomics, Institute for Genome Sciences, University of Maryland School of Medicine                                    | Aditya; Claire M; Fraser; George; Hazen; Holly; Humphrys; Ivette; Jacques; Jain; Jonathan; Kevin; Kranthi; Lim; Lisa D; Luke J; Mehta; Mike; Ott; Ravel; Regan; Roussey; Sadzewicz; Sandra; Santana-Cruz; Tallon; Tracy; Vavikolanu                                                                                                                                                                                                                                                                                                                                                                                                                                                                                                                                                                                                                                                                                                                                                                       |
| EPI_ISL_677063                                                                                                                                                                                                                                                                                                                                                                        | Masonic Medical Research Institute                                                                          | Wadsworth Center, New York State Department of Health                                                                          | Alexis Russel; Daryl M. Lamson; Erasmus Schneider; Erica Lasek-Nesselquist; John Kelly; Jonathan Pitnick; Kirsten St. George; Nathan Tucker; Navjot Singh; Sara Griesemer                                                                                                                                                                                                                                                                                                                                                                                                                                                                                                                                                                                                                                                                                                                                                                                                                                 |
| EPI_ISL_3937475                                                                                                                                                                                                                                                                                                                                                                       | Mass General Brigham                                                                                        | Infectious Disease Program, Broad Institute of Harvard and MIT                                                                 | A.E.; Adams, G.; Anahar, M.; B.L.; B.W.; Bauer, M.; Birren; Branda, J.; Carter, A.; Cerrato, F.; Chaluvadi, S.; Chapman; Cusick, C. D.J.; DeRuff, K.; E. and Sabeti; Flowers, K.; Gallagher, G.; Gladden-Young, A.; Gnirke, A.; Harris, J.; J.E.; K.J.; LaRoque, R.; Lagerborg, K.; Lemieux; Lin; Loreth, C.; MacInnis; Neumann, A.; Normandin, E.; P.C.; Park; Pierce, V.; Reilly, S.; Rosenberg; Rudy, M.; Ryan, E.; S.B.; Shaw, B.; Siddle; Slater, D.; Smole, S.; Tomkins-Tinch, C.; Turbett, S.                                                                                                                                                                                                                                                                                                                                                                                                                                                                                                      |
| EPI_ISL_460102, EPI_ISL_1121762                                                                                                                                                                                                                                                                                                                                                       | Massachusetts General Hospital                                                                              | Infectious Disease Program, Broad Institute of Harvard and MIT                                                                 | A.E.; Adams, G.; Anahar, M.; B.L.; B.W.; Bauer, M.; Birren; Branda, J.; Carter, A.; Cerrato, F.; Chaluvadi, S.; Chapman; Cusick, C. D.J.; DeRuff, K.; E. and Sabeti; Flowers, K.; Gallagher, G.; Gladden-Young, A.; Gnirke, A.; Harris, J.; J.E.; K.J.; LaRoque, R.; Lagerborg, K.; Lemieux; Lin; Loreth, C.; MacInnis; Neumann, A.; Normandin, E.; P.C.; Park; Pierce, V.; Reilly, S.; Rosenberg; Rudy, M.; Ryan, E.; S.B.; Sabeti; Shaw, B.; Siddle; Slater, D.; Smole, S.; Tomkins-Tinch, C.; Turbett, S.                                                                                                                                                                                                                                                                                                                                                                                                                                                                                              |
| EPI_ISL_9428902, EPI_ISL_4553038                                                                                                                                                                                                                                                                                                                                                      | Massachusetts State Public Health Lab                                                                       | Massachusetts State Public Health Lab                                                                                          | Andrew Lang; Glen Gallagher; Sandra Smole; Timelia Fink                                                                                                                                                                                                                                                                                                                                                                                                                                                                                                                                                                                                                                                                                                                                                                                                                                                                                                                                                   |
| EPI_ISL_2095249                                                                                                                                                                                                                                                                                                                                                                       | Max von Pettenkofer Institute, Virology, National Reference Center for Retroviruses, LMU Munich             | Massachusetts State Public Health Laboratory                                                                                   | Andrew Lang; Glen Gallagher; Sandra Smole; Timelia Fink                                                                                                                                                                                                                                                                                                                                                                                                                                                                                                                                                                                                                                                                                                                                                                                                                                                                                                                                                   |
| EPI_ISL_3869471                                                                                                                                                                                                                                                                                                                                                                       | MedLab Central Ltd                                                                                          | Laboratory for Functional Genome Analysis; Dept. Genomics; Gene Center of the LMU Munich                                       | Alexander Graf; Helmut Blum; Max Muenchhoff; Oliver Keppler; Stefan Krebs                                                                                                                                                                                                                                                                                                                                                                                                                                                                                                                                                                                                                                                                                                                                                                                                                                                                                                                                 |
| EPI_ISL_5307837                                                                                                                                                                                                                                                                                                                                                                       | Medica                                                                                                      | Institute of Environmental Science and Research (ESR)                                                                          | Anja Werno; Antje van der Linden; Arlo Upton; Chris Mansell; David Hammer; Dragana Drinkovic; Erasmus Smit; Gary McAuliffe; Hana Sofia Andersson; Hermes Perez; James Ussher; Jill Sherwood; Jing Wang; Joep de Ligt; Josh Freeman; Julia Howard; Juliet Elvy; Lauren Jelly; Mary DeAlmeida; Matt Blakiston; Matt Storey; Matthew Rogers; Max Bloomfield; Michael Addidge; Michelle Balm; Muhammad Faisal; Nikki Freed; Olin Silander; Olivia Stroeven; Rachel Boyle; Sally Roberts; SallyAnn Harbison; Sarah Jefferies; Sharmini Muttaiyah; Susan Morpeth; Susan Taylor; Timothy Blackmore; Vani Sathyendran; Veronica Playle; Virginia Hope; Xiaoyun Ren                                                                                                                                                                                                                                                                                                                                                |
| EPI_ISL_5587831                                                                                                                                                                                                                                                                                                                                                                       | Medical Center of Taguig City, Inc.                                                                         | Philippine Genome Center                                                                                                       | Alethea R. de Guzman; Alyssa Joyce E. Telles; Anna Ong-Lim; Arienne A. Zamora; Benedict A. Maralit; Carlo M. Lapid; Celia Carlos; Cynthia P. Saloma; Devon Ray Pacial; Diomedes A. Cariño; Edsel Maurice Salvaña; El King D. Morado; Elcid Aaron R. Pangilinan; Eva Maria Cutiongco-de la Paz; Francis A. Tablizo; Henrietta Marie Rodriguez; Jaime C. Montoya; Jan Michael C. Yap; Jarvin E. Nipales; Jo-Hannah S. Llames; John Michael Egana; John Q. Wong; Joshua Jose Endozo; Juan Antonio R. Magalang; Karol Sophia Agape R. Padilla; Kris P. Punayan; Kristina Patriz Dela Cruz; Lindsay Clare D.L. Carandang; Ma. Exanil Planting; Marc Edsel C. Ayes; Maria Rosario Singh-Vergeire; Maria Sofia L. Yangzon; Marielle M. Gamboa; Marissa Alejandria; Niña Francesca Bustamante; Razel Nikka M. Hao; Renato Jacinto Q. Mantaring; Rianna Patricia S. Cruz; Shiela Mae M. Araiza; Yvonne Valerie Austria; Zipporah Mariebelle R. Enriquez; Zryel V. Mollejon                                         |
| EPI_ISL_515830, EPI_ISL_515841                                                                                                                                                                                                                                                                                                                                                        | Medical Disagnotics Services (MDS)                                                                          | KRISP, KZN Research Innovation and Sequencing Platform                                                                         | Chimkangarab; Giandhari J; Khan S; Lessells R; Mdlalose K; Pillay S; Tegally H; Wilkinson E; York D; de Oliveira T                                                                                                                                                                                                                                                                                                                                                                                                                                                                                                                                                                                                                                                                                                                                                                                                                                                                                        |
| EPI_ISL_5829673, EPI_ISL_5917671, EPI_ISL_5917734, EPI_ISL_5917742, EPI_ISL_5918250, EPI_ISL_5918264, EPI_ISL_5918277, EPI_ISL_5918340, EPI_ISL_5918353, EPI_ISL_5918383, EPI_ISL_5918447, EPI_ISL_5920624, EPI_ISL_5921082, EPI_ISL_5921222, EPI_ISL_6000360, EPI_ISL_6000482, EPI_ISL_6157705, EPI_ISL_6157783, EPI_ISL_6194301, EPI_ISL_6194715, EPI_ISL_6195952, EPI_ISL_6196188, | see above                                                                                                   | Medical Genetics Laboratory, Regional Centre of Medical Genetics, Emergency County Hospital Craiova                            | Adina Dragos; Ana-Maria Buga; Anca-Lelia (Riza) Costache; Andrei Pirvu; Elena Plesea; Ioana Streata; Mihai Cucu; Mihai Ioana; Monica Cara; Razvan Plesea; Stefania Dorobantu                                                                                                                                                                                                                                                                                                                                                                                                                                                                                                                                                                                                                                                                                                                                                                                                                              |
| EPI_ISL_1347195                                                                                                                                                                                                                                                                                                                                                                       | Medical Laboratories Duesseldorf                                                                            | Center of Medical Microbiology, Virology, and Hospital Hygiene, University of Duesseldorf                                      | Alexander Dilthey; Andreas Walker; Angelika Helmer; Christian Lange; Daniel Strelow; Jessica Nicolai; Jörg Timm; Klaus Pfeffer; Lisanna Hülse; Malte Kohns Vasconcelos; Maximilian Damagnez; Nadine Lübke; Tobias Wienemann; Torsten Houwaart                                                                                                                                                                                                                                                                                                                                                                                                                                                                                                                                                                                                                                                                                                                                                             |
| EPI_ISL_1251601, EPI_ISL_3320819, EPI_ISL_4739855                                                                                                                                                                                                                                                                                                                                     | Medical Microbiology Unit, Department for Laboratory Medicine, Drammen Hospital, Vestre Viken Health Trust, | Norwegian Institute of Public Health, Department of Virology                                                                   | Atiya R Ali; Debecch Nadia; Engebretsen Serina Beate; Garcia Llorente Ignacio; Hilde Elshaug; Hilde Vollan; Jon Bråte; Kamilla Heddeland Insteffjord; Karoline Bragstad; Kathrine Stene-Johansen; Line Victoria Moen; Marie Paulsen Madsen; Olav Hungnes; Pedersen Benedikte Nevjen; Rasmus Riis Kopperud                                                                                                                                                                                                                                                                                                                                                                                                                                                                                                                                                                                                                                                                                                 |
| EPI_ISL_3183745, EPI_ISL_7090951, EPI_ISL_7091034                                                                                                                                                                                                                                                                                                                                     | Medical Microbiology and Zoology Section, Okinawa Prefectural Institute of Health and Environment           | Medical Microbiology and Zoology Section, Okinawa Prefectural Institute of Health and Environment                              | Hisako Kyan; Kentaro Itokawa; Makoto Kuroda; Masanori Hashino; Minoru Nidaira; Noriyuki Maeshiro; Rina Tanaka; Taketoshi Takara; Tetsuya Kakita; Tsuyoshi Kudeken; Tsuyoshi Sekizuka; Yumani Kuba                                                                                                                                                                                                                                                                                                                                                                                                                                                                                                                                                                                                                                                                                                                                                                                                         |
| EPI_ISL_4225466, EPI_ISL_2129037, EPI_ISL_2112808                                                                                                                                                                                                                                                                                                                                     | Medizinisch-Diagnostisches Labor Kempten allgäulab                                                          | Robert Koch Institute                                                                                                          |                                                                                                                                                                                                                                                                                                                                                                                                                                                                                                                                                                                                                                                                                                                                                                                                                                                                                                                                                                                                           |
| EPI_ISL_1722115                                                                                                                                                                                                                                                                                                                                                                       | Medizinisches Labor Ostsachsen MVZ GbR Nebenbetriebsstätte Dresden                                          | Robert Koch Institute                                                                                                          |                                                                                                                                                                                                                                                                                                                                                                                                                                                                                                                                                                                                                                                                                                                                                                                                                                                                                                                                                                                                           |
| EPI_ISL_2815327                                                                                                                                                                                                                                                                                                                                                                       | Melaka Hospital                                                                                             | Institute for Medical Research, Infectious Disease Research Centre, National Institutes of Health, Ministry of Health Malaysia | Azizan MA; Kamel K; Mohd Zawawi Z; Ramiy N; Robert F; Suppiah J; Thayan R                                                                                                                                                                                                                                                                                                                                                                                                                                                                                                                                                                                                                                                                                                                                                                                                                                                                                                                                 |
| EPI_ISL_577591, EPI_ISL_708261, EPI_ISL_1233774, EPI_ISL_1461579, EPI_ISL_1905206, EPI_ISL_1906737, EPI_ISL_1994228, EPI_ISL_2374686, EPI_ISL_3129032                                                                                                                                                                                                                                 | see above                                                                                                   | Michigan Department of Health and Human Services, Bureau of Laboratories                                                       | Blankenship HM; Riner D; Soehnlén MK                                                                                                                                                                                                                                                                                                                                                                                                                                                                                                                                                                                                                                                                                                                                                                                                                                                                                                                                                                      |
| EPI_ISL_521077, EPI_ISL_565108, EPI_ISL_565281, EPI_ISL_593112, EPI_ISL_640580, EPI_ISL_641291, EPI_ISL_663567, EPI_ISL_663739                                                                                                                                                                                                                                                        | see above                                                                                                   | Microbiological Diagnostic Unit - Public Health Laboratory (MDU-PHL)                                                           | M. B.; M.L.; N.L.; Sait; Sait, M.; Schultz; Schultz M.; Schultz M.B.; Seemann T.; Seemann, T.; Sherry; Sherry, N.                                                                                                                                                                                                                                                                                                                                                                                                                                                                                                                                                                                                                                                                                                                                                                                                                                                                                         |
| EPI_ISL_6589959, EPI_ISL_7770930, EPI_ISL_7771867, EPI_ISL_8640204, EPI_ISL_8640874                                                                                                                                                                                                                                                                                                   | Microbiological Diagnostic Unit - Public Health Laboratory (MDU-PHL)                                        | Microbiological Diagnostic Unit - Public Health Laboratory (MDU-PHL)                                                           | Horan, K.; N.L.; Seemann, T.; Sherry                                                                                                                                                                                                                                                                                                                                                                                                                                                                                                                                                                                                                                                                                                                                                                                                                                                                                                                                                                      |
| EPI_ISL_5195551                                                                                                                                                                                                                                                                                                                                                                       | Microbiology Department & Molecular Biology CORE   CDB   Hospital Clinic   Barcelona                        | Microbiology Department & Molecular Biology CORE   CDB   Hospital Clinic   Barcelona                                           | Andrea Vergara Gomez   Jose Luis Villanueva Canas   Miguél Julian Martinez Yoldi   M. Mar Mosquera Gutierrez   M. Angeles Marcos Maeso                                                                                                                                                                                                                                                                                                                                                                                                                                                                                                                                                                                                                                                                                                                                                                                                                                                                    |
| EPI_ISL_2926088, EPI_ISL_3320271, EPI_ISL_3817500, EPI_ISL_7381270, EPI_ISL_7900622                                                                                                                                                                                                                                                                                                   | Microbiology Department, Laboratori Clinic Metropolitana Nord. Hospital Universitari Germans Trias i Pujol  | Can Ruti SARS-CoV-2 Sequencing Hub (HUGTIP/IrsiCaixa/IGTP)                                                                     | Alba Sánchez; Alexia París; Ana Blanco; Anna Not; Antoni E Bordoy; Bonaventura Clotet; Cristina Casañ; David Panisello; Francesc Catala-Moll; Gemma Clara; Ignacio Blanco; Laia Soler; Lauro Sumoy; Marc Noguera-Julian; Maria Casadella; Mariona Parera; Mercedes Guerrero; Montserrat Giménez; Pere-Joan Cardona; Pilar Armengol; Roger Paredes; Verónica Saludes; and Elisa Martró on behalf of the Can Ruti SARS-CoV-2 Sequencing Hub                                                                                                                                                                                                                                                                                                                                                                                                                                                                                                                                                                 |
| EPI_ISL_4360827                                                                                                                                                                                                                                                                                                                                                                       | Microbiology Department, Laboratori Clinic Metropolitana Nord. Hospital Universitari Germans Trias i Pujol  | IrsiCaixa                                                                                                                      | Anna Not; Antoni E Bordoy; Bonaventura Clotet; Cristina Casañ; David Panisello; Francesc Català-Moll; Gemma Clara; Ignacio Blanco; Laia Soler; Laura Muntaner; Marc Noguera-Julian; Mercedes Guerrero; Montserrat Giménez; Pere-Joan Cardona; Roger Paredes; Verónica Saludes; and Elisa Martró                                                                                                                                                                                                                                                                                                                                                                                                                                                                                                                                                                                                                                                                                                           |
| EPI_ISL_1208536, EPI_ISL_1251182, EPI_ISL_1263448, EPI_ISL_1893015                                                                                                                                                                                                                                                                                                                    | Microbiology Department, Laboratori Clinic Metropolitana Nord. Hospital Universitari Germans Trias i Pujol. | Can Ruti SARS-CoV-2 Sequencing Hub (HUGTIP/IrsiCaixa/IGTP)                                                                     | Alba Sánchez; Anna Not; Antoni E Bordoy; Bonaventura Clotet; Carol Galvez Maria Casadellà; Cristina Casañ; Cristina Esteban; Francesc Catala-Moll; Gemma Clara; Ignacio Blanco; Irina Pey; Jordi Barretna; Julia G Prado; Marc Noguera-Julian; Maria Casadellà; Mariona Parera; Mercedes Guerrero; Montserrat Giménez; Pere-Joan Cardona; Pilar Armengol; Roger Paredes; Verónica Saludes; and Elisa Martró on behalf of the Can Ruti SARS-CoV-2 Sequencing Hub.                                                                                                                                                                                                                                                                                                                                                                                                                                                                                                                                          |
| EPI_ISL_2228079, EPI_ISL_2332603, EPI_ISL_2756406, EPI_ISL_2756415, EPI_ISL_2774108, EPI_ISL_3631653, EPI_ISL_3665899, EPI_ISL_3832560, EPI_ISL_5013319, EPI_ISL_5331923, EPI_ISL_5396385, EPI_ISL_5417298, EPI_ISL_6204405, EPI_ISL_6697579                                                                                                                                          | see above                                                                                                   | Microbiology Department, University Hospital Donostia                                                                          | Cilla G.; Gomez M; Grandioso D; Marimon JM; Martin-Peñaranda T; Montes M; Piñeiro L; Sorraín A                                                                                                                                                                                                                                                                                                                                                                                                                                                                                                                                                                                                                                                                                                                                                                                                                                                                                                            |
| EPI_ISL_1055755                                                                                                                                                                                                                                                                                                                                                                       | Microbiology Department. Complejo Hospitalario Universitario de                                             | Microbiology Department. Complejo Hospitalario                                                                                 | Complejo Hospitalario Universitario de Vigo (CHUVI). Complejo Hospitalario Universitario de Santiago (CHUS); Microbiology Department                                                                                                                                                                                                                                                                                                                                                                                                                                                                                                                                                                                                                                                                                                                                                                                                                                                                      |





|                                                                                                                                                                                                                                                                                                                                   |                                                                                                               |                                                                                                                                                                                                                    |                                                                                                                                                                                                                                                                                                                                                                                                                                                          |
|-----------------------------------------------------------------------------------------------------------------------------------------------------------------------------------------------------------------------------------------------------------------------------------------------------------------------------------|---------------------------------------------------------------------------------------------------------------|--------------------------------------------------------------------------------------------------------------------------------------------------------------------------------------------------------------------|----------------------------------------------------------------------------------------------------------------------------------------------------------------------------------------------------------------------------------------------------------------------------------------------------------------------------------------------------------------------------------------------------------------------------------------------------------|
| EPI_ISL_1823944                                                                                                                                                                                                                                                                                                                   | NYC Department of Health and Mental Hygiene                                                                   | Centers for Disease Control and Prevention Division of Viral Diseases, Pathogen Discovery                                                                                                                          | Alison Laufer Halpin; Ben L. Rambo-Martin; Clinton R. Paden; Dakota Howard; Darlene Wagner; Dave Wentworth; Dhvani Batra; Jasmine Padilla; Justin Lee; Katie Dillon; Krista Queen; Kristen Knipe; Kristine Lacek; Mark Burroughs; Matthew Schmerer; Mill Sheth; Peter Cook; Sam Shepard; Sarah Nobles; Shoshona Le; Suxiang Tong; Vivien Dugan; Yvette Unoarumhi                                                                                         |
| EPI_ISL_1087289                                                                                                                                                                                                                                                                                                                   | NYU Langone Health                                                                                            | Departments of Pathology and Medicine, New York University School of Medicine                                                                                                                                      | Adriana Heguy; Christian Marier; Dacia Dimartino; Emily Guzman; Gael Westby; Guiqing Wang; Paolo Cotzia; Paul Zappile; Peter Meyn; Sitharam Ramaswami; Yutong Zhang                                                                                                                                                                                                                                                                                      |
| EPI_ISL_4876406                                                                                                                                                                                                                                                                                                                   | NZOZ Meditest Diagnostyka Medyczna                                                                            | Wojewodzka Stacja Sanitarno-Epidemiologiczna w Gorzowie Wielkopolskim                                                                                                                                              | Elzbieta Justynska; Klaudia Kobenzda-Wlodarczak; Patrycja Faberska and Marek Mago; Renata Siegel                                                                                                                                                                                                                                                                                                                                                         |
| EPI_ISL_625565                                                                                                                                                                                                                                                                                                                    | NaN                                                                                                           | Chan-Zuckerberg Biohub                                                                                                                                                                                             | CZB Cliahub Consortium                                                                                                                                                                                                                                                                                                                                                                                                                                   |
| EPI_ISL_2615137                                                                                                                                                                                                                                                                                                                   | Nacionaline visuomenes sveikatos prieziuros laboratorija                                                      | National Public Health Surveillance Laboratory                                                                                                                                                                     | Ana Steponkiene; Danas Baksa; Jelena Razmuk; Lukas Vasionis; Lukas Zemaitis; Migle Gabrielaite; Svajune Muralyte                                                                                                                                                                                                                                                                                                                                         |
| EPI_ISL_1960363, EPI_ISL_8675177                                                                                                                                                                                                                                                                                                  | Nacionalinis maisto ir veterinarijos rizikos vertinimo institutas                                             | National Public Health Surveillance Laboratory                                                                                                                                                                     | Ana Steponkiene; Danas Baksa; Jelena Razmuk; Lukas Vasionis; Lukas Zemaitis; Migle Gabrielaite; Svajune Muralyte                                                                                                                                                                                                                                                                                                                                         |
| EPI_ISL_2428900                                                                                                                                                                                                                                                                                                                   | Nacionalinis maisto ir veterinarijos rizikos vertinimo institutas                                             | Vilnius University Hospital Santaros Klinikos, Center of Laboratory Medicine                                                                                                                                       | Daniel Naumovas; Dovile Ezerskyte; Gytis Dudas; Ingrida Olendraite; Ligita Raugaite; Monika Katenaite; Rimvydas Norvilas                                                                                                                                                                                                                                                                                                                                 |
| EPI_ISL_2798565                                                                                                                                                                                                                                                                                                                   | Nacionālais medicīnas serviss - laboratorija, SIA                                                             | Riga East University Hospital, National Microbiology Reference Laboratory; Eurofins Genomics Europe Sequencing GmbH                                                                                                | Arzu Algulevia; Diāna Dušacka; Dārta Pūpola; Ilva Pole; Inita Balta; Jevgenijs Bodrenko; Jūlija Čevere; Nataļja Mīkena; Reinis Vangravs; Reinis Zeltmatis; Sergejs Nikišins; Ģirts Šķenders                                                                                                                                                                                                                                                              |
| EPI_ISL_5327952                                                                                                                                                                                                                                                                                                                   | Namibia Institute of Pathology LTD, Windhoek Central Hospital                                                 | CERI, Centre for Epidemic Response and Innoavtion, Stellenbosch University and KRISP, KZN Research Innovation and Sequencing Platform, UKZN.                                                                       | Andreas Shiningavamwe; Giandhari Jennifer; Iyaloo Constantinus; Naidoo Yeshnee; Nathalia IGarus-Oas; Nahafa Frans; Ndumbu Pentikainen; Pillay Sureshnee; San James; Tegally Houriyah; Tshiabuila Derek; Wilkinson Eduan; Yajna Ramphal; de Oliveira Tulio                                                                                                                                                                                                |
| EPI_ISL_3061804                                                                                                                                                                                                                                                                                                                   | Nastavni zavod za javno zdravstvo Primorsko- Goranske Županije                                                | Hrvatski zavod za javno zdravstvo                                                                                                                                                                                  | Irena Tabain; Ivana Ferencak                                                                                                                                                                                                                                                                                                                                                                                                                             |
| EPI_ISL_1805741                                                                                                                                                                                                                                                                                                                   | National Center for Communicable Diseases (NCCD) National Influenza Center                                    | National Center for Communicable Diseases (NCCD) National Influenza Center                                                                                                                                         | Ankhabayar S; Battur L; Bayasgalan N; Darmaa B; Hideka M; Khishigmunkh Ch; Mina N; Naranzul Ts; Nyamadawa P; Seichiro F; Shinji W; Tsogzolmaa G                                                                                                                                                                                                                                                                                                          |
| EPI_ISL_1233567                                                                                                                                                                                                                                                                                                                   | National Center for Infectious and Parasitic Diseases (NCIPD)                                                 | National Center for Infectious and Parasitic Diseases (NCIPD)                                                                                                                                                      | Alexiev et al                                                                                                                                                                                                                                                                                                                                                                                                                                            |
| EPI_ISL_2099355, EPI_ISL_2180206, EPI_ISL_2621294, EPI_ISL_2648102, EPI_ISL_2967071, EPI_ISL_3076805, EPI_ISL_4541218, EPI_ISL_4541372, EPI_ISL_4710056, EPI_ISL_4731511, EPI_ISL_5417367, EPI_ISL_5738921, EPI_ISL_5739234, EPI_ISL_6103728, EPI_ISL_6115825, EPI_ISL_7326391, EPI_ISL_7327153, EPI_ISL_7327382, EPI_ISL_7327507 | see above                                                                                                     | National Center of Infectious and Parasitic Diseases                                                                                                                                                               | Alexiev; Alexiev et al; Dimitrova; Dobrinov; Donchev; Grigorova I.; Grigorova L.; Hristova; Ivanov; Kantardjiev; Korsun; Philipova; Stoitsova; Stoykov; Trifonova                                                                                                                                                                                                                                                                                        |
| EPI_ISL_1415204, EPI_ISL_1544050                                                                                                                                                                                                                                                                                                  | National Centre For Cell Science                                                                              | National Centre For Cell Science - INSACOG                                                                                                                                                                         | Ajay Pillai; Alexraj Paul; INSACOG Consortium team; Manoj Kumar Bhat; Mitali Inamdaram; Mohak P Gujare; Shivang P. Bhanushali; Sonal Manik Chavan; Yogesh Shouche; Yogesh Shouche.                                                                                                                                                                                                                                                                       |
| EPI_ISL_2460484, EPI_ISL_2461414, EPI_ISL_2461492, EPI_ISL_2955653                                                                                                                                                                                                                                                                | National Centre for Disease Control (NCDC) Biotechnology Division, Delhi                                      | NCDC Delhi, Biotechnology Division INSACOG                                                                                                                                                                         | Hema Gogia; Hemlata Lal; Kalaiarasan Ponnusamy; Mahesh S Dhar; Manoj K Singh; Meena Datta; Partha Rakshit; Preeti Madan; Priyanka Singh; Radhakrishnan V. S.; Robin Marwal; Sandhya Kabra; Sujeet K Singh; Uma Sharma                                                                                                                                                                                                                                    |
| EPI_ISL_4460815, EPI_ISL_4569790                                                                                                                                                                                                                                                                                                  | National Centre for Disease Control (NCDC) Biotechnology Division, Delhi - INSACOG                            | NCDC Delhi, Biotechnology Division -INSACOG                                                                                                                                                                        | Hema Gogia; Hemlata Lal; Kalaiarasan Ponnusamy; Mahesh S Dhar; Manoj K Singh; Meena Datta; Partha Rakshit; Preeti Madan; Priyanka Singh; Radhakrishnan V. S.; Robin Marwal; Sandhya Kabra; Sujeet K Singh; Uma Sharma                                                                                                                                                                                                                                    |
| EPI_ISL_1909898                                                                                                                                                                                                                                                                                                                   | National Food and Veterinary Risk Assessment Institute (NMVRVI)                                               | National Public Health Surveillance Laboratory                                                                                                                                                                     | Ana Steponkiene; Danas Baksa; Jelena Razmuk; Lukas Vasionis; Lukas Zemaitis; Migle Gabrielaite; Svajune Muralyte                                                                                                                                                                                                                                                                                                                                         |
| EPI_ISL_1407100                                                                                                                                                                                                                                                                                                                   | National HIV Reference Laboratory, Ministry of Health, Public Health Institute of Malawi                      | KRISP, KZN Research Innovation and Sequencing Platform                                                                                                                                                             | Auld A; Chliima B; Chiwaula M; Emmanuel SJ; Giandhari J; Kaba M; Kampira E; Kasambara W; Kim L; Lessells R; Maida A; Mvula B; Mwangomba W; Naidoo Y; Panja L; Pillay S; Tegally H; Wadonda N; Wilkinson E; de Oliveira T                                                                                                                                                                                                                                 |
| EPI_ISL_4877005                                                                                                                                                                                                                                                                                                                   | National Health Laboratory Service, Kwazulu-Natal, South Africa                                               | CERI, Centre for Epidemic Response and Innoavtion, Stellenbosch University and KRISP, KZN Research Innovation and Sequencing Platform, UKZN.                                                                       | Giandhari Jennifer; Naidoo Yeshnee; Nokukhanya Mdlalose; Pillay Sureshnee; San James; Tegally Houriyah; Tshiabuila Derek; Wilkinson Eduan; Yajna Ramphal; de Oliveira Tulio                                                                                                                                                                                                                                                                              |
| EPI_ISL_3663523                                                                                                                                                                                                                                                                                                                   | National Health Laboratory Service, South Africa                                                              | KRISP, KZN Research Innovation and Sequencing Platform                                                                                                                                                             | Giandhari Jennifer; Naidoo Yeshnee; Pillay Sureshnee; San James; Tegally Houriyah; Tshabuila Derek; Wilkinson Eduan; Yajna Ramphal; de Oliveira Tulio                                                                                                                                                                                                                                                                                                    |
| EPI_ISL_2455504, EPI_ISL_4504012, EPI_ISL_4748292, EPI_ISL_4748295, EPI_ISL_4748306, EPI_ISL_4969163, EPI_ISL_5458749, EPI_ISL_6773790                                                                                                                                                                                            | see above                                                                                                     | National Hospital for Tropical Diseases                                                                                                                                                                            | H.Rogier van Doorn on behalf of the OUCRU COVID-19 research group; Le Van Duyet; Luu Thi Dieu Lien; Ngo Thi Thu Hang; Nguyen My Hanh; Nguyen Thi Hang; Nguyen Thi Hong Phuong; Nguyen Thi Hong Thuong; Nguyen Thi Kim Chi; Nguyen Thi Nhu Ha; Nguyen Thi Tam; Nguyen Thu Trang; Phan Ngoc Thach; Phan Manh Cuong; Thomas Kesteman; Tran Thi Van Dung; Trinh Cong Dien; Trinh Son Tung; Van Dinh Trang; Vu Ngoc Lien                                      |
| EPI_ISL_4891887                                                                                                                                                                                                                                                                                                                   | National Institute For Communicable Diseases Of The National Health Laboratory Service                        | National Institute for Communicable Diseases of the National Health Laboratory Service                                                                                                                             | Amoako DG; Bhiman JN; Everatt J; Ismail A; Mahlangu B; Mnguni A; Mohale T; Ntuli N; Scheepers C                                                                                                                                                                                                                                                                                                                                                          |
| EPI_ISL_1534706                                                                                                                                                                                                                                                                                                                   | National Institute Health Research and Development                                                            | National Institute of Health Research and Development                                                                                                                                                              | Agustinihsih; Arie Ardiansyah Nugraha; Fauzul Muna; Hana Aparsi Pawestri; Hartanti Dian Ikawati; Herna; Holy Arif Wibowo; Irene Lorinda Indalao; Kartika Dewi Puspa; Kindi Adam; Krisna Nur Andriana Pangesti; Natalie Laurencia Kipuw; Nelly Puspandari; Ni Ketut Susilari; Nike Susanti; Nurika Hariastuti; Reni Herman; Rinin Ramadhany; Subangkit; Tati Febriyanti; Triyani Soekarso; Uly Aile Nikmah; Vivi Setiawaty.; Yuni Rukminiati              |
| EPI_ISL_2447877                                                                                                                                                                                                                                                                                                                   | National Institute for Communicable Diseases of the National Health Laboratory Service                        | National Institute for Communicable Diseases of the National Health Laboratory Service                                                                                                                             | Amoako DG; Bhiman JN; Ismail A; Mahlangu B; Mohale T; Ntuli N; Scheepers C                                                                                                                                                                                                                                                                                                                                                                               |
| EPI_ISL_1910037, EPI_ISL_1910087                                                                                                                                                                                                                                                                                                  | National Institute for Food and Veterinary Risk Assessment (NMVRVI)                                           | National Public Health Surveillance Laboratory                                                                                                                                                                     | Ana Steponkiene; Danas Baksa; Jelena Razmuk; Lukas Vasionis; Lukas Zemaitis; Migle Gabrielaite; Svajune Muralyte                                                                                                                                                                                                                                                                                                                                         |
| EPI_ISL_408480, EPI_ISL_408482, EPI_ISL_408484                                                                                                                                                                                                                                                                                    | National Institute for Viral Disease Control and Prevention, China CDC                                        | National Institute for Viral Disease Control & Prevention, CCDC                                                                                                                                                    | Baoying Huang; Fei Ye; George F. Gao; Guizhen Wu; Huiping Yang; Jianan Xu; Li Zhao; Peihua Niu; Roujian Lu; Ti Liu; Wenbo Xu; Wenjie Tan; Wenjie Tan , Xiaoping Fu , Xiang Zhao , Wenling Wang , Peihua Niu , Roujian Lu; Wenling Wang; Xiang Zhao; Yanhong Sun , Baoying Huang , Li Zhao , Fei Ye , Wenbo Xu , George F. Gao , Guizhen Wu; Zhaoguo Wang                                                                                                 |
| EPI_ISL_434534                                                                                                                                                                                                                                                                                                                    | National Institute for Viral Disease Control and Prevention, China CDC                                        | National Institute for Viral Disease Control and Prevention, China CDC, Yunnan Provincial CDC                                                                                                                      | Baoying Huang; Fei Ye; Guizhen Wu; Huijuan Wang; Li Zhao; Peihua Niu; Roujian Lu; Wenjie Tan; Wenling Wang                                                                                                                                                                                                                                                                                                                                               |
| EPI_ISL_1447378                                                                                                                                                                                                                                                                                                                   | National Institute of Infectious Diseases (NIID)                                                              | National Institute of Infectious Diseases (NIID)                                                                                                                                                                   | Hideka Miura; Kentaro Itokawa; Kiyoko Okamoto; Kumiko Araki; Makoto Kuroda; Masanori Hashino; Rina Tanaka; Seichiro Fujisaki; Shinichiro Hirai; Tsuyoshi Sekizuka                                                                                                                                                                                                                                                                                        |
| EPI_ISL_1114771, EPI_ISL_1258440, EPI_ISL_3386649                                                                                                                                                                                                                                                                                 | National Institute of Infectious Diseases-Prof. Dr. Matei Bals Molecular Diagnostics Laboratory               | National Institute of Infectious Diseases-Prof. Dr. Matel Bals Molecular Diagnostics Laboratory                                                                                                                    | Andreea Tudor; Corina Casangiu; Dan Otelea; Ionelia Nicolae; Leontina Banica; Marius Surleac; Ovidiu Vlaicu; Petre Milu; Robert Hohan; Simona Paraschiv                                                                                                                                                                                                                                                                                                  |
| EPI_ISL_504182, EPI_ISL_1533852                                                                                                                                                                                                                                                                                                   | National Institute of Laboratory Medicine and Referral Center                                                 | Genomic Research Lab, BCSIR                                                                                                                                                                                        | A. K. M. Shamsuzzaman; Abu Sayeed Mohammad Mahmud; Arifa Akram; Ashish Kumar Ghosh; Barna Goswami; Eshrar Osman; Iffat Jahan; Mahmuda Yasmin; Md. Ahasan Habib; Md. Maruf Ahmed Molla; Md. Murshed Hasan Sarkar; Md. Saddam Hossain; Md. Salim Khan; Mohammad Mohi Uddin; Mohammad Samir Uzzaman; Salek Ahmed Sajib; Shahina Akter; Sheikh Md. Selim Al Din; Tanjina Akhter Banu; Tanjina Akhter Banu; Tarannum Taznin; Tasnim Nafisa; Utpal Chandra Ray |
| EPI_ISL_2323226, EPI_ISL_2380283, EPI_ISL_2491840                                                                                                                                                                                                                                                                                 | National Institute of Public Health                                                                           | Charles University, Faculty of Science, BIOCEV, OMICS Genomics                                                                                                                                                     | Blanka Hamplová; Ingrid Poláková; Jana Šmahelová; Jiří Novák; Magdalena Jančářová; Ruth Tachezy; Sebastian Cristian Treitli; Vladimír Hampel; Zoltán Fűssy; Štěpánka Hrdá                                                                                                                                                                                                                                                                                |
| EPI_ISL_2686303, EPI_ISL_6051277, EPI_ISL_8801593                                                                                                                                                                                                                                                                                 | National Institute of Public Health                                                                           | National Institute of Public Health                                                                                                                                                                                | Alexander Nagy; Dusan Trnka; Helena Jirincova; Jan Moskalyk; Jaromira Vecerova; Timotej Suri                                                                                                                                                                                                                                                                                                                                                             |
| EPI_ISL_2674226                                                                                                                                                                                                                                                                                                                   | National Institute of Public Health                                                                           | State Veterinary Institute Prague                                                                                                                                                                                  | A; Cernikov; H; J; Jirincova; L; M; Nagy; Stara; Suri; T; Vecerova                                                                                                                                                                                                                                                                                                                                                                                       |
| EPI_ISL_3031557                                                                                                                                                                                                                                                                                                                   | National Institute of Public Health                                                                           | Virology Unit, Institut Pasteur du Cambodge                                                                                                                                                                        | Cecile Troupin; Chau Darapheak; Chin Savuth; Erik A Karlsson; Kraing Sidonn; Leakhena Pum; Ly Sovann; Sophoanneded Rath; Veasna Duong; Yi Sengdoeurn                                                                                                                                                                                                                                                                                                     |
| EPI_ISL_4949195                                                                                                                                                                                                                                                                                                                   | National Institute of Public Health Burundi, WHO Burundi, ASLM Burundi, MRC/UVRI & LSHTM Uganda Research Unit | MRC/UVRI & LSHTM Uganda Research Unit, National Institute of Public Health Burundi, WHO Burundi, ASLM Burundi                                                                                                      | Alexis Niyomwungere; Anatole Nkeshimana; Blessing T. Marondera; Butoyi Pascal; Cassien Nduwimana; Dan Lule Bugembe; Eric Kezakarayagwa; Francine Kabatesi; Jean Baptiste Niyibigira; Jerome Ndaruhutse; Jerome Nkurunziza; Joseph Nyandwi; Kouadio Theodore Yao; Matthew Cotten; My V.T. Phan; Xavier Crespin                                                                                                                                            |
| EPI_ISL_6774217, EPI_ISL_6774387                                                                                                                                                                                                                                                                                                  | National Institute of Public Health NIH - National Research Institute                                         | 1. Tricity SARS-CoV-2 sequencing consortium: University of Gdansk, Medical University of Gdansk, Vaxican Ltd., Invicta Ltd. 2. National Institute of Public Health - National Institute of Hygiene, Warsaw, Poland | Celina Cybulska; Karolina Gackowska; Katarzyna Groth; Katarzyna Zacharczuk; Krystyna Bienkowska Szewczyk; Lukas Rabalski; Maciej Gryzbek; Maciej Kosinski; Magdalena Nowakowska; Marcin Lubocki; Malgorzata Sadkowska-Todys; Tomasz Wolkowicz                                                                                                                                                                                                            |
| EPI_ISL_1260793                                                                                                                                                                                                                                                                                                                   | National Laboratory for Health, Environment and Food                                                          | Department for Public Health Microbiology Ljubljana, National Laboratory for Health, Environment and Food                                                                                                          | Jose Goncalves; Katarina Proscenc Trilar; Marija Trkov; Martin Bosilj; Metka Paragi; Tom Kortnik; Verica MIOC                                                                                                                                                                                                                                                                                                                                            |
| EPI_ISL_1491189                                                                                                                                                                                                                                                                                                                   | National Laboratory for Health, Environment and Food, OMM, Celje                                              | CISLD (Clinical Institute of Special Laboratory Diagnostics), University Children's Hospital, University Medical Center Ljubljana                                                                                  | Ana Grom; Barbara Jenko Bizjan; Jernej Kovač; Katarina Kozmos; Marko Pokorn; Maruša Debeljak; Robert Šket; Tadej Battelino; Tine Tesovnik                                                                                                                                                                                                                                                                                                                |
| EPI_ISL_2273271, EPI_ISL_7262947                                                                                                                                                                                                                                                                                                  | National Laboratory for Health, Environment and Food, OMM, Celje                                              | NLZOH (National Laboratory for Health, Environment and Food) / CISLD (Clinical Institute of Special Laboratory Diagnostics), University Children's Hospital, University Medical Center Ljubljana                   | Aleksander Kocuvan; Aleksander Mahnic; Alenka Storman; Ana Grom; Barbara Jenko Bizjan; Daša Kavka / Jernej Kovač; Kaja Tominc; Katarina Kozmos; Maja Rupnik; Marko Pokorn; Maruša Debeljak; Mateja Borinc; Maša Jarčič; Nika Gobec; Robert Šket; Sandra Janežic; Tadej Battelino; Tine Tesovnik; Tjasa Žohar Cretnik; Tjaša Žohar Cretnik                                                                                                                |
| EPI_ISL_1240551, EPI_ISL_1266392                                                                                                                                                                                                                                                                                                  | National Laboratory for Health, Environment and Food, OMM, Koper                                              | CISLD (Clinical Institute of Special Laboratory Diagnostics), University Children's Hospital,                                                                                                                      | Ana Grom; Barbara Jenko Bizjan; Jernej Kovač; Katarina Kozmos; Marko Pokorn; Maruša Debeljak; Robert Šket; Tadej Battelino; Tine Tesovnik                                                                                                                                                                                                                                                                                                                |

|                                                                                                                                                                                                                                                                                                                                                                                                                                                                                                           |                                                                                                                                 |                                                                                                                                                                                                                                         |                                                                                                                                                                                                                                                                                                                                                                                                                                                                                                                                                                                                                                                                                                                                                                                                                                                                                                                                                                                            |
|-----------------------------------------------------------------------------------------------------------------------------------------------------------------------------------------------------------------------------------------------------------------------------------------------------------------------------------------------------------------------------------------------------------------------------------------------------------------------------------------------------------|---------------------------------------------------------------------------------------------------------------------------------|-----------------------------------------------------------------------------------------------------------------------------------------------------------------------------------------------------------------------------------------|--------------------------------------------------------------------------------------------------------------------------------------------------------------------------------------------------------------------------------------------------------------------------------------------------------------------------------------------------------------------------------------------------------------------------------------------------------------------------------------------------------------------------------------------------------------------------------------------------------------------------------------------------------------------------------------------------------------------------------------------------------------------------------------------------------------------------------------------------------------------------------------------------------------------------------------------------------------------------------------------|
| EPI_ISL_1625361, EPI_ISL_3317001, EPI_ISL_3828941, EPI_ISL_7261784, EPI_ISL_8417329                                                                                                                                                                                                                                                                                                                                                                                                                       | National Laboratory for Health, Environment and Food, OMM, Koper                                                                | University Medical Center Ljubljana<br>NLZOH (National Laboratory for Health, Environment and Food) / CISLD (Clinical Institute of Special Laboratory Diagnostics), University Children's Hospital, University Medical Center Ljubljana | Aleksander Kocuvan; Aleksander Mahnic; Alenka Štorman; Ana Grom; Barbara Jenko Bizjan; Gašper Strugar; Kaja Tominc; Katarina Kozmos; Maja Rupnik; Marko Pokorn; Maruša Debeljak; Maša Jarčič; Mitja Rak / Jernej Kovač; Nika Gobec; Robert Šket; Sandra Janežic; Tadej Battelino; Tina Cvetković; Tine Tesovnik; Tjasa Zohar Čretnik; Tjaša Zohar Čretnik                                                                                                                                                                                                                                                                                                                                                                                                                                                                                                                                                                                                                                  |
| EPI_ISL_3316760, EPI_ISL_3316861                                                                                                                                                                                                                                                                                                                                                                                                                                                                          | National Laboratory for Health, Environment and Food, OMM, Kranj                                                                | NLZOH (National Laboratory for Health, Environment and Food) / CISLD (Clinical Institute of Special Laboratory Diagnostics), University Children's Hospital, University Medical Center Ljubljana                                        | Aleksander Kocuvan; Aleksander Mahnic; Alenka Štorman; Ana Grom; Barbara Jenko Bizjan; Kaja Tominc; Katarina Kozmos; Maja Rupnik; Marjana Petrevčič / Jernej Kovač; Marko Pokorn; Maruša Debeljak; Mateja Ravnik; Maša Jarčič; Monika Korošec; Nika Gobec; Robert Šket; Sandra Janežic; Tadej Battelino; Tine Tesovnik; Tjasa Zohar Čretnik                                                                                                                                                                                                                                                                                                                                                                                                                                                                                                                                                                                                                                                |
| EPI_ISL_1240315                                                                                                                                                                                                                                                                                                                                                                                                                                                                                           | National Laboratory for Health, Environment and Food, OMM, Maribor                                                              | CISLD (Clinical Institute of Special Laboratory Diagnostics), University Children's Hospital, University Medical Center Ljubljana                                                                                                       | Ana Grom; Barbara Jenko Bizjan; Jernej Kovač; Katarina Kozmos; Marko Pokorn; Maruša Debeljak; Robert Šket; Tadej Battelino; Tine Tesovnik                                                                                                                                                                                                                                                                                                                                                                                                                                                                                                                                                                                                                                                                                                                                                                                                                                                  |
| EPI_ISL_1625012, EPI_ISL_2162504, EPI_ISL_3316623, EPI_ISL_3829149, EPI_ISL_3829331, see above                                                                                                                                                                                                                                                                                                                                                                                                            | National Laboratory for Health, Environment and Food, OMM, Maribor                                                              | NLZOH (National Laboratory for Health, Environment and Food) / CISLD (Clinical Institute of Special Laboratory Diagnostics), University Children's Hospital, University Medical Center Ljubljana                                        | Aleksander Kocuvan; Aleksander Mahnic; Alenka Štorman; Ana Grom; Andrej Golle / Jernej Kovač; Barbara Jenko Bizjan; Kaja Tominc; Katarina Kozmos; Maja Rupnik; Marko Pokorn; Maruša Debeljak; Maša Jarčič; Mojca Cimerman; Nika Gobec; Nika Volmajer; Robert Šket; Sandra Janežic; Tadej Battelino; Tine Tesovnik; Tjasa Zohar Čretnik; Tjaša Zohar Čretnik                                                                                                                                                                                                                                                                                                                                                                                                                                                                                                                                                                                                                                |
| EPI_ISL_3601622                                                                                                                                                                                                                                                                                                                                                                                                                                                                                           | National Laboratory for Health, Environment and Food, OMM, Novo mesto                                                           | NLZOH (National Laboratory for Health, Environment and Food) / CISLD (Clinical Institute of Special Laboratory Diagnostics), University Children's Hospital, University Medical Center Ljubljana                                        | Aleksander Kocuvan; Aleksander Mahnic; Alenka Štorman; Ana Grom; Barbara Jenko Bizjan; David Cvetko; Kaja Tominc; Katarina Kozmos; Maja Rupnik; Marko Pokorn; Maruša Debeljak; Matjaž Retelj / Jernej Kovač; Maša Jarčič; Nika Gobec; Robert Šket; Sandra Janežic; Tadej Battelino; Tatjana Harlander; Tine Tesovnik; Tjasa Zohar Čretnik                                                                                                                                                                                                                                                                                                                                                                                                                                                                                                                                                                                                                                                  |
| EPI_ISL_1192040                                                                                                                                                                                                                                                                                                                                                                                                                                                                                           | National Microbiology Reference Laboratory                                                                                      | Quadram Institute Bioscience                                                                                                                                                                                                            | Agnes Juru; Ana-Victoria Gutierrez; Andrew J. Page; Andrew Tarupiwa; Charles Nyagupe; David Baker; Faustinos T Takawira; Gaetan Thilliez; Gemma Kay; Hlanai Gumbo; Justin O'Grady; Kenneth K Maeka; Leonardo de Oliveira Martins; Muchaneta Mugabe; Raiva Simbi; Robert Kingsley; Sekesai Zinyowera; Tapfumanei Mashe; Thanh Le Viet                                                                                                                                                                                                                                                                                                                                                                                                                                                                                                                                                                                                                                                       |
| EPI_ISL_6812920, EPI_ISL_6812921                                                                                                                                                                                                                                                                                                                                                                                                                                                                          | National Platform bis COVID ULB-IBC                                                                                             | National Platform bis COVID ULB-IBC                                                                                                                                                                                                     | Arnaud Marchant; Benoit Haerfingen; Coralie Henin; Marie-Luce Delforge; Ricardo De Mendonça                                                                                                                                                                                                                                                                                                                                                                                                                                                                                                                                                                                                                                                                                                                                                                                                                                                                                                |
| EPI_ISL_2483845                                                                                                                                                                                                                                                                                                                                                                                                                                                                                           | National Platform bis UMONS/Jolimont                                                                                            | National Platform bis UMONS/Jolimont                                                                                                                                                                                                    | Florian Juszcak; François Dufraes; Gautier Detry; Guillaume Bayon-Vicente; Ruddy Wattiez                                                                                                                                                                                                                                                                                                                                                                                                                                                                                                                                                                                                                                                                                                                                                                                                                                                                                                   |
| EPI_ISL_498566, EPI_ISL_645131, EPI_ISL_728195, EPI_ISL_803976, EPI_ISL_2349722, EPI_ISL_2508740, EPI_ISL_3007568, EPI_ISL_3052842, EPI_ISL_3087549, EPI_ISL_3730711, EPI_ISL_3737410, EPI_ISL_3784765, EPI_ISL_3784908, EPI_ISL_4271802, EPI_ISL_4762321, EPI_ISL_4762356, EPI_ISL_5421245, EPI_ISL_6015699, EPI_ISL_6268501, EPI_ISL_7566272, EPI_ISL_9076082, EPI_ISL_9233084, EPI_ISL_9233136, EPI_ISL_9233140                                                                                        | National Public Health Laboratory, National Centre for Infectious Diseases                                                      | National Public Health Laboratory, National Centre for Infectious Diseases                                                                                                                                                              | Benny Yeo; Chavatte JM; Cui L; Grace Jie Yin Ngan; Grace Ngan; Grace Ngan Jie Yin; Katherine Ching; Lin Cui; Lin RTP; Mak TM; Octavia S; Raymond Tzer Pin Lin; Royce Ang; Samuel Loo; Sophie Octavia; Tze Minn Mak; Yichen Ding; Zhenyang Zhou; Zhou Z                                                                                                                                                                                                                                                                                                                                                                                                                                                                                                                                                                                                                                                                                                                                     |
| EPI_ISL_1497522, EPI_ISL_1503200                                                                                                                                                                                                                                                                                                                                                                                                                                                                          | National Public Health Organization                                                                                             | National Public Health Organization                                                                                                                                                                                                     | Kyriaki Tryfinopoulou et al                                                                                                                                                                                                                                                                                                                                                                                                                                                                                                                                                                                                                                                                                                                                                                                                                                                                                                                                                                |
| EPI_ISL_2566078                                                                                                                                                                                                                                                                                                                                                                                                                                                                                           | National Reference Centre for Retroviruses, Medical School, University of Athens                                                | Central Public Health Lab, National Public Health Organization                                                                                                                                                                          | G.Magiorkinis et al                                                                                                                                                                                                                                                                                                                                                                                                                                                                                                                                                                                                                                                                                                                                                                                                                                                                                                                                                                        |
| EPI_ISL_9288145                                                                                                                                                                                                                                                                                                                                                                                                                                                                                           | National Virology Lab.                                                                                                          | SRC VB "Vector", "Collection of microorganisms" Department.                                                                                                                                                                             | Alexander N. Shvalov; Anastasiya M. Smirnova; Damira O.Ashyralieva; Kalila Zhumaleva.; Sergey A. Bodnev; Tatyana V. Tregubchak                                                                                                                                                                                                                                                                                                                                                                                                                                                                                                                                                                                                                                                                                                                                                                                                                                                             |
| EPI_ISL_8172253, EPI_ISL_671368                                                                                                                                                                                                                                                                                                                                                                                                                                                                           | National Virology Reference Laboratory<br>National Virus Reference Laboratory                                                   | Microbial Genomic Services<br>Irish Coronavirus Sequencing Consortium - Teagasc Moorepark                                                                                                                                               | Haziq Momin; Nor Azian Hafneh; Zainun Zaini<br>Calum Walsh; Fiona Crispie; John Kenny; Paul Cotter                                                                                                                                                                                                                                                                                                                                                                                                                                                                                                                                                                                                                                                                                                                                                                                                                                                                                         |
| EPI_ISL_525401, EPI_ISL_1191269, EPI_ISL_1196533, EPI_ISL_1358065, EPI_ISL_1791282, EPI_ISL_2363045, EPI_ISL_2363285, EPI_ISL_2789379, EPI_ISL_3205091, EPI_ISL_3535546, EPI_ISL_3848573, EPI_ISL_3979961, EPI_ISL_4031833, EPI_ISL_4232175, EPI_ISL_4780130, EPI_ISL_4950829, EPI_ISL_5000932, EPI_ISL_5106809, EPI_ISL_5493189, EPI_ISL_5885153, EPI_ISL_6029284, EPI_ISL_6587126, EPI_ISL_6587217, EPI_ISL_7206701, EPI_ISL_7207321, EPI_ISL_775919, EPI_ISL_7776182, EPI_ISL_8783504, EPI_ISL_9243849 | National Virus Reference Laboratory                                                                                             | National Virus Reference Laboratory                                                                                                                                                                                                     | Aditi Chaturvedi; Calum Walsh; Charlene Bennet; Charlene Bennett; Cillian F De Gascun; Fiona Crispie; Gabriel Gonzalez; Jonathan Dean; Matthew McCabe; Michael Carr; Paul Cotter; Suzie Richard; Zoe Yand                                                                                                                                                                                                                                                                                                                                                                                                                                                                                                                                                                                                                                                                                                                                                                                  |
| EPI_ISL_7368966                                                                                                                                                                                                                                                                                                                                                                                                                                                                                           | Nationwide Children's Hospital Clinical Microbiology Lab                                                                        | Nationwide Children's Hospital, Abigail Wexner Research Institute, Institute for Genomic Medicine                                                                                                                                       | Amy Leber; Huanyu Wang; Jocelyn M. Lucyszyn; Richard K. Wilson; Sarah A. Wilson; Sean D. McGrath; Vincent Magnini                                                                                                                                                                                                                                                                                                                                                                                                                                                                                                                                                                                                                                                                                                                                                                                                                                                                          |
| EPI_ISL_491913, EPI_ISL_1624288                                                                                                                                                                                                                                                                                                                                                                                                                                                                           | Naval Infectious Diseases Diagnostic Laboratory                                                                                 | Naval Medical Research Center Biological Defense Research Directorate                                                                                                                                                                   | Adrian Paskey; Andrew Bennett; Bishwo Adhikari; Catherine Arnold; Dessiree Pena-Gomez; Francisco Malgon Bautista; Gregory Rice; Hua Wei Chen; Kimberly Bishop-Lilly; Kyle Long; Lindsay Glang; Logan Voegtly; Mark Simons; Megan Schilling; Regina Cer; Victor Sugiharto                                                                                                                                                                                                                                                                                                                                                                                                                                                                                                                                                                                                                                                                                                                   |
| EPI_ISL_2091006, EPI_ISL_2597941, EPI_ISL_3746039, EPI_ISL_4196776, EPI_ISL_5978472, EPI_ISL_6699574, EPI_ISL_6863047, EPI_ISL_7280810, EPI_ISL_7748073                                                                                                                                                                                                                                                                                                                                                   | Nebraska Public Health Laboratory                                                                                               | NPHL COVID-19 Response Team                                                                                                                                                                                                             | NPHL COVID-19 Response Team                                                                                                                                                                                                                                                                                                                                                                                                                                                                                                                                                                                                                                                                                                                                                                                                                                                                                                                                                                |
| EPI_ISL_8252055                                                                                                                                                                                                                                                                                                                                                                                                                                                                                           | Nemocnice Ceske Budejovice                                                                                                      | Institute of Parasitology, Biology Centre, CAS                                                                                                                                                                                          | Jeffrey Silberman; Martin Kolisko; Monika Wisniewska                                                                                                                                                                                                                                                                                                                                                                                                                                                                                                                                                                                                                                                                                                                                                                                                                                                                                                                                       |
| EPI_ISL_515447, EPI_ISL_1136734, EPI_ISL_1399168, EPI_ISL_4877410, EPI_ISL_4877647, EPI_ISL_5927898                                                                                                                                                                                                                                                                                                                                                                                                       | Nevada State Public Health Laboratory                                                                                           | Nevada State Public Health Laboratory                                                                                                                                                                                                   | Andrew Gorzalski; Chris Laverdure; Cyprian Rossetto; David Jackson; Heather Kerwin; Joel R. Sevinsky; Lynette Gumbleton; Mark Pandori; Natalie Crawford; Paul Hartley; Richard Tillett; Stephanie Van Hooser; Subhash C. Verma; and Mark Pandori                                                                                                                                                                                                                                                                                                                                                                                                                                                                                                                                                                                                                                                                                                                                           |
| EPI_ISL_7732179, EPI_ISL_7732407                                                                                                                                                                                                                                                                                                                                                                                                                                                                          | New Brunswick - Vitalite Health Network                                                                                         | New Brunswick - Vitalite Health Network                                                                                                                                                                                                 | Allain E.; Chacko S.; Crapoulet N.; Desnoyers G.; Garceau R.; Lacroix J.; Lyons P.; Shaw W.                                                                                                                                                                                                                                                                                                                                                                                                                                                                                                                                                                                                                                                                                                                                                                                                                                                                                                |
| EPI_ISL_7716344                                                                                                                                                                                                                                                                                                                                                                                                                                                                                           | New Mexico Department of Health Scientific Laboratory                                                                           | Center for Global Health, University of New Mexico Health Sciences Center                                                                                                                                                               | Anastacia Griego; Darrell Dinwiddie; Daryl Domman; Jesse Young; Joseph Hicks; Kurt Schwalm; Michael Edwards; Twila Kunde; Valerie Morley                                                                                                                                                                                                                                                                                                                                                                                                                                                                                                                                                                                                                                                                                                                                                                                                                                                   |
| EPI_ISL_2652043, EPI_ISL_3819090, EPI_ISL_5393213, EPI_ISL_6308956, EPI_ISL_6469522, EPI_ISL_7739371                                                                                                                                                                                                                                                                                                                                                                                                      | New Mexico Department of Health Scientific Laboratory                                                                           | New Mexico Department of Health Scientific Laboratory                                                                                                                                                                                   | Anastacia Griego-Fisher; D'eldra Malone; Ellie Johnson; Jennifer Benoit; Keila Gutierrez; Linda Salazar; Ratheesh Rajan; T. Mark Willmon                                                                                                                                                                                                                                                                                                                                                                                                                                                                                                                                                                                                                                                                                                                                                                                                                                                   |
| EPI_ISL_872614                                                                                                                                                                                                                                                                                                                                                                                                                                                                                            | Nigeria Centre for Disease Control (NCDC)                                                                                       | African Centre of Excellence for Genomics of Infectious Diseases (ACEGID), Redeemer's University                                                                                                                                        | Oluniyi P.E. et al                                                                                                                                                                                                                                                                                                                                                                                                                                                                                                                                                                                                                                                                                                                                                                                                                                                                                                                                                                         |
| EPI_ISL_8110122                                                                                                                                                                                                                                                                                                                                                                                                                                                                                           | Niigata Prefectural Institute of Public Health and Environmental Sciences                                                       | Niigata Prefectural Institute of Public Health and Environmental Sciences                                                                                                                                                               | Kaori Watanabe; Kentaro Itokawa; Makoto Kuroda; Masanori Hashino; Miyako Kon; Reiko Arai; Rina Tanaka; Takanori Hayashi; Tsutomu Tamura; Tsuyoshi Sekizuka                                                                                                                                                                                                                                                                                                                                                                                                                                                                                                                                                                                                                                                                                                                                                                                                                                 |
| EPI_ISL_2337546                                                                                                                                                                                                                                                                                                                                                                                                                                                                                           | Niigata Prefectural Institute of Public Health and Environmental Sciences                                                       | Pathogen Genomics Center, National Institute of Infectious Diseases                                                                                                                                                                     | Kentaro Itokawa; Makoto Kuroda; Masanori Hashino; Rina Tanaka; Tsuyoshi Sekizuka                                                                                                                                                                                                                                                                                                                                                                                                                                                                                                                                                                                                                                                                                                                                                                                                                                                                                                           |
| EPI_ISL_5640840                                                                                                                                                                                                                                                                                                                                                                                                                                                                                           | NordLab Oulu                                                                                                                    | Expert Microbiology, National Institute for Health and Welfare                                                                                                                                                                          | Carita Savolainen-Kopra; Erika Lindh; Haider al-Hello; Jani Halkilahti; Kirsi Liitsola; Niina Ikonen; Olli Vapalahti; Pekka Ellonen; Phuc Truong; Päivi Laurila; Ravi Kant; Sari Hannula; Soile Blomqvist; Teemu Smura                                                                                                                                                                                                                                                                                                                                                                                                                                                                                                                                                                                                                                                                                                                                                                     |
| EPI_ISL_8712540, EPI_ISL_8888714                                                                                                                                                                                                                                                                                                                                                                                                                                                                          | Nordland Hospital - Bodo, Laboratory Department, Molecular Biology Unit                                                         | Norwegian Institute of Public Health, Department of Virology                                                                                                                                                                            | Atiya R Ali; Debech Nadia; Engebretsen Serina Beate; Garcia Lorente Ignacio; Hilde Elshaug; Hilde Vollan; Jon Bråte; Kamilla Heddeland Instefford; Karoline Bragstad; Kathrine Stene-Johansen; Line Victoria Moen; Marie Paulsen Madsen; Olav Hungnes; Pedersen Benedikte Nevjen; Rasmus Riis Kopperud                                                                                                                                                                                                                                                                                                                                                                                                                                                                                                                                                                                                                                                                                     |
| EPI_ISL_4206189                                                                                                                                                                                                                                                                                                                                                                                                                                                                                           | North Dakota Department of Health, Public Health Laboratory                                                                     | North Dakota Department of Health, Public Health Laboratory                                                                                                                                                                             | Lisa Wingenter                                                                                                                                                                                                                                                                                                                                                                                                                                                                                                                                                                                                                                                                                                                                                                                                                                                                                                                                                                             |
| EPI_ISL_770818                                                                                                                                                                                                                                                                                                                                                                                                                                                                                            | North Memorial                                                                                                                  | Minnesota Department of Health, Public Health Laboratory                                                                                                                                                                                | Alexandra Lorentz; Jacob Garfin; Matt Plumb; and Xiong Wang                                                                                                                                                                                                                                                                                                                                                                                                                                                                                                                                                                                                                                                                                                                                                                                                                                                                                                                                |
| EPI_ISL_524654                                                                                                                                                                                                                                                                                                                                                                                                                                                                                            | North West London Pathology, Imperial College Healthcare NHS Trust                                                              | Wellcome Sanger Institute for the COVID-19 Genomics UK (COG-UK) consortium                                                                                                                                                              | Aileen Rowan; Alison Holmes; Anjna Badhan; Carolina Herrera and Alex Alderton; Cordelia Langford; David K. Jackson; David Muir; Dominic Kwiatkowski; Ewan Harrison; Frankie Bolt; Graham Taylor; Ian Johnston; James Price; John Sillitoe on behalf of the Wellcome Sanger Institute COVID-19 Surveillance Team ( <a href="http://www.sanger.ac.uk/covid-team">http://www.sanger.ac.uk/covid-team</a> ); Ling Li; Paul Randell; Roberto Amato; Sonia Goncalves                                                                                                                                                                                                                                                                                                                                                                                                                                                                                                                             |
| EPI_ISL_5570925                                                                                                                                                                                                                                                                                                                                                                                                                                                                                           | Northern Mindanao TB Regional Center                                                                                            | Philippine Genome Center                                                                                                                                                                                                                | Alethea R. de Guzman; Alyssa Joyce E. Telles; Anna Ong-Lim; Arienne A. Zamora; Benedict A. Maralit; Carlo M. Lapid; Celia Carlos; Cynthia P. Saloma; Devon Ray Pacial; Diomedes A. Carifio; Edsel Maurice Salvana; El King D. Morado; Elcid Aaron R. Pangilinan; Eva Maria Cutiungco-de la Paz; Francis A. Tablizo; Henrietta Marie Rodriguez; Jaime C. Montoya; Jan Michael C. Yap; Jarvin E. Nipales; Jo-Hannah S. Llamas; John Michael Egana; John Q. Wong; Joshua Gregor A. Dizon; Joshua Jose Endozo; Juan Antonio R. Magalang; Karol Sophia Agape R. Padilla; Kris P. Punayan; Kristina Patriz Dela Cruz; Lindsay Clare D.L. Carandang; Ma. Exanil Planting; Marc Edsel C. Ayes; Maria Rosario Singh-Vergeire; Maria Sofia L. Yangzon; Marielle M. Gamboa; Marissa Alejandria; Niña Francesca Bustamante; Razel Nikka M. Hao; Renato Jacinto Q. Mantaring; Rianna Patricia S. Cruz; Shiela Mae M. Araiza; Yvonne Valerie Austria; Zipporah Mariebelle R. Enriquez; Zyrel V. Mollejon |
| EPI_ISL_665875, EPI_ISL_665997, EPI_ISL_921148, EPI_ISL_1051313, EPI_ISL_1103960, EPI_ISL_2434453, EPI_ISL_2723201, EPI_ISL_2723243, EPI_ISL_3001649, EPI_ISL_3001991, EPI_ISL_3002077, EPI_ISL_3421089, EPI_ISL_3570672, EPI_ISL_4115107, EPI_ISL_4306330, EPI_ISL_5466689, EPI_ISL_7283855, EPI_ISL_7283918, EPI_ISL_7562265, EPI_ISL_8706839                                                                                                                                                           | Northumbria University / South Tees Hospitals NHS Foundation Trust / North Cumbria Integrated Care NHS Foundation Trust / North | COVID-19 Genomics UK (COG-UK) Consortium                                                                                                                                                                                                | Andrew Nelson; Brendan Payne; Clive Graham; Darren L Smith; Debra Padgett; Edward Barton; Emma Swindells; Garren Scott; Gary Black; Gary Eltringham; Giles S Holt; Greg R Young; Jane Greenaway; Jennifer Collins; John Allan; Joshua Loh; Lynn Dover; Matthew Bashton; Mohammad A Tariq; Paul Baker; Sarah Essex; Steve Liggett; Wen C Yew; Yusri Taha                                                                                                                                                                                                                                                                                                                                                                                                                                                                                                                                                                                                                                    |



|                                                                                                                                                                                                                                                                                                                                                                                                                                                                                                                                                                                                                                                                                                                                                                                                                                                                                                                                                                                                                                                                                                                                                                                                                                                                                                                                                                                                                                                                                                                                                                                                                                                                                                                                                                                                                                                                                                                                                                                                                                                                                                                                                    |                                                                                                                                |                                                                                                                                                                                              |                                                                                                                                                                                                                                                                                                                                                                                                                                                                                                                                                                                                                                                                                                                                                                                                                                                                                                                                                                                                                                                                                                                                                                                                                                                                                                                                                          |
|----------------------------------------------------------------------------------------------------------------------------------------------------------------------------------------------------------------------------------------------------------------------------------------------------------------------------------------------------------------------------------------------------------------------------------------------------------------------------------------------------------------------------------------------------------------------------------------------------------------------------------------------------------------------------------------------------------------------------------------------------------------------------------------------------------------------------------------------------------------------------------------------------------------------------------------------------------------------------------------------------------------------------------------------------------------------------------------------------------------------------------------------------------------------------------------------------------------------------------------------------------------------------------------------------------------------------------------------------------------------------------------------------------------------------------------------------------------------------------------------------------------------------------------------------------------------------------------------------------------------------------------------------------------------------------------------------------------------------------------------------------------------------------------------------------------------------------------------------------------------------------------------------------------------------------------------------------------------------------------------------------------------------------------------------------------------------------------------------------------------------------------------------|--------------------------------------------------------------------------------------------------------------------------------|----------------------------------------------------------------------------------------------------------------------------------------------------------------------------------------------|----------------------------------------------------------------------------------------------------------------------------------------------------------------------------------------------------------------------------------------------------------------------------------------------------------------------------------------------------------------------------------------------------------------------------------------------------------------------------------------------------------------------------------------------------------------------------------------------------------------------------------------------------------------------------------------------------------------------------------------------------------------------------------------------------------------------------------------------------------------------------------------------------------------------------------------------------------------------------------------------------------------------------------------------------------------------------------------------------------------------------------------------------------------------------------------------------------------------------------------------------------------------------------------------------------------------------------------------------------|
| EPI_ISL_2491584, EPI_ISL_463466, EPI_ISL_4740040, EPI_ISL_5051102                                                                                                                                                                                                                                                                                                                                                                                                                                                                                                                                                                                                                                                                                                                                                                                                                                                                                                                                                                                                                                                                                                                                                                                                                                                                                                                                                                                                                                                                                                                                                                                                                                                                                                                                                                                                                                                                                                                                                                                                                                                                                  | Ostfold Hospital Trust - Kalmes, Centre for Laboratory Medicine, Section for gene technology and infection serology            | Norwegian Institute of Public Health, Department of Virology                                                                                                                                 | Atiya R Ali; Debecb Nadia; Engebretsen Serina Beate; Garcia Llorente Ignacio; Hilde Elshaug; Hilde Vollan; Jon Bråte; Kamilla Heddeland Instefjord; Karoline Bragstad; Kathrine Stene-Johansen; Line Victoria Moen; Marie Paulsen Madsen; Olav Hungnes; Pedersen Benedikte Nevjén; Rasmus Riis Kopperud                                                                                                                                                                                                                                                                                                                                                                                                                                                                                                                                                                                                                                                                                                                                                                                                                                                                                                                                                                                                                                                  |
| EPI_ISL_2293363, EPI_ISL_5409953, EPI_ISL_7195816                                                                                                                                                                                                                                                                                                                                                                                                                                                                                                                                                                                                                                                                                                                                                                                                                                                                                                                                                                                                                                                                                                                                                                                                                                                                                                                                                                                                                                                                                                                                                                                                                                                                                                                                                                                                                                                                                                                                                                                                                                                                                                  | Outre mer<br>Oxford University Clinical Research Unit                                                                          | National Reference Center for Viruses of Respiratory Infections, Institut Pasteur, Paris<br>Oxford University Clinical Research Unit                                                         | Angela Brisebarre; Camille Capel; Christophe Malabat; Corinne Mafraais; Dominique Roussel; Etienne Simon-Lorière; Frédéric Lemoine; Julien Fumej; Laurence Fagour; Louise Lefrançois; Marion Barbet; Maud Vanpeene; Méline Bizard; Pierre Lechat; Slim El-Khari; Sylvie Behillil; Sylvie Van der Werf; Vincent Enouf<br>Dinh Nguyen Huy Man; Guy Thwaites; Lam Anh Nguyet; Le Manh Hung; Le Mau Toan; Nghiem My Ngoc; Nguyen Thanh Dung; Nguyen Thanh Truong; Nguyen Thi Han Ny; Nguyen Thi Thu Hong; Nguyen Tu Anh; Nguyen Van Vinh Chau; Tran Tan Thanh; and Le Van Tan                                                                                                                                                                                                                                                                                                                                                                                                                                                                                                                                                                                                                                                                                                                                                                                |
| EPI_ISL_573182, EPI_ISL_576690, EPI_ISL_595761, EPI_ISL_638977, EPI_ISL_652131, EPI_ISL_652953, EPI_ISL_679834, EPI_ISL_724816, EPI_ISL_819590, EPI_ISL_819779, EPI_ISL_999224, EPI_ISL_1051630, EPI_ISL_1051801, EPI_ISL_1249240, EPI_ISL_1475560, EPI_ISL_1730558, EPI_ISL_1903037, EPI_ISL_3003403, EPI_ISL_3078905, EPI_ISL_3178674, EPI_ISL_3178761, EPI_ISL_3178841                                                                                                                                                                                                                                                                                                                                                                                                                                                                                                                                                                                                                                                                                                                                                                                                                                                                                                                                                                                                                                                                                                                                                                                                                                                                                                                                                                                                                                                                                                                                                                                                                                                                                                                                                                          | see above<br>Oxford Viromics, NDM, University of Oxford; Oxford University Hospitals; Basingstoke and North Hampshire Hospital | COVID-19 Genomics UK (COG-UK) Consortium                                                                                                                                                     | Alex Mobbs; Amy Trebes; Anita Justice; Corinna Moore; Christophe Fraser; David Bonsall; David Buck; Emma Wise; George MacIntyre; Jessica Lynch; John Todd; Mariateresa de Cesare; Matilde Mori; Monique Andersson; Nathan Moore; Nick Cortes; Robert Shaw; Stephen Kidd; Tanya Golubchik; Timothy Peto                                                                                                                                                                                                                                                                                                                                                                                                                                                                                                                                                                                                                                                                                                                                                                                                                                                                                                                                                                                                                                                   |
| EPI_ISL_442755, EPI_ISL_488401, EPI_ISL_488444, EPI_ISL_492383, EPI_ISL_5544130                                                                                                                                                                                                                                                                                                                                                                                                                                                                                                                                                                                                                                                                                                                                                                                                                                                                                                                                                                                                                                                                                                                                                                                                                                                                                                                                                                                                                                                                                                                                                                                                                                                                                                                                                                                                                                                                                                                                                                                                                                                                    | PHE South West Regional Laboratory, National Infection Service<br>PHILIPPINE GENERAL HOSPITAL (PGH)                            | Wellcome Sanger Institute for the COVID-19 Genomics UK (COG-UK) consortium<br>Philippine Genome Center                                                                                       | Alex Alderton; Barry Vipond; Cordelia Langford; David K. Jackson; Dominic Kwiatkowski; Dr Peter Muir; Ewan Harrison; Hannah Pymoth; Ian Johnston; John Sillitoe on behalf of the Wellcome Sanger Institute COVID-19 Surveillance Team (http://www.sanger.ac.uk/covid-team); Rich Hopes; Roberto Amato; Sonia Goncalves; Stephanie Hutchings; and Alex Alderton<br>Alethea R. de Guzman; Anna Ong-Lim; Arienne A. Zamora; Benedict A. Maralit; Carlo M. Lapid; Celia Carlos; Cynthia P. Saloma; Devon Ray Pacial; Diomedes A. Cariño; Edsel Maurice Salvana; El King D. Morado; Elcid Aaron R. Pangilinan; Eva Maria Cutiongco-de la Paz; Francis A. Tablizo; Henrietta Marie Rodriguez; Jaime C. Montoya; Jan Michael C. Yap; Jarvin E. Nipales; Jo-Hannah S. Llamas; John Q. Wong; Joshua Gregor A. Dizon; Juan Antonio R. Magalang; Karol Sophia Agape R. Padilla; Kenneth M. Kim; Kris P. Punayan; Kristina Patriz Dela Cruz; Lindsay Clare D.L. Carandang; Ma. Exanil Plantig; Marc Edsel C. Ayes; Maria Rosario Singh-Vergeire; Maria Sofia L. Yangzon; Marielle M. Gamboa; Marissa Alejandria; Niña Francesca Bustamante; Razel Nikka M. Hao; Renato Jacinto Q. Mantaring; Rianna Patricia S. Cruz; Shiela Mae M. Araiza; Yvonne Valerie Austria; Zipporah Mariebelle R. Enriquez; Zyrel V. Mollejon<br>Chenwei Wang on behalf of Q-PHIRE Genomics |
| EPI_ISL_8437654, EPI_ISL_2617478                                                                                                                                                                                                                                                                                                                                                                                                                                                                                                                                                                                                                                                                                                                                                                                                                                                                                                                                                                                                                                                                                                                                                                                                                                                                                                                                                                                                                                                                                                                                                                                                                                                                                                                                                                                                                                                                                                                                                                                                                                                                                                                   | PHV-FSS<br>PKM SINDANG BARANG BOGOR                                                                                            | PHV-FSS<br>National Institute of Health Research and Development                                                                                                                             | Agustingsih; Ari Ardiansyah Nugraha; Fauzul Muna; Hana Aparsi Pawestri; Hartanti Dian Ikawati; Herna; Holy Arif Wibowo; Irene Lorinda Indarto; Kartika Dewi Puspa; Kindi Adam; Krisna Nur Andriana Pangesti; Natalie Laurencia Kipuw; Nelly Puspandari; Ni Ketut Suslariani; Niki Susanti; Nurika Hariastuti; Reni Herman; Rinir Ramadhany; Subangkit; Tati Febriyanti; Triyani Soekarjo; Ully Alfi Nikmah; Yuli Alfi Nikmah; Yuni Rukminiati                                                                                                                                                                                                                                                                                                                                                                                                                                                                                                                                                                                                                                                                                                                                                                                                                                                                                                            |
| EPI_ISL_2921212, EPI_ISL_6475133, EPI_ISL_7405114, EPI_ISL_7405162, EPI_ISL_2345349                                                                                                                                                                                                                                                                                                                                                                                                                                                                                                                                                                                                                                                                                                                                                                                                                                                                                                                                                                                                                                                                                                                                                                                                                                                                                                                                                                                                                                                                                                                                                                                                                                                                                                                                                                                                                                                                                                                                                                                                                                                                | PO AVEZZANO - U.O.C. Laboratorio Analisi<br>POLICLINICA HORTOLANDIA                                                            | Istituto Zooprofilattico Sperimentale dell'Abruzzo e Molise "G. Caporale"<br>Istituto Butantan / ESALQ-Piracicaba                                                                            | Ancora M; Calistri P; Cammà C; Caporale M; Curini V; Delli Compagni E; Di Domenico M; Di Lollo Valeria; Di Pasquale A; Lorusso A; Mangone I; Marccacci M; Puglia I; Rinaldi A; Savini G; Scialabba S<br>Antonio Jorge Martins; Claudia Renata dos Santos Barros; David Schlesinger; Debora Botequiu Moretti; Dimas Tadeu Covas; Elaine Cristina Marqueze; Elaine Vieira Santos; Evandra Strazza Rodrigues; Heidge Fukumasu; Jayme Augusto de Souza-Neto; José Salvatore Leister Patané; Luiz Alcantara; Luiz Lehmann Coutinho; Maria Carolina Elias; Mauricio Lacerda Nogueira; Rafael dos Santos Bezerra; Raül Machado Neto; Rejane Maria Tommasini Grotto; Ricardo Haddad; Sandra Coccuzzo Sampaio Vessoni; Simone Kashima; Svetoslav Nanev Slavov; Vincent Louis Viala                                                                                                                                                                                                                                                                                                                                                                                                                                                                                                                                                                                |
| EPI_ISL_2695574                                                                                                                                                                                                                                                                                                                                                                                                                                                                                                                                                                                                                                                                                                                                                                                                                                                                                                                                                                                                                                                                                                                                                                                                                                                                                                                                                                                                                                                                                                                                                                                                                                                                                                                                                                                                                                                                                                                                                                                                                                                                                                                                    | POLOKWANE MANKWENG HOSPITAL                                                                                                    | National Institute for Communicable Diseases of the National Health Laboratory Service                                                                                                       | Amoako DG; Bhiman JN; Everatt J; Ismail A; Mahlangu B; Mnguni A; Mohale T; Ntuli N; Scheepers C                                                                                                                                                                                                                                                                                                                                                                                                                                                                                                                                                                                                                                                                                                                                                                                                                                                                                                                                                                                                                                                                                                                                                                                                                                                          |
| EPI_ISL_5694704, EPI_ISL_6566735, EPI_ISL_6865050, EPI_ISL_2493899                                                                                                                                                                                                                                                                                                                                                                                                                                                                                                                                                                                                                                                                                                                                                                                                                                                                                                                                                                                                                                                                                                                                                                                                                                                                                                                                                                                                                                                                                                                                                                                                                                                                                                                                                                                                                                                                                                                                                                                                                                                                                 | PPHC-Purdue Unersity<br>PRONTO ATENDIMENTO DE VARGEM GRANDE PAULISTA                                                           | Animal Disease Diagnostic Laboratory, Purdue University College of Veterinary Medicine<br>Instituto Butantan                                                                                 | Jobin Kattoor; Rebecca P Wilkes<br>Antonio Jorge Martins; Claudia Renata dos Santos Barros; David Schlesinger; Debora Botequiu Moretti; Dimas Tadeu Covas; Elaine Cristina Marqueze; Elaine Vieira Santos; Evandra Strazza Rodrigues; Heidge Fukumasu; Jayme Augusto de Souza-Neto; José Salvatore Leister Patané; Luiz Alcantara; Luiz Lehmann Coutinho; Maria Carolina Elias; Mauricio Lacerda Nogueira; Rafael dos Santos Bezerra; Raül Machado Neto; Rejane Maria Tommasini Grotto; Ricardo Haddad; Sandra Coccuzzo Sampaio Vessoni; Simone Kashima; Svetoslav Nanev Slavov; Vincent Louis Viala                                                                                                                                                                                                                                                                                                                                                                                                                                                                                                                                                                                                                                                                                                                                                     |
| EPI_ISL_8014268                                                                                                                                                                                                                                                                                                                                                                                                                                                                                                                                                                                                                                                                                                                                                                                                                                                                                                                                                                                                                                                                                                                                                                                                                                                                                                                                                                                                                                                                                                                                                                                                                                                                                                                                                                                                                                                                                                                                                                                                                                                                                                                                    | PRONTO ATENDIMENTO UBDS VILA VIRGINIA                                                                                          | Instituto Butantan                                                                                                                                                                           | Antonio Jorge Martins; Claudia Renata dos Santos Barros; David Schlesinger; Debora Botequiu Moretti; Dimas Tadeu Covas; Elaine Cristina Marqueze; Elaine Vieira Santos; Evandra Strazza Rodrigues; Heidge Fukumasu; Jayme Augusto de Souza-Neto; José Salvatore Leister Patané; Luiz Alcantara; Luiz Lehmann Coutinho; Maria Carolina Elias; Mauricio Lacerda Nogueira; Rafael dos Santos Bezerra; Raül Machado Neto; Rejane Maria Tommasini Grotto; Ricardo Haddad; Sandra Coccuzzo Sampaio Vessoni; Simone Kashima; Svetoslav Nanev Slavov; Vincent Louis Viala                                                                                                                                                                                                                                                                                                                                                                                                                                                                                                                                                                                                                                                                                                                                                                                        |
| EPI_ISL_1097819, EPI_ISL_1172413, EPI_ISL_1306764, EPI_ISL_1307628, EPI_ISL_1470919, EPI_ISL_1634170, EPI_ISL_2106584, EPI_ISL_2633013, EPI_ISL_2827223, EPI_ISL_2965249, EPI_ISL_3394587, EPI_ISL_3569282, EPI_ISL_3777720, EPI_ISL_3942840, EPI_ISL_4514380, EPI_ISL_4547228, EPI_ISL_4760869, EPI_ISL_4761147, EPI_ISL_5852259, EPI_ISL_7128724, EPI_ISL_7129116, EPI_ISL_7604791, EPI_ISL_8093654, EPI_ISL_8093826, EPI_ISL_8094147                                                                                                                                                                                                                                                                                                                                                                                                                                                                                                                                                                                                                                                                                                                                                                                                                                                                                                                                                                                                                                                                                                                                                                                                                                                                                                                                                                                                                                                                                                                                                                                                                                                                                                            | see above<br>Pandemic Response Lab - NYC<br>Parkway Medical And Diagnostic Center                                              | Pandemic Response Lab, R&D<br>Philippine Genome Center                                                                                                                                       | Alex Carpio; Cybill del Castillo; Dylan Lang; Haiping Hao; Henry Lee; Isabel Fernandez Escapa; Jon Laurent; Katharine Nelson; Melissa Hopkins; Michael Hammerling; Pradeep Bugga; Shinyung Clair Kang; Sol Rey; William Ward<br>Alethea R. de Guzman; Alyssa Joyce E. Telles; Anna Ong-Lim; Arienne A. Zamora; Benedict A. Maralit; Carlo M. Lapid; Celia Carlos; Cynthia P. Saloma; Devon Ray Pacial; Diomedes A. Cariño; Edsel Maurice Salvana; El King D. Morado; Elcid Aaron R. Pangilinan; Eva Maria Cutiongco-de la Paz; Francis A. Tablizo; Henrietta Marie Rodriguez; Jaime C. Montoya; Jan Michael C. Yap; Jarvin E. Nipales; Jo-Hannah S. Llamas; John Michael Egan; John Q. Wong; Joshua Gregor A. Dizon; Joshua Jose Endozo; Juan Antonio R. Magalang; Karol Sophia Agape R. Padilla; Kris P. Punayan; Kristina Patriz Dela Cruz; Lindsay Clare D.L. Carandang; Ma. Exanil Plantig; Marc Edsel C. Ayes; Maria Rosario Singh-Vergeire; Maria Sofia L. Yangzon; Marielle M. Gamboa; Marissa Alejandria; Niña Francesca Bustamante; Razel Nikka M. Hao; Renato Jacinto Q. Mantaring; Rianna Patricia S. Cruz; Shiela Mae M. Araiza; Yvonne Valerie Austria; Zipporah Mariebelle R. Enriquez; Zyrel V. Mollejon                                                                                                                                  |
| EPI_ISL_4714879, EPI_ISL_4716211                                                                                                                                                                                                                                                                                                                                                                                                                                                                                                                                                                                                                                                                                                                                                                                                                                                                                                                                                                                                                                                                                                                                                                                                                                                                                                                                                                                                                                                                                                                                                                                                                                                                                                                                                                                                                                                                                                                                                                                                                                                                                                                   | Parkway Medical and Diagnostic Center                                                                                          | Philippine Genome Center                                                                                                                                                                     | Alethea R. de Guzman; Anna Ong-Lim; Arienne A. Zamora; Benedict A. Maralit; Carlo M. Lapid; Celia Carlos; Cynthia P. Saloma; Devon Ray Pacial; Diomedes A. Cariño; Edsel Maurice Salvana; El King D. Morado; Elcid Aaron R. Pangilinan; Eva Maria Cutiongco-de la Paz; Francis A. Tablizo; Henrietta Marie Rodriguez; Jaime C. Montoya; Jan Michael C. Yap; Jarvin E. Nipales; Jo-Hannah S. Llamas; John Q. Wong; Joshua Gregor A. Dizon; Juan Antonio R. Magalang; Karol Sophia Agape R. Padilla; Kenneth M. Kim; Kris P. Punayan; Kristina Patriz Dela Cruz; Lindsay Clare D.L. Carandang; Ma. Exanil Plantig; Marc Edsel C. Ayes; Maria Rosario Singh-Vergeire; Maria Sofia L. Yangzon; Marielle M. Gamboa; Marissa Alejandria; Niña Francesca Bustamante; Razel Nikka M. Hao; Renato Jacinto Q. Mantaring; Rianna Patricia S. Cruz; Shiela Mae M. Araiza; Yvonne Valerie Austria; Zipporah Mariebelle R. Enriquez; Zyrel V. Mollejon                                                                                                                                                                                                                                                                                                                                                                                                                 |
| EPI_ISL_4741258, EPI_ISL_5568994                                                                                                                                                                                                                                                                                                                                                                                                                                                                                                                                                                                                                                                                                                                                                                                                                                                                                                                                                                                                                                                                                                                                                                                                                                                                                                                                                                                                                                                                                                                                                                                                                                                                                                                                                                                                                                                                                                                                                                                                                                                                                                                   | Pasig City Children's Hospital - Child's Hope                                                                                  | Philippine Genome Center                                                                                                                                                                     | Alethea R. de Guzman; Alyssa Joyce E. Telles; Anna Ong-Lim; Arienne A. Zamora; Benedict A. Maralit; Carlo M. Lapid; Celia Carlos; Cynthia P. Saloma; Devon Ray Pacial; Diomedes A. Cariño; Edsel Maurice Salvana; El King D. Morado; Elcid Aaron R. Pangilinan; Eva Maria Cutiongco-de la Paz; Francis A. Tablizo; Henrietta Marie Rodriguez; Jaime C. Montoya; Jan Michael C. Yap; Jarvin E. Nipales; Jo-Hannah S. Llamas; John Michael Egan; John Q. Wong; Joshua Gregor A. Dizon; Joshua Jose Endozo; Juan Antonio R. Magalang; Karol Sophia Agape R. Padilla; Kenneth M. Kim; Kris P. Punayan; Kristina Patriz Dela Cruz; Lindsay Clare D.L. Carandang; Ma. Exanil Plantig; Marc Edsel C. Ayes; Maria Rosario Singh-Vergeire; Maria Sofia L. Yangzon; Marielle M. Gamboa; Marissa Alejandria; Niña Francesca Bustamante; Razel Nikka M. Hao; Renato Jacinto Q. Mantaring; Rianna Patricia S. Cruz; Shiela Mae M. Araiza; Yvonne Valerie Austria; Zipporah Mariebelle R. Enriquez; Zyrel V. Mollejon                                                                                                                                                                                                                                                                                                                                                  |
| EPI_ISL_3718044                                                                                                                                                                                                                                                                                                                                                                                                                                                                                                                                                                                                                                                                                                                                                                                                                                                                                                                                                                                                                                                                                                                                                                                                                                                                                                                                                                                                                                                                                                                                                                                                                                                                                                                                                                                                                                                                                                                                                                                                                                                                                                                                    | Pathcare                                                                                                                       | National Institute for Communicable Diseases of the National Health Laboratory Service                                                                                                       | Amoako DG; Bhiman JN; Everatt J; Ismail A; Mahlangu B; Mnguni A; Mohale T; Ntuli N; Scheepers C; Sisonke Team                                                                                                                                                                                                                                                                                                                                                                                                                                                                                                                                                                                                                                                                                                                                                                                                                                                                                                                                                                                                                                                                                                                                                                                                                                            |
| EPI_ISL_684171, EPI_ISL_685158, EPI_ISL_685266, EPI_ISL_685876, EPI_ISL_686156, EPI_ISL_686626, EPI_ISL_687740, EPI_ISL_689967, EPI_ISL_690088, EPI_ISL_690861, EPI_ISL_691346, EPI_ISL_691882, EPI_ISL_692557, EPI_ISL_692688, EPI_ISL_895704, EPI_ISL_895924, EPI_ISL_897287, EPI_ISL_897329, EPI_ISL_898110, EPI_ISL_898349, EPI_ISL_900982, EPI_ISL_901326, EPI_ISL_902215, EPI_ISL_912783, EPI_ISL_1128402, EPI_ISL_1129074, EPI_ISL_1131255, EPI_ISL_1131352, EPI_ISL_1426034, EPI_ISL_1427952, EPI_ISL_1427973, EPI_ISL_1429351, EPI_ISL_1931249, EPI_ISL_1934638, EPI_ISL_2327685, EPI_ISL_2335339, EPI_ISL_2376819, EPI_ISL_2771561, EPI_ISL_2777139, EPI_ISL_3190450, EPI_ISL_3190500, EPI_ISL_3190664, EPI_ISL_3193736, EPI_ISL_3193777, EPI_ISL_3194554, EPI_ISL_3194554, EPI_ISL_3195361, EPI_ISL_3196014, EPI_ISL_3196248, EPI_ISL_3196557, EPI_ISL_3197847, EPI_ISL_3879268, EPI_ISL_3880350, EPI_ISL_3880879, EPI_ISL_3890523, EPI_ISL_38902963, EPI_ISL_3893978, EPI_ISL_3894137, EPI_ISL_3895086, EPI_ISL_4668776, EPI_ISL_4693705, EPI_ISL_4696378, EPI_ISL_4702963, EPI_ISL_4703796, EPI_ISL_4704244, EPI_ISL_4706577, EPI_ISL_4707379, EPI_ISL_4718365, EPI_ISL_4719258, EPI_ISL_4719696, EPI_ISL_4719814, EPI_ISL_4719890, EPI_ISL_4721311, EPI_ISL_4721346, EPI_ISL_4724951, EPI_ISL_4725734, EPI_ISL_4725739, EPI_ISL_4726243, EPI_ISL_4757202, EPI_ISL_4759582, EPI_ISL_5697409, EPI_ISL_5697414, EPI_ISL_5697468, EPI_ISL_5697908, EPI_ISL_5699926, EPI_ISL_5700156, EPI_ISL_5701572, EPI_ISL_5701991, EPI_ISL_5702818, EPI_ISL_5704168, EPI_ISL_5707223, EPI_ISL_5710323, EPI_ISL_5711347, EPI_ISL_5715701, EPI_ISL_5715953, EPI_ISL_5716432, EPI_ISL_5720308, EPI_ISL_5721354, EPI_ISL_5721946, EPI_ISL_5724436, EPI_ISL_5724636, EPI_ISL_5725802, EPI_ISL_5726063, EPI_ISL_5732479, EPI_ISL_5740374, EPI_ISL_5743114, EPI_ISL_5743370, EPI_ISL_5749141, EPI_ISL_5751044, EPI_ISL_7034729, EPI_ISL_7041968, EPI_ISL_7044131, EPI_ISL_7044579, EPI_ISL_7045343, EPI_ISL_7046927, EPI_ISL_7047239, EPI_ISL_7048481, EPI_ISL_7053980, EPI_ISL_7055113, EPI_ISL_7070145, EPI_ISL_7071573, EPI_ISL_7075683, EPI_ISL_7191399 |                                                                                                                                |                                                                                                                                                                                              |                                                                                                                                                                                                                                                                                                                                                                                                                                                                                                                                                                                                                                                                                                                                                                                                                                                                                                                                                                                                                                                                                                                                                                                                                                                                                                                                                          |
| see above                                                                                                                                                                                                                                                                                                                                                                                                                                                                                                                                                                                                                                                                                                                                                                                                                                                                                                                                                                                                                                                                                                                                                                                                                                                                                                                                                                                                                                                                                                                                                                                                                                                                                                                                                                                                                                                                                                                                                                                                                                                                                                                                          | Pathogen Genomics Lab, National Institute of Infectious Diseases                                                               | Pathogen Genomics Center, National Institute of Infectious Diseases                                                                                                                          | Hazuka Y Furihata; Kentaro Itokawa; Makoto Kuroda; Masanori Hashino; Masumichi Saito; Naomi Nojiri; Nozomu Hanaoka; Rina Tanaka; Sana Uchikoba; Tsuguto Fujimoto; Tsuyoshi Sekizuka                                                                                                                                                                                                                                                                                                                                                                                                                                                                                                                                                                                                                                                                                                                                                                                                                                                                                                                                                                                                                                                                                                                                                                      |
| EPI_ISL_512937, EPI_ISL_512949, EPI_ISL_512983, EPI_ISL_513024, EPI_ISL_513038, EPI_ISL_678070                                                                                                                                                                                                                                                                                                                                                                                                                                                                                                                                                                                                                                                                                                                                                                                                                                                                                                                                                                                                                                                                                                                                                                                                                                                                                                                                                                                                                                                                                                                                                                                                                                                                                                                                                                                                                                                                                                                                                                                                                                                     | Pathogen Genomics Lab King Abdullah University of Science and Technology(KAUST)                                                | Pathogen Genomics Lab King Abdullah University of Science and Technology(KAUST)                                                                                                              | Abdulaziz Alahmadi; Afrah Alsomali; Ahmad Bakur Mahmoud; Amanda; Amanda Ooi; Amit Kumar Soudhri; Anwar Hashem; Arnab Pain; Asim Khunger; Fadwa Alofi; Fathia Ben Rached; Jumana Taha; Kahled Alghamdi; Luke; Luke Esau; Muhammad Shuaib; Naif Almontashiri; Nashwa Al-khotani; Olga Dubrovnik; Raeece Naeem; Rahul P Salunke; Raushan Nugmanova; Sara Mfarrej; Sharif Hala                                                                                                                                                                                                                                                                                                                                                                                                                                                                                                                                                                                                                                                                                                                                                                                                                                                                                                                                                                               |
| EPI_ISL_5334384, EPI_ISL_6267903                                                                                                                                                                                                                                                                                                                                                                                                                                                                                                                                                                                                                                                                                                                                                                                                                                                                                                                                                                                                                                                                                                                                                                                                                                                                                                                                                                                                                                                                                                                                                                                                                                                                                                                                                                                                                                                                                                                                                                                                                                                                                                                   | Pathogenic Microorganisms Variability Laboratory<br>Pathology West - NSW Health Pathology                                      | Pathogenic Microorganisms Variability Laboratory<br>NSW Health Pathology - Institute of Clinical Pathology and Medical Research; Westmead Hospital; University of Sydney                     | Alexander Gintsburg; Alexey Shchetinin; Andrey Pochtovy; Daria Kustova; Denis Logunov; Elena Shidlovskaya; Elizaveta Divisenko; Nadezhda Kuznetsova; Vladimir Gushchin<br>Amott A.; Draper J.; Gall M.; Martinez E.; Rockett R.; Sintchenko V.; on behalf of ICPMR                                                                                                                                                                                                                                                                                                                                                                                                                                                                                                                                                                                                                                                                                                                                                                                                                                                                                                                                                                                                                                                                                       |
| EPI_ISL_2603367, EPI_ISL_5440290, EPI_ISL_6036448                                                                                                                                                                                                                                                                                                                                                                                                                                                                                                                                                                                                                                                                                                                                                                                                                                                                                                                                                                                                                                                                                                                                                                                                                                                                                                                                                                                                                                                                                                                                                                                                                                                                                                                                                                                                                                                                                                                                                                                                                                                                                                  | Pathology, University of Alabama at Birmingham<br>Pathology, UAB<br>Pattani Hospital                                           | Pathology, University of Alabama at Birmingham<br>Pathology, UAB<br>Division of Genomic Medicine and Innovation support, Department of Medical Sciences, Ministry of Public Health, Thailand | EJ.; Hendrickson; Leal; Lefkowitz; Moates, D.; R.C.; S.M.<br>EJ.; Hendrickson; Leal; Lefkowitz; Moates, D.; R.C.; S.M.; Van Der Pol; W.J.<br>Archawin Rojanawitwat; Jirapha Pakdee; Natthakul Bunnearng; Nuanjun Wichukhinda; Penpitha Thawong; Pilaluk Akkapaiboon Okada; Puntharika Piboonsiri; Surakameth Mahasirimongkol; Waritta Sawaengdee                                                                                                                                                                                                                                                                                                                                                                                                                                                                                                                                                                                                                                                                                                                                                                                                                                                                                                                                                                                                         |
| EPI_ISL_2189116, EPI_ISL_4741937, EPI_ISL_4742330, EPI_ISL_4742332, EPI_ISL_5540074                                                                                                                                                                                                                                                                                                                                                                                                                                                                                                                                                                                                                                                                                                                                                                                                                                                                                                                                                                                                                                                                                                                                                                                                                                                                                                                                                                                                                                                                                                                                                                                                                                                                                                                                                                                                                                                                                                                                                                                                                                                                | Philippine General Hospital (PGH)                                                                                              | Philippine Genome Center                                                                                                                                                                     | Alethea R. de Guzman; Anna Ong-Lim; Arienne A. Zamora; Asia Louisa U. Chong; Benedict A. Maralit; Candice Francheska B. Tambaoan; Carlo M. Lapid; Celia Carlos; Cynthia P. Saloma; Devon Ray Pacial; Diomedes A. Cariño; Edsel Maurice Salvana; Edsel Maurice Salvaña; El King D. Morado; Elcid Aaron R. Pangilinan; Eva Maria Cutiongco-de la Paz; Francis A. Tablizo; Henrietta Marie Rodriguez; Irish Coleen A. Asin; Jaime C. Montoya; Jan Michael C. Yap; Jarvin E. Nipales; Jo-Hannah S. Llamas; John Q. Wong; Joshua Gregor A. Dizon; Juan Antonio R. Magalang; Karol Sophia Agape R. Padilla; Kenneth M. Kim; Kris P. Punayan; Kristina Patriz Dela Cruz; Lindsay Clare D.L. Carandang; Ma. Exanil Plantig; Marc Edsel C. Ayes; Maria Rosario Singh-Vergeire and Cynthia P. Saloma; Maria Sofia L. Yangzon; Marielle M. Gamboa; Marissa Alejandria; Niña Francesca Bustamante; Razel Nikka M. Hao; Renato Jacinto Q. Mantaring; Rianna Patricia S. Cruz; Shiela Mae M. Araiza; Yvonne Valerie Austria; Zipporah Mariebelle R. Enriquez; Zyrel V. Mollejon                                                                                                                                                                                                                                                                                        |
| EPI_ISL_2189345                                                                                                                                                                                                                                                                                                                                                                                                                                                                                                                                                                                                                                                                                                                                                                                                                                                                                                                                                                                                                                                                                                                                                                                                                                                                                                                                                                                                                                                                                                                                                                                                                                                                                                                                                                                                                                                                                                                                                                                                                                                                                                                                    | Philippine Red Cross - National Blood Center                                                                                   | Philippine Genome Center                                                                                                                                                                     | Alethea R. de Guzman; Anna Ong-Lim; Arienne A. Zamora; Asia Louisa U. Chong; Benedict A. Maralit; Candice Francheska B. Tambaoan; Carlo M. Lapid; Celia Carlos; Devon Ray Pacial; Edsel Maurice Salvaña; El King D. Morado; Elcid Aaron R. Pangilinan; Eva Maria Cutiongco-de la Paz; Francis A. Tablizo; Irish Coleen A. Asin; Jaime C. Montoya; Jan Michael C. Yap; Jo-Hannah S. Llamas; John Q. Wong; Joshua Gregor A. Dizon; Juan Antonio R. Magalang; Karol Sophia Agape R. Padilla; Kenneth M. Kim; Kris P. Punayan; Marc Edsel C. Ayes; Maria Rosario Singh-Vergeire and Cynthia P. Saloma; Maria Sofia L. Yangzon; Marielle M. Gamboa; Marissa Alejandria; Niña Francesca Bustamante; Razel Nikka M. Hao; Renato Jacinto Q. Mantaring; Rianna Patricia S. Cruz; Shiela Mae M. Araiza                                                                                                                                                                                                                                                                                                                                                                                                                                                                                                                                                             |
| EPI_ISL_4712140, EPI_ISL_4712753, EPI_ISL_5554012, EPI_ISL_5557101, EPI_ISL_5561089, EPI_ISL_5566956                                                                                                                                                                                                                                                                                                                                                                                                                                                                                                                                                                                                                                                                                                                                                                                                                                                                                                                                                                                                                                                                                                                                                                                                                                                                                                                                                                                                                                                                                                                                                                                                                                                                                                                                                                                                                                                                                                                                                                                                                                               | Philippine Red Cross - Port Area                                                                                               | Philippine Genome Center                                                                                                                                                                     | Alethea R. de Guzman; Alyssa Joyce E. Telles; Anna Ong-Lim; Arienne A. Zamora; Benedict A. Maralit; Carlo M. Lapid; Celia Carlos; Cynthia P. Saloma; Devon Ray Pacial; Diomedes A. Cariño; Edsel Maurice Salvana; El King D. Morado; Elcid Aaron R. Pangilinan; Eva Maria Cutiongco-de la Paz; Francis A. Tablizo; Henrietta Marie Rodriguez; Jaime C. Montoya; Jan Michael C. Yap; Jarvin E. Nipales; Jo-Hannah S. Llamas; John Michael Egan; John Q. Wong; Joshua Gregor A. Dizon; Joshua Jose Endozo; Juan Antonio R. Magalang; Karol Sophia Agape R. Padilla; Kenneth M. Kim; Kris P. Punayan; Kristina Patriz Dela Cruz; Lindsay Clare D.L. Carandang; Ma. Exanil Plantig; Marc Edsel C. Ayes; Maria Rosario Singh-Vergeire; Maria Sofia L. Yangzon; Marielle M. Gamboa; Marissa Alejandria; Niña Francesca Bustamante; Razel Nikka M. Hao; Renato Jacinto Q. Mantaring; Rianna Patricia S. Cruz; Shiela Mae M. Araiza; Yvonne Valerie Austria; Zipporah Mariebelle R. Enriquez; Zyrel V. Mollejon                                                                                                                                                                                                                                                                                                                                                  |
| EPI_ISL_5540917                                                                                                                                                                                                                                                                                                                                                                                                                                                                                                                                                                                                                                                                                                                                                                                                                                                                                                                                                                                                                                                                                                                                                                                                                                                                                                                                                                                                                                                                                                                                                                                                                                                                                                                                                                                                                                                                                                                                                                                                                                                                                                                                    | Philippine Red Cross - Subic Molecular Laboratory                                                                              | Philippine Genome Center                                                                                                                                                                     | Alethea R. de Guzman; Anna Ong-Lim; Arienne A. Zamora; Benedict A. Maralit; Carlo M. Lapid; Celia Carlos; Cynthia P. Saloma; Devon Ray Pacial; Diomedes A. Cariño; Edsel Maurice Salvana; El King D. Morado; Elcid Aaron R. Pangilinan; Eva Maria Cutiongco-de la                                                                                                                                                                                                                                                                                                                                                                                                                                                                                                                                                                                                                                                                                                                                                                                                                                                                                                                                                                                                                                                                                        |

Paz; Francis A. Tablizo; Henrietta Marie Rodriguez; Jaime C. Montoya; Jan Michael C. Yap; Jyven E. Nipales; Jo-Hannah S. Llamas; John O. Wong; Joshua Gregor A. Dizon; Juan Antonio R. Magalana; Karol Sophia Agape R. Padilla; Kenneth M. Kim; Kris P. Punayan; Kristina Patriz Dela Cruz; Lindsay Clare D.L. Carandang; M.A. Exani Planting; Marc Edsel C. Ayres; Maria Rosario Singh-Vergeira; Maria Sofia L. Yanzon; Marielle M. Gamboa; Marissa Alejandria; Niña Francesca Bustamante; Razel Nikka M. Hso; Renato Jacinto Q. Mantaring; Rianna Patricia S. Cruz; Shiela Mae M. Araiza; Yvonne Valerie Austria; Ziporah Mariebelle R. Enriquez; Zryel V. Mollejon

|                                                                                                                                                                                                                                                                                                                                                                                                                                                                                                                                                                                                                                                                                                                                                                                                                                                                                                                                                                                                                                                                                                                                                                                                                                                                                                                                                                                                                                                                                                                                                                                        |                                                                                                                                                                                                                                                                                                                                                                                                                                                                                                                                                                                                                                                                                                                                                                                         |                                                                                                                                                                                                                                                   |                                                                                                                                                                                                                                                                                                                                                                                                                                                                                                                                                                                                                                                                                                                                                                                                                                                                                                                                                                                                                                                                                                                                                                                                    |
|----------------------------------------------------------------------------------------------------------------------------------------------------------------------------------------------------------------------------------------------------------------------------------------------------------------------------------------------------------------------------------------------------------------------------------------------------------------------------------------------------------------------------------------------------------------------------------------------------------------------------------------------------------------------------------------------------------------------------------------------------------------------------------------------------------------------------------------------------------------------------------------------------------------------------------------------------------------------------------------------------------------------------------------------------------------------------------------------------------------------------------------------------------------------------------------------------------------------------------------------------------------------------------------------------------------------------------------------------------------------------------------------------------------------------------------------------------------------------------------------------------------------------------------------------------------------------------------|-----------------------------------------------------------------------------------------------------------------------------------------------------------------------------------------------------------------------------------------------------------------------------------------------------------------------------------------------------------------------------------------------------------------------------------------------------------------------------------------------------------------------------------------------------------------------------------------------------------------------------------------------------------------------------------------------------------------------------------------------------------------------------------------|---------------------------------------------------------------------------------------------------------------------------------------------------------------------------------------------------------------------------------------------------|----------------------------------------------------------------------------------------------------------------------------------------------------------------------------------------------------------------------------------------------------------------------------------------------------------------------------------------------------------------------------------------------------------------------------------------------------------------------------------------------------------------------------------------------------------------------------------------------------------------------------------------------------------------------------------------------------------------------------------------------------------------------------------------------------------------------------------------------------------------------------------------------------------------------------------------------------------------------------------------------------------------------------------------------------------------------------------------------------------------------------------------------------------------------------------------------------|
| EPI_ISL_8127441,<br>EPI_ISL_8127541                                                                                                                                                                                                                                                                                                                                                                                                                                                                                                                                                                                                                                                                                                                                                                                                                                                                                                                                                                                                                                                                                                                                                                                                                                                                                                                                                                                                                                                                                                                                                    | Plataforma de Vigilancia Molecular (PVM) - FIOCRUZ/BA                                                                                                                                                                                                                                                                                                                                                                                                                                                                                                                                                                                                                                                                                                                                   | Plataforma de Vigilancia Molecular (PVM) - FIOCRUZ/BA                                                                                                                                                                                             | Bruno Bezerril Andrade; Camila I. de Oliveira; Clarissa Araujo Gurgel; Eduardo Oyama; Francys A Rangel; Laila A da Silva; Laise de Moraes; Leonardo Paiva Farias; Marina Cucco; Pedro Silveira; Ricardo Khouri on behalf of the Fiocruz COVID-19 Genomic Surveillance Network.; Tiago Graf                                                                                                                                                                                                                                                                                                                                                                                                                                                                                                                                                                                                                                                                                                                                                                                                                                                                                                         |
| EPI_ISL_1995662,<br>EPI_ISL_6885313                                                                                                                                                                                                                                                                                                                                                                                                                                                                                                                                                                                                                                                                                                                                                                                                                                                                                                                                                                                                                                                                                                                                                                                                                                                                                                                                                                                                                                                                                                                                                    | Plateforme de testing Namuroise                                                                                                                                                                                                                                                                                                                                                                                                                                                                                                                                                                                                                                                                                                                                                         | Plateforme de testing Namuroise                                                                                                                                                                                                                   | Bleret Léonore; Degosserie Jonathan; Demars Aurore; Denis Olivier; Lesly Nyinkeu Kemamen; Maschietto Céline; Mullier François; Nobis Chloé; Nyinkeu Kemamem Lesly; Otto Gaetan                                                                                                                                                                                                                                                                                                                                                                                                                                                                                                                                                                                                                                                                                                                                                                                                                                                                                                                                                                                                                     |
| EPI_ISL_6116188,<br>EPI_ISL_8202728,<br>EPI_ISL_8349281,<br>EPI_ISL_8465722                                                                                                                                                                                                                                                                                                                                                                                                                                                                                                                                                                                                                                                                                                                                                                                                                                                                                                                                                                                                                                                                                                                                                                                                                                                                                                                                                                                                                                                                                                            | Platform BIS UZA/UAantwerpen                                                                                                                                                                                                                                                                                                                                                                                                                                                                                                                                                                                                                                                                                                                                                            | Labo Klinische Biologie, UZA                                                                                                                                                                                                                      | Basil Britto Xavier; Christine Lammens; Herman Goossens; Ines Verbesselt; Jasmine Coppens; Kathleen Holemans; Marie Le Mercier; Veerle Matheusssen                                                                                                                                                                                                                                                                                                                                                                                                                                                                                                                                                                                                                                                                                                                                                                                                                                                                                                                                                                                                                                                 |
| EPI_ISL_2488760                                                                                                                                                                                                                                                                                                                                                                                                                                                                                                                                                                                                                                                                                                                                                                                                                                                                                                                                                                                                                                                                                                                                                                                                                                                                                                                                                                                                                                                                                                                                                                        | Policlinico Universitario Campus Bio-Medico, Rome, Italy                                                                                                                                                                                                                                                                                                                                                                                                                                                                                                                                                                                                                                                                                                                                | Policlinico Universitario Campus Bio-Medico, Rome, Italy                                                                                                                                                                                          | Elisabetta Riva; Francesca Antonelli; Lucia de Florio; Maria Francesconi; Marta Fogolari; Marta Giovanetti; Massimo Ciccozzi; Roberta Veralli; Silvia Angeletti                                                                                                                                                                                                                                                                                                                                                                                                                                                                                                                                                                                                                                                                                                                                                                                                                                                                                                                                                                                                                                    |
| EPI_ISL_6841784<br>EPI_ISL_2759468                                                                                                                                                                                                                                                                                                                                                                                                                                                                                                                                                                                                                                                                                                                                                                                                                                                                                                                                                                                                                                                                                                                                                                                                                                                                                                                                                                                                                                                                                                                                                     | Polyanalytic SA<br>Population Medicine and Diagnostic Sciences, Cornell University                                                                                                                                                                                                                                                                                                                                                                                                                                                                                                                                                                                                                                                                                                      | Genesupport<br>Population Medicine and Diagnostic Sciences, Cornell University                                                                                                                                                                    | Geraldine Jost; Katia Jaton; Nadia Liassine; Tanguy ARAUD<br>Anderson; B.D.; Caserta; Cronk; D.G.; Diel; L.C.; Laverack, M.; Mitchell; P.K.; Plocharczyk, E.; R.R.; Venugopalan, R.                                                                                                                                                                                                                                                                                                                                                                                                                                                                                                                                                                                                                                                                                                                                                                                                                                                                                                                                                                                                                |
| EPI_ISL_4052671<br>EPI_ISL_9100744<br>EPI_ISL_3804049<br>EPI_ISL_1008712,<br>EPI_ISL_8038533<br>EPI_ISL_2802864<br>EPI_ISL_5801266                                                                                                                                                                                                                                                                                                                                                                                                                                                                                                                                                                                                                                                                                                                                                                                                                                                                                                                                                                                                                                                                                                                                                                                                                                                                                                                                                                                                                                                     | Precision Genomics<br>Premier Laboratory Servc<br>Presidio Ospedaliero "Madonna delle Grazie" di Matera<br>Presidio di Brindisi Di Summa - Perrino<br>Primary Health Care Prijedor<br>Pronto Socorro Municipal De Severinia                                                                                                                                                                                                                                                                                                                                                                                                                                                                                                                                                             | MUSC Molecular Pathology Laboratory<br>BioInfoExperts<br>ASM - P.O. Madonna delle Grazie - Matera<br>Istituto Zooprofilattico Sperimentale della Puglia e della Basilicata<br>Public Health Institute of Republic of Srpska<br>Instituto Butantan | Ana Olivo; Ana Vallari; Barbara Harris; Dariusz Pytel; Frederick S. Nolte; Gavin Cloherty; Jaclyn Dunne; Jeremy Stuart; Jim Madory; Julie W. Hirschhorn; Kristen Maurer; Mary Rodgers; Scott Curry; Todd Meyer; W. Bailey Glen Jr<br>Cheryl Metzler; David Nolan; Rebecca Rose; Susanna Lamers; Valerie Murray<br>Massimo Dell'Edera<br>Barbieri G.; Bianco A.; Capozzi L.; Chironna M.; Del Sambro L.; Giannico A.; Loconsole D.; Parisi A.; Quarato C.; Ridolfi D.; Sallustio A.; Santoro A.; Simone D.<br>Branka Culibrk; Dijana Vukajlovic; Milica Celic; Pava Dimitrijevic; Stanka Tomic; Tatjana Markovic; Zeljka Sumic<br>Antonio Jorge Martins; Claudia Renata dos Santos Barros; David Schlesinger; Debora Botequiu Moretti; Dimas Tadeu Covas; Elaine Cristina Marquize; Elaine Vieira Santos; Evandra Strazza Rodrigues; Heidge Fukumasu; Jayme Augusto de Souza-Neto; José Salvatore Leister Patané; Luiz Alcantara; Luiz Lehmann Coutinho; Maria Carolina Elias; Maurício Lacerda Nogueira; Rafael dos Santos Bezerra; Raul Machado Neto; Rejane Maria Tommasini Grotto; Ricardo Haddad; Sandra Coccuzzo Sampaio Vessoni; Simone Kashima; Svetoslav Nanev Slavov; Vincent Louis Viala |
| EPI_ISL_8751811<br>EPI_ISL_5800204                                                                                                                                                                                                                                                                                                                                                                                                                                                                                                                                                                                                                                                                                                                                                                                                                                                                                                                                                                                                                                                                                                                                                                                                                                                                                                                                                                                                                                                                                                                                                     | Providence Santa Rosa Memorial Hospital Lab<br>Psf Maria Jose Salto De Pirapora                                                                                                                                                                                                                                                                                                                                                                                                                                                                                                                                                                                                                                                                                                         | Sonoma County Public Health Laboratory<br>Instituto Butantan                                                                                                                                                                                      | Carlos Gonzalez; Iryna Goraichuk; Lisa Critchett; Rachel Rees<br>Antonio Jorge Martins; Claudia Renata dos Santos Barros; David Schlesinger; Debora Botequiu Moretti; Dimas Tadeu Covas; Elaine Cristina Marquize; Elaine Vieira Santos; Evandra Strazza Rodrigues; Heidge Fukumasu; Jayme Augusto de Souza-Neto; José Salvatore Leister Patané; Luiz Alcantara; Luiz Lehmann Coutinho; Maria Carolina Elias; Maurício Lacerda Nogueira; Rafael dos Santos Bezerra; Raul Machado Neto; Rejane Maria Tommasini Grotto; Ricardo Haddad; Sandra Coccuzzo Sampaio Vessoni; Simone Kashima; Svetoslav Nanev Slavov; Vincent Louis Viala                                                                                                                                                                                                                                                                                                                                                                                                                                                                                                                                                                 |
| EPI_ISL_6132868,<br>EPI_ISL_7211938<br>EPI_ISL_1520271, EPI_ISL_2448764, EPI_ISL_2688106, EPI_ISL_4172149, EPI_ISL_5611594,<br>see above                                                                                                                                                                                                                                                                                                                                                                                                                                                                                                                                                                                                                                                                                                                                                                                                                                                                                                                                                                                                                                                                                                                                                                                                                                                                                                                                                                                                                                               | Public Health Authority of the Slovak Republic<br>Public Health Authority of the Slovak Republic                                                                                                                                                                                                                                                                                                                                                                                                                                                                                                                                                                                                                                                                                        | Biomedical Centre Martin, Jessenius Faculty of Medicine in Martin, Comenius University<br>Laboratory of Genomics and Bioinformatics, Comenius University Science Park                                                                             | Dusan Loderer; Ivana Kasubova; Katarina Janikova; Maria Skerenova; Marian Grendar<br>Anna Gičová; Diana Růšňáková; Jakub Styk; Jaroslav Budiš; Miroslav Böhmer; Tatiana Sediáčková; Tomáš Szemes                                                                                                                                                                                                                                                                                                                                                                                                                                                                                                                                                                                                                                                                                                                                                                                                                                                                                                                                                                                                   |
| EPI_ISL_2687721,<br>EPI_ISL_4057477,<br>EPI_ISL_5433814,<br>EPI_ISL_7507102<br>EPI_ISL_613516                                                                                                                                                                                                                                                                                                                                                                                                                                                                                                                                                                                                                                                                                                                                                                                                                                                                                                                                                                                                                                                                                                                                                                                                                                                                                                                                                                                                                                                                                          | Public Health Authority of the Slovak Republic<br>Public Health Laboratory - Infectious Disease Lab, Minnesota Department of Health Infectious Disease Laboratory Submission Group                                                                                                                                                                                                                                                                                                                                                                                                                                                                                                                                                                                                      | Public Health Authority of the Slovak Republic<br>Minnesota Department of Health, Public Health Laboratory                                                                                                                                        | Anna Gičová; Barbora Kotvasová; Dusan Loderer; Elena Tichá; Ivana Kasubova; Katarina Janikova; Lucia Ševčíková; Marian Grendar; Miroslav Böhmer; Pavol Mišenko; Terézia Vrabťová; Tomáš Szemes<br>Garfin, J.; Lorentz, A.; Plumb, M.; Wang, X.                                                                                                                                                                                                                                                                                                                                                                                                                                                                                                                                                                                                                                                                                                                                                                                                                                                                                                                                                     |
| EPI_ISL_2698247,<br>EPI_ISL_2699101,<br>EPI_ISL_6607248,<br>EPI_ISL_7959575,<br>EPI_ISL_7959601,<br>EPI_ISL_7960033                                                                                                                                                                                                                                                                                                                                                                                                                                                                                                                                                                                                                                                                                                                                                                                                                                                                                                                                                                                                                                                                                                                                                                                                                                                                                                                                                                                                                                                                    | Public Health Laboratory, Minnesota Department of Health                                                                                                                                                                                                                                                                                                                                                                                                                                                                                                                                                                                                                                                                                                                                | University of Minnesota Genomics Center                                                                                                                                                                                                           | Corbin Dirxx; Daryl M. Gohl; Jaquelyn Kuriger-Laber; John Garbe; and Sean Wang                                                                                                                                                                                                                                                                                                                                                                                                                                                                                                                                                                                                                                                                                                                                                                                                                                                                                                                                                                                                                                                                                                                     |
| EPI_ISL_8117243,<br>EPI_ISL_8117367,<br>EPI_ISL_8117799,<br>EPI_ISL_8323661,<br>EPI_ISL_8324386,<br>EPI_ISL_8577810                                                                                                                                                                                                                                                                                                                                                                                                                                                                                                                                                                                                                                                                                                                                                                                                                                                                                                                                                                                                                                                                                                                                                                                                                                                                                                                                                                                                                                                                    | Public Health Ontario Laboratory                                                                                                                                                                                                                                                                                                                                                                                                                                                                                                                                                                                                                                                                                                                                                        | Public Health Ontario Laboratory                                                                                                                                                                                                                  | Aimin Li; Alireza Eshaghi; Andre Villegas; Ashleigh Sullivan; Christine Frantz; Dean Maxwell; Esha Joshi; Jared Simpson; Jennifer L Guthrie; Jonathan B Gubbay; Karthikeyan Sivaraman; Lawrence Heisler; Matthew Watson; Michael CY Li; Michael Laszloffy; Nahuel Fittipaldi; Philip Banh; Richard de Borja; Samir N Patel; Sandeep Nagra; Sandra Zittermann; Sarah Teatero; Vanessa G Allen; Yao Chen; Yogi Sundaravadanam                                                                                                                                                                                                                                                                                                                                                                                                                                                                                                                                                                                                                                                                                                                                                                        |
| EPI_ISL_2351175                                                                                                                                                                                                                                                                                                                                                                                                                                                                                                                                                                                                                                                                                                                                                                                                                                                                                                                                                                                                                                                                                                                                                                                                                                                                                                                                                                                                                                                                                                                                                                        | Public Health Service Center 1 Saphan Mon                                                                                                                                                                                                                                                                                                                                                                                                                                                                                                                                                                                                                                                                                                                                               | Division of Genomic Medicine and Innovation support, Department of Medical Sciences, Ministry of Public Health, Thailand                                                                                                                          | Archawin Rojanawiwat; Jirapha Pakdee; Natthakul Buneang; Nuanjun Wichukchinda; Penpitcha Thawong; Pilaiui Akkapaiboon Okada; Puntharika Piboonsiri; Surakameth Mahasirimongkol; Waritta Sawaengdee                                                                                                                                                                                                                                                                                                                                                                                                                                                                                                                                                                                                                                                                                                                                                                                                                                                                                                                                                                                                 |
| EPI_ISL_2426881,<br>EPI_ISL_2688302,<br>EPI_ISL_5095359,<br>EPI_ISL_5095374<br>EPI_ISL_2615847                                                                                                                                                                                                                                                                                                                                                                                                                                                                                                                                                                                                                                                                                                                                                                                                                                                                                                                                                                                                                                                                                                                                                                                                                                                                                                                                                                                                                                                                                         | Puerto Rico Department of Health<br>QLabs                                                                                                                                                                                                                                                                                                                                                                                                                                                                                                                                                                                                                                                                                                                                               | Centers for Disease Control and Prevention, Dengue Branch<br>WVU and Marshall University Combined Genomics Core Facilities                                                                                                                        | Betzabel Flores; Gabriela Paz-Bailey; Gilberto A. Santiago; Glenda Gonzalez; Jorge L. Munoz-Jordan; Keyla Charriez<br>James Denvir; Peter Perrotta; Peter Stoilov; Ryan Percifield; Wesley Kimble                                                                                                                                                                                                                                                                                                                                                                                                                                                                                                                                                                                                                                                                                                                                                                                                                                                                                                                                                                                                  |
| EPI_ISL_573099, EPI_ISL_596095, EPI_ISL_664931, EPI_ISL_921863, EPI_ISL_1386382, EPI_ISL_2519956, EPI_ISL_2520186, EPI_ISL_2706920, EPI_ISL_2706990, EPI_ISL_2902842, EPI_ISL_3177653, EPI_ISL_3178294, EPI_ISL_3571515, EPI_ISL_3572291, EPI_ISL_3773239, EPI_ISL_3773330, EPI_ISL_4116796, EPI_ISL_4307679, EPI_ISL_5468912, EPI_ISL_5471963, EPI_ISL_5472446, EPI_ISL_5473247,<br>see above                                                                                                                                                                                                                                                                                                                                                                                                                                                                                                                                                                                                                                                                                                                                                                                                                                                                                                                                                                                                                                                                                                                                                                                         | Quadram Institute Bioscience                                                                                                                                                                                                                                                                                                                                                                                                                                                                                                                                                                                                                                                                                                                                                            | COVID-19 Genomics UK (COG-UK) Consortium                                                                                                                                                                                                          | Alexander J Trotter; Alison E. Mather; Alp Aydin; Ana P. Tedim; Anastasia Kolyva; Andrew Bell; Andrew J. Page; Christopher Jeanes; Claire Stuart; Dave J. Baker; Ebenezer Foster-Nyarko; Gemma L. Kay; John Wain; Justin O'Grady; Justin O'Grady; Leonardo de Oliveira Martins; Lewis G. Spurgin; Lindsay Coupland; Lizzie Meadows; Luke Bedford; Maria Diaz; Mark Webber; Martin Lott; Michaela Matthews; Muhammed Yasir; Nabil-Fareed Alikhan; Ngozi Elumogo; Nicholas M. Thomson; Rachael Stanley; Rachel Gilroy; Reenesh Prakash; Rose K Davidson; Samir Deudering; Samuel Bloofield; Sophie J. Proselke; Steven Rudder; Thanh Le-Viet                                                                                                                                                                                                                                                                                                                                                                                                                                                                                                                                                         |
| EPI_ISL_7166598,<br>EPI_ISL_8177742,<br>EPI_ISL_9132066                                                                                                                                                                                                                                                                                                                                                                                                                                                                                                                                                                                                                                                                                                                                                                                                                                                                                                                                                                                                                                                                                                                                                                                                                                                                                                                                                                                                                                                                                                                                | Quadrant Laboratories, LLC                                                                                                                                                                                                                                                                                                                                                                                                                                                                                                                                                                                                                                                                                                                                                              | SUNY Upstate Medical University                                                                                                                                                                                                                   | Brian Pavlovitz; Frank Middleton                                                                                                                                                                                                                                                                                                                                                                                                                                                                                                                                                                                                                                                                                                                                                                                                                                                                                                                                                                                                                                                                                                                                                                   |
| EPI_ISL_595241                                                                                                                                                                                                                                                                                                                                                                                                                                                                                                                                                                                                                                                                                                                                                                                                                                                                                                                                                                                                                                                                                                                                                                                                                                                                                                                                                                                                                                                                                                                                                                         | Queens Medical Centre, Clinical Microbiology Department / DeepSeq Nottingham                                                                                                                                                                                                                                                                                                                                                                                                                                                                                                                                                                                                                                                                                                            | COVID-19 Genomics UK (COG-UK) Consortium                                                                                                                                                                                                          | Christopher Moore; Fei Sang; Gemma Clark; Hannah Howson-Wells; Johnny Debebe; Jonathan Ball; Joseph Chappell; Manjinder Khakh; Matthew Carlisle; Matthew Loose; Michelle M Lister; Nadine Holmes; Patrick McClure; Theocharis Tsolemidis; Vicki M Fleming; Victoria Wright; Wendy Smith                                                                                                                                                                                                                                                                                                                                                                                                                                                                                                                                                                                                                                                                                                                                                                                                                                                                                                            |
| EPI_ISL_1300529,<br>EPI_ISL_2283764<br>EPI_ISL_7737758                                                                                                                                                                                                                                                                                                                                                                                                                                                                                                                                                                                                                                                                                                                                                                                                                                                                                                                                                                                                                                                                                                                                                                                                                                                                                                                                                                                                                                                                                                                                 | Queensland Health Forensic and Scientific Services<br>Queensland Medical Laboratories                                                                                                                                                                                                                                                                                                                                                                                                                                                                                                                                                                                                                                                                                                   | Queensland Health Forensic and Scientific Services<br>Microbiological Diagnostic Unit - Public Health Laboratory (MDU-PHL)                                                                                                                        | Son Nguyen<br>Horan, K.; N.L.; Palou, T.; Seemann, T.; Sherry; Susapu, M.                                                                                                                                                                                                                                                                                                                                                                                                                                                                                                                                                                                                                                                                                                                                                                                                                                                                                                                                                                                                                                                                                                                          |
| EPI_ISL_1424538,<br>EPI_ISL_1424545                                                                                                                                                                                                                                                                                                                                                                                                                                                                                                                                                                                                                                                                                                                                                                                                                                                                                                                                                                                                                                                                                                                                                                                                                                                                                                                                                                                                                                                                                                                                                    | Queensland Medical Laboratories                                                                                                                                                                                                                                                                                                                                                                                                                                                                                                                                                                                                                                                                                                                                                         | Victorian Infectious Diseases Reference Laboratory (VIDRL) and the Melbourne Diagnostic Unit Public Health Laboratory (MDU-PHL)                                                                                                                   | N.L.; Palou, T.; Seemann, T.; Sherry; Vaccher, S.                                                                                                                                                                                                                                                                                                                                                                                                                                                                                                                                                                                                                                                                                                                                                                                                                                                                                                                                                                                                                                                                                                                                                  |
| EPI_ISL_3254239<br>EPI_ISL_571198,<br>EPI_ISL_571553,<br>EPI_ISL_877059                                                                                                                                                                                                                                                                                                                                                                                                                                                                                                                                                                                                                                                                                                                                                                                                                                                                                                                                                                                                                                                                                                                                                                                                                                                                                                                                                                                                                                                                                                                | Quest Diagnostics<br>Quest Diagnostics                                                                                                                                                                                                                                                                                                                                                                                                                                                                                                                                                                                                                                                                                                                                                  | New York City Public Health Laboratory<br>Quest Diagnostics                                                                                                                                                                                       | Jade Wang; et al.<br>Anderson, B.; Bernstein, D.F.; Gerasimova, A.; Grover, D.; Hua, M.; I.A.; K.E.; Kagan, L.E.; Lacbawan, F.; Liu Y.; Livingston; Owen, R.; Perez, A.; R.M.; Rosenthal, S.H.; Shalhout; Shlyakhter; Tanpaiboon, P.                                                                                                                                                                                                                                                                                                                                                                                                                                                                                                                                                                                                                                                                                                                                                                                                                                                                                                                                                               |
| EPI_ISL_1220666, EPI_ISL_1253388, EPI_ISL_1267382, EPI_ISL_1314933, EPI_ISL_1479703, EPI_ISL_1480808, EPI_ISL_1551705, EPI_ISL_1559462, EPI_ISL_1648717, EPI_ISL_1668680, EPI_ISL_1669082, EPI_ISL_1669197, EPI_ISL_1691545, EPI_ISL_1798127, EPI_ISL_1818193, EPI_ISL_1924746, EPI_ISL_1989706, EPI_ISL_2047011, EPI_ISL_2133804, EPI_ISL_2268451, EPI_ISL_2268559, EPI_ISL_2269130, EPI_ISL_2367986, EPI_ISL_2369247, EPI_ISL_2439517, EPI_ISL_2439534, EPI_ISL_2439951, EPI_ISL_2451308, EPI_ISL_2451411, EPI_ISL_2870795, EPI_ISL_2874094, EPI_ISL_2876115, EPI_ISL_2930031, EPI_ISL_3114226, EPI_ISL_3114396, EPI_ISL_3114813, EPI_ISL_3212847, EPI_ISL_3213011, EPI_ISL_3213813, EPI_ISL_3330755, EPI_ISL_3331040, EPI_ISL_3331147, EPI_ISL_3331209, EPI_ISL_3396129, EPI_ISL_3740291, EPI_ISL_4020262, EPI_ISL_4028497, EPI_ISL_4187042, EPI_ISL_4188163, EPI_ISL_4247838, EPI_ISL_4248522, EPI_ISL_4249370, EPI_ISL_4249579, EPI_ISL_4249625, EPI_ISL_4367658, EPI_ISL_4369977, EPI_ISL_4371419, EPI_ISL_4371912, EPI_ISL_4373753, EPI_ISL_4458684, EPI_ISL_4462962, EPI_ISL_5068584, EPI_ISL_5081732, EPI_ISL_5093741, EPI_ISL_5099956, EPI_ISL_5320618, EPI_ISL_5387771, EPI_ISL_5388400, EPI_ISL_5418946, EPI_ISL_5928618, EPI_ISL_5961680, EPI_ISL_6001924, EPI_ISL_6066475, EPI_ISL_602686, EPI_ISL_602991, EPI_ISL_6414849, EPI_ISL_7235409, EPI_ISL_7235983, EPI_ISL_7236254, EPI_ISL_7236329, EPI_ISL_7236858, EPI_ISL_7451625, EPI_ISL_7706074, EPI_ISL_7706754, EPI_ISL_7936296, EPI_ISL_7936730, EPI_ISL_7947487, EPI_ISL_8029695, EPI_ISL_8407034, EPI_ISL_8430875 | Centers for Disease Control and Prevention Division of Viral Diseases, Pathogen Discovery<br>A. Gerasimova; A. Perez; Adrian Paskey; B. Anderson; Ben L. Rambo-Martin; Benjamin Rambo-Martin; Christopher Gulvick; Clinton Paden; Clinton R. Paden; Dakota Howard; Darlene Wagner; Dhvani Batra; Duncan MacCannell; Erisa Sula; F. Lacbawan; I. A. Shlyakhter; I. Shlyakhter; Jason Caravas; K. Livingston; K.E. Livingston; Kara Moser; Kristine Lacey; L. Bernstein; L.E. Bernstein; M. Hua; Matthew Scherer; P. Tanpaiboon; Peter Cook; Peter W. Cook; R. Kagan; R. M. Kagan; R. Owen; R. Rolando; R. V. Rolando; S. H. Rosenthal; S. Rosenthal; Sammons; Scott; Scott Sammons; Shatavia Morrison; Suxiang Tong; Tymeckia Kendall; Victoria Caban Figueroa; Y. Liu; Yvette Unoarumhi |                                                                                                                                                                                                                                                   |                                                                                                                                                                                                                                                                                                                                                                                                                                                                                                                                                                                                                                                                                                                                                                                                                                                                                                                                                                                                                                                                                                                                                                                                    |
| EPI_ISL_1086883, EPI_ISL_1087087, EPI_ISL_1114547, EPI_ISL_1139284, EPI_ISL_1139607, EPI_ISL_1139725, EPI_ISL_1159440, EPI_ISL_1159461                                                                                                                                                                                                                                                                                                                                                                                                                                                                                                                                                                                                                                                                                                                                                                                                                                                                                                                                                                                                                                                                                                                                                                                                                                                                                                                                                                                                                                                 | Quest Diagnostics Incorporated                                                                                                                                                                                                                                                                                                                                                                                                                                                                                                                                                                                                                                                                                                                                                          | Centers for Disease Control and Prevention Division of Viral Diseases, Pathogen Discovery                                                                                                                                                         | A. Gerasimova; A. Perez; Adrian Paskey; B. Anderson; Ben L. Rambo-Martin; Benjamin Rambo-Martin; Christopher Gulvick; Clinton Paden; Clinton R. Paden; Dakota Howard; Darlene Wagner; Dhvani Batra; Duncan MacCannell; Erisa Sula; F. Lacbawan; I. A. Shlyakhter; I. Shlyakhter; Jason Caravas; K. Livingston; K.E. Livingston; Kara Moser; Kristine Lacey; L. Bernstein; L.E. Bernstein; M. Hua; Matthew Scherer; P. Tanpaiboon; Peter Cook; Peter W. Cook; R. Kagan; R. M. Kagan; R. Owen; R. Rolando; R. V. Rolando; S. H. Rosenthal; S. Rosenthal; Sammons; Scott; Scott Sammons; Shatavia Morrison; Suxiang Tong; Tymeckia Kendall; Victoria Caban Figueroa; Y. Liu; Yvette Unoarumhi                                                                                                                                                                                                                                                                                                                                                                                                                                                                                                         |

|                                                                                                                                                                                                                                                                                                                                                                                                                                                                                                                                                                                                                                                     |                                                                                                                    |                                                                                                                             |                                                                                                                                                                                                                                                                                                                                                                                                                                                                                                                                                                                                                                                                                                                                                                                                                                                                                                                                                                                            |
|-----------------------------------------------------------------------------------------------------------------------------------------------------------------------------------------------------------------------------------------------------------------------------------------------------------------------------------------------------------------------------------------------------------------------------------------------------------------------------------------------------------------------------------------------------------------------------------------------------------------------------------------------------|--------------------------------------------------------------------------------------------------------------------|-----------------------------------------------------------------------------------------------------------------------------|--------------------------------------------------------------------------------------------------------------------------------------------------------------------------------------------------------------------------------------------------------------------------------------------------------------------------------------------------------------------------------------------------------------------------------------------------------------------------------------------------------------------------------------------------------------------------------------------------------------------------------------------------------------------------------------------------------------------------------------------------------------------------------------------------------------------------------------------------------------------------------------------------------------------------------------------------------------------------------------------|
| see above                                                                                                                                                                                                                                                                                                                                                                                                                                                                                                                                                                                                                                           | Quest Diagnostics Incorporated                                                                                     | Respiratory Viruses Branch, Division of Viral Diseases, Centers for Disease Control and Prevention                          | A. Gerasimova; A. Perez; B. Anderson; Ben L. Rambo-Martin; Clinton R. Paden; Dakota Howard; Dhvani Batra; Duncan MacCannell; F. Lacbawan; I. A. Shlyakhter; K.E. Livingston; L.E. Bernstein; M. Hua; P. Tanpaiboon; Peter W. Cook; R. M. Kagan; R. Owen; R. V. Rolando; S. H. Rosenthal; Suxiang Tong; Y. Liu                                                                                                                                                                                                                                                                                                                                                                                                                                                                                                                                                                                                                                                                              |
| EPI_ISL_4805128                                                                                                                                                                                                                                                                                                                                                                                                                                                                                                                                                                                                                                     | REUNILAB                                                                                                           | CNR Virus des Infections Respiratoires - France SUD                                                                         | Antonin Bal; Bruno Lina; Gregory Destras; Gwendolynne Burfin; Hadrien Regue; Laurence Josset; Martine Valette; Quentin Semanas                                                                                                                                                                                                                                                                                                                                                                                                                                                                                                                                                                                                                                                                                                                                                                                                                                                             |
| EPI_ISL_1629308, EPI_ISL_3153837, EPI_ISL_3153996, EPI_ISL_3154338, EPI_ISL_9372402, EPI_ISL_9372745, EPI_ISL_9374008                                                                                                                                                                                                                                                                                                                                                                                                                                                                                                                               | REUNILAB                                                                                                           | UMR PIMIT                                                                                                                   | Dr Camille Lebarbenchon; Dr David A Wilkinson; Dr Jonathan Turpin; Dr Patrick Mavingui; Magali Turpin; Marie-Alice Simbi                                                                                                                                                                                                                                                                                                                                                                                                                                                                                                                                                                                                                                                                                                                                                                                                                                                                   |
| see above                                                                                                                                                                                                                                                                                                                                                                                                                                                                                                                                                                                                                                           | RI State Health Laboratories                                                                                       | Centers for Disease Control and Prevention Division of Viral Diseases, Pathogen Discovery                                   | Alex Burgin; Alison Laufer Halpin; Ben L. Rambo-Martin; Ben Rambo-Martin; Clinton Paden; Clinton R. Paden; Dakota Howard; Darlene Wagner; Dave Wentworth; Dhvani Batra; Jasmine Padilla; Joseph Madden; Justin Lee; Katie Dillon; Krista Queen; Kristen Knipe; Kristine Lacey; Mark Burroughs; Matthew Schmerer; Meghan Bentz; Mili Sheth; Peter Cook; Sam Shepard; Sarah Nobles; Shoshona Le; Suxiang Tong; Vivien Dugan; Yvette Unoarumhi                                                                                                                                                                                                                                                                                                                                                                                                                                                                                                                                                |
| EPI_ISL_2018344, EPI_ISL_4071156, EPI_ISL_8258245                                                                                                                                                                                                                                                                                                                                                                                                                                                                                                                                                                                                   | RSUD Arifin Achmad                                                                                                 | National Institute of Health Research and Development                                                                       | Arie Ardiansyah Nugraha; Fajar Nur Sulistiyohadi; Hana Aparsi Pawestri; Hartanti Dian Ikawati; Kartika Dewi Puspa; Krisna Pangesti; Nelly Puspandari; Subangkit; Triyani Soekarso; Vivi Setiawaty                                                                                                                                                                                                                                                                                                                                                                                                                                                                                                                                                                                                                                                                                                                                                                                          |
| EPI_ISL_3541192                                                                                                                                                                                                                                                                                                                                                                                                                                                                                                                                                                                                                                     | RSUD KEBAYORAN BARU                                                                                                | Genomik Solidaritas Indonesia Laboratorium                                                                                  | Annisa Muthiah Sukirman; Anuraj Shankar; Ariel Pradipta; Carissa Sintca Wijaya; Dhahlia Agustina Cahyono; Dwi Oktavia; Gracia Felias Enos Korompis; Junior Dwi Jayanti; Louisa Markus; Meutia Ayuputeri Kumaheri; Neng Hilma Hamidah; Ngabila Salama; Tiranti Vinda; Vania Gavrila Wikasa                                                                                                                                                                                                                                                                                                                                                                                                                                                                                                                                                                                                                                                                                                  |
| EPI_ISL_3070975, EPI_ISL_3160225, EPI_ISL_3466085                                                                                                                                                                                                                                                                                                                                                                                                                                                                                                                                                                                                   | RSUD Raden Mattaaher                                                                                               | Eijkman Institute for Molecular Biology, National Research and Innovation Agency; Raden Mattaaher Regional General Hospital | Amin Soebandrio; Edison Johar; Fery Kusnadi; Frilisata A Yudhaputri; Hidayat Trimarsanto; Iskandar Adnan; Jessica R. Saragih; Khin Saw Myint; Lidwina Priliani; Lydia V. Panggalo; Muhammad Rezki Rasyak; Safarina G Malik; Sotianingsih; Sukma Oktavianthi; Willy Agustine; Yusnidar                                                                                                                                                                                                                                                                                                                                                                                                                                                                                                                                                                                                                                                                                                      |
| EPI_ISL_1046089, EPI_ISL_1046582, EPI_ISL_1070109, EPI_ISL_1101718, EPI_ISL_1102178, EPI_ISL_1190113, EPI_ISL_1243546, EPI_ISL_1265038, EPI_ISL_1265083, EPI_ISL_1326676, EPI_ISL_1344661, EPI_ISL_1365232, EPI_ISL_1374255, EPI_ISL_1389507, EPI_ISL_1411483, EPI_ISL_1536863, EPI_ISL_1698241, EPI_ISL_2004595, EPI_ISL_3050950, EPI_ISL_3098113, EPI_ISL_3381555                                                                                                                                                                                                                                                                                 | Randox Laboratories                                                                                                | Wellcome Sanger Institute for the COVID-19 Genomics UK (COG-UK) Consortium                                                  | Cordelia Langford; David K. Jackson; Dominic Kwiatkowski; Ewan Harrison; Ian Johnston; Jeffrey Barrett; John Sillitoe on behalf of the Wellcome Sanger Institute COVID-19 Surveillance Team; Randox Laboratories and Alex Alderton; Roberto Amato; Sonia Goncalves                                                                                                                                                                                                                                                                                                                                                                                                                                                                                                                                                                                                                                                                                                                         |
| EPI_ISL_2319802, EPI_ISL_2662007                                                                                                                                                                                                                                                                                                                                                                                                                                                                                                                                                                                                                    | Reditus Laboratories                                                                                               | Reditus Laboratories                                                                                                        | Alexa Eichelberger; Cassy Philips; Joshua J. Geltz; M.S.; Ph.D.; Rex Dyer; Robert M. Sgambelluri                                                                                                                                                                                                                                                                                                                                                                                                                                                                                                                                                                                                                                                                                                                                                                                                                                                                                           |
| EPI_ISL_1415399                                                                                                                                                                                                                                                                                                                                                                                                                                                                                                                                                                                                                                     | Reference Laboratory of the Ministry of Health                                                                     | Laboratory of Respiratory Viruses and Measles, Oswaldo Cruz Institute, FIOCRUZ                                              | Alice Sampaio Rocha; Ana Carolina Mendonca; Anna Carolina Paixao; Fernando Motta; Indira Martins; Jessica Edwards; Luciana Appolinario; Marilda Siqueira on behalf of the Fiocruz COVID-19 Genomic Surveillance Network; Paola Resende; Renata Serrano Lopes                                                                                                                                                                                                                                                                                                                                                                                                                                                                                                                                                                                                                                                                                                                               |
| EPI_ISL_5559216                                                                                                                                                                                                                                                                                                                                                                                                                                                                                                                                                                                                                                     | Region 1 Medical Center                                                                                            | Philippine Genome Center                                                                                                    | Alethea R. de Guzman; Alyssa Joyce E. Telles; Anna Ong-Lim; Arienne A. Zamora; Benedict A. Maralit; Carlo M. Lapid; Celia Carlos; Cynthia P. Saloma; Devon Ray Pacial; Diomedes A. Cariño; Edsel Maurice Salvana; El King D. Morado; Elcid Aaron R. Pangilinan; Eva Maria Cutiungco-de la Paz; Francis A. Tablizo; Henrietta Marie Rodriguez; Jaime C. Montoya; Jan Michael C. Yap; Jarvin E. Nipales; Jo-Hannah S. Llamas; John Michael Egana; John Q. Wong; Joshua Gregor A. Dizon; Joshua Jose Endozo; Juan Antonio R. Magalang; Karol Sophia Agape R. Padilla; Kris P. Punayan; Kristina Patriz Dela Cruz; Lindsay Clare D.L. Carandang; Ma. Exanii Planting; Marc Edsel C. Ayes; Maria Rosario Singh-Vergeire; Maria Sofia L. Yangzon; Marielle M. Gamboa; Marissa Alejandria; Niña Francesca Bustamante; Razel Nikka M. Hao; Renato Jacinto Q. Mantaring; Rianna Patricia S. Cruz; Shieila Mae M. Araiza; Yvonne Valerie Austria; Zipporah Mariebelle R. Enriquez; Zyrel V. Mollejon |
| EPI_ISL_5416147                                                                                                                                                                                                                                                                                                                                                                                                                                                                                                                                                                                                                                     | Regional Medical Sciences Center 1 Chiang Mai                                                                      | National Institute of Health, Department of Medical Sciences, Ministry of Public Health, Thailand                           | Archawin Rojanawiwat; Natchaya Khiaadsang; Nuttida Thongpramul; Pakorn Piromtong; Pilailuk Okada; Ratana Tacharoenuang; Sirapaporn Phuyung; Sittiporn Parmmen; Sunthareeya Waichareon; Suratchana Mitrat; Thanutsapa Thanadachakul                                                                                                                                                                                                                                                                                                                                                                                                                                                                                                                                                                                                                                                                                                                                                         |
| EPI_ISL_6182009                                                                                                                                                                                                                                                                                                                                                                                                                                                                                                                                                                                                                                     | Regional Medical Sciences Center 11/1 Phuket                                                                       | National Institute of Health, Department of Medical Sciences, Ministry of Public Health, Thailand                           | Archawin Rojanawiwat; Natchaya Khiaadsang; Nuttida Thongpramul; Pakorn Piromtong; Pilailuk Okada; Sirikanda Wimol; Siripaporn Phuyung; Sunthareeya Waichareon; Suratchana Mitrat; Thanutsapa Thanadachakul                                                                                                                                                                                                                                                                                                                                                                                                                                                                                                                                                                                                                                                                                                                                                                                 |
| EPI_ISL_5030490                                                                                                                                                                                                                                                                                                                                                                                                                                                                                                                                                                                                                                     | Regional Medical Sciences Center8 Udon Thani                                                                       | Division of Genomic Medicine and Innovation support, Department of Medical Sciences, Ministry of Public Health, Thailand    | Archawin Rojanawiwat; Jirapha Pakdee; Natthakul Bunnearng; Nuanjun Wichuchkina; Penpittha Thawong; Pilailuk Akkapaiboon Okada; Pundharika Piboonsiri; Surakameth Mahasirimongkol; Waritta Sawaengdee                                                                                                                                                                                                                                                                                                                                                                                                                                                                                                                                                                                                                                                                                                                                                                                       |
| EPI_ISL_680330, EPI_ISL_1975314                                                                                                                                                                                                                                                                                                                                                                                                                                                                                                                                                                                                                     | Regional Virus Laboratory, Belfast Health and Social Care Trust                                                    | COVID-19 Genomics UK (COG-UK) Consortium                                                                                    | Alison Watt; Clara Cox; Conall McCaughey; David Simpson; Derek Fairley; James McKenna; Mairead Connor; Susan Feeney; Tanya Curran; Zoltan Molnar                                                                                                                                                                                                                                                                                                                                                                                                                                                                                                                                                                                                                                                                                                                                                                                                                                           |
| EPI_ISL_500978                                                                                                                                                                                                                                                                                                                                                                                                                                                                                                                                                                                                                                      | Regional Virus Laboratory, Belfast Health and Social Care Trust                                                    | Wellcome Sanger Institute for the COVID-19 Genomics UK (COG-UK) consortium                                                  | Alison Watt; Clara Cox; Conall McCaughey; Cordelia Langford; David K. Jackson; David Simpson; Derek Fairley; Dominic Kwiatkowski; Ewan Harrison; Ian Johnston; James McKenna; John Sillitoe on behalf of the Wellcome Sanger Institute COVID-19 Surveillance Team ( <a href="http://www.gen.cam.ac.uk/covid-team">http://www.gen.cam.ac.uk/covid-team</a> ); Mairead Connor; Roberto Amato; Sonia Goncalves; Susan Feeney; Tanya Curran; Zoltan Molnar; and Alex Alderton                                                                                                                                                                                                                                                                                                                                                                                                                                                                                                                  |
| EPI_ISL_1394021                                                                                                                                                                                                                                                                                                                                                                                                                                                                                                                                                                                                                                     | Regionalne Centrum Kwiadawstwa i Kwiolecznictwa w Bialymstoku Pracownia Diagnostyki Molekularnej wirusa SARS-CoV-2 | 1. National Institute of Public Health - National Institute of Hygiene; 2. Eurofins Genomics Europe Sequencing GmbH         | ECDC COVID-19 WGS support team; Eurofins Genomics Europe Sequencing Team; Gierczyński Rafal; Sadkowska-Todys Malgorzata; Wolkowicz Tomasz; Zacharczuk Katarzyna                                                                                                                                                                                                                                                                                                                                                                                                                                                                                                                                                                                                                                                                                                                                                                                                                            |
| EPI_ISL_6586644, EPI_ISL_6969308                                                                                                                                                                                                                                                                                                                                                                                                                                                                                                                                                                                                                    | Rejang Medical Centre (Sibu)                                                                                       | Institute of Health and Community Medicine                                                                                  | Chan Chia Jui; Chua Hock Hin; David Perera; Ooi Mong How; Tonni Sia Loong Loong; Wong Jyn Shan                                                                                                                                                                                                                                                                                                                                                                                                                                                                                                                                                                                                                                                                                                                                                                                                                                                                                             |
| EPI_ISL_1510222                                                                                                                                                                                                                                                                                                                                                                                                                                                                                                                                                                                                                                     | Republican Panevezys Hospital                                                                                      | Vilnius University Hospital Santaros Klinikos, Center of Laboratory Medicine                                                | Daniel Naumovas; Dovile Ezerskyte; Gytis Dudas; Ingrida Olendraite; Laimonas Griskevicius; Ligita Raugaite; Mindaugas Stoksus; Monika Katenaite; Rimvydas Norvilas                                                                                                                                                                                                                                                                                                                                                                                                                                                                                                                                                                                                                                                                                                                                                                                                                         |
| EPI_ISL_7156793                                                                                                                                                                                                                                                                                                                                                                                                                                                                                                                                                                                                                                     | Research Education in Disease Diagnosis and Intervention (REDDI) Lab, Clemson University                           | Research Education in Disease Diagnosis and Intervention (REDDI) Lab, Clemson University                                    | Adib Shafi; Brian Krueger; Chloe Emerson; Christopher Parkinson; Christopher Saski; Congyue Peng; Delphine Dean; John Pruitt; Justin Napolitano; Kaitlyn Williams; Keegan Sell; Kylie King; Lax Iyer; Rachel Dango; Rachel Ham; Scott Parker; Stevin Wilson; Sujata Srikanth                                                                                                                                                                                                                                                                                                                                                                                                                                                                                                                                                                                                                                                                                                               |
| EPI_ISL_4716863, EPI_ISL_5543278, EPI_ISL_5543332, EPI_ISL_5543398                                                                                                                                                                                                                                                                                                                                                                                                                                                                                                                                                                                  | Research Institute for Tropical Medicine, Inc. (RITM)                                                              | Philippine Genome Center                                                                                                    | Alethea R. de Guzman; Anna Ong-Lim; Arienne A. Zamora; Benedict A. Maralit; Carlo M. Lapid; Celia Carlos; Cynthia P. Saloma; Devon Ray Pacial; Diomedes A. Cariño; Edsel Maurice Salvana; El King D. Morado; Elcid Aaron R. Pangilinan; Eva Maria Cutiungco-de la Paz; Francis A. Tablizo; Henrietta Marie Rodriguez; Jaime C. Montoya; Jan Michael C. Yap; Jarvin E. Nipales; Jo-Hannah S. Llamas; John Q. Wong; Joshua Gregor A. Dizon; Juan Antonio R. Magalang; Karol Sophia Agape R. Padilla; Kenneth M. Kim; Kris P. Punayan; Kristina Patriz Dela Cruz; Lindsay Clare D.L. Carandang; Ma. Exanii Planting; Marc Edsel C. Ayes; Maria Rosario Singh-Vergeire; Maria Sofia L. Yangzon; Marielle M. Gamboa; Marissa Alejandria; Niña Francesca Bustamante; Razel Nikka M. Hao; Renato Jacinto Q. Mantaring; Rianna Patricia S. Cruz; Shieila Mae M. Araiza; Yvonne Valerie Austria; Zipporah Mariebelle R. Enriquez; Zyrel V. Mollejon                                                 |
| EPI_ISL_2744002, EPI_ISL_2745194, EPI_ISL_2749513, EPI_ISL_2751423, EPI_ISL_2751465, EPI_ISL_2752567, EPI_ISL_2753205, EPI_ISL_2904327, EPI_ISL_3080734, EPI_ISL_3081105, EPI_ISL_3179660, EPI_ISL_3179681, EPI_ISL_3292691, EPI_ISL_3574273, EPI_ISL_3574526, EPI_ISL_3775125, EPI_ISL_3959522, EPI_ISL_3959998, EPI_ISL_4117246, EPI_ISL_4117570, EPI_ISL_4310384, EPI_ISL_4311956, EPI_ISL_4530925, EPI_ISL_4531632, EPI_ISL_4773072, EPI_ISL_4779147, EPI_ISL_5041550, EPI_ISL_6021061, EPI_ISL_6021388, EPI_ISL_6022265, EPI_ISL_6024804, EPI_ISL_6030805, EPI_ISL_6275388, EPI_ISL_7043150, EPI_ISL_7563561, EPI_ISL_7717352, EPI_ISL_8243952 | Respiratory Virus Unit, Microbiology Services Colindale, Public Health England                                     | COVID-19 Genomics UK (COG-UK) Consortium                                                                                    | PHE Covid Sequencing Team                                                                                                                                                                                                                                                                                                                                                                                                                                                                                                                                                                                                                                                                                                                                                                                                                                                                                                                                                                  |
| EPI_ISL_464390, EPI_ISL_609865                                                                                                                                                                                                                                                                                                                                                                                                                                                                                                                                                                                                                      | Respiratory Virus Unit, Microbiology Services Colindale, Public Health England                                     | Respiratory Virus Unit, Microbiology Services Colindale, Public Health England                                              | PHE Covid Sequencing Team                                                                                                                                                                                                                                                                                                                                                                                                                                                                                                                                                                                                                                                                                                                                                                                                                                                                                                                                                                  |
| EPI_ISL_804309                                                                                                                                                                                                                                                                                                                                                                                                                                                                                                                                                                                                                                      | Respiratory Virus Unit, National Infection Service, Public Health England                                          | COVID-19 Genomics UK (COG-UK) Consortium                                                                                    | PHE Covid Sequencing Team                                                                                                                                                                                                                                                                                                                                                                                                                                                                                                                                                                                                                                                                                                                                                                                                                                                                                                                                                                  |
| EPI_ISL_3091946                                                                                                                                                                                                                                                                                                                                                                                                                                                                                                                                                                                                                                     | Respiratory Viruses Branch, Centers for Disease Control and Prevention                                             | Respiratory Viruses Branch, Centers for Disease Control and Prevention                                                      | Anderson, B.; Batra, D.; Bernstein, L.; C.R.; Caravas, J.; Cook; Gerasimova, A.; Gulvick, C.; Howard, D.; Hua, M.; I.A.; Kagan; Lacbawan, F.; Liu, Y.; Livingston, K.; MacCannell, D.; Morrison, S.; Moser, K.; Owen, R.; P.W.; Paden; Paskey, A.; Perez, A.; R.M.; R.V.; Rambo-Martin, B.; Rolando; Rosenthal; S.H.; Sammons, S.; Schmerer, M.; Shlyakhter; Tanpaiboon, P.; Unoarumhi, Y.; Wagner, D.                                                                                                                                                                                                                                                                                                                                                                                                                                                                                                                                                                                     |
| EPI_ISL_6491122, EPI_ISL_7824631                                                                                                                                                                                                                                                                                                                                                                                                                                                                                                                                                                                                                    | Rhode Island Department of Health                                                                                  | Infectious Disease Program, Broad Institute of Harvard and MIT                                                              | Adams, G.; Azevedo, K.; B.L.; B.W.; Bauer, M.; Birren; Carter, A.; Chaluviadi, S.; D.J.; DeRuff, K.; Gladden-Young, A.; Huard, R.; J.E.; K.J.; King, E.; Lagerberg, K.; Lemieux; Loreth, C.; Miller, A.; Normandin, E.; P.C.; Park; Pearlman, L.; Reilly, S.; Rudy, M.; Sabeti; Siddie; Tomkins-Tinch, C.; and MacInnis                                                                                                                                                                                                                                                                                                                                                                                                                                                                                                                                                                                                                                                                    |
| EPI_ISL_2425507                                                                                                                                                                                                                                                                                                                                                                                                                                                                                                                                                                                                                                     | Rhode Island State Health Laboratory                                                                               | Rhode Island State Health Laboratory                                                                                        | Ewa King; Kristin Carpenter-Azevedo; Richard C. Huard                                                                                                                                                                                                                                                                                                                                                                                                                                                                                                                                                                                                                                                                                                                                                                                                                                                                                                                                      |
| EPI_ISL_6002517                                                                                                                                                                                                                                                                                                                                                                                                                                                                                                                                                                                                                                     | Rivers State University Teaching Hospital (RSUTH)                                                                  | Africa Centre for Excellence for Genomics of Infectious Diseases (ACEGID), Redeemer's University                            | A.T.; Abechi; Ajogbasile; Akano; C.A.; C.T.; Eromon; F.V.; Folarin, O.; Happi; I.B.; J.N.; J.U.; K.O.; Kayode; Nosamiefan, I.; Oguzie; Olawoye; Olumade; Olunji; P.E.; P.S.; T.J.; Ugwu; Uwanibe                                                                                                                                                                                                                                                                                                                                                                                                                                                                                                                                                                                                                                                                                                                                                                                           |
| EPI_ISL_5026359, EPI_ISL_9422429, EPI_ISL_6427211, EPI_ISL_6427403, EPI_ISL_6499969, EPI_ISL_7147334, EPI_ISL_7159176, EPI_ISL_7180650, EPI_ISL_7485014, EPI_ISL_7536353, EPI_ISL_7816101, EPI_ISL_7817391, EPI_ISL_7863811, EPI_ISL_8050609, EPI_ISL_8235423, EPI_ISL_8238185, EPI_ISL_8743646                                                                                                                                                                                                                                                                                                                                                     | Rosalind Franklin Laboratory                                                                                       | Wellcome Sanger Institute for the COVID-19 Genomics UK (COG-UK) Consortium                                                  | Cordelia Langford; David K. Jackson; Dominic Kwiatkowski; Donald Fraser; Ewan Harrison; Ian Johnston; Jeffrey Barrett; John Sillitoe on behalf of the Wellcome Sanger Institute COVID-19 Surveillance Team; Rob Howes; Roberto Amato; Sonia Goncalves; Suki Lee; The Rosalind Franklin Laboratory and Alex Alderton                                                                                                                                                                                                                                                                                                                                                                                                                                                                                                                                                                                                                                                                        |
| EPI_ISL_9506563                                                                                                                                                                                                                                                                                                                                                                                                                                                                                                                                                                                                                                     | Royal GD                                                                                                           | Royal GD                                                                                                                    | Remco Dijkman                                                                                                                                                                                                                                                                                                                                                                                                                                                                                                                                                                                                                                                                                                                                                                                                                                                                                                                                                                              |
| EPI_ISL_8109540, EPI_ISL_8109789                                                                                                                                                                                                                                                                                                                                                                                                                                                                                                                                                                                                                    | Ryazan Regional Clinical Consultative and Diagnostic Center                                                        | WHO National Influenza Centre Russian Federation                                                                            | Andrey Komissarov; Artem Fadeev; Daria Danilenko; Dmitry Liznovo; Elena Nabieva; Georgii Bazynkin; Kirill Varchenko; Ksenia Safina; Kseniya Komissarova; Maria Pisareva; Mikhail Bakaev; Nikita Yolshin; Oula Mansour; Tamila Museeva; Veronika Eder                                                                                                                                                                                                                                                                                                                                                                                                                                                                                                                                                                                                                                                                                                                                       |
| EPI_ISL_7710063                                                                                                                                                                                                                                                                                                                                                                                                                                                                                                                                                                                                                                     | SA Pathology                                                                                                       | SA Pathology                                                                                                                | Caitlin Selway; Chuan Kok Lim; Ivan Bastian; Lex Leong; Mark Turra                                                                                                                                                                                                                                                                                                                                                                                                                                                                                                                                                                                                                                                                                                                                                                                                                                                                                                                         |
| EPI_ISL_8377084                                                                                                                                                                                                                                                                                                                                                                                                                                                                                                                                                                                                                                     | SALVE MEDICA Sp. Z o.o. sp. K.                                                                                     | Wojewodzka Stacja Sanitarno-Epidemiologiczna w Lodzi, Oddzial Laboratoryjny Mikrobiologii i Parazytologii                   | Agnieszka Karnowska; Aleksandra Krawczyk; Danuta Bartczak; Elian Terpo; Katarzyna Kosowska; Lucyna Kochanowska; Marta Gawronska; Martyna Matera; Szymon Konkolewski                                                                                                                                                                                                                                                                                                                                                                                                                                                                                                                                                                                                                                                                                                                                                                                                                        |
| EPI_ISL_3908695, EPI_ISL_4272346, EPI_ISL_4506098, EPI_ISL_4506578, EPI_ISL_8540578, EPI_ISL_8626630, EPI_ISL_8627227, EPI_ISL_8628576, EPI_ISL_8731751, EPI_ISL_8803409, EPI_ISL_8894010, EPI_ISL_9084601                                                                                                                                                                                                                                                                                                                                                                                                                                          | SARS-CoV-2 Sequencing Castilla y Leon-Spain Consortium                                                             | SARS-CoV-2 Sequencing Castilla y Leon-Spain Consortium                                                                      | Antonio Orduña-Domingo; Carlos Fuster Foz; Carmen Aldea-Mansilla; Carmen Gimeno Crespo; David Abad; Gabriel March Rosello; Gregoria Megias Lobón; Jose Maria Eiros Bouza; M. Isabel Fernandez-Natal; Marta Dominguez-Gil; Marta Hernandez; María Antonia García Castro; M <sup>ñ</sup> Fe Bredmes-Valdivieso; Noelia Arenal Andrés; Silvia Rojo; Sonsoloe Garcinuño Pérez                                                                                                                                                                                                                                                                                                                                                                                                                                                                                                                                                                                                                  |
| EPI_ISL_1430755, EPI_ISL_1927843, EPI_ISL_2327314, EPI_ISL_2329988, EPI_ISL_2330045, EPI_ISL_2336088, EPI_ISL_2336675, EPI_ISL_2338149, EPI_ISL_2338220, EPI_ISL_2760130, EPI_ISL_2762595, EPI_ISL_2763028, EPI_ISL_2763484, EPI_ISL_2765474, EPI_ISL_2765274, EPI_ISL_2765299, EPI_ISL_2769633, EPI_ISL_2772025, EPI_ISL_2772050, EPI_ISL_3194743, EPI_ISL_3195738, EPI_ISL_3196750, EPI_ISL_3199729, EPI_ISL_3769603, EPI_ISL_3882727, EPI_ISL_3895866, EPI_ISL_3896831, EPI_ISL_4660830, EPI_ISL_4674252, EPI_ISL_4677737, EPI_ISL_4686982, EPI_ISL_4687801, EPI_ISL_4701093, EPI_ISL_4700481, EPI_ISL_57607051                                  | SARS-CoV-2 testing team, National Institute of Infectious Diseases                                                 | Pathogen Genomics Center, National Institute of Infectious Diseases                                                         | ; Daisuke Kobayashi; Hazuka Y Furihata; Hiromizu Takahashi; Hussein H. Aly; Kentaro Itokawa; Kousho Wakae; Makoto Kuroda; Masanori Hashino; Masumichi Saito; Naomi Nojiri; Nozomu Hanaoka; Rina Tanaka; Sana Uchikoba; Takanobu Kato; Tsuguto Fujimoto; Tsuchiyoshi Sekizuka                                                                                                                                                                                                                                                                                                                                                                                                                                                                                                                                                                                                                                                                                                               |
| EPI_ISL_4601836, EPI_ISL_8024604                                                                                                                                                                                                                                                                                                                                                                                                                                                                                                                                                                                                                    | SC (UCO) Igiene e Sanità Pubblica, ASUGI, Trieste                                                                  | ARGO Laboratorio Genomica ed Epigenomica                                                                                    | Barbone F; Basaglia G; Braida C; Busetti M; D'Agaro P; Dal Monego S; De Rosa R; Degasperis M; Fontana F; Forcinetti G; Koncan R; Licastro D; Marcello A; Pipan C; Piscianni E; Segat L                                                                                                                                                                                                                                                                                                                                                                                                                                                                                                                                                                                                                                                                                                                                                                                                     |
| EPI_ISL_1937764                                                                                                                                                                                                                                                                                                                                                                                                                                                                                                                                                                                                                                     | SC Dept of Health and Env. Control-Bureau of Laboratories                                                          | Centers for Disease Control and Prevention Division of Viral Diseases, Pathogen Discovery                                   | Alison Laufer Halpin; Ben L. Rambo-Martin; Clinton R. Paden; Dakota Howard; Darlene Wagner; Dave Wentworth; Dhvani Batra; Jasmine Padilla; Justin Lee; Katie Dillon; Krista Queen; Kristen Knipe; Kristine Lacey; Mark Burroughs; Matthew Schmerer; Mili Sheth; Peter Cook; Sam Shepard; Sarah Nobles; Shoshona Le; Suxiang Tong; Vivien Dugan; Yvette Unoarumhi                                                                                                                                                                                                                                                                                                                                                                                                                                                                                                                                                                                                                           |
| EPI_ISL_5652281, EPI_ISL_5663595                                                                                                                                                                                                                                                                                                                                                                                                                                                                                                                                                                                                                    | SECRETARIA MUNICIPAL DE SAUDE SOROCABA                                                                             | Instituto Butantan                                                                                                          | Antonio Jorge Martins; Claudia Renata dos Santos Barros; David Schlesinger; Debora Boteucio Moretti; Dimas Tadeu Covas; Elaine Cristina Marquize; Elaine Vieira Santos; Evandra Strazza Rodrigues; Heidge Fukumasa; Jayme Augusto de Souza-Neto; José Salvatore Leister Patané; Luiz Alcântara; Luiz Lehmann Coutinho; Maria Carolina Elias; Mateus Lacerda Nogueira; Rafael dos Santos Bezerra; Raul Machado Neto; Rejane Maria Tommasini Grotto; Ricardo Haddad; Sandra Coccuzzo Sampaio Vessoni; Simone                                                                                                                                                                                                                                                                                                                                                                                                                                                                                 |

|                                                                                                                                                                                                                                                                                                                                                                                                                                                                                                                                                                                                                                                                         |                                                                                                         |                                                                                                                                            |                                                                                                                                                                                                                                                                                                                                                                                                                                                                                                                                                                                                                                                                                                                                                                                                                                                                                                                                        |
|-------------------------------------------------------------------------------------------------------------------------------------------------------------------------------------------------------------------------------------------------------------------------------------------------------------------------------------------------------------------------------------------------------------------------------------------------------------------------------------------------------------------------------------------------------------------------------------------------------------------------------------------------------------------------|---------------------------------------------------------------------------------------------------------|--------------------------------------------------------------------------------------------------------------------------------------------|----------------------------------------------------------------------------------------------------------------------------------------------------------------------------------------------------------------------------------------------------------------------------------------------------------------------------------------------------------------------------------------------------------------------------------------------------------------------------------------------------------------------------------------------------------------------------------------------------------------------------------------------------------------------------------------------------------------------------------------------------------------------------------------------------------------------------------------------------------------------------------------------------------------------------------------|
| EPI_ISL_5668793<br>EPI_ISL_1696112                                                                                                                                                                                                                                                                                                                                                                                                                                                                                                                                                                                                                                      | SELAS BC-LAB                                                                                            | Department of Virology, Henri Mondor University Hospital, Assistance Publique Hôpitaux de Paris, Université Paris-Est Créteil, INSERM U955 | Kashima; Svetoslav Nanev Slavov; Vincent Louis Viala<br>Alexandre Soulier; Christophe Rodriguez; Elisabeth Trawinski; Guillaume Gricourt; Jean-Michel Pawlotsky; Melissa N'Debi; Slim Fourati; Vanessa Demontant                                                                                                                                                                                                                                                                                                                                                                                                                                                                                                                                                                                                                                                                                                                       |
| EPI_ISL_2465017                                                                                                                                                                                                                                                                                                                                                                                                                                                                                                                                                                                                                                                         | SELAS CERBALLIANCE Normandie ouest                                                                      | Department of Virology, Henri Mondor University Hospital, Assistance Publique Hôpitaux de Paris, Université Paris-Est Créteil, INSERM U955 | Alexandre Soulier; Christophe Rodriguez; Elisabeth Trawinski; Guillaume Gricourt; Jean-Michel Pawlotsky; Melissa N'Debi; Slim Fourati; Vanessa Demontant                                                                                                                                                                                                                                                                                                                                                                                                                                                                                                                                                                                                                                                                                                                                                                               |
| EPI_ISL_1853675,<br>EPI_ISL_3637166,<br>EPI_ISL_4396560                                                                                                                                                                                                                                                                                                                                                                                                                                                                                                                                                                                                                 | SESARAM                                                                                                 | Instituto Nacional de Saude (INSA)                                                                                                         | Borges et al                                                                                                                                                                                                                                                                                                                                                                                                                                                                                                                                                                                                                                                                                                                                                                                                                                                                                                                           |
| EPI_ISL_2235533                                                                                                                                                                                                                                                                                                                                                                                                                                                                                                                                                                                                                                                         | SIESP CHIETI - DRIVE IN LANCIANO                                                                        | Istituto Zooprofilattico Sperimentale dell'Abruzzo e Molise "G. Caporale"                                                                  | Ancora M; Calistri P; Cammà C; Caporale M; Curini V; Delli Compagni E; Di Domenico M; Di Lollo Valeria; Di Pasquale A; Lorusso A; Mangone I; Marcacci M; Puglia I; Rinaldi A; Savini G; Scialabba S                                                                                                                                                                                                                                                                                                                                                                                                                                                                                                                                                                                                                                                                                                                                    |
| EPI_ISL_2270841                                                                                                                                                                                                                                                                                                                                                                                                                                                                                                                                                                                                                                                         | SIESP DIPARTIMENTO DI PREVENZIONE TERAMO                                                                | Istituto Zooprofilattico Sperimentale dell'Abruzzo e Molise "G. Caporale"                                                                  | Ancora M; Calistri P; Cammà C; Caporale M; Curini V; Delli Compagni E; Di Domenico M; Di Lollo Valeria; Di Pasquale A; Lorusso A; Mangone I; Marcacci M; Puglia I; Rinaldi A; Savini G; Scialabba S                                                                                                                                                                                                                                                                                                                                                                                                                                                                                                                                                                                                                                                                                                                                    |
| EPI_ISL_2564932, EPI_ISL_4490862, EPI_ISL_5197506, EPI_ISL_5197531, EPI_ISL_5197944, EPI_ISL_6073890, EPI_ISL_6073947, EPI_ISL_6478757, EPI_ISL_6479092, EPI_ISL_6756692                                                                                                                                                                                                                                                                                                                                                                                                                                                                                                | see above                                                                                               | National Microbiology Laboratory (NML)                                                                                                     | Alanna Senecal; Amanda Lang; Anna Majer; Anneliese Landgraff; CanCOGeN's metadata curation team; Darian Hole; Elsie Grudesk; Gary Van Domselaar; Grace Seo; Jennifer Tanner; Jessica Minion; Kara Loos; Keith MacKenzie; Kirsten Biggar; Madison Chapel; Meredith Faires; Morag Graham; Natalie Knox; Nathalie Bastien; Philip Mabon; Public Health Agency of Canada CanCOGeN team; Rachel; Rachel DePaulo; Rhiannon Huzarewich; Russell Mandes; Ryan McDonald; Shari Tyson; Timothy Booth; Yan Li                                                                                                                                                                                                                                                                                                                                                                                                                                     |
| EPI_ISL_4602426, EPI_ISL_5844510, EPI_ISL_5844716, EPI_ISL_5845134, EPI_ISL_7160728, EPI_ISL_7657618, EPI_ISL_7985320                                                                                                                                                                                                                                                                                                                                                                                                                                                                                                                                                   | see above                                                                                               | Saskatchewan - Roy Romanow Provincial Laboratory (RRPL)                                                                                    | Alanna Senecal; Amanda Lang; Jessica Minion; Kara Loos; Keith MacKenzie; Meredith Faires; Rachel DePaulo; Roy Romanow Provincial Laboratory - Molecular Diagnostics; Ryan McDonald                                                                                                                                                                                                                                                                                                                                                                                                                                                                                                                                                                                                                                                                                                                                                     |
| EPI_ISL_1544079                                                                                                                                                                                                                                                                                                                                                                                                                                                                                                                                                                                                                                                         | SOC Igiene ed Epidemiologia Clinica, ASUFC, Udine and SC (UCO) Igiene e Sanità Pubblica, ASUGI, Trieste | Istituto di Genomica Applicata                                                                                                             | Corrado Pipan; Davide Scaglione; Eleonora Paparelli; Gabriele Magris; Irena Jurman; Michele Morgante; Pierlanfranco D'Agaro; Vera Vendramin                                                                                                                                                                                                                                                                                                                                                                                                                                                                                                                                                                                                                                                                                                                                                                                            |
| EPI_ISL_1538792                                                                                                                                                                                                                                                                                                                                                                                                                                                                                                                                                                                                                                                         | SP ZOZ USK nr 1 Zaklad Diagnostyki Laboratorijnej                                                       | 1. National Institute of Public Health - National Institute of Hygiene; 2. Eurofins Genomics Europe Sequencing GmbH                        | ECDC COVID-19 WGS support team; Eurofins Genomics Europe Sequencing Team; Gierczyński Rafat; Sadkowska-Todys Małgorzata; Wolkowicz Tomasz; Zacharczuk Katarzyna                                                                                                                                                                                                                                                                                                                                                                                                                                                                                                                                                                                                                                                                                                                                                                        |
| EPI_ISL_5855873                                                                                                                                                                                                                                                                                                                                                                                                                                                                                                                                                                                                                                                         | SPZOZ K-KOZŁE                                                                                           | Wojewódzka Stacja Sanitarno-Epidemiologiczna w Katowicach                                                                                  | Beata Rozwadowska                                                                                                                                                                                                                                                                                                                                                                                                                                                                                                                                                                                                                                                                                                                                                                                                                                                                                                                      |
| EPI_ISL_7478496                                                                                                                                                                                                                                                                                                                                                                                                                                                                                                                                                                                                                                                         | STONY BROOK UNIVERSITY HOSPITAL                                                                         | Wadsworth Center, New York State Department of Health                                                                                      | Alexis Russell; Catharine Prussing; Daryl M. Lamson; Erasmus Schneider; Erica Lasek-Nesselquist; John Kelly; Jonathan Pitnick; Kirsten St. George; Matthew Shudt; Melissa A Leisner; Navjot Singh                                                                                                                                                                                                                                                                                                                                                                                                                                                                                                                                                                                                                                                                                                                                      |
| EPI_ISL_1397415                                                                                                                                                                                                                                                                                                                                                                                                                                                                                                                                                                                                                                                         | SUNY UPSTATE MEDICAL UNIVERSITY                                                                         | Wadsworth Center, New York State Department of Health                                                                                      | Alexis Russel; Daryl M. Lamson; Erasmus Schneider; Erica Lasek-Nesselquist; John Kelly; Jonathan Pitnick; Kirsten St. George; Matthew Shudt; Melissa A Leisner; Navjot Singh                                                                                                                                                                                                                                                                                                                                                                                                                                                                                                                                                                                                                                                                                                                                                           |
| EPI_ISL_2139784,<br>EPI_ISL_4492629,<br>EPI_ISL_5336742,<br>EPI_ISL_7622351                                                                                                                                                                                                                                                                                                                                                                                                                                                                                                                                                                                             | SYNLAB                                                                                                  | GIGA Medical Genomics                                                                                                                      | Bouchra Boujemla; Claire Gourzonès; Cécile Meex; Keith Durkin; Laurent Gillet; Maria Artesi; Marie-Pierre Hayette; Nadine Cambisano; Nathalie Renotte; Olivier Ek; Pierrette Melin; Raphaël Boreux; Sébastien Bontems; Vincent Bours                                                                                                                                                                                                                                                                                                                                                                                                                                                                                                                                                                                                                                                                                                   |
| EPI_ISL_511350,<br>EPI_ISL_1739197                                                                                                                                                                                                                                                                                                                                                                                                                                                                                                                                                                                                                                      | SYNLAB                                                                                                  | Instituto Nacional de Saude (INSA)                                                                                                         | Borges et al                                                                                                                                                                                                                                                                                                                                                                                                                                                                                                                                                                                                                                                                                                                                                                                                                                                                                                                           |
| EPI_ISL_4804769                                                                                                                                                                                                                                                                                                                                                                                                                                                                                                                                                                                                                                                         | SYNLAB GASCOGNE                                                                                         | CNR Virus des Infections Respiratoires - France SUD                                                                                        | Antonin Bal; Bruno Lina; Gregory Destras; Gwendolyne Burfin; Hadrien Regue; Laurence Josset; Martine Valette; Quentin Semanas                                                                                                                                                                                                                                                                                                                                                                                                                                                                                                                                                                                                                                                                                                                                                                                                          |
| EPI_ISL_1437028,<br>EPI_ISL_1723072,<br>EPI_ISL_1851881,<br>EPI_ISL_2110191                                                                                                                                                                                                                                                                                                                                                                                                                                                                                                                                                                                             | SYNLAB Jena Oncoscreen                                                                                  | Robert Koch Institute                                                                                                                      |                                                                                                                                                                                                                                                                                                                                                                                                                                                                                                                                                                                                                                                                                                                                                                                                                                                                                                                                        |
| EPI_ISL_1567416                                                                                                                                                                                                                                                                                                                                                                                                                                                                                                                                                                                                                                                         | SYNLAB MVZ Berlin                                                                                       | Robert Koch Institute                                                                                                                      |                                                                                                                                                                                                                                                                                                                                                                                                                                                                                                                                                                                                                                                                                                                                                                                                                                                                                                                                        |
| EPI_ISL_1213380,<br>EPI_ISL_1567748,<br>EPI_ISL_1572497,<br>EPI_ISL_1729954                                                                                                                                                                                                                                                                                                                                                                                                                                                                                                                                                                                             | SYNLAB MVZ Ettlingen                                                                                    | Robert Koch Institute                                                                                                                      |                                                                                                                                                                                                                                                                                                                                                                                                                                                                                                                                                                                                                                                                                                                                                                                                                                                                                                                                        |
| EPI_ISL_1432622,<br>EPI_ISL_2119608                                                                                                                                                                                                                                                                                                                                                                                                                                                                                                                                                                                                                                     | SYNLAB MVZ Hamburg                                                                                      | Robert Koch Institute                                                                                                                      |                                                                                                                                                                                                                                                                                                                                                                                                                                                                                                                                                                                                                                                                                                                                                                                                                                                                                                                                        |
| EPI_ISL_1440646,<br>EPI_ISL_1566169,<br>EPI_ISL_1639561,<br>EPI_ISL_2118901,<br>EPI_ISL_2267424,<br>EPI_ISL_2267537                                                                                                                                                                                                                                                                                                                                                                                                                                                                                                                                                     | SYNLAB MVZ Heidelberg                                                                                   | Robert Koch Institute                                                                                                                      |                                                                                                                                                                                                                                                                                                                                                                                                                                                                                                                                                                                                                                                                                                                                                                                                                                                                                                                                        |
| EPI_ISL_1213771, EPI_ISL_1218348, EPI_ISL_1218402, EPI_ISL_1352036, EPI_ISL_1574317, EPI_ISL_1574909, EPI_ISL_1645268, EPI_ISL_1645682, EPI_ISL_1729173, EPI_ISL_1729217, EPI_ISL_2316098, EPI_ISL_2387497, EPI_ISL_2387500, EPI_ISL_2469579, EPI_ISL_5399207, EPI_ISL_5905327, EPI_ISL_6467168, EPI_ISL_7106882, EPI_ISL_7440133, EPI_ISL_7749156, EPI_ISL_8247576, EPI_ISL_8677765,<br>EPI_ISL_8685009, EPI_ISL_9108258                                                                                                                                                                                                                                               | see above                                                                                               | Robert Koch Institute                                                                                                                      |                                                                                                                                                                                                                                                                                                                                                                                                                                                                                                                                                                                                                                                                                                                                                                                                                                                                                                                                        |
| EPI_ISL_1572418, EPI_ISL_1641474, EPI_ISL_1642149, EPI_ISL_1646776, EPI_ISL_1720611, EPI_ISL_1723617, EPI_ISL_1723931, EPI_ISL_1845279, EPI_ISL_1845470, EPI_ISL_1849959, EPI_ISL_2108125, EPI_ISL_2114595, EPI_ISL_2116560, EPI_ISL_2126740, EPI_ISL_2266775, EPI_ISL_2267005, EPI_ISL_2631666, EPI_ISL_2631683, EPI_ISL_2635258, EPI_ISL_3044716, EPI_ISL_3892946, EPI_ISL_4041067,<br>EPI_ISL_4228938, EPI_ISL_4443249, EPI_ISL_4443642, EPI_ISL_4608704, EPI_ISL_4613752, EPI_ISL_4935614, EPI_ISL_6200167, EPI_ISL_6443987, EPI_ISL_6713198, EPI_ISL_6958376, EPI_ISL_7083482, EPI_ISL_7754436, EPI_ISL_7754618, EPI_ISL_7761507, EPI_ISL_7766106, EPI_ISL_8225524 | see above                                                                                               | Robert Koch Institute                                                                                                                      |                                                                                                                                                                                                                                                                                                                                                                                                                                                                                                                                                                                                                                                                                                                                                                                                                                                                                                                                        |
| EPI_ISL_1849748                                                                                                                                                                                                                                                                                                                                                                                                                                                                                                                                                                                                                                                         | SYNLAB MVZ Neustadt a. d. Weinstraße                                                                    | Robert Koch Institute                                                                                                                      |                                                                                                                                                                                                                                                                                                                                                                                                                                                                                                                                                                                                                                                                                                                                                                                                                                                                                                                                        |
| EPI_ISL_1568358, EPI_ISL_1568406, EPI_ISL_1852514, EPI_ISL_2113525, EPI_ISL_2117166, EPI_ISL_3712894, EPI_ISL_3879947, EPI_ISL_4229727, EPI_ISL_4229992, EPI_ISL_4617840                                                                                                                                                                                                                                                                                                                                                                                                                                                                                                | see above                                                                                               | Robert Koch Institute                                                                                                                      |                                                                                                                                                                                                                                                                                                                                                                                                                                                                                                                                                                                                                                                                                                                                                                                                                                                                                                                                        |
| EPI_ISL_1151393, EPI_ISL_1153562, EPI_ISL_3501003, EPI_ISL_3876706, EPI_ISL_3877846, EPI_ISL_4226326, EPI_ISL_4443027, EPI_ISL_5662874, EPI_ISL_8230931                                                                                                                                                                                                                                                                                                                                                                                                                                                                                                                 | see above                                                                                               | Robert Koch Institute                                                                                                                      |                                                                                                                                                                                                                                                                                                                                                                                                                                                                                                                                                                                                                                                                                                                                                                                                                                                                                                                                        |
| EPI_ISL_5764746                                                                                                                                                                                                                                                                                                                                                                                                                                                                                                                                                                                                                                                         | Saga Prefectural Institute of Public Health and Pharmaceutical Research                                 | Fukuoka Institute of Health and Environmental Sciences                                                                                     | Akihito Minami; Akira Ohishi; Asako Nakamura; Chiharu Katamune; Eri Kasahara; Hiroaki Shigemura; Ikumi Sato; Kentaro Itokawa; Makoto Kuroda; Masanori Hashino; Mitsuhiro Hamasaki; Rina Tanaka; Saori Ueda; Takayuki Kobayashi; Tsuyoshi Sekizuka; Yoshiki Etoh; Yuki Ashizuka; Yuki Carl                                                                                                                                                                                                                                                                                                                                                                                                                                                                                                                                                                                                                                              |
| EPI_ISL_3872102,<br>EPI_ISL_4653889                                                                                                                                                                                                                                                                                                                                                                                                                                                                                                                                                                                                                                     | Saitama Institute of Public Health                                                                      | Saitama Institute of Public Health                                                                                                         | Eri Aonuma; Hayato Ehara; Kentaro Itokawa; Makoto Kuroda; Masanori Hashino; Rina Tanaka; Satoshi Daisaki; Tsuyoshi Sekizuka                                                                                                                                                                                                                                                                                                                                                                                                                                                                                                                                                                                                                                                                                                                                                                                                            |
| EPI_ISL_1431148                                                                                                                                                                                                                                                                                                                                                                                                                                                                                                                                                                                                                                                         | Saitama Prefectural Institute of Public Health                                                          | Pathogen Genomics Center, National Institute of Infectious Diseases                                                                        | Kentaro Itokawa; Makoto Kuroda; Masanori Hashino; Rina Tanaka; Tsuyoshi Sekizuka                                                                                                                                                                                                                                                                                                                                                                                                                                                                                                                                                                                                                                                                                                                                                                                                                                                       |
| EPI_ISL_2230924, EPI_ISL_2341037, EPI_ISL_2349987, EPI_ISL_2350127, EPI_ISL_2779635, EPI_ISL_6960775, EPI_ISL_7565718, EPI_ISL_7887198, EPI_ISL_7887209, EPI_ISL_8187016                                                                                                                                                                                                                                                                                                                                                                                                                                                                                                | see above                                                                                               | Instituto Nacional de Medicina Genomica                                                                                                    | Abraham Campos-Romero; Cedro-Tanda A; Cisneros-Villanueva M; Cruz-Islas Jazmin; Escobar-Arrazola; Escobar-Arrazola MA; Garnica-Lopez Dora; Gonzalez-Barrera D; Herrera-Montalvo LA; Hidalgo-Miranda A; Luna-Ruiz Marco; M; Mendoza-Vargas A; Moreno-Camacho José Luis; Mungua-Garza P; Orjuela-Rodríguez M; Ramirez-Vega O; Rangel-DeLeon D; Reyes-Grajeda JP; Rodriguez-Gallegos Jorge; Yair Alfaro-Mora                                                                                                                                                                                                                                                                                                                                                                                                                                                                                                                              |
| EPI_ISL_5986856                                                                                                                                                                                                                                                                                                                                                                                                                                                                                                                                                                                                                                                         | Salud Digna, A.C                                                                                        | Andersen lab at Scripps Research                                                                                                           | Abraham Garcia Gil; Jose Luis Moreno Camacho; Marco Antonio Luna Ruiz-Esparza; Miguel A. Fernandez Rojas; SEARCH Alliance with Abraham Campos Romero                                                                                                                                                                                                                                                                                                                                                                                                                                                                                                                                                                                                                                                                                                                                                                                   |
| EPI_ISL_5546136                                                                                                                                                                                                                                                                                                                                                                                                                                                                                                                                                                                                                                                         | San Antonio City of Ilagan Hospital                                                                     | Philippine Genomics Center                                                                                                                 | Alethea R. de Guzman; Anna Ong-Lim; Arianne A. Zamora; Benedict A. Maralit; Carlo M. Lapid; Celia Carlos; Cynthia P. Saloma; Devon Ray Pacial; Diomedes A. Cariño; Edsel Maurice Salvana; El King D. Morado; Elcid Aaron R. Pangilinan; Eva Maria Cutiongco-de la Paz; Francis A. Tablizo; Henrietta Marie Rodriguez; Jaime C. Montoya; Jan Michael C. Yap; Jarvin E. Nipales; Jo-Hannah S. Llamas; John Q. Wong; Joshua Gregor A. Dizon; Juan Antonio R. Magalang; Karol Sophia Agape R. Padilla; Kenneth M. Kim; Kris P. Punayan; Kristina Patriz Dela Cruz; Lindsay Clare D.L. Carandang; Ma. Exanii Plantig; Marc Edsel C. Ayes; Maria Rosario Singh-Vergeire; Maria Sofia L. Yanzon; Mariette M. Gamba; Marissa Alejandria; Niña Francesca Bustamante; Razel Nikka M. Hao; Renato Jacinto Q. Mantaring; Rianna Patricia S. Cruz; Shiela Mae M. Araiza; Yvonne Valerie Austria; Ziporah Mariebelle R. Enriquez; Zyrrel V. Mollejon |
| EPI_ISL_494592, EPI_ISL_667039, EPI_ISL_1469003, EPI_ISL_1532053, EPI_ISL_2231161, EPI_ISL_2329389, EPI_ISL_2329567, EPI_ISL_2422746, EPI_ISL_2422773, EPI_ISL_2422906, EPI_ISL_2422931, EPI_ISL_2422995                                                                                                                                                                                                                                                                                                                                                                                                                                                                | see above                                                                                               | Andersen lab at Scripps Research                                                                                                           | Brett Austin; Jovan Shephard; SEARCH Alliance San Diego with Ashleigh Murphy; SEARCH Alliance San Diego with Tracy Basler                                                                                                                                                                                                                                                                                                                                                                                                                                                                                                                                                                                                                                                                                                                                                                                                              |
| EPI_ISL_3246226,<br>EPI_ISL_3842024                                                                                                                                                                                                                                                                                                                                                                                                                                                                                                                                                                                                                                     | San Diego County Public Health Laboratory                                                               | San Diego County Public Health Laboratory                                                                                                  | Ashleigh Murphy Schafer; Brett Austin                                                                                                                                                                                                                                                                                                                                                                                                                                                                                                                                                                                                                                                                                                                                                                                                                                                                                                  |
| EPI_ISL_979064,<br>EPI_ISL_1234935,<br>EPI_ISL_1701502                                                                                                                                                                                                                                                                                                                                                                                                                                                                                                                                                                                                                  | Santa Clara County Public Health Laboratory                                                             | Chan-Zuckerberg Biohub                                                                                                                     | CZB Cliahub Consortium                                                                                                                                                                                                                                                                                                                                                                                                                                                                                                                                                                                                                                                                                                                                                                                                                                                                                                                 |
| EPI_ISL_832402                                                                                                                                                                                                                                                                                                                                                                                                                                                                                                                                                                                                                                                          | Santa Clara County Public Health Laboratory                                                             | Santa Clara County Public Health Laboratory                                                                                                | Santa Clara County Public Health Department                                                                                                                                                                                                                                                                                                                                                                                                                                                                                                                                                                                                                                                                                                                                                                                                                                                                                            |
| EPI_ISL_4435312,<br>EPI_ISL_5393988                                                                                                                                                                                                                                                                                                                                                                                                                                                                                                                                                                                                                                     | Saratoga Hospital Laboratory                                                                            | Wadsworth Center, New York State Department of Health                                                                                      | Alexis Russell; Catharine Prussing; Daryl M. Lamson; Erasmus Schneider; Erica Lasek-Nesselquist; John Kelly; Jonathan Pitnick; Kirsten St. George; Matthew Shudt; Melissa A Leisner; Navjot Singh                                                                                                                                                                                                                                                                                                                                                                                                                                                                                                                                                                                                                                                                                                                                      |

|                                                                                                                                                                                                                                                                                                                                                                                     |                                                                                                                                                                                                                                 |                                                                                                                                              |                                                                                                                                                                                                                                                                                                                                                                                                                                                                                                                                                                                                                                                                                                                                                                                                                                                                                                                                                                                          |
|-------------------------------------------------------------------------------------------------------------------------------------------------------------------------------------------------------------------------------------------------------------------------------------------------------------------------------------------------------------------------------------|---------------------------------------------------------------------------------------------------------------------------------------------------------------------------------------------------------------------------------|----------------------------------------------------------------------------------------------------------------------------------------------|------------------------------------------------------------------------------------------------------------------------------------------------------------------------------------------------------------------------------------------------------------------------------------------------------------------------------------------------------------------------------------------------------------------------------------------------------------------------------------------------------------------------------------------------------------------------------------------------------------------------------------------------------------------------------------------------------------------------------------------------------------------------------------------------------------------------------------------------------------------------------------------------------------------------------------------------------------------------------------------|
| EPI_ISL_1081731, EPI_ISL_3757159, EPI_ISL_3757194, EPI_ISL_3757354, EPI_ISL_3757375, EPI_ISL_3757417, EPI_ISL_4269122, EPI_ISL_5570270, EPI_ISL_5986611                                                                                                                                                                                                                             | Scripps Medical Laboratory                                                                                                                                                                                                      | Andersen lab at Scripps Research                                                                                                             | Ellen Stefanski; Ian Mchardy; SEARCH Alliance San Diego with Michael Quigley                                                                                                                                                                                                                                                                                                                                                                                                                                                                                                                                                                                                                                                                                                                                                                                                                                                                                                             |
| see above                                                                                                                                                                                                                                                                                                                                                                           |                                                                                                                                                                                                                                 |                                                                                                                                              |                                                                                                                                                                                                                                                                                                                                                                                                                                                                                                                                                                                                                                                                                                                                                                                                                                                                                                                                                                                          |
| EPI_ISL_2894700, EPI_ISL_2894707, EPI_ISL_2894805, EPI_ISL_5441361, EPI_ISL_5441386, EPI_ISL_5441483, EPI_ISL_5441495, EPI_ISL_5441575, EPI_ISL_5441643                                                                                                                                                                                                                             | Sealfon Laboratory, Department of Neurology, Icahn School of Medicine at Mount Sinai                                                                                                                                            | van Bakel Laboratory, Genetics and Genomics Sciences, Icahn School of Medicine at Mount Sinai                                                | Adriana van de Guchte; Ana S. Gonzalez-Reiche; Andrew G. Letizia; Bryan T. Grenfell; C. Jessica E. Metcalf; Carl W. Goforth; Chad K. Porter; Clare M. Miller; Darci R. Smith; Dawn L. Weir; Edgar Nunez; Ernesto Santa Ana; Francisco Malagon; Gregory K. Rice; Gregory R. Smith; Hala Alshammary; Hanna Pinca; Harm van Bakel; Hua Wei Chen; Irene Ramos; Jan J. Marayag; Jayeta Dutta; Kimberly A. Bishop-Lilly; Kyle A. Long; Lindsay A. Glang; Logan J. Voegtly; Mary-Catherine George; Megan A. Schilling; Michael S. Termini; Olga G. Troyanskaya; Peifang Sun; Rachel S. G. Sealfon; Regina Z. Cer; Rhonda A. Lizewski; Sang Woo Park; Sindhu Vangeti; Stephen E. Lizewski; Stuart C. Sealfon; Sugiharto; Venugopalan D. Nair; Victor A; Yongchao Ge; Zenab Khan                                                                                                                                                                                                                  |
| EPI_ISL_849508                                                                                                                                                                                                                                                                                                                                                                      | Seattle Flu Study                                                                                                                                                                                                               | Seattle Flu Study                                                                                                                            | Amanda Adler; Barry R. Lutz; Benjamin Pelle; Caitlin R. Wolf; Chris D. Frazar; Deborah A. Nickerson; Elisabeth Brandstetter; Helen Y. Chu; Janet A. Englund; Jay Shendure; Jover Lee; Kairsten Fay; Kirsten Lacombe; Lea M. Starita; Mark J. Rieder; Matthew Richardson; Matthew Thompson; Melissa Truong; Michael Boeckh; Michael Famulare; Misja Ilicisin; Peter D. Han; Thomas R. Sibley; Trevor Bedford                                                                                                                                                                                                                                                                                                                                                                                                                                                                                                                                                                              |
| EPI_ISL_6910504                                                                                                                                                                                                                                                                                                                                                                     | Seattle VA Medical Center                                                                                                                                                                                                       | Boise VA Medical Center                                                                                                                      | Mark Holodniy on behalf of VA SEQFORCE; US Department of Veterans Affairs                                                                                                                                                                                                                                                                                                                                                                                                                                                                                                                                                                                                                                                                                                                                                                                                                                                                                                                |
| EPI_ISL_5801986                                                                                                                                                                                                                                                                                                                                                                     | Secretaria Municipal De Saude De Andradina                                                                                                                                                                                      | Instituto Butantan                                                                                                                           | Antonio Jorge Martins; Claudia Renata dos Santos Barros; David Schlesinger; Debora Botequio Moretti; Dimas Tadeu Covas; Elaine Cristina Marqueze; Elaine Vieira Santos; Evandra Strazza Rodrigues; Heidge Fukumasu; Jayme Augusto de Souza-Neto; José Salvatore Leister Patané; Luiz Alcantara; Luiz Lehmann Coutinho; Maria Carolina Elias; Maurício Lacerda Nogueira; Rafael dos Santos Bezerra; Raul Machado Neto; Rejane Maria Tommasini Grotto; Ricardo Haddad; Sandra Coccuzzo Sampaio Vessoni; Simone Kashima; Svetoslav Nanev Slavov; Vincent Louis Viala                                                                                                                                                                                                                                                                                                                                                                                                                        |
| EPI_ISL_5394006, EPI_ISL_5394060, EPI_ISL_5659468, EPI_ISL_5687098, EPI_ISL_5927379, EPI_ISL_6568318, EPI_ISL_6568323, EPI_ISL_6568624, EPI_ISL_6568630, EPI_ISL_6914055, EPI_ISL_6914076, EPI_ISL_6914096, EPI_ISL_6914112, EPI_ISL_6914315, EPI_ISL_6914319, EPI_ISL_6914341, EPI_ISL_7696987, EPI_ISL_7697000                                                                    | Sema4                                                                                                                                                                                                                           | Sema4                                                                                                                                        | Angela Yannes; Bisram Deocharan; Feras Hantash; Matthew Capozziello; Rui Gu; Victoria Parkinson; Zdenek Markovic                                                                                                                                                                                                                                                                                                                                                                                                                                                                                                                                                                                                                                                                                                                                                                                                                                                                         |
| see above                                                                                                                                                                                                                                                                                                                                                                           |                                                                                                                                                                                                                                 |                                                                                                                                              |                                                                                                                                                                                                                                                                                                                                                                                                                                                                                                                                                                                                                                                                                                                                                                                                                                                                                                                                                                                          |
| EPI_ISL_4920257                                                                                                                                                                                                                                                                                                                                                                     | Servicio Microbiología H.U. Dr. Negrín                                                                                                                                                                                          | Servicio Microbiología H.U. Dr. Negrín                                                                                                       | Ana Bordes Benitez; Bartolomé Gómez Arroyo; Francisco Javier Chamizo López                                                                                                                                                                                                                                                                                                                                                                                                                                                                                                                                                                                                                                                                                                                                                                                                                                                                                                               |
| EPI_ISL_2179752, EPI_ISL_2179795, EPI_ISL_6324919, EPI_ISL_6960131, EPI_ISL_6960141                                                                                                                                                                                                                                                                                                 | Servicio Microbiología Hospital La Paz                                                                                                                                                                                          | Servicio Microbiología Hospital La Paz                                                                                                       | Elie Dahdouh; Fernando Lázaro; Iván Bloise; Jesús Mingorance Cruz; Rubén Cáceres                                                                                                                                                                                                                                                                                                                                                                                                                                                                                                                                                                                                                                                                                                                                                                                                                                                                                                         |
| EPI_ISL_8689384, EPI_ISL_9189462                                                                                                                                                                                                                                                                                                                                                    | Servicio Virosis Respiratorias-Departamento Virología-INEI                                                                                                                                                                      | Instituto Nacional Enfermedades Infecciosas C.G.Malbran                                                                                      | Avaro M.; Baumeister E.; Benedetti E.; Campos J.; Cisterna D.; Dattero ME; De Belder D.; Haim MS.; Lorenzo F.; Molina V.; Perandones C.; Poklepovich T.; Pontoriero A.; Russo M.; Sanchez Loria J.; Tuduri E.                                                                                                                                                                                                                                                                                                                                                                                                                                                                                                                                                                                                                                                                                                                                                                            |
| EPI_ISL_2283656                                                                                                                                                                                                                                                                                                                                                                     | Servicio de Microbiología Hospital Ramon y Cajal                                                                                                                                                                                | Servicio de Microbiología Hospital Ramon y Cajal                                                                                             | Galan JC; Martinez L. Abreu M; Ponce M; y Gonzalez-Alba JM                                                                                                                                                                                                                                                                                                                                                                                                                                                                                                                                                                                                                                                                                                                                                                                                                                                                                                                               |
| EPI_ISL_1383078, EPI_ISL_1392993, EPI_ISL_1393043, EPI_ISL_1393534, EPI_ISL_1922275, EPI_ISL_2934818, EPI_ISL_2934830, EPI_ISL_3265832, EPI_ISL_5655829, EPI_ISL_8000109, EPI_ISL_8000334                                                                                                                                                                                           | Servicio de Microbiología Clínica (Complejo Hospitalario de Navarra, Pamplona)                                                                                                                                                  | Centro de Secuenciación NASERTIC                                                                                                             | Ana Miqueleiz; Ana Navascués; Carmen Ezpeleta Baquedano                                                                                                                                                                                                                                                                                                                                                                                                                                                                                                                                                                                                                                                                                                                                                                                                                                                                                                                                  |
| see above                                                                                                                                                                                                                                                                                                                                                                           |                                                                                                                                                                                                                                 |                                                                                                                                              |                                                                                                                                                                                                                                                                                                                                                                                                                                                                                                                                                                                                                                                                                                                                                                                                                                                                                                                                                                                          |
| EPI_ISL_1009070                                                                                                                                                                                                                                                                                                                                                                     | Servicio de Microbiología Clínica (Complejo Hospitalario de Navarra, Pamplona), Instituto de Investigación Sanitaria de Navarra (IdiSNA)                                                                                        | SeqCOVID-SPAIN consortium/IBV(CSIC)                                                                                                          | Ana Miqueleiz and SeqCOVID-SPAIN consortium; Ana Navascués; Carmen Ezpeleta Baquedano                                                                                                                                                                                                                                                                                                                                                                                                                                                                                                                                                                                                                                                                                                                                                                                                                                                                                                    |
| EPI_ISL_933733                                                                                                                                                                                                                                                                                                                                                                      | Servicio de Microbiología Hospital Ramón y Cajal                                                                                                                                                                                | Servicio de Microbiología Hospital Ramón y Cajal                                                                                             | Concepción Rodríguez; JC Galán; José M Gonzalez-Alba; Laura Martínez; Luz Leticia Olavarrieta; Melanie Abreu; Rafael Cantón; Val F Lanza                                                                                                                                                                                                                                                                                                                                                                                                                                                                                                                                                                                                                                                                                                                                                                                                                                                 |
| EPI_ISL_468817                                                                                                                                                                                                                                                                                                                                                                      | Servicio de Microbiología, Hospital Miguel Servet, Zaragoza                                                                                                                                                                     | SeqCOVID-SPAIN consortium/IBV(CSIC)                                                                                                          | Alexander Trislancho Baró; Ana Milagro; Antonio Rezusta López; Nieves Martínez Cameo and SeqCOVID-SPAIN consortium; Yolanda Gracia Gataloup                                                                                                                                                                                                                                                                                                                                                                                                                                                                                                                                                                                                                                                                                                                                                                                                                                              |
| EPI_ISL_2465913                                                                                                                                                                                                                                                                                                                                                                     | Servicio de Microbiología, Hospital Universitario Central de Asturias                                                                                                                                                           | SeqCOVID-SPAIN consortium/IBV(CSIC)                                                                                                          | Cristián Castelló Abietar; Jose A. Boga; Marta Elena Álvarez-Argüelles; Santiago Melón and SeqCOVID-SPAIN consortium; Susana Rojo-Alba                                                                                                                                                                                                                                                                                                                                                                                                                                                                                                                                                                                                                                                                                                                                                                                                                                                   |
| EPI_ISL_1219797                                                                                                                                                                                                                                                                                                                                                                     | Servicio de Microbiología, Hospital Universitario Son Espases                                                                                                                                                                   | SeqCOVID-SPAIN consortium/IBV(CSIC)                                                                                                          | Antonio Oliver and SeqCOVID-SPAIN consortium; Carla López-Causapé; Jordi Reina                                                                                                                                                                                                                                                                                                                                                                                                                                                                                                                                                                                                                                                                                                                                                                                                                                                                                                           |
| EPI_ISL_2439989                                                                                                                                                                                                                                                                                                                                                                     | Servicio de Microbiología. Hospital Clínico Universitario de Valencia                                                                                                                                                           | SeqCOVID-SPAIN consortium/IBV(CSIC)                                                                                                          | David Navarro Ortega; Eliseo Albert Vicent; Ignacio Torres and SeqCOVID-SPAIN consortium                                                                                                                                                                                                                                                                                                                                                                                                                                                                                                                                                                                                                                                                                                                                                                                                                                                                                                 |
| EPI_ISL_796150                                                                                                                                                                                                                                                                                                                                                                      | Servicio de Microbiología, Hospital General Universitario de Castellón                                                                                                                                                          | SeqCOVID-SPAIN consortium/IBV(CSIC)                                                                                                          | María Dolores Tirado Balaquer and SeqCOVID-SPAIN consortium; Rosario Moreno Muñoz                                                                                                                                                                                                                                                                                                                                                                                                                                                                                                                                                                                                                                                                                                                                                                                                                                                                                                        |
| EPI_ISL_452637                                                                                                                                                                                                                                                                                                                                                                      | Servicio de Microbiología, Hospital Universitario Donostia. OSI Donostialdea, Área de Enfermedades Infecciosas, Grupo de Infección Respiratoria y Resistencia Antimicrobiana, Instituto de Investigación Sanitaria Biodonostia. | SeqCOVID-SPAIN consortium/IBV(CSIC)                                                                                                          | Gustavo Cilla; Jose Maria Marimón and SeqCOVID-SPAIN consortium; Luis Piñeiro; Mllagrosa Montes                                                                                                                                                                                                                                                                                                                                                                                                                                                                                                                                                                                                                                                                                                                                                                                                                                                                                          |
| EPI_ISL_2834513, EPI_ISL_6090970, EPI_ISL_7603949                                                                                                                                                                                                                                                                                                                                   | Shamir Medical Center (Asaf Harofe)                                                                                                                                                                                             | Shamir Medical Center (Asaf Harofe)                                                                                                          | Abu Hamad Ramzia; Adina Bar Chaim; Anna Vishnevsky; Chen Weiner; Nir Rainy; Patricia Benveniste-Lekovitz; Reut Sorek Abramovich; Yevgeni Yegorov                                                                                                                                                                                                                                                                                                                                                                                                                                                                                                                                                                                                                                                                                                                                                                                                                                         |
| EPI_ISL_5316301, EPI_ISL_6685174, EPI_ISL_6686857                                                                                                                                                                                                                                                                                                                                   | Shared Hospital Laboratory                                                                                                                                                                                                      | Shared Hospital Laboratory                                                                                                                   | Christie Vermeiren; Finlay Maguire; Kevin Katz; Patryk Aftanas; Robert Kozak; Samira Mubareka                                                                                                                                                                                                                                                                                                                                                                                                                                                                                                                                                                                                                                                                                                                                                                                                                                                                                            |
| EPI_ISL_730127, EPI_ISL_1081375, EPI_ISL_2231271, EPI_ISL_2422836, EPI_ISL_2422867, EPI_ISL_2422879, EPI_ISL_2422894, EPI_ISL_2835533, EPI_ISL_2835557, EPI_ISL_2835566, EPI_ISL_3543711, EPI_ISL_3543753, EPI_ISL_3543756, EPI_ISL_3543816, EPI_ISL_3543833, EPI_ISL_3543946, EPI_ISL_3544047, EPI_ISL_3544115, EPI_ISL_6257532, EPI_ISL_6257565, EPI_ISL_7337633, EPI_ISL_7886243 | Sharp HealthCare Laboratory                                                                                                                                                                                                     | Andersen lab at Scripps Research                                                                                                             | Art Mendoza; Cathy Woerle; Jacquelyn Berumen; Liam McGinnis; Omid Bakhtar; SEARCH Alliance San Diego with Aaron Harding                                                                                                                                                                                                                                                                                                                                                                                                                                                                                                                                                                                                                                                                                                                                                                                                                                                                  |
| see above                                                                                                                                                                                                                                                                                                                                                                           |                                                                                                                                                                                                                                 |                                                                                                                                              |                                                                                                                                                                                                                                                                                                                                                                                                                                                                                                                                                                                                                                                                                                                                                                                                                                                                                                                                                                                          |
| EPI_ISL_406593, EPI_ISL_406594, EPI_ISL_406595                                                                                                                                                                                                                                                                                                                                      | Shenzhen Key Laboratory of Pathogen and Immunity, National Clinical Research Center for Infectious Disease, Shenzhen Third People's Hospital                                                                                    | Shenzhen Key Laboratory of Pathogen and Immunity, National Clinical Research Center for Infectious Disease, Shenzhen Third People's Hospital | Chenguang Shen; Haixia Zheng; Li Xing; Yang Yang; Yingxia Liu; Zhixiang Xu                                                                                                                                                                                                                                                                                                                                                                                                                                                                                                                                                                                                                                                                                                                                                                                                                                                                                                               |
| EPI_ISL_406592                                                                                                                                                                                                                                                                                                                                                                      | Shenzhen Third People's Hospital                                                                                                                                                                                                | Shenzhen Key Laboratory of Pathogen and Immunity, National Clinical Research Center for Infectious Disease, Shenzhen Third People's Hospital | Chenguang Shen; Haixia Zheng; Li Xing; Yang Yang; Yingxia Liu; Zhixiang Xu                                                                                                                                                                                                                                                                                                                                                                                                                                                                                                                                                                                                                                                                                                                                                                                                                                                                                                               |
| EPI_ISL_4655057                                                                                                                                                                                                                                                                                                                                                                     | Shimane Prefectural Institute of Public Health and Environmental Science                                                                                                                                                        | Shimane Prefectural Institute of Public Health and Environmental Science                                                                     | Aiko Fukuma; Kentaro Itokawa; Makoto Kuroda; Masanori Hashino; Naoki Fujisawa; Rie Onishi; Rina Tanaka; Tsuyoshi Sekizuka; Yurie Kanba                                                                                                                                                                                                                                                                                                                                                                                                                                                                                                                                                                                                                                                                                                                                                                                                                                                   |
| EPI_ISL_8995106                                                                                                                                                                                                                                                                                                                                                                     | Shizuoka Institute of Environment and Hygiene                                                                                                                                                                                   | Japan COVID-19 Open Data Consortium                                                                                                          | Atsushi Toyoda; Hiromi Nagaoka; Hiroshi Mori; Ituro Inoue; Katsuyuki Ishigami; Ken Kurokawa; Masanori Arita; Satomi Asano; Shigeiki Mitsunaga; Takamoto Fujisawa; Yasuhiro Tanizawa; Yono Arita                                                                                                                                                                                                                                                                                                                                                                                                                                                                                                                                                                                                                                                                                                                                                                                          |
| EPI_ISL_2464563                                                                                                                                                                                                                                                                                                                                                                     | Singapore General Hospital                                                                                                                                                                                                      | Singapore General Hospital                                                                                                                   | Chayaporn Suphaviat; James Sim Heng Chik; Karrie Ko; Kenneth Xin Long Chan; Kern Rei Chng; Kian Sing Chan; Kun Lee Lim; Lynette Oon; Niranjan Nagarajan; Nurdyana Abdul Rahman; Sui Sin Goh                                                                                                                                                                                                                                                                                                                                                                                                                                                                                                                                                                                                                                                                                                                                                                                              |
| EPI_ISL_5030112                                                                                                                                                                                                                                                                                                                                                                     | Sirindhorn Hospital                                                                                                                                                                                                             | Division of Genomic Medicine and Innovation support, Department of Medical Sciences, Ministry of Public Health, Thailand                     | Archawin Rojanawitwat; Jirapha Pakdee; Natthakul Bunneang; Nuanjun Wichukhinda; Penpitcha Thawong; Pilailuk Akkapaiboon Okada; Pundharika Piboonsiri; Surakameth Mahasirimongkol; Waritta Sawaengdee                                                                                                                                                                                                                                                                                                                                                                                                                                                                                                                                                                                                                                                                                                                                                                                     |
| EPI_ISL_4932894, EPI_ISL_5672101, EPI_ISL_8229576, EPI_ISL_9212673                                                                                                                                                                                                                                                                                                                  | Sonic - Bioscientia - MVZ Labor Saar GmbH                                                                                                                                                                                       | Robert Koch Institute                                                                                                                        |                                                                                                                                                                                                                                                                                                                                                                                                                                                                                                                                                                                                                                                                                                                                                                                                                                                                                                                                                                                          |
| EPI_ISL_8229080                                                                                                                                                                                                                                                                                                                                                                     | Sonic - Dr. Staber & Kollegen GmbH München                                                                                                                                                                                      | Robert Koch Institute                                                                                                                        |                                                                                                                                                                                                                                                                                                                                                                                                                                                                                                                                                                                                                                                                                                                                                                                                                                                                                                                                                                                          |
| EPI_ISL_2260667, EPI_ISL_2761457, EPI_ISL_3881495, EPI_ISL_9219319                                                                                                                                                                                                                                                                                                                  | Sonic - Labor Dr. von Froreich GmbH                                                                                                                                                                                             | Robert Koch Institute                                                                                                                        |                                                                                                                                                                                                                                                                                                                                                                                                                                                                                                                                                                                                                                                                                                                                                                                                                                                                                                                                                                                          |
| EPI_ISL_1282171, EPI_ISL_8221005, EPI_ISL_8412494, EPI_ISL_8665938                                                                                                                                                                                                                                                                                                                  | Sonic - Labor Staber Dresden (Klipphausen)                                                                                                                                                                                      | Robert Koch Institute                                                                                                                        |                                                                                                                                                                                                                                                                                                                                                                                                                                                                                                                                                                                                                                                                                                                                                                                                                                                                                                                                                                                          |
| EPI_ISL_2108862                                                                                                                                                                                                                                                                                                                                                                     | Sonic - Labor Staber Nurnberg                                                                                                                                                                                                   | Robert Koch Institute                                                                                                                        |                                                                                                                                                                                                                                                                                                                                                                                                                                                                                                                                                                                                                                                                                                                                                                                                                                                                                                                                                                                          |
| EPI_ISL_1436107, EPI_ISL_1847491, EPI_ISL_4441532, EPI_ISL_4936248                                                                                                                                                                                                                                                                                                                  | Sonic - MVZ Medizinisches Labor Bremen GmbH                                                                                                                                                                                     | Robert Koch Institute                                                                                                                        |                                                                                                                                                                                                                                                                                                                                                                                                                                                                                                                                                                                                                                                                                                                                                                                                                                                                                                                                                                                          |
| EPI_ISL_1182126                                                                                                                                                                                                                                                                                                                                                                     | Sonora Quest Laboratories                                                                                                                                                                                                       | TGen North                                                                                                                                   | Ashlyn Pfeiffer; Chris French; Darrin Lemmer; Dave Engelthaler; Hayley Yaglom; Heather Centner; Jolene Bowers; The Arizona COVID Genomics Union (ACGU)                                                                                                                                                                                                                                                                                                                                                                                                                                                                                                                                                                                                                                                                                                                                                                                                                                   |
| EPI_ISL_1017004                                                                                                                                                                                                                                                                                                                                                                     | South Dakota Public Health Laboratory                                                                                                                                                                                           | University of Minnesota Genomics Center                                                                                                      | Benjamin Auch; Corbin Dirkx; Daryl M. Gohl; Jaquelyn Kuriger-Laber; John Garbe; and Chris Carlson                                                                                                                                                                                                                                                                                                                                                                                                                                                                                                                                                                                                                                                                                                                                                                                                                                                                                        |
| EPI_ISL_767885, EPI_ISL_845786                                                                                                                                                                                                                                                                                                                                                      | South Eastern Area Laboratory Services (SEALS)                                                                                                                                                                                  | NSW Health Pathology - Institute of Clinical Pathology and Medical Research; Westmead Hospital; University of Sydney                         | CIDM-PH et al.                                                                                                                                                                                                                                                                                                                                                                                                                                                                                                                                                                                                                                                                                                                                                                                                                                                                                                                                                                           |
| EPI_ISL_5552430                                                                                                                                                                                                                                                                                                                                                                     | Southern Isabela Medical Center Molecular Diagnostic & Research Laboratory (SIMC - MDRL)                                                                                                                                        | Philippine Genome Center                                                                                                                     | Alethea R. de Guzman; Alyssa Joyce E. Telles; Anna Ong-Lim; Arianne A. Zamora; Benedict A. Maralit; Carlo M. Lapid; Celia Carlos; Cynthia P. Saloma; Devon Ray Pacial; Diomedes A. Cariño; Edsel Maurice Salvana; El King D. Morado; Elcid Aaron R. Pangilinan; Eva Maria Cutiongco-de la Paz; Francis A. Tablizo; Henrietta Marie Rodriguez; Jaime C. Montoya; Jan Michael C. Yap; Jarvin E. Nipales; Jo-Hannah S. Llamas; John Michael Egana; John Q. Wong; Joshua Gregor A. Dizon; Joshua Jose Endozo; Juan Antonio R. Magalang; Karol Sophia Agape R. Padilla; Kris P. Punayan; Kristina Patriz Dela Cruz; Lindsay Clare D.L. Carandang; Ma. Exanal Planting; Marc Edsel C. Ayes; Maria Rosario Singh-Vergeire; Maria Sofia L. Yangzon; Marielle M. Gamboa; Marissa Alejandria; Niña Francesca Bustamante; Razel Nikka M. Hao; Renato Jacinto Q. Mantaring; Rianna Patricia S. Cruz; Shiela Mae M. Araza; Yvonne Valerie Austria; Zipporah Mariebelle R. Enriquez; Zyre! V. Mollejon |
| EPI_ISL_2136988                                                                                                                                                                                                                                                                                                                                                                     | Spital Limmattal                                                                                                                                                                                                                | Institute of Medical Virology                                                                                                                | Alexandra Trkola; Annette AudigZ; Catharine Aquino; Cyril Shah; Daniel Ehrsam; Gabriela Ziltener; Guido Bloembergen; Hubert Rehrauer; Isabel Střýrmer; Joel Wirz; Jon Huder; Jürg Bšni; Kevin Steiner; Maria Gr'nberg; Maryam Zaheri; Michael Huber; Riccarda Capaul; Stefan Schmutz; Verena Kufner; Weihong Qi                                                                                                                                                                                                                                                                                                                                                                                                                                                                                                                                                                                                                                                                          |



|                                                                                                                                                                                                                                                                                                                                                                                                                                                                                                                                                                                                                                                                                                                                                                                                                                                                                                                                                                                                                                                                                                                                                                                                                                                                                                                                                                                                                                                                                                                                                                                                                                                                                                                                  |                                                                                                                                                           |                                                                                                                                                             |                                                                                                                                                                                                                                                                                                                                                                                                                                                                                                                                                                                                                                                                                                                                                                                                                                                                                                                                                                                                                                                                                                 |
|----------------------------------------------------------------------------------------------------------------------------------------------------------------------------------------------------------------------------------------------------------------------------------------------------------------------------------------------------------------------------------------------------------------------------------------------------------------------------------------------------------------------------------------------------------------------------------------------------------------------------------------------------------------------------------------------------------------------------------------------------------------------------------------------------------------------------------------------------------------------------------------------------------------------------------------------------------------------------------------------------------------------------------------------------------------------------------------------------------------------------------------------------------------------------------------------------------------------------------------------------------------------------------------------------------------------------------------------------------------------------------------------------------------------------------------------------------------------------------------------------------------------------------------------------------------------------------------------------------------------------------------------------------------------------------------------------------------------------------|-----------------------------------------------------------------------------------------------------------------------------------------------------------|-------------------------------------------------------------------------------------------------------------------------------------------------------------|-------------------------------------------------------------------------------------------------------------------------------------------------------------------------------------------------------------------------------------------------------------------------------------------------------------------------------------------------------------------------------------------------------------------------------------------------------------------------------------------------------------------------------------------------------------------------------------------------------------------------------------------------------------------------------------------------------------------------------------------------------------------------------------------------------------------------------------------------------------------------------------------------------------------------------------------------------------------------------------------------------------------------------------------------------------------------------------------------|
| EPI_ISL_3489169, EPI_ISL_3489206, EPI_ISL_4197352, EPI_ISL_2859978                                                                                                                                                                                                                                                                                                                                                                                                                                                                                                                                                                                                                                                                                                                                                                                                                                                                                                                                                                                                                                                                                                                                                                                                                                                                                                                                                                                                                                                                                                                                                                                                                                                               | Springfield-Greene County Health Department<br>St. Anne's University Hospital Brno<br>Sta. Ana Hospital                                                   | University of Minnesota Genomics Center<br>University Hospital Brno, CMGB<br>Philippine Genome Center                                                       | Corbin Dirix; Daryl M. Gohl; Jaquelyn Kuriger-Laber; John Garbe<br>Bezdeck Matej; Dolejska Monika; Kristyna Dufkova; Lengerova Martina; Svaton Jan<br>Alethea R. de Guzman; Anna Ong-Lim; Arianne A. Zamora; Benedict A. Maralit; Carlo M. Lapid; Celia Carlos; Devon Ray Pacial; Diomedes A. Carino; Edsel Maurice Salvaña; El King D. Morado; Elcid Aaron R. Pangilinan; Eva Maria Cutiongco-de la Paz; Francis A. Tablizo; Henrietta Marie Rodriguez; Jaime C. Montoya; Jan Michael C. Yap; Jarvin E. Nipales; Jo-Hannah S. Llamas; John Q. Wong; Joshua Gregor A. Dizon; Juan Antonio R. Magalang; Karol Sophia Agape R. Padilla; Kenneth M. Kim; Kris P. Punayan; Krisitna Patriz Dela Cruz; Lindsay Claire D.L. Carandang; Ma. Exanil Plantig; Marc Edsel C. Ayes; Maria Rosario Singh-Vergeire and Cynthia P. Saloma; Maria Sofia L. Yanzon; Marielle M Gamboa; Marissa Alejandria; Nina Francesca Bustamante; Razel Nikka M. Hao; Renato Jacinto Q. Mantaring; Rianna Patricia S. Cruz; Sheila Mae M. Araza; Yvonne Valerie Austria; Zipporah Mariebelle R. Enriquez; Zryel V. Mollejon |
| EPI_ISL_2027205, EPI_ISL_3050291, EPI_ISL_3722187, EPI_ISL_5158204                                                                                                                                                                                                                                                                                                                                                                                                                                                                                                                                                                                                                                                                                                                                                                                                                                                                                                                                                                                                                                                                                                                                                                                                                                                                                                                                                                                                                                                                                                                                                                                                                                                               | Stanford Health Care                                                                                                                                      | Stanford University School of Medicine, Clinical Virology Laboratory                                                                                        | Becky jiang; Bernadette Troung; ChunHong Huang; Daniel Solis; Fiona Yamamoto; Fumiko Yamamoto; James Zehnder; Malaya K. Sahoo; Mamdouh Sibai; Michelle Verghese; Nathan Hammond; Selamawit Bihon; Suzette Santos; and Benjamin A. Pinsky                                                                                                                                                                                                                                                                                                                                                                                                                                                                                                                                                                                                                                                                                                                                                                                                                                                        |
| EPI_ISL_5110639, EPI_ISL_8322562                                                                                                                                                                                                                                                                                                                                                                                                                                                                                                                                                                                                                                                                                                                                                                                                                                                                                                                                                                                                                                                                                                                                                                                                                                                                                                                                                                                                                                                                                                                                                                                                                                                                                                 | StarMed Healthcare                                                                                                                                        | UNC Charlotte Environmental Monitoring Laboratory                                                                                                           | Cynthia Gibas; Jannatul Ferdous; Jessica Schlueter; Juan Bolanos; Kevin Lambirth; Sam Kunkleman; Samuel Kunkleman; Torri Weathers                                                                                                                                                                                                                                                                                                                                                                                                                                                                                                                                                                                                                                                                                                                                                                                                                                                                                                                                                               |
| EPI_ISL_3149260, EPI_ISL_3939901, EPI_ISL_4518760, EPI_ISL_4890916, EPI_ISL_4927935, EPI_ISL_5162059, EPI_ISL_5349010, EPI_ISL_7325661, EPI_ISL_7487176                                                                                                                                                                                                                                                                                                                                                                                                                                                                                                                                                                                                                                                                                                                                                                                                                                                                                                                                                                                                                                                                                                                                                                                                                                                                                                                                                                                                                                                                                                                                                                          | see above                                                                                                                                                 | State Hygienic Laboratory at the University of Iowa                                                                                                         | Alankar Kampoowale; Anna Yakos; Benfer; Cindy Toll; Davis Rieckenberg; Erik Twait; Jeff; Jeff Benfer; Kris Eveland; Krishnaveni Sompallae; Kristen Zanon; Mariah Knutson; Mohammed Allam; Valerie Reeb; Wes Hottel                                                                                                                                                                                                                                                                                                                                                                                                                                                                                                                                                                                                                                                                                                                                                                                                                                                                              |
| EPI_ISL_1515856, EPI_ISL_4345673, EPI_ISL_5515867, EPI_ISL_5516176, EPI_ISL_7986133                                                                                                                                                                                                                                                                                                                                                                                                                                                                                                                                                                                                                                                                                                                                                                                                                                                                                                                                                                                                                                                                                                                                                                                                                                                                                                                                                                                                                                                                                                                                                                                                                                              | State Laboratories Division, Hawaii State Department of Health                                                                                            | State Laboratories Division, Hawaii State Department of Health                                                                                              | Ayana Garnet; Daniel Strange; Drew Kuwazaki; Edward Desmond; Pamela O'Brien; Razvan Sultana                                                                                                                                                                                                                                                                                                                                                                                                                                                                                                                                                                                                                                                                                                                                                                                                                                                                                                                                                                                                     |
| EPI_ISL_2378441, EPI_ISL_3050101                                                                                                                                                                                                                                                                                                                                                                                                                                                                                                                                                                                                                                                                                                                                                                                                                                                                                                                                                                                                                                                                                                                                                                                                                                                                                                                                                                                                                                                                                                                                                                                                                                                                                                 | State Testing Facility                                                                                                                                    | Altius Institute for Biomedical Research                                                                                                                    | Alex Isner; Alex Nguyen; Amanda Gale; Audra Johnson; Clem Green; Daniel Bates; Eric Thorland; Jacob Rodriguez; Jean Robinson; Rebecca Nelson; Jessica Kunder; John Stamatoyannopoulos; Joshua Richards; Julia Wald; Kneshay Harper; Lauren Mitchell; Mark Frecker; Matt Hartman; Michael Buckley; Muhammad Halimun; Jemma Bruders; Sade Padrao; Sofia Olsson; Tobias Ragoczy                                                                                                                                                                                                                                                                                                                                                                                                                                                                                                                                                                                                                                                                                                                    |
| EPI_ISL_1708515                                                                                                                                                                                                                                                                                                                                                                                                                                                                                                                                                                                                                                                                                                                                                                                                                                                                                                                                                                                                                                                                                                                                                                                                                                                                                                                                                                                                                                                                                                                                                                                                                                                                                                                  | State collection of viruses, N.F. Gamaleya National Research Center for Epidemiology and Microbiology of the Ministry of Health of the Russian Federation | Laboratory of genome analysis, N.F. Gamaleya National Research Center for Epidemiology and Microbiology of the Ministry of Health of the Russian Federation | Andrey Botikov; Anna Kovyrshina; Daria Grousova; Denis Logunov; Ekaterina Aksenova; Inna Dolzhikova; Marina Kunda; Natalia Ryzhova; Olga Voronina                                                                                                                                                                                                                                                                                                                                                                                                                                                                                                                                                                                                                                                                                                                                                                                                                                                                                                                                               |
| EPI_ISL_6782118, EPI_ISL_8156361                                                                                                                                                                                                                                                                                                                                                                                                                                                                                                                                                                                                                                                                                                                                                                                                                                                                                                                                                                                                                                                                                                                                                                                                                                                                                                                                                                                                                                                                                                                                                                                                                                                                                                 | State of New Hampshire Public Health Laboratories                                                                                                         | State of New Hampshire Public Health Laboratories                                                                                                           | Caitlin Mercier; Chris Benton; Jinfeng Li; Juan Bolanos; Xinglu Zhang                                                                                                                                                                                                                                                                                                                                                                                                                                                                                                                                                                                                                                                                                                                                                                                                                                                                                                                                                                                                                           |
| EPI_ISL_2684757                                                                                                                                                                                                                                                                                                                                                                                                                                                                                                                                                                                                                                                                                                                                                                                                                                                                                                                                                                                                                                                                                                                                                                                                                                                                                                                                                                                                                                                                                                                                                                                                                                                                                                                  | Statens Serum Institut Bioinformatics and Microbial Genomics                                                                                              | Statens Serum Institut Bioinformatics and Microbial Genomics                                                                                                | Danish Covid-19 Genome Consortium                                                                                                                                                                                                                                                                                                                                                                                                                                                                                                                                                                                                                                                                                                                                                                                                                                                                                                                                                                                                                                                               |
| EPI_ISL_1615620                                                                                                                                                                                                                                                                                                                                                                                                                                                                                                                                                                                                                                                                                                                                                                                                                                                                                                                                                                                                                                                                                                                                                                                                                                                                                                                                                                                                                                                                                                                                                                                                                                                                                                                  | Subang Public Health                                                                                                                                      | West Java Health Laboratory; School of Life Sciences and Technology, Institut Teknologi Bandung                                                             | Aulia Saraswati Wicaksono; Azzania Fibriani; Cut Nur Cinthia Alamanda; Ema Rahmawati; Karimatu Khoirunnisa; Miftahul Faridi; Rifky Waluyajati Rachman; Rini Robiani; Ryan Bayusantika Ristandi                                                                                                                                                                                                                                                                                                                                                                                                                                                                                                                                                                                                                                                                                                                                                                                                                                                                                                  |
| EPI_ISL_4063062                                                                                                                                                                                                                                                                                                                                                                                                                                                                                                                                                                                                                                                                                                                                                                                                                                                                                                                                                                                                                                                                                                                                                                                                                                                                                                                                                                                                                                                                                                                                                                                                                                                                                                                  | Sultan Qaboos University Hospital, Department of Microbiology & Immunology, Molecular Biology Section                                                     | KU Leuven, Rega Institute, Clinical and Epidemiological Virology                                                                                            | Abdullah Balkhair; Azza Alqayoudhi; Faiza Alnamaani; Fatma BaAlawi; Ishraq Al Kindi; Khuloud Al Maamari; Omar Balkhair; Piet Maes; Tony Wawina-Bokalanga; Zakarya Almuharri                                                                                                                                                                                                                                                                                                                                                                                                                                                                                                                                                                                                                                                                                                                                                                                                                                                                                                                     |
| EPI_ISL_2589981                                                                                                                                                                                                                                                                                                                                                                                                                                                                                                                                                                                                                                                                                                                                                                                                                                                                                                                                                                                                                                                                                                                                                                                                                                                                                                                                                                                                                                                                                                                                                                                                                                                                                                                  | Suomen terveystalo Oy                                                                                                                                     | Expert Microbiology, National Institute for Health and Welfare                                                                                              | Carita Savolainen-Kopra; Erika Lindh; Haider al-Hello; Jani Halkilahti; Kirsi Liitsola; Niina Ikonen; Olli Vapalahti; Pekka Ellonen; Phuoc Truong; Päivi Laurila; Ravi Kant; Sari Hannula; Soile Blomqvist; Teemu Smura                                                                                                                                                                                                                                                                                                                                                                                                                                                                                                                                                                                                                                                                                                                                                                                                                                                                         |
| EPI_ISL_5544058                                                                                                                                                                                                                                                                                                                                                                                                                                                                                                                                                                                                                                                                                                                                                                                                                                                                                                                                                                                                                                                                                                                                                                                                                                                                                                                                                                                                                                                                                                                                                                                                                                                                                                                  | Supercare Medical Services, Inc.                                                                                                                          | Philippine Genome Center                                                                                                                                    | Alethea R. de Guzman; Anna Ong-Lim; Arianne A. Zamora; Benedict A. Maralit; Carlo M. Lapid; Celia Carlos; Cynthia P. Saloma; Devon Ray Pacial; Diomedes A. Carño; Edsel Maurice Salvana; El King D. Morado; Elcid Aaron R. Pangilinan; Eva Maria Cutiongco-de la Paz; Francis A. Tablizo; Henrietta Marie Rodriguez; Jaime C. Montoya; Jan Michael C. Yap; Jarvin E. Nipales; Jo-Hannah S. Llamas; John Q. Wong; Joshua Gregor A. Dizon; Juan Antonio R. Magalang; Karol Sophia Agape R. Padilla; Kenneth M. Kim; Kris P. Punayan; Kristina Patriz Dela Cruz; Lindsay Clare D.L. Carandang; Ma. Exanil Plantig; Marc Edsel C. Ayes; Maria Rosario Singh-Vergeire; Maria Sofia L. Yanzon; Marielle M. Gamboa; Marissa Alejandria; Nria Francesca Bustamante; Razel Nikka M. Hao; Renato Jacinto Q. Mantaring; Rianna Patricia S. Cruz; Shiela Mae M. Araza; Yvonne Valerie Austria; Zipporah Mariebelle R. Enriquez; Zryel V. Mollejon                                                                                                                                                           |
| EPI_ISL_6931567                                                                                                                                                                                                                                                                                                                                                                                                                                                                                                                                                                                                                                                                                                                                                                                                                                                                                                                                                                                                                                                                                                                                                                                                                                                                                                                                                                                                                                                                                                                                                                                                                                                                                                                  | Supratech Micropath Laboratory Research Institute Pvt Ltd, Ahmedabad                                                                                      | Gujarat Biotechnology Research Centre                                                                                                                       | Apurvashin Puvav; Bhadeshshin Gohil; Chaitanya Joshi; Dinesh Kumar; Janvi Ravai; Madhvi Joshi; Nimesh Patel; Nitin Savaliya; Nitin Shukla; Priyank Chavda; Ramesh Pandit; Shiva; Sonal Sharma; Zarna Patel                                                                                                                                                                                                                                                                                                                                                                                                                                                                                                                                                                                                                                                                                                                                                                                                                                                                                      |
| EPI_ISL_3122947                                                                                                                                                                                                                                                                                                                                                                                                                                                                                                                                                                                                                                                                                                                                                                                                                                                                                                                                                                                                                                                                                                                                                                                                                                                                                                                                                                                                                                                                                                                                                                                                                                                                                                                  | Surgut Country Clinical Hospital                                                                                                                          | WHO National Influenza Centre Russian Federation                                                                                                            | Alexey Masharsky; Andrey Komissarov; Artem Fadeev; Daria Danilenko; Dmitry Lioznov; Elena Nabieva; Georgii Bazykin; Kirill Varchenko; Ksenia Safina; Kseniya Komissarova; Maria Baturova; Maria Pisareva; Mikhail Bakaev; Nikita Yolshin; Oula Mansour; Tamila Musaeva; Veronika Ender                                                                                                                                                                                                                                                                                                                                                                                                                                                                                                                                                                                                                                                                                                                                                                                                          |
| EPI_ISL_8312361                                                                                                                                                                                                                                                                                                                                                                                                                                                                                                                                                                                                                                                                                                                                                                                                                                                                                                                                                                                                                                                                                                                                                                                                                                                                                                                                                                                                                                                                                                                                                                                                                                                                                                                  | Sweden, Vastragotland, Unilabs                                                                                                                            | Unilabs, Eskilstuna, Sweden                                                                                                                                 | Emma Arvidsson                                                                                                                                                                                                                                                                                                                                                                                                                                                                                                                                                                                                                                                                                                                                                                                                                                                                                                                                                                                                                                                                                  |
| EPI_ISL_3690924                                                                                                                                                                                                                                                                                                                                                                                                                                                                                                                                                                                                                                                                                                                                                                                                                                                                                                                                                                                                                                                                                                                                                                                                                                                                                                                                                                                                                                                                                                                                                                                                                                                                                                                  | Sweden/Sodermanland/Unilabs                                                                                                                               | Unilabs/Eskilstuna/Sweden                                                                                                                                   | Emma Arvidsson                                                                                                                                                                                                                                                                                                                                                                                                                                                                                                                                                                                                                                                                                                                                                                                                                                                                                                                                                                                                                                                                                  |
| EPI_ISL_5104006                                                                                                                                                                                                                                                                                                                                                                                                                                                                                                                                                                                                                                                                                                                                                                                                                                                                                                                                                                                                                                                                                                                                                                                                                                                                                                                                                                                                                                                                                                                                                                                                                                                                                                                  | Sweden/Vastragotland/Unilabs                                                                                                                              | Unilabs/Eskilstuna/Sweden                                                                                                                                   | Emma Arvidsson                                                                                                                                                                                                                                                                                                                                                                                                                                                                                                                                                                                                                                                                                                                                                                                                                                                                                                                                                                                                                                                                                  |
| EPI_ISL_1192655, EPI_ISL_1197301, EPI_ISL_1197599, EPI_ISL_1197616, EPI_ISL_1199806, EPI_ISL_1200073, EPI_ISL_1418527, EPI_ISL_1418965, EPI_ISL_1420186, EPI_ISL_1600008, EPI_ISL_1601704, EPI_ISL_1604795, EPI_ISL_1607140, EPI_ISL_1617453, EPI_ISL_1617829, EPI_ISL_1618835, EPI_ISL_1619022, EPI_ISL_1676572, EPI_ISL_1676979, EPI_ISL_1748599, EPI_ISL_1808271, EPI_ISL_1898968, EPI_ISL_1899498, EPI_ISL_1899546, EPI_ISL_1901115, EPI_ISL_1903473, EPI_ISL_1903555, EPI_ISL_1903629, EPI_ISL_2033586, EPI_ISL_2197163, EPI_ISL_2206244, EPI_ISL_2206292, EPI_ISL_2206320, EPI_ISL_2208274, EPI_ISL_2208432, EPI_ISL_2209697, EPI_ISL_2210182, EPI_ISL_2212438, EPI_ISL_2214124, EPI_ISL_2214910, EPI_ISL_2219955, EPI_ISL_2221198, EPI_ISL_2221104, EPI_ISL_2255197, EPI_ISL_2256946, EPI_ISL_2257463, EPI_ISL_2278825, EPI_ISL_2411123, EPI_ISL_2411173, EPI_ISL_2411662, EPI_ISL_2411678, EPI_ISL_2412429, EPI_ISL_2414986, EPI_ISL_2583501, EPI_ISL_2619522, EPI_ISL_2619905, EPI_ISL_2620557, EPI_ISL_2794546, EPI_ISL_2888949, EPI_ISL_3158389, EPI_ISL_3159177, EPI_ISL_3159263, EPI_ISL_3782566, EPI_ISL_3782913, EPI_ISL_3783498, EPI_ISL_3784374, EPI_ISL_3784446, EPI_ISL_3785838, EPI_ISL_3786073, EPI_ISL_3786221, EPI_ISL_3786743, EPI_ISL_3789265, EPI_ISL_3790055, EPI_ISL_3790952, EPI_ISL_3793302, EPI_ISL_3793827, EPI_ISL_3794387, EPI_ISL_3794828, EPI_ISL_3985098, EPI_ISL_3989864, EPI_ISL_4109187, EPI_ISL_4109263, EPI_ISL_4336655, EPI_ISL_4471023, EPI_ISL_4471166, EPI_ISL_4854967, EPI_ISL_4859108, EPI_ISL_5362241, EPI_ISL_6176499, EPI_ISL_6176746, EPI_ISL_6180138, EPI_ISL_6709685, EPI_ISL_6710904, EPI_ISL_6882890, EPI_ISL_6883290, EPI_ISL_6883588, EPI_ISL_6884299, EPI_ISL_7873536 | Alma Brolund; Maria Lind Karlberg; Maximilian Riess; Swedish national genomic surveillance program of SARS-CoV-2                                          |                                                                                                                                                             |                                                                                                                                                                                                                                                                                                                                                                                                                                                                                                                                                                                                                                                                                                                                                                                                                                                                                                                                                                                                                                                                                                 |
| see above                                                                                                                                                                                                                                                                                                                                                                                                                                                                                                                                                                                                                                                                                                                                                                                                                                                                                                                                                                                                                                                                                                                                                                                                                                                                                                                                                                                                                                                                                                                                                                                                                                                                                                                        | Swedish national genomic surveillance program of SARS-CoV-2                                                                                               | The Public Health Agency of Sweden                                                                                                                          | Ana Rita Goncalves; Emmanouil Dermitzakis; Henri Pegeot; Ioannis Xenarios; Keith Harshman; Laurent Kaiser; Lorenzo Cerutti; Melyssa Elies; Samuel Cordey                                                                                                                                                                                                                                                                                                                                                                                                                                                                                                                                                                                                                                                                                                                                                                                                                                                                                                                                        |
| EPI_ISL_857502                                                                                                                                                                                                                                                                                                                                                                                                                                                                                                                                                                                                                                                                                                                                                                                                                                                                                                                                                                                                                                                                                                                                                                                                                                                                                                                                                                                                                                                                                                                                                                                                                                                                                                                   | Swiss National Reference Centre for Influenza                                                                                                             | Swiss National Reference Centre for Influenza                                                                                                               |                                                                                                                                                                                                                                                                                                                                                                                                                                                                                                                                                                                                                                                                                                                                                                                                                                                                                                                                                                                                                                                                                                 |
| EPI_ISL_3185213                                                                                                                                                                                                                                                                                                                                                                                                                                                                                                                                                                                                                                                                                                                                                                                                                                                                                                                                                                                                                                                                                                                                                                                                                                                                                                                                                                                                                                                                                                                                                                                                                                                                                                                  | Sydney South West Pathology Service (SSWPS) - Royal Prince Alfred Hospital - NSW Health Pathology                                                         | NSW Health Pathology - Institute of Clinical Pathology and Medical Research; Westmead Hospital; University of Sydney                                        | CIDM-PH et al.                                                                                                                                                                                                                                                                                                                                                                                                                                                                                                                                                                                                                                                                                                                                                                                                                                                                                                                                                                                                                                                                                  |
| EPI_ISL_1319280, EPI_ISL_1685391, EPI_ISL_1686250, EPI_ISL_2788847, EPI_ISL_3507150, EPI_ISL_4171813, EPI_ISL_7899300, EPI_ISL_8481935, EPI_ISL_8699509                                                                                                                                                                                                                                                                                                                                                                                                                                                                                                                                                                                                                                                                                                                                                                                                                                                                                                                                                                                                                                                                                                                                                                                                                                                                                                                                                                                                                                                                                                                                                                          | see above                                                                                                                                                 | Synlab Eesti OÜ                                                                                                                                             | Abroi A.; Avi R.; Dotsenko L.; Epstein J.; Hoidmets D.; Huik E.; Härma M-A.; Jaanisoo E.; Kaarna K.; Kallas E.; Koppel I.; Kuzmin I.; Lahesaare A.; Liidia Dotsenko et al.; Lutsar I.; Metspalu M.; Milani L.; Naaber P.; Niglas H.; Oopkaup O.E.; Pauskar M.; Peterson H.; Päll T.; Ratnik K.; Raudvere U.; Reisberg T.; Sadikova O.; Sepp H.; Shablinskaja A.; Suija H.; Talas U.G.; Truusalu K.                                                                                                                                                                                                                                                                                                                                                                                                                                                                                                                                                                                                                                                                                              |
| EPI_ISL_1566617, EPI_ISL_4043320, EPI_ISL_4043732, EPI_ISL_4931881                                                                                                                                                                                                                                                                                                                                                                                                                                                                                                                                                                                                                                                                                                                                                                                                                                                                                                                                                                                                                                                                                                                                                                                                                                                                                                                                                                                                                                                                                                                                                                                                                                                               | Synlab MVZ Augsburg                                                                                                                                       | Robert Koch Institute                                                                                                                                       |                                                                                                                                                                                                                                                                                                                                                                                                                                                                                                                                                                                                                                                                                                                                                                                                                                                                                                                                                                                                                                                                                                 |
| EPI_ISL_5309711, EPI_ISL_4395221                                                                                                                                                                                                                                                                                                                                                                                                                                                                                                                                                                                                                                                                                                                                                                                                                                                                                                                                                                                                                                                                                                                                                                                                                                                                                                                                                                                                                                                                                                                                                                                                                                                                                                 | Synlab Medilab<br>Synlab Suisse SA                                                                                                                        | Karolinska University Hospital<br>Clinical Bacteriology                                                                                                     | Annelie Bjerkner; Isak Sylvin; Jan Albert; Karolina Ininbergs; Lina Guerra Blomqvist; Lynda Eneh; Martin Ekman; Martina Wahlund; Robert Dyrdad; Sandra Broddesson; Tanja Normark; Tobias Allander; Valtteri Wirta; Zhibing Yun<br>Adrian Egli; Alfredo Mari; Fanny Wegner; Hans Hirsch; Helena MB Seth-Smith; Julia Bielicki; Karoline Leuzinger; Manuel Battegay; Tim Roloff                                                                                                                                                                                                                                                                                                                                                                                                                                                                                                                                                                                                                                                                                                                   |
| EPI_ISL_3638115, EPI_ISL_6229292                                                                                                                                                                                                                                                                                                                                                                                                                                                                                                                                                                                                                                                                                                                                                                                                                                                                                                                                                                                                                                                                                                                                                                                                                                                                                                                                                                                                                                                                                                                                                                                                                                                                                                 | Szpital Specjalistyczny im. H. Klimontowicza Medyczne Laboratorium Mikrobiologiczne                                                                       | Wojewódzka Stacja Sanitarno-Epidemiologiczna w Katowicach                                                                                                   | Beata Rozwadowska                                                                                                                                                                                                                                                                                                                                                                                                                                                                                                                                                                                                                                                                                                                                                                                                                                                                                                                                                                                                                                                                               |
| EPI_ISL_694321, EPI_ISL_6402209, EPI_ISL_7658928, EPI_ISL_7660673, EPI_ISL_7745574                                                                                                                                                                                                                                                                                                                                                                                                                                                                                                                                                                                                                                                                                                                                                                                                                                                                                                                                                                                                                                                                                                                                                                                                                                                                                                                                                                                                                                                                                                                                                                                                                                               | TGen North                                                                                                                                                | TGen North                                                                                                                                                  | *Jolene Bowers; Ashlyn Pfeiffer; Brett Van Tassel; Chris French; Darrin Lemmer; Dave Engelthaler; Dave Engelthaler*; Hayley Yaglom; Heather Centner; Jolene Bowers; Megan Folkerts; The Arizona COVID Genomics Union (ACGU)                                                                                                                                                                                                                                                                                                                                                                                                                                                                                                                                                                                                                                                                                                                                                                                                                                                                     |
| EPI_ISL_6491772, EPI_ISL_7709417                                                                                                                                                                                                                                                                                                                                                                                                                                                                                                                                                                                                                                                                                                                                                                                                                                                                                                                                                                                                                                                                                                                                                                                                                                                                                                                                                                                                                                                                                                                                                                                                                                                                                                 | TN DOH Lab Services                                                                                                                                       | TN DOH Lab Services                                                                                                                                         | Brian Selinsky; Karen Beasley-Maynard                                                                                                                                                                                                                                                                                                                                                                                                                                                                                                                                                                                                                                                                                                                                                                                                                                                                                                                                                                                                                                                           |
| EPI_ISL_903757                                                                                                                                                                                                                                                                                                                                                                                                                                                                                                                                                                                                                                                                                                                                                                                                                                                                                                                                                                                                                                                                                                                                                                                                                                                                                                                                                                                                                                                                                                                                                                                                                                                                                                                   | TN Division of Laboratory Services                                                                                                                        | Genomics and Discovery, Respiratory Viruses Branch, Division of Viral Diseases, Centers for Disease Control and Prevention                                  | Anna Montmayeur; Anna Uehara; Ben L. Rambo-Martin; Clinton R. Paden; Dhvani Batra; Haibin Wang; Jasmine Padilla; Jing Zhang; Justin Lee; Krista Queen; Lori Rowe; Mark Burroughs; Mili Sheth; Peter W. Cook; Rachel Marine; Sarah Nobles; Suxiang Tong; Yan Li; Ying Tao                                                                                                                                                                                                                                                                                                                                                                                                                                                                                                                                                                                                                                                                                                                                                                                                                        |
| EPI_ISL_5441970, EPI_ISL_5443125, EPI_ISL_6252521, EPI_ISL_6253076, EPI_ISL_8246701, EPI_ISL_8565749, EPI_ISL_9427689, EPI_ISL_9531963, EPI_ISL_9531971                                                                                                                                                                                                                                                                                                                                                                                                                                                                                                                                                                                                                                                                                                                                                                                                                                                                                                                                                                                                                                                                                                                                                                                                                                                                                                                                                                                                                                                                                                                                                                          | see above                                                                                                                                                 | TPMG Regional Laboratory                                                                                                                                    | CDPH COVIDNet and UCSC Genomics Institute; CDPH-COVIDNet and UCLA Technology Center for Genomics & Bioinformatics; CDPH-COVIDNet and UCSD EXCITE lab; CDPH-COVIDNet and UCSF Center for Advanced Technology; Emily Smith on behalf of CDPH-COVIDNet and UCSD EXCITE lab; Emily Smith on behalf of CDPH-COVIDNet and UCSF Center for Advanced Technology                                                                                                                                                                                                                                                                                                                                                                                                                                                                                                                                                                                                                                                                                                                                         |
| EPI_ISL_5196492                                                                                                                                                                                                                                                                                                                                                                                                                                                                                                                                                                                                                                                                                                                                                                                                                                                                                                                                                                                                                                                                                                                                                                                                                                                                                                                                                                                                                                                                                                                                                                                                                                                                                                                  | TSHEPONG LABORATORY                                                                                                                                       | National Institute for Communicable Diseases of the National Health Laboratory Service                                                                      | Amoako DG; Bhiman JN; Everatt J; Ismail A; Mahlangu B; Mnguni A; Mohale T; Ntuli N; Scheepers C                                                                                                                                                                                                                                                                                                                                                                                                                                                                                                                                                                                                                                                                                                                                                                                                                                                                                                                                                                                                 |
| EPI_ISL_4507519, EPI_ISL_751571                                                                                                                                                                                                                                                                                                                                                                                                                                                                                                                                                                                                                                                                                                                                                                                                                                                                                                                                                                                                                                                                                                                                                                                                                                                                                                                                                                                                                                                                                                                                                                                                                                                                                                  | TSU - 3100 CLEBURNE ST.<br>TX DSHS, Lab Services Section MC 1947                                                                                          | Houston Health Dept.<br>Genomics and Discovery, Respiratory Viruses Branch, Division of Viral Diseases, Centers for Disease Control and Prevention          | Adolfo Lara; Pamela Brown; Ryker Penn; Yanlai Lai<br>Anna Montmayeur; Anna Uehara; Clinton R. Paden; Haibin Wang; Jing Zhang; Justin Lee; Krista Queen; Mili Sheth; Peter W. Cook; Rachel Marine; Suxiang Tong; Yan Li; Ying Tao                                                                                                                                                                                                                                                                                                                                                                                                                                                                                                                                                                                                                                                                                                                                                                                                                                                                |
| EPI_ISL_1252589, EPI_ISL_1252642, EPI_ISL_1337678, EPI_ISL_1366082, EPI_ISL_1478994, EPI_ISL_1479001, EPI_ISL_3267896, EPI_ISL_3455643                                                                                                                                                                                                                                                                                                                                                                                                                                                                                                                                                                                                                                                                                                                                                                                                                                                                                                                                                                                                                                                                                                                                                                                                                                                                                                                                                                                                                                                                                                                                                                                           | see above                                                                                                                                                 | TXDSHS                                                                                                                                                      | Anita Pokharel; Bonnie Oh; Chun Wang; Grace Kubin; Jenny Zhang; Karen Bobier; Lorraine Rodriguez; Lorraine Rodriguez; Maliha Rahman; Mayela Pedruza; Myong Koag; Rachel Lee; Rashmi Tuladhar                                                                                                                                                                                                                                                                                                                                                                                                                                                                                                                                                                                                                                                                                                                                                                                                                                                                                                    |
| EPI_ISL_2507812                                                                                                                                                                                                                                                                                                                                                                                                                                                                                                                                                                                                                                                                                                                                                                                                                                                                                                                                                                                                                                                                                                                                                                                                                                                                                                                                                                                                                                                                                                                                                                                                                                                                                                                  | TYKS, Kliininen mikrobiologia                                                                                                                             | Expert Microbiology, National Institute for Health and Welfare                                                                                              | Carita Savolainen-Kopra; Erika Lindh; Haider al-Hello; Jani Halkilahti; Kirsi Liitsola; Niina Ikonen; Olli Vapalahti; Pekka Ellonen; Phuoc Truong; Päivi Laurila; Ravi Kant; Sari Hannula; Soile Blomqvist; Teemu Smura                                                                                                                                                                                                                                                                                                                                                                                                                                                                                                                                                                                                                                                                                                                                                                                                                                                                         |

|                                                                                                                                                                                                                                                                                                 |                                                                                                                                                                                     |                                                                                                                        |                                                                                                                                                                                                                                                                                                                                                                                                                                                                                                                                                                                                                                                                                                                                                                                                                                                                                                                                                                     |
|-------------------------------------------------------------------------------------------------------------------------------------------------------------------------------------------------------------------------------------------------------------------------------------------------|-------------------------------------------------------------------------------------------------------------------------------------------------------------------------------------|------------------------------------------------------------------------------------------------------------------------|---------------------------------------------------------------------------------------------------------------------------------------------------------------------------------------------------------------------------------------------------------------------------------------------------------------------------------------------------------------------------------------------------------------------------------------------------------------------------------------------------------------------------------------------------------------------------------------------------------------------------------------------------------------------------------------------------------------------------------------------------------------------------------------------------------------------------------------------------------------------------------------------------------------------------------------------------------------------|
| EPI_ISL_1379581,<br>EPI_ISL_1313424                                                                                                                                                                                                                                                             | Tampa General Hospital Esoteric Lab                                                                                                                                                 | Tampa General Hospital Esoteric Research & Development Lab                                                             | Amorce Lima; Deanna Becker; Dominic Uy; Elaine Vendrone; Grant Vestal; Jon Faughn; Jorge Mecias-Frias; Marci O'Driscoll; Suzane Silbert; Vicki Healer                                                                                                                                                                                                                                                                                                                                                                                                                                                                                                                                                                                                                                                                                                                                                                                                               |
| EPI_ISL_8712474                                                                                                                                                                                                                                                                                 | Telemark Hospital Trust - Skien, Dept. of Medical Microbiology                                                                                                                      | Norwegian Institute of Public Health, Department of Virology                                                           | Atiya R Ali; Debech Nadia; Engebretsen Serina Beate; Garcia Llorente Ignacio; Hilde Elshaug; Hilde Vollan; Jon Bråte; Kamilla Heddeland Instedfor; Karoline Bragstad; Kathrine Stene-Johansen; Line Victoria Moen; Marie Paulsen Madsen; Olav Hungnes; Pedersen Benedikte Nevjen; Rasmus Riis Kopperud                                                                                                                                                                                                                                                                                                                                                                                                                                                                                                                                                                                                                                                              |
| EPI_ISL_5565889                                                                                                                                                                                                                                                                                 | Teresita Jalandoni Provincial Hospital                                                                                                                                              | Philippine Genome Center                                                                                               | Alethea R. de Guzman; Alyssa Joyce E. Telles; Anna Ong-Lim; Arianne A. Zamora; Benedict A. Maralit; Carlo M. Lapid; Celia Carlos; Cynthia P. Saloma; Devon Ray Pacial; Diomedes A. Cariño; Edsel Maurice Salvana; El King D. Morado; Elcid Aaron R. Pangilinan; Eva Maria Cutiongo-de la Paz; Francis A. Tablizo; Henrietta Marie Rodriguez; Jaime C. Montoya; Jan Michael C. Yap; Jarvin E. Nipales; Jo-Hannah S. Llamas; John Michael Egana; John Q. Wong; Joshua Gregor A. Dizon; Joshua Jose Endozo; Juan Antonio R. Magalang; Karol Sophia Agape R. Padilla; Kris P. Punayan; Kristina Patriz Dela Cruz; Lindsay Clare D.L. Carandang; Marc Edsel C. Ayes; Maria Rosario Singh-Vergeire; Maria Sofia L. Yangzon; Marielle M. Gamboa; Marissa Alejandra; Nifa Francesca Bustamante; Razel Nikka M. Hao; Renato Jacinto Q. Mantaring; Rianna Patricia S. Cruz; Sheila Mae M. Araiza; Yvonne Valerie Austria; Zipporah Mariebelle R. Enriquez; Zyrrel V. Mollejon |
| EPI_ISL_8901542                                                                                                                                                                                                                                                                                 | Texas A&M Global Health Research Complex (TAMGHRC)                                                                                                                                  | TAMGHRC                                                                                                                | Andrew Hillhouse; Benjamin W. Neuman; Kurt A. Zuelke; Melissa M. Kahl-Mcdonagh; Sankar P. Chaki; Wesley Brashear                                                                                                                                                                                                                                                                                                                                                                                                                                                                                                                                                                                                                                                                                                                                                                                                                                                    |
| EPI_ISL_3149018                                                                                                                                                                                                                                                                                 | Texas Children's Hospital                                                                                                                                                           | Texas Children's Microbiome Center                                                                                     | Ila Singh; James Dunn; James Versalovic; Jennifer K. Spilner; Ruth Ann Luna                                                                                                                                                                                                                                                                                                                                                                                                                                                                                                                                                                                                                                                                                                                                                                                                                                                                                         |
| EPI_ISL_412978                                                                                                                                                                                                                                                                                  | The Central Hospital Of Wuhan                                                                                                                                                       | Hubei Provincial Center for Disease Control and Prevention                                                             | Bin Fang; Bo Yang; Bo Yu; Faxian Zhan; Guojun Ye; Jing Li; Junqiang Xu; Kun Cai; Linlin Liu; Xiang Li; Xiao Yu; Xixiang Huo; Yongzhong Jiang.                                                                                                                                                                                                                                                                                                                                                                                                                                                                                                                                                                                                                                                                                                                                                                                                                       |
| EPI_ISL_3539357                                                                                                                                                                                                                                                                                 | The Children's Hospital at Westmead                                                                                                                                                 | NSW Health Pathology - Institute of Clinical Pathology and Medical Research; Westmead Hospital; University of Sydney   | Amott A.; Draper J.; Gall M.; Martinez E.; Rockett R.; Sintchenko V.; on behalf of ICPMR                                                                                                                                                                                                                                                                                                                                                                                                                                                                                                                                                                                                                                                                                                                                                                                                                                                                            |
| EPI_ISL_1203836, EPI_ISL_1470601, EPI_ISL_2716218, EPI_ISL_3668527, EPI_ISL_4204625, EPI_ISL_8017579, EPI_ISL_8017586, EPI_ISL_8317689                                                                                                                                                          | see above                                                                                                                                                                           | The Jackson Laboratory                                                                                                 | Adams M; Bergeron D; Carrano E; Kelly K; Li L; Lloyd M; Long E; Long J; Maurya R; Omerza G; Renzette N; Sanderson B; Srivastava A; Wei C L                                                                                                                                                                                                                                                                                                                                                                                                                                                                                                                                                                                                                                                                                                                                                                                                                          |
| EPI_ISL_2188953,<br>EPI_ISL_2189049,<br>EPI_ISL_2189209                                                                                                                                                                                                                                         | The Lord's Grace Medical and Industrial Clinic                                                                                                                                      | Philippine Genome Center                                                                                               | Alethea R. de Guzman; Anna Ong-Lim; Arianne A. Zamora; Asia Louisa U. Chong; Benedict A. Maralit; Candice Francheska B. Tambaoan; Carlo M. Lapid; Celia Carlos; Devon Ray Pacial; Edsel Maurice Salvaña; El King D. Morado; Elcid Aaron R. Pangilinan; Eva Maria Cutiongo-de la Paz; Francis A. Tablizo; Irish Coleen A. Asin; Jaime C. Montoya; Jan Michael C. Yap; Jo-Hannah S. Llamas; John Q. Wong; Joshua Gregor A. Dizon; Juan Antonio R. Magalang; Karol Sophia Agape R. Padilla; Kenneth M. Kim; Kris P. Punayan; Marc Edsel C. Ayes; Maria Rosario Singh-Vergeire and Cynthia P. Saloma; Maria Sofia L. Yangzon; Marissa Alejandria; Razel Nikka M. Hao; Renato Jacinto Q. Mantaring; Rianna Patricia S. Cruz; Sheila Mae M. Araiza                                                                                                                                                                                                                        |
| EPI_ISL_2189068                                                                                                                                                                                                                                                                                 | The Medical City                                                                                                                                                                    | Philippine Genome Center                                                                                               | Alethea R. de Guzman; Anna Ong-Lim; Arianne A. Zamora; Asia Louisa U. Chong; Benedict A. Maralit; Candice Francheska B. Tambaoan; Carlo M. Lapid; Celia Carlos; Devon Ray Pacial; Edsel Maurice Salvaña; El King D. Morado; Elcid Aaron R. Pangilinan; Eva Maria Cutiongo-de la Paz; Francis A. Tablizo; Irish Coleen A. Asin; Jaime C. Montoya; Jan Michael C. Yap; Jo-Hannah S. Llamas; John Q. Wong; Joshua Gregor A. Dizon; Juan Antonio R. Magalang; Karol Sophia Agape R. Padilla; Kenneth M. Kim; Kris P. Punayan; Marc Edsel C. Ayes; Maria Rosario Singh-Vergeire and Cynthia P. Saloma; Maria Sofia L. Yangzon; Marissa Alejandria; Razel Nikka M. Hao; Renato Jacinto Q. Mantaring; Rianna Patricia S. Cruz; Sheila Mae M. Araiza                                                                                                                                                                                                                        |
| EPI_ISL_577635                                                                                                                                                                                                                                                                                  | The National Institute of Public Health                                                                                                                                             | State Veterinary Institute Prague                                                                                      | A; D; H; J; Jirincova; L; Nagy; Novakova; Trnka; Vecerova                                                                                                                                                                                                                                                                                                                                                                                                                                                                                                                                                                                                                                                                                                                                                                                                                                                                                                           |
| EPI_ISL_827212, EPI_ISL_1586045, EPI_ISL_1586197, EPI_ISL_3926924, EPI_ISL_3927590, EPI_ISL_3929164, EPI_ISL_3929893                                                                                                                                                                            | see above                                                                                                                                                                           | deCODE genetics                                                                                                        | Agnar Helgason; Alma Moller; Arna B Agustsdottir; Arnaldur Gylfason; Asgeir Sigurdsson; Aslaug Jonasdottir; Berglind Eiríksdóttir; Bjarni Thorbjörnsson; Brynjar O Jensen; Daniel F Guðbjartsson; Droplaug N Magnúsdóttir; Elisabet E Gardarsdóttir; Emil A Thorarensen; Gardar Sveinbjörnsson; Gisli Masson; Gudmundur Georgsson; Gudmundur L Norddahl; Gudrun Sigmundsdóttir; Hakon Jonsson; Hannes Eggertsson; Hilma Holm; Ingileif Jónsdóttir; Jóna Saemundsdóttir; Kamilla S Josefsson; Karl G Kristinnsson; Kjartan R Gudmundsson; Kristin E Sveinsdóttir; Kristján E Hjorleifsson; Louise le Roux; Maney Sveinsdóttir; Olafía S Gretarsdóttir; Olafur T Magnússon; Pall Melsted; Patrick Sulem; Run Fridriksdóttir; Solvi Rognvaldsson; Thora R Gunnarsdóttir; Thordur Kristjánsson; Thorlufur Gudnason; Unnur Thorsteinsdóttir                                                                                                                              |
| EPI_ISL_1911021, EPI_ISL_1911048, EPI_ISL_1911059, EPI_ISL_1911089, EPI_ISL_2006931, EPI_ISL_2006976, EPI_ISL_2100737, EPI_ISL_2100762, EPI_ISL_2100933, EPI_ISL_2100934, EPI_ISL_2153756, EPI_ISL_2312816, EPI_ISL_2312848, EPI_ISL_2382796, EPI_ISL_2399756, EPI_ISL_2758860, EPI_ISL_6949963 | see above                                                                                                                                                                           | The Ohio State University Applied Microbiology Services Laboratory                                                     | Seth A. Faith PhD                                                                                                                                                                                                                                                                                                                                                                                                                                                                                                                                                                                                                                                                                                                                                                                                                                                                                                                                                   |
| EPI_ISL_2125533                                                                                                                                                                                                                                                                                 | The Roslin Institute and R(D)SVS, University of Edinburgh / Virology Department, Royal Infirmary of Edinburgh, NHS Lothian / School of Biological Sciences, University of Edinburgh | COVID-19 Genomics UK (COG-UK) Consortium                                                                               | C; Colquhoun R; Cotton S; Dewar R; Gallagher A; Hill V; Jackson B; Maloney D; McCrone JT; McHugh M; Newman; O'Toole Á; Rambaut A; Rooke S; Scher E; Tait-Burkhard C; Templeton K; Warr A; Yu X                                                                                                                                                                                                                                                                                                                                                                                                                                                                                                                                                                                                                                                                                                                                                                      |
| EPI_ISL_9397331                                                                                                                                                                                                                                                                                 | Tokyo Metropolitan Institute of Public Health                                                                                                                                       | Tokyo Metropolitan Institute of Public Health                                                                          | Akane Negishi; Arisa Amano; Hirofumi Miyake; Jun Suzuki; Kenji Sadamasa; Kenshirou Kuroki; Mami Nagashima; Masaki Hayashi; Maya Isogai; Takako Yamazaki; Takushi Fujiwara                                                                                                                                                                                                                                                                                                                                                                                                                                                                                                                                                                                                                                                                                                                                                                                           |
| EPI_ISL_852904,<br>EPI_ISL_853192,<br>EPI_ISL_853601                                                                                                                                                                                                                                            | Toronto Invasive Bacterial Diseases Network                                                                                                                                         | Ontario Institute for Cancer Research                                                                                  | Allison McGeer; Angel Li; Bernard Lam; Ilina Lungu; Jared T. Simpson; Kuganya Nirmalarajah; Lawrence E. Heisler; Lubaina Kothari; Michael Laszloffy; Patryk Aftanas; Paul Krzyzanowski; Richard de Borja; Samira Mubareka                                                                                                                                                                                                                                                                                                                                                                                                                                                                                                                                                                                                                                                                                                                                           |
| EPI_ISL_1430567                                                                                                                                                                                                                                                                                 | Toyama Institute of Health                                                                                                                                                          | Pathogen Genomics Center, National Institute of Infectious Diseases                                                    | Kentaro Itokawa; Makoto Kuroda; Masanori Hashino; Rina Tanaka; Tsuyoshi Sekizuka                                                                                                                                                                                                                                                                                                                                                                                                                                                                                                                                                                                                                                                                                                                                                                                                                                                                                    |
| EPI_ISL_8486770                                                                                                                                                                                                                                                                                 | TriCore Reference Laboratories                                                                                                                                                      | Center for Global Health, University of New Mexico Health Sciences Center                                              | Cecilia Thompson; Darrell Dinwiddie; Daryl Domman; Jesse Young; Karissa Culbreath; Kendra Pesko; Kurt Schwalm; Valerie Morley                                                                                                                                                                                                                                                                                                                                                                                                                                                                                                                                                                                                                                                                                                                                                                                                                                       |
| EPI_ISL_3648057                                                                                                                                                                                                                                                                                 | TriCore Reference Laboratory Inc.                                                                                                                                                   | New Mexico Department of Health Scientific Laboratory                                                                  | Anastacia Griego-Fisher; D'eldra Malone; Ellie Johnson; Jennifer Benoit                                                                                                                                                                                                                                                                                                                                                                                                                                                                                                                                                                                                                                                                                                                                                                                                                                                                                             |
| EPI_ISL_3832683,<br>EPI_ISL_4967481,<br>EPI_ISL_5416069,<br>EPI_ISL_5880631                                                                                                                                                                                                                     | Tripler Army Medical Center, Microbiology Department                                                                                                                                | Department of Clinical Investigation                                                                                   | Catherine Uyehara; Jonathan D'Ambrozio; Kendra Carter; Rachael Downham                                                                                                                                                                                                                                                                                                                                                                                                                                                                                                                                                                                                                                                                                                                                                                                                                                                                                              |
| EPI_ISL_7235602,<br>EPI_ISL_7235606                                                                                                                                                                                                                                                             | Tulane University School of Medicine                                                                                                                                                | Tulane University School of Medicine                                                                                   | Di Tian                                                                                                                                                                                                                                                                                                                                                                                                                                                                                                                                                                                                                                                                                                                                                                                                                                                                                                                                                             |
| EPI_ISL_3449455                                                                                                                                                                                                                                                                                 | Tulare County Public Health Laboratory                                                                                                                                              | Tulare County Public Health Laboratory                                                                                 | Denise L Lopez; Joshua Koolstra                                                                                                                                                                                                                                                                                                                                                                                                                                                                                                                                                                                                                                                                                                                                                                                                                                                                                                                                     |
| EPI_ISL_3214651,<br>EPI_ISL_3215288,<br>EPI_ISL_3266441                                                                                                                                                                                                                                         | U.O. Microbiologia Laboratorio Unico Centro Servizi - AUSL della Romagna                                                                                                            | U.O. Microbiologia, Laboratorio Unico Centro Servizi - AUSL della Romagna                                              | Giorgio Dirani                                                                                                                                                                                                                                                                                                                                                                                                                                                                                                                                                                                                                                                                                                                                                                                                                                                                                                                                                      |
| EPI_ISL_1791315                                                                                                                                                                                                                                                                                 | U.O. Microbiologia, Laboratorio Unico Centro Servizi - AUSL della Romagna                                                                                                           | U.O. Microbiologia, Laboratorio Unico Centro Servizi - AUSL della Romagna                                              | Giorgio Dirani; Silvia Zannoli; Vittorio Sambri                                                                                                                                                                                                                                                                                                                                                                                                                                                                                                                                                                                                                                                                                                                                                                                                                                                                                                                     |
| EPI_ISL_2340053                                                                                                                                                                                                                                                                                 | UAB "Baltic Medics"                                                                                                                                                                 | Institute of Biotechnology, Life Sciences Center, Vilnius University                                                   | Albertas Timinskas; Alma Gedvilaitė; Danguole Ziogiene; Emilija Vasiliunaite; Milda Norkiene                                                                                                                                                                                                                                                                                                                                                                                                                                                                                                                                                                                                                                                                                                                                                                                                                                                                        |
| EPI_ISL_2334902,<br>EPI_ISL_3340935                                                                                                                                                                                                                                                             | UAB "Rezus.lt"                                                                                                                                                                      | National Public Health Surveillance Laboratory                                                                         | Ana Steponkiene; Danas Baksa; Jelena Razmuk; Lukas Vasionis; Lukas Zemaitis; Migle Gabrielaite; Svajune Muralyte                                                                                                                                                                                                                                                                                                                                                                                                                                                                                                                                                                                                                                                                                                                                                                                                                                                    |
| EPI_ISL_8675382<br>EPI_ISL_5390738                                                                                                                                                                                                                                                              | UAB "SK IMPEKS MEDICINOS DIAGNOSTIKOS CENTRAS"<br>UAB Diagnostikos laboratorija                                                                                                     | National Public Health Surveillance Laboratory<br>Institute of Biotechnology, Life Sciences Center, Vilnius University | Ana Steponkiene; Danas Baksa; Jelena Razmuk; Lukas Vasionis; Lukas Zemaitis; Migle Gabrielaite; Svajune Muralyte<br>Albertas Timinskas; Alma Gedvilaitė; Danguole Ziogiene; Emilija Vasiliunaite; Milda Norkiene                                                                                                                                                                                                                                                                                                                                                                                                                                                                                                                                                                                                                                                                                                                                                    |
| EPI_ISL_2509459,<br>EPI_ISL_5847007,<br>EPI_ISL_8675466,<br>EPI_ISL_8675568                                                                                                                                                                                                                     | UAB Diagnostikos laboratorija                                                                                                                                                       | National Public Health Surveillance Laboratory                                                                         | Ana Steponkiene; Danas Baksa; Jelena Razmuk; Lukas Vasionis; Lukas Zemaitis; Migle Gabrielaite; Svajune Muralyte                                                                                                                                                                                                                                                                                                                                                                                                                                                                                                                                                                                                                                                                                                                                                                                                                                                    |
| EPI_ISL_8348657,<br>EPI_ISL_8675780                                                                                                                                                                                                                                                             | UAB Medicina practica laboratorija                                                                                                                                                  | National Public Health Surveillance Laboratory                                                                         | Ana Steponkiene; Danas Baksa; Jelena Razmuk; Lukas Vasionis; Lukas Zemaitis; Migle Gabrielaite; Svajune Muralyte                                                                                                                                                                                                                                                                                                                                                                                                                                                                                                                                                                                                                                                                                                                                                                                                                                                    |
| EPI_ISL_5664907                                                                                                                                                                                                                                                                                 | UBS CAROLINA MARIA DE JESUS                                                                                                                                                         | Instituto Butantan                                                                                                     | Antonio Jorge Martins; Claudia Renata dos Santos Barros; David Schlesinger; Debora Botequijo Moretti; Dimas Tadeu Covas; Elaine Cristina Marquese; Elaine Vieira Santos; Evandra Strazza Rodrigues; Heidge Fukumasu; Jayme Augusto de Souza-Neto; José Salvatore Leister Patané; Luiz Alcantara; Luiz Lehmann Coutinho; Maria Carolina Elias; Mauricio Lacerda Nogueira; Rafael dos Santos Bezerra; Raul Machado Neto; Rejane Maria Tommasini Grotto; Ricardo Haddad; Sandra Coccuzzo Sampaio Vessoni; Simone Kashima; Svetoslav Nanev Slavov; Vincent Louis Viala                                                                                                                                                                                                                                                                                                                                                                                                  |
| EPI_ISL_5978145                                                                                                                                                                                                                                                                                 | UC Davis Genome Center                                                                                                                                                              | UC Davis Genome Center                                                                                                 | UC Davis                                                                                                                                                                                                                                                                                                                                                                                                                                                                                                                                                                                                                                                                                                                                                                                                                                                                                                                                                            |
| EPI_ISL_4867403,<br>EPI_ISL_4869009                                                                                                                                                                                                                                                             | UC Davis Genome Center and Healthy Davis Together                                                                                                                                   | UC Davis Genome Center                                                                                                 | UC Davis                                                                                                                                                                                                                                                                                                                                                                                                                                                                                                                                                                                                                                                                                                                                                                                                                                                                                                                                                            |
| EPI_ISL_849930                                                                                                                                                                                                                                                                                  | UC Davis- Department of Pathology and Laboratory Medicine                                                                                                                           | Chan-Zuckerberg Biohub                                                                                                 | CZB Biohub Consortium                                                                                                                                                                                                                                                                                                                                                                                                                                                                                                                                                                                                                                                                                                                                                                                                                                                                                                                                               |
| EPI_ISL_3347291,<br>EPI_ISL_5195918                                                                                                                                                                                                                                                             | UCC (Universidad Central del Caribe)                                                                                                                                                | Grubaguh Lab - Yale School of Public Health                                                                            | Anderson Brito; Andrea Firpo; Annie Watkins; Chaney Kalinich; Chantal Vogels; David Rivera Aponte; Ernesto Vazquez; Fabiola Cruz-Lopez; Fabiola Fontanet; Isabel Ott; Jessica Rothman; Joseph Fauver; Karolane Gonzalez; Kendal Billig; Mallery Breban; Mary Petrone; Natalie Machargo; Nathan Grubaguh; Patricia Serrano; Tania Mitwalli; Tara Alpert; Tobias Koch; Vianca Aponte                                                                                                                                                                                                                                                                                                                                                                                                                                                                                                                                                                                  |
| EPI_ISL_962512,<br>EPI_ISL_7962286                                                                                                                                                                                                                                                              | UCLA Clinical Micro Lab                                                                                                                                                             | Los Angeles County Public Health Laboratories                                                                          | P. Hemarajata et al.                                                                                                                                                                                                                                                                                                                                                                                                                                                                                                                                                                                                                                                                                                                                                                                                                                                                                                                                                |
| EPI_ISL_3923158                                                                                                                                                                                                                                                                                 | UCSC Genomics Institute                                                                                                                                                             | UCSC Genomics Institute                                                                                                | A. Marm Kilpatrick; Angie Hinrichs; Beth Shapiro; Bryan Thornlow; Ciara Wanket; David Haussler; Eric Beraut; Hugh Olsen; Ikenna Anigbogus; Isabel Bjork; Jakob McBroome; Jeremy Sanford; Joshua Kapp; Mark Akeson; Maximilian Haeussler; Michael Stone; Miten Jain; Molly Cassatt-Johnstone; Namrita Dhillon; Russell Corbett-Detig; Terren Chang; Yatish Turakhia                                                                                                                                                                                                                                                                                                                                                                                                                                                                                                                                                                                                  |
| EPI_ISL_511630                                                                                                                                                                                                                                                                                  | ULS Guarda                                                                                                                                                                          | Instituto Nacional de Saude (INSA)                                                                                     | Borges et al                                                                                                                                                                                                                                                                                                                                                                                                                                                                                                                                                                                                                                                                                                                                                                                                                                                                                                                                                        |
| EPI_ISL_941596                                                                                                                                                                                                                                                                                  | ULS Litoral Alentejano                                                                                                                                                              | Instituto Nacional de Saude (INSA)                                                                                     | Borges et al                                                                                                                                                                                                                                                                                                                                                                                                                                                                                                                                                                                                                                                                                                                                                                                                                                                                                                                                                        |
| EPI_ISL_1260923                                                                                                                                                                                                                                                                                 | ULSS 03 Venezia                                                                                                                                                                     | Istituto Zooprofilattico Sperimentale delle Venezie                                                                    | Adelaide Milani; Alessia Schivo; Alice Fusaro; Ambra Pastori; Annalisa Salviato; Antonia Ricci; Calogero Terregino; Edoardo Giussani; Erika Giorgia Quaranta; Isabella Monne; Luca Tassoni                                                                                                                                                                                                                                                                                                                                                                                                                                                                                                                                                                                                                                                                                                                                                                          |
| EPI_ISL_1524676                                                                                                                                                                                                                                                                                 | ULSS 3 Venezia                                                                                                                                                                      | Istituto Zooprofilattico Sperimentale delle Venezie                                                                    | Adelaide Milani; Alessia Schivo; Alice Fusaro; Ambra Pastori; Annalisa Salviato; Antonia Ricci; Calogero Terregino; Edoardo Giussani; Elisa Palumbo; Erika Giorgia Quaranta; Isabella Monne; Luca Tassoni                                                                                                                                                                                                                                                                                                                                                                                                                                                                                                                                                                                                                                                                                                                                                           |
| EPI_ISL_2448618                                                                                                                                                                                                                                                                                 | ULSS 8 Berica                                                                                                                                                                       | Istituto Zooprofilattico Sperimentale delle Venezie                                                                    | Adelaide Milani; Alessia Schivo; Alice Fusaro; Ambra Pastori; Annalisa Salviato; Antonia Ricci; Calogero Terregino; Edoardo Giussani; Elisa Palumbo; Erika Giorgia Quaranta; Isabella Monne; Luca Tassoni                                                                                                                                                                                                                                                                                                                                                                                                                                                                                                                                                                                                                                                                                                                                                           |
| EPI_ISL_2543699                                                                                                                                                                                                                                                                                 | UM im. Karola Marcinkowskiego w Poznaniu Laboratorium UCA_Covid-19                                                                                                                  | 1. National Institute of Public Health - National Institute of Hygiene, Warsaw, Poland 2. Biobank                      | Dominik Strapagiel; Izabela Drózdź; Jakub Lach; Katarzyna Zacharczuk; Klaudyna Królikowska; Maciej Borowiec; Magdalena Nowakowska; Magdalena Traczyk-Borszyńska; Marcin Słomka; Marta Sobalska-Kwapis; Małgorzata Sadkowska-Todys; Tomasz Poszaj; Tomasz Wolkowicz                                                                                                                                                                                                                                                                                                                                                                                                                                                                                                                                                                                                                                                                                                  |

|                                                                                                                                                                                                                                                                                                                                                                                                                                                                                                                                               |                                                                                                                              |                                                                                                                      |                                                                                                                                                                                                                                                                                                                                                                                                                                                                                                                                                                                                                                                                                                                                                                                                                                                                                                                                                                                                                                                                                                                                                                                                                                                                                                                                                                                                                                                                                                                                                                                                                                                                                                                                                  |
|-----------------------------------------------------------------------------------------------------------------------------------------------------------------------------------------------------------------------------------------------------------------------------------------------------------------------------------------------------------------------------------------------------------------------------------------------------------------------------------------------------------------------------------------------|------------------------------------------------------------------------------------------------------------------------------|----------------------------------------------------------------------------------------------------------------------|--------------------------------------------------------------------------------------------------------------------------------------------------------------------------------------------------------------------------------------------------------------------------------------------------------------------------------------------------------------------------------------------------------------------------------------------------------------------------------------------------------------------------------------------------------------------------------------------------------------------------------------------------------------------------------------------------------------------------------------------------------------------------------------------------------------------------------------------------------------------------------------------------------------------------------------------------------------------------------------------------------------------------------------------------------------------------------------------------------------------------------------------------------------------------------------------------------------------------------------------------------------------------------------------------------------------------------------------------------------------------------------------------------------------------------------------------------------------------------------------------------------------------------------------------------------------------------------------------------------------------------------------------------------------------------------------------------------------------------------------------|
|                                                                                                                                                                                                                                                                                                                                                                                                                                                                                                                                               | Lab, University of Lodz 3. Laboratory of Respiratory Viruses, Teaching and Clinical Center of the Medical University of Lodz |                                                                                                                      | Alexander Friedrich; Coretta Van Leer-Buter; Erley Lizarazo-Forero; Hubert Niesters; Lilli Gard; Marjolien Knoester; Monika Fliss; Sigrid Rosema; Xuewei Zhou                                                                                                                                                                                                                                                                                                                                                                                                                                                                                                                                                                                                                                                                                                                                                                                                                                                                                                                                                                                                                                                                                                                                                                                                                                                                                                                                                                                                                                                                                                                                                                                    |
| EPI_ISL_2099528, EPI_ISL_5511852                                                                                                                                                                                                                                                                                                                                                                                                                                                                                                              | UMC Groningen, Clinical Virology, Department of Medical Microbiology and Infection Prevention                                | UMC Groningen, Clinical Virology, Department of Medical Microbiology and Infection Prevention                        |                                                                                                                                                                                                                                                                                                                                                                                                                                                                                                                                                                                                                                                                                                                                                                                                                                                                                                                                                                                                                                                                                                                                                                                                                                                                                                                                                                                                                                                                                                                                                                                                                                                                                                                                                  |
| EPI_ISL_2886095                                                                                                                                                                                                                                                                                                                                                                                                                                                                                                                               | UMC Utrecht                                                                                                                  | UMC Utrecht                                                                                                          | Annermine Wensing; Anniek Tanja; Rob Schuurman                                                                                                                                                                                                                                                                                                                                                                                                                                                                                                                                                                                                                                                                                                                                                                                                                                                                                                                                                                                                                                                                                                                                                                                                                                                                                                                                                                                                                                                                                                                                                                                                                                                                                                   |
| EPI_ISL_9221655, EPI_ISL_9274186, EPI_ISL_9352897                                                                                                                                                                                                                                                                                                                                                                                                                                                                                             | UMGC                                                                                                                         | UMGC                                                                                                                 | Brandon Cooper; David Xing; Gregg Thomas; Jeffrey Good; Nathanael Herrera; Tim Thurman; William Conner                                                                                                                                                                                                                                                                                                                                                                                                                                                                                                                                                                                                                                                                                                                                                                                                                                                                                                                                                                                                                                                                                                                                                                                                                                                                                                                                                                                                                                                                                                                                                                                                                                           |
| EPI_ISL_3409678, EPI_ISL_3410236, EPI_ISL_3410702, EPI_ISL_4890408, EPI_ISL_4890431, EPI_ISL_7170120, EPI_ISL_7170282, EPI_ISL_7170369, EPI_ISL_7950982, EPI_ISL_8150848                                                                                                                                                                                                                                                                                                                                                                      | UMass Memorial Medical Center                                                                                                | Center for Microbiome Research                                                                                       | Doyle V. Ward; Karl J. Simon; Richard T. Ellison III; Timothy F. Kowalik                                                                                                                                                                                                                                                                                                                                                                                                                                                                                                                                                                                                                                                                                                                                                                                                                                                                                                                                                                                                                                                                                                                                                                                                                                                                                                                                                                                                                                                                                                                                                                                                                                                                         |
| see above                                                                                                                                                                                                                                                                                                                                                                                                                                                                                                                                     | UNC Charlotte COVID-19 Testing Lab                                                                                           | UNC Charlotte Environmental Monitoring Laboratory                                                                    | Angelica Martins; Cynthia Gibas; Jannatul Ferdous; Jessica Schlueter; Juan Bolanos; Kevin Lambirth; Sam Kunkleman; Torri Weathers; Visva Barua                                                                                                                                                                                                                                                                                                                                                                                                                                                                                                                                                                                                                                                                                                                                                                                                                                                                                                                                                                                                                                                                                                                                                                                                                                                                                                                                                                                                                                                                                                                                                                                                   |
| EPI_ISL_1938118, EPI_ISL_1938267, EPI_ISL_4630105                                                                                                                                                                                                                                                                                                                                                                                                                                                                                             | UNC-CH COVID Surveillance Lab                                                                                                | Jeremy Wang                                                                                                          | Alexander Rubinsteyn; Amir Barzin; Amy James Loftis; Corbin Jones; Jeremy Wang; Melissa Miller; Susan Fiscus                                                                                                                                                                                                                                                                                                                                                                                                                                                                                                                                                                                                                                                                                                                                                                                                                                                                                                                                                                                                                                                                                                                                                                                                                                                                                                                                                                                                                                                                                                                                                                                                                                     |
| EPI_ISL_1854871                                                                                                                                                                                                                                                                                                                                                                                                                                                                                                                               | UNIDADE BASICA DE SAUDE MUNICIPAL                                                                                            | Analytical Competence Molecular Epidemiology Lab/ACME, Oswaldo Cruz Foundation, Ceara (FIOCRUZ CE)                   | Cleber Furtado Aksenen; Fabio Miyajima; Fernando Braga Stehling; Francisco Eder de Moura Lopes; Jamille Maria Mendes Bezerra; Joaquim Cesar do Nascimento Sousa Junior; Pedro Miguel Carneiro Jeronimo; Suzana Porto Almeida e Lucas Delerino on behalf of COVID-19 FIOCRUZ Scientific Network; Thais Ferreira de Oliveira; Thais de Oliveira Costa; Ticiane Cavalcante de Souza; Veridiana Pessoa Miyajima                                                                                                                                                                                                                                                                                                                                                                                                                                                                                                                                                                                                                                                                                                                                                                                                                                                                                                                                                                                                                                                                                                                                                                                                                                                                                                                                      |
| EPI_ISL_3912302                                                                                                                                                                                                                                                                                                                                                                                                                                                                                                                               | UNIDADE DE VIGILANCIA EPIDEMIOLOGICA                                                                                         | Instituto Butantan                                                                                                   | Antonio Jorge Martins; Claudia Renata dos Santos Barros; David Schlesinger; Debora Botequim Moretti; Dimas Tadeu Covas; Elaine Cristina Marquize; Elaine Vieira Santos; Evandra Strazza Rodrigues; Heidge Fukumasu; Jayme Augusto de Souza-Neto; José Salvatore Leister Patané; Luiz Alcantara; Luiz Lehmann Coutinho; Maria Carolina Elias; Maurício Lacerda Nogueira; Rafael dos Santos Bezerra; Raul Machado Neto; Rejane Maria Tommasini Grotto; Ricardo Haddad; Sandra Coccuzzo Sampaio Vessoni; Simone Kashima; Svetoslav Nanev Slavov; Vincent Louis Viala                                                                                                                                                                                                                                                                                                                                                                                                                                                                                                                                                                                                                                                                                                                                                                                                                                                                                                                                                                                                                                                                                                                                                                                |
| EPI_ISL_4747137                                                                                                                                                                                                                                                                                                                                                                                                                                                                                                                               | UNIDADE RESPIRATORIA NOVA HORTOLANDIA                                                                                        | Instituto Butantan / Mendelics                                                                                       | Antonio Jorge Martins; Bianca Cechetto Carlos. Mendelics; Bibiana Santos; Claudia Renata dos Santos Barros; Cintia Bittar; David Schlesinger. Hemocentro Ribeirão Preto; Simone Kashima; Debora Botequim Moretti; Elaine Cristina Marquize; Elaine Vieira dos Santos; Elisângela Chicaroni Mattos; Erika Freitas; Evandra Strazza Rodrigues; Felipe Allan da Silva da Costa; Flavia Aburjalie; Fábio Sossai Possebon; Guilherme Campos; Guilherme Targino Valente; Heidge Fukumasu. USP-Butucatu; Rejane Maria Tommasini Grotto; Helena Lage Ferreira; Instituto Butantan; Dimas Tadeu Covas; Jardelina de Souza Tooda Bernardino; Jayme A. Souza-Neto; Jessica Cristina Chagas Lesbon; Jorge A. Petrolli Marchesi; José Salvatore Leister Patané; João Paulo Kitajima; João Pessoa Araújo Jr.; Leila Sabrina Ullmann; Loyze Paola Oliveira de Lima; Luiz Aurelio de Campos Crispim. Centro de Genômica Funcional da ESALQ; Luiz Lehmann Coutinho; Luiz Carlos Junior de Alcantara; Livia Sachetto; Maise C. Pereira Parra; Maria Carolina Elias; Marta Giovanetti; Marliia Moraes; Maurício Lacerda Nogueira. Prefeitura de Sao Paulo; Melissa Palmieri.; Patricia Akemi Assato; Paula Rahal; Paulo Inacio da Costa; Rafael dos Santos Bezerra; Raquel de Lello Rocha Campos Cassano. NGS Soluções Genômicas; Pilar Drummond Sampaio Corrêa Mariani. FZEA-USP Pirassununga; Mirele Daiana Polet; Raul Machado Neto; Ricardo Augusto Brassalotti; Ricardo Haddad; Rodrigo Tocantins Calado. FAMERP-SJRP; Cecília Artico Banho; Sandra Coccuzzo Sampaio; Svetoslav Nanev Slavov; Vagner Fonseca; Vincent Louis Viala                                                                                                                              |
| EPI_ISL_1966163                                                                                                                                                                                                                                                                                                                                                                                                                                                                                                                               | UNIDADE SAUDE FAMILIA DR PIERRE ANTONIO COPPIETERS AREALVA                                                                   | Instituto Butantan                                                                                                   | Antonio Jorge Martins; Claudia Renata dos Santos Barros; David Schlesinger; Debora Botequim Moretti; Dimas Tadeu Covas; Elaine Cristina Marquize; Elaine Vieira Santos; Evandra Strazza Rodrigues; Heidge Fukumasu; Jayme Augusto de Souza-Neto; José Salvatore Leister Patané; Luiz Alcantara; Luiz Lehmann Coutinho; Maria Carolina Elias; Maurício Lacerda Nogueira; Rafael dos Santos Bezerra; Raul Machado Neto; Rejane Maria Tommasini Grotto; Ricardo Haddad; Sandra Coccuzzo Sampaio Vessoni; Simone Kashima; Svetoslav Nanev Slavov; Vincent Louis Viala                                                                                                                                                                                                                                                                                                                                                                                                                                                                                                                                                                                                                                                                                                                                                                                                                                                                                                                                                                                                                                                                                                                                                                                |
| EPI_ISL_2493808, EPI_ISL_5646707                                                                                                                                                                                                                                                                                                                                                                                                                                                                                                              | UNILABS                                                                                                                      | Instituto Nacional de Saude (INSA)                                                                                   | Borges et al                                                                                                                                                                                                                                                                                                                                                                                                                                                                                                                                                                                                                                                                                                                                                                                                                                                                                                                                                                                                                                                                                                                                                                                                                                                                                                                                                                                                                                                                                                                                                                                                                                                                                                                                     |
| EPI_ISL_7450821                                                                                                                                                                                                                                                                                                                                                                                                                                                                                                                               | UOC Microbiologia e Virologia, Azienda Ospedaliera San Camillo-Forlanini-Rome                                                | University Campus Bio-Medico of Rome (UCBM)                                                                          | Angeletti S.; De Florio L.; Fogolari M.; Francesconi M.; Lintas C.; Riva E.; Veralli R.                                                                                                                                                                                                                                                                                                                                                                                                                                                                                                                                                                                                                                                                                                                                                                                                                                                                                                                                                                                                                                                                                                                                                                                                                                                                                                                                                                                                                                                                                                                                                                                                                                                          |
| EPI_ISL_6810846                                                                                                                                                                                                                                                                                                                                                                                                                                                                                                                               | UOC Patologia Clinica, Ospedale Fabrizio Spaziani, Frosinone, Italy                                                          | University Campus Bio-Medico of Rome (UCBM)                                                                          | Angeletti S.; De Florio L.; Fogolari M.; Francesconi M.; Lintas C.; Riva E.; Veralli R.                                                                                                                                                                                                                                                                                                                                                                                                                                                                                                                                                                                                                                                                                                                                                                                                                                                                                                                                                                                                                                                                                                                                                                                                                                                                                                                                                                                                                                                                                                                                                                                                                                                          |
| EPI_ISL_4063597, EPI_ISL_1966893                                                                                                                                                                                                                                                                                                                                                                                                                                                                                                              | UPA ATALAA DRA RITA DE CASSIA SORIO                                                                                          | Instituto Butantan / ESALQ-USP (Piracicaba)                                                                          | Antonio Jorge Martins; Bianca Cechetto Carlos. Mendelics; Bibiana Santos; Claudia Renata dos Santos Barros; Cintia Bittar; David Schlesinger. Hemocentro Ribeirão Preto; Simone Kashima; Debora Botequim Moretti; Elaine Cristina Marquize; Elaine Vieira dos Santos; Elisângela Chicaroni Mattos; Erika Freitas; Evandra Strazza Rodrigues; Felipe Allan da Silva da Costa; Flavia Aburjalie; Fábio Sossai Possebon; Guilherme Campos; Guilherme Targino Valente; Heidge Fukumasu. USP-Butucatu; Rejane Maria Tommasini Grotto; Helena Lage Ferreira; Instituto Butantan; Dimas Tadeu Covas; Jardelina de Souza Tooda Bernardino; Jayme A. Souza-Neto; Jessica Cristina Chagas Lesbon; Jorge A. Petrolli Marchesi; José Salvatore Leister Patané; João Paulo Kitajima; João Pessoa Araújo Jr.; Leila Sabrina Ullmann; Loyze Paola Oliveira de Lima; Luiz Aurelio de Campos Crispim. Centro de Genômica Funcional da ESALQ; Luiz Lehmann Coutinho; Luiz Carlos Junior de Alcantara; Livia Sachetto; Maise C. Pereira Parra; Maria Carolina Elias; Marta Giovanetti; Marliia Moraes; Maurício Lacerda Nogueira. Prefeitura de Sao Paulo; Melissa Palmieri.; Patricia Akemi Assato; Paula Rahal; Paulo Inacio da Costa; Rafael dos Santos Bezerra; Raquel de Lello Rocha Campos Cassano. NGS Soluções Genômicas; Pilar Drummond Sampaio Corrêa Mariani. FZEA-USP Pirassununga; Mirele Daiana Polet; Raul Machado Neto; Ricardo Augusto Brassalotti; Ricardo Haddad; Rodrigo Tocantins Calado. FAMERP-SJRP; Cecília Artico Banho; Sandra Coccuzzo Sampaio; Svetoslav Nanev Slavov; Vagner Fonseca; Vincent Louis Viala                                                                                                                              |
| EPI_ISL_5651165                                                                                                                                                                                                                                                                                                                                                                                                                                                                                                                               | UPA DE BEBEDOURO                                                                                                             | Instituto Butantan                                                                                                   | Antonio Jorge Martins; Claudia Renata dos Santos Barros; David Schlesinger; Debora Botequim Moretti; Dimas Tadeu Covas; Elaine Cristina Marquize; Elaine Vieira Santos; Evandra Strazza Rodrigues; Heidge Fukumasu; Jayme Augusto de Souza-Neto; José Salvatore Leister Patané; Luiz Alcantara; Luiz Lehmann Coutinho; Maria Carolina Elias; Maurício Lacerda Nogueira; Rafael dos Santos Bezerra; Raul Machado Neto; Rejane Maria Tommasini Grotto; Ricardo Haddad; Sandra Coccuzzo Sampaio Vessoni; Simone Kashima; Svetoslav Nanev Slavov; Vincent Louis Viala                                                                                                                                                                                                                                                                                                                                                                                                                                                                                                                                                                                                                                                                                                                                                                                                                                                                                                                                                                                                                                                                                                                                                                                |
| EPI_ISL_5651344                                                                                                                                                                                                                                                                                                                                                                                                                                                                                                                               | UPA DR AKIRA TADA                                                                                                            | Instituto Butantan                                                                                                   | Antonio Jorge Martins; Claudia Renata dos Santos Barros; David Schlesinger; Debora Botequim Moretti; Dimas Tadeu Covas; Elaine Cristina Marquize; Elaine Vieira Santos; Evandra Strazza Rodrigues; Heidge Fukumasu; Jayme Augusto de Souza-Neto; José Salvatore Leister Patané; Luiz Alcantara; Luiz Lehmann Coutinho; Maria Carolina Elias; Maurício Lacerda Nogueira; Rafael dos Santos Bezerra; Raul Machado Neto; Rejane Maria Tommasini Grotto; Ricardo Haddad; Sandra Coccuzzo Sampaio Vessoni; Simone Kashima; Svetoslav Nanev Slavov; Vincent Louis Viala                                                                                                                                                                                                                                                                                                                                                                                                                                                                                                                                                                                                                                                                                                                                                                                                                                                                                                                                                                                                                                                                                                                                                                                |
| EPI_ISL_5668310                                                                                                                                                                                                                                                                                                                                                                                                                                                                                                                               | UPA DR FRANCO DA ROCHA                                                                                                       | Instituto Butantan                                                                                                   | Antonio Jorge Martins; Claudia Renata dos Santos Barros; David Schlesinger; Debora Botequim Moretti; Dimas Tadeu Covas; Elaine Cristina Marquize; Elaine Vieira Santos; Evandra Strazza Rodrigues; Heidge Fukumasu; Jayme Augusto de Souza-Neto; José Salvatore Leister Patané; Luiz Alcantara; Luiz Lehmann Coutinho; Maria Carolina Elias; Maurício Lacerda Nogueira; Rafael dos Santos Bezerra; Raul Machado Neto; Rejane Maria Tommasini Grotto; Ricardo Haddad; Sandra Coccuzzo Sampaio Vessoni; Simone Kashima; Svetoslav Nanev Slavov; Vincent Louis Viala                                                                                                                                                                                                                                                                                                                                                                                                                                                                                                                                                                                                                                                                                                                                                                                                                                                                                                                                                                                                                                                                                                                                                                                |
| EPI_ISL_7378993                                                                                                                                                                                                                                                                                                                                                                                                                                                                                                                               | UPA DR LUIS ATILIO LOSI VIANA RIBEIRAO PRETO                                                                                 | Instituto Butantan                                                                                                   | Antonio Jorge Martins; Claudia Renata dos Santos Barros; David Schlesinger; Debora Botequim Moretti; Dimas Tadeu Covas; Elaine Cristina Marquize; Elaine Vieira Santos; Evandra Strazza Rodrigues; Heidge Fukumasu; Jayme Augusto de Souza-Neto; José Salvatore Leister Patané; Luiz Alcantara; Luiz Lehmann Coutinho; Maria Carolina Elias; Maurício Lacerda Nogueira; Rafael dos Santos Bezerra; Raul Machado Neto; Rejane Maria Tommasini Grotto; Ricardo Haddad; Sandra Coccuzzo Sampaio Vessoni; Simone Kashima; Svetoslav Nanev Slavov; Vincent Louis Viala                                                                                                                                                                                                                                                                                                                                                                                                                                                                                                                                                                                                                                                                                                                                                                                                                                                                                                                                                                                                                                                                                                                                                                                |
| EPI_ISL_2155558                                                                                                                                                                                                                                                                                                                                                                                                                                                                                                                               | UPLB Covid-19 Molecular Diagnostic Laboratory                                                                                | Phillipine Genome Center                                                                                             | Alethea R. de Guzman; Anna Ong-Lim; Arienne A. Zamora; Asia Louisa U. Chong; Benedict A. Maralit; Candice Joneshka B. Tambaoan; Carlo M. Lapid; Celis Carlos; Devon Ray Pacial; Edell Maurice Salvaña; El King D. Morayo; Eva Maria Cutiongco-de la Paz; Francis A. Tablizo; Irish Coleen A. Asin; Jaime C. Montoya; Jan Michael C. Yap; Jo-Hannah S. Llamas; John Q. Wong; Joshua Gregor A. Dizon; Juan Antonio R. Magalanga; Karol Sophia Aguirre; Padilla; Kenneth M. Kim; Kris P. Munayan; Marc Edsel C. Ayes; Marc Jerrone R. Castro; Maria Rosario Singh-Vergeire and Cynthia P. Saloma; Maria Sofia L. Yangzon; Marissa Alejandria; Razel Nikka M. Hao; Rianna Patricia S. Cruz; Sheila Mae M. Araiza                                                                                                                                                                                                                                                                                                                                                                                                                                                                                                                                                                                                                                                                                                                                                                                                                                                                                                                                                                                                                                     |
| EPI_ISL_2775831                                                                                                                                                                                                                                                                                                                                                                                                                                                                                                                               | UPMC Clinical Microbiology Laboratory                                                                                        | Microbial Genome Sequencing Center; Microbial Genomic Epidemiology Laboratory, University of Pittsburgh              | Daniel J. Snyder; Jane W. Marsh; Kady D. Waggle; Lee H. Harrison; Marissa P. Griffith; Vatsala R. Srinivasa; Vaughn S. Cooper                                                                                                                                                                                                                                                                                                                                                                                                                                                                                                                                                                                                                                                                                                                                                                                                                                                                                                                                                                                                                                                                                                                                                                                                                                                                                                                                                                                                                                                                                                                                                                                                                    |
| EPI_ISL_2920246, EPI_ISL_7542385                                                                                                                                                                                                                                                                                                                                                                                                                                                                                                              | URMC LABS                                                                                                                    | URMC LABS                                                                                                            | Andrew Cameron; Dwight Hardy; Kelly DeLary; Stepan Voljehn                                                                                                                                                                                                                                                                                                                                                                                                                                                                                                                                                                                                                                                                                                                                                                                                                                                                                                                                                                                                                                                                                                                                                                                                                                                                                                                                                                                                                                                                                                                                                                                                                                                                                       |
| EPI_ISL_1855268, EPI_ISL_2868242                                                                                                                                                                                                                                                                                                                                                                                                                                                                                                              | URMC LABS                                                                                                                    | Wadsworth Center, New York State Department of Health                                                                | Alexis Russell; Catharine Prussing; Daryl M. Lamson; Erasmus Schneider; Erica Lasek-Nesselquist; John Kelly; Jonathan Pitnick; Kirsten St. George; Matthew Shudt; Melissa A Leisner; Navjot Singh                                                                                                                                                                                                                                                                                                                                                                                                                                                                                                                                                                                                                                                                                                                                                                                                                                                                                                                                                                                                                                                                                                                                                                                                                                                                                                                                                                                                                                                                                                                                                |
| EPI_ISL_2383497, EPI_ISL_3941892, EPI_ISL_4822907, EPI_ISL_4888946, EPI_ISL_5688266, EPI_ISL_6136254, EPI_ISL_7831219, EPI_ISL_8713908, EPI_ISL_8713911                                                                                                                                                                                                                                                                                                                                                                                       | see above                                                                                                                    | US Air Force School of Aerospace Medicine                                                                            | Amanda Javorina; Anthony Fries; Carol Garrett; Clarise Starr; Cole Anderson; Deanna Muehleman; Elizabeth Macias; Fritz Castillo; Jennifer Black; Jennifer Meyer; Kelsey Lanter; Sarah Purves; William Gruner                                                                                                                                                                                                                                                                                                                                                                                                                                                                                                                                                                                                                                                                                                                                                                                                                                                                                                                                                                                                                                                                                                                                                                                                                                                                                                                                                                                                                                                                                                                                     |
| EPI_ISL_2617835                                                                                                                                                                                                                                                                                                                                                                                                                                                                                                                               | USC Clinical Lab                                                                                                             | US Air Force School of Aerospace Medicine                                                                            | P. Hemarajata et al.                                                                                                                                                                                                                                                                                                                                                                                                                                                                                                                                                                                                                                                                                                                                                                                                                                                                                                                                                                                                                                                                                                                                                                                                                                                                                                                                                                                                                                                                                                                                                                                                                                                                                                                             |
| EPI_ISL_8687686                                                                                                                                                                                                                                                                                                                                                                                                                                                                                                                               | USF SANTA ANTONIETA II                                                                                                       | Instituto Butantan                                                                                                   | Antonio Jorge Martins; Claudia Renata dos Santos Barros; David Schlesinger; Debora Botequim Moretti; Dimas Tadeu Covas; Elaine Cristina Marquize; Elaine Vieira Santos; Evandra Strazza Rodrigues; Heidge Fukumasu; Jayme Augusto de Souza-Neto; José Salvatore Leister Patané; Luiz Alcantara; Luiz Lehmann Coutinho; Maria Carolina Elias; Maurício Lacerda Nogueira; Rafael dos Santos Bezerra; Raul Machado Neto; Rejane Maria Tommasini Grotto; Ricardo Haddad; Sandra Coccuzzo Sampaio Vessoni; Simone Kashima; Svetoslav Nanev Slavov; Vincent Louis Viala                                                                                                                                                                                                                                                                                                                                                                                                                                                                                                                                                                                                                                                                                                                                                                                                                                                                                                                                                                                                                                                                                                                                                                                |
| EPI_ISL_7265758                                                                                                                                                                                                                                                                                                                                                                                                                                                                                                                               | UT-Unified State Labs: Public Health Utah DOH                                                                                | Centers for Disease Control and Prevention Division of Viral Diseases, Pathogen Discovery                            | Alex Burgin; Ben Rambo-Martin; Clinton Paden; Dakota Howard; Dave Wentworth; Dhvani Batra; Jasmine Padilla; Joseph Madden; Justin Lee; Kristen Knipe; Kristine Lacek; Mark Burroughs; Matthew Schmeer; Meghan Bentz; Mill Sheth; Peter Cook; Sam Shepard; Sarah Nobles; Vivien Dugan; Vette Unoanumhi                                                                                                                                                                                                                                                                                                                                                                                                                                                                                                                                                                                                                                                                                                                                                                                                                                                                                                                                                                                                                                                                                                                                                                                                                                                                                                                                                                                                                                            |
| EPI_ISL_1616715, EPI_ISL_1628239, EPI_ISL_2002477, EPI_ISL_2002728, EPI_ISL_2002776, EPI_ISL_2002900, EPI_ISL_2037504, EPI_ISL_2037540, EPI_ISL_2086359, EPI_ISL_2273758, EPI_ISL_2340717, EPI_ISL_2501437, EPI_ISL_2502996, EPI_ISL_2603906, EPI_ISL_2693174, EPI_ISL_2803169, EPI_ISL_3161116, EPI_ISL_3411217, EPI_ISL_3412318, EPI_ISL_3412384, EPI_ISL_3693079, EPI_ISL_3759588, EPI_ISL_3984268, EPI_ISL_4392735, EPI_ISL_4395498, EPI_ISL_4434998, EPI_ISL_4472884, EPI_ISL_4569261, EPI_ISL_4742496, EPI_ISL_8128099, EPI_ISL_8131731 | see above                                                                                                                    | UW Virology Lab                                                                                                      | Alexander Greninger; Hong Xie; Isabel Arnould; Keith R Jerome; Lasata Shrestha; Margaret Mills; Maria Lukes; Meeli-Li Huang; Michelle Lin; Nathan Brent; Noah Baker; Noah R. Baker; Patrick Mathias; Pavitra Roychoudhury; Pooneh Hajian; Ricardo Perez; Robert J. Livingston; Saraswathi Sathees; Savanna S. Carmack; Sean Ellis; Seffir T. Wendm; Shah Mohamed Bakhash; Tien V. Nguyen                                                                                                                                                                                                                                                                                                                                                                                                                                                                                                                                                                                                                                                                                                                                                                                                                                                                                                                                                                                                                                                                                                                                                                                                                                                                                                                                                         |
| EPI_ISL_734630, EPI_ISL_734742                                                                                                                                                                                                                                                                                                                                                                                                                                                                                                                | UZ Leuven, National Reference Laboratory for Coronaviruses, Laboratory Medicine, Leuven, Belgium                             | KU Leuven, Rega Institute, Clinical and Epidemiological Virology                                                     | Bert Vanmechelen; Joan Marti-Carreras; Piet Maes; Tony Wawina-Bokalanga                                                                                                                                                                                                                                                                                                                                                                                                                                                                                                                                                                                                                                                                                                                                                                                                                                                                                                                                                                                                                                                                                                                                                                                                                                                                                                                                                                                                                                                                                                                                                                                                                                                                          |
| EPI_ISL_5801400                                                                                                                                                                                                                                                                                                                                                                                                                                                                                                                               | Ubs Jose Augusto Batista Filho Meneguetti                                                                                    | Instituto Butantan                                                                                                   | Antonio Jorge Martins; Claudia Renata dos Santos Barros; David Schlesinger; Debora Botequim Moretti; Dimas Tadeu Covas; Elaine Cristina Marquize; Elaine Vieira Santos; Evandra Strazza Rodrigues; Heidge Fukumasu; Jayme Augusto de Souza-Neto; José Salvatore Leister Patané; Luiz Alcantara; Luiz Lehmann Coutinho; Maria Carolina Elias; Maurício Lacerda Nogueira; Rafael dos Santos Bezerra; Raul Machado Neto; Rejane Maria Tommasini Grotto; Ricardo Haddad; Sandra Coccuzzo Sampaio Vessoni; Simone Kashima; Svetoslav Nanev Slavov; Vincent Louis Viala                                                                                                                                                                                                                                                                                                                                                                                                                                                                                                                                                                                                                                                                                                                                                                                                                                                                                                                                                                                                                                                                                                                                                                                |
| EPI_ISL_5193929                                                                                                                                                                                                                                                                                                                                                                                                                                                                                                                               | Unidad de Investigación Biomédica de Zacatecas (UIBZ)                                                                        | Centro de Investigación en Enfermedades Infecciosas (CIENI), Instituto Nacional de Enfermedades Respiratorias (INER) | Alejandra García-Gasca; Alejandra Hernández-Terán; Alejandro Sánchez-Flores; Alfredo Herrera-Estrella; Alicia Ocaña-Mondragón; Andreu Comas-García; Angel Gustavo Salas-Lais; Antonio Loza Román; Bernardo Martínez-Miguel; Blanca Taboada; Brenda Irasema Maldonado-Meza; Bruno Gómez-Gil; Carla Ivón Herrera-Najera; Carlos F. Arias; Celia Boukadid; Clara Esperanza Santacruz-Tinoco; Concepción Grajalés-Muñiz; Consorcio Mexicano de Vigilancia Genómica (CoVGen-Mex). Authors (in alphabetical order): Julio Elias Alvarado-Yaah; Cristóbal Cháidez-Quiróz; Célida Duque Molina; Célida Martínez-Rodríguez; Daniel Fregoso-Rueda; Daniel Lira Morales; Eduardo Becerril-Vargas; Eduardo Rivera-Martínez; Fernando Fontove-Herrera; Fidencio Mejía-Nepomuceno; Francisco Pulido; Gabriel Chavira-Trujillo; Gloria Elena Espinosa-Ayala; Gloria María Molina-Salinas; Gloria Vazquez; Hector Montoya-Fuentes; Helen Haydee Fernanda Ramirez-Plascencia; Irvin González-López; Jean Pierre González; Jesús Hernández; Joel Armando Vázquez-Pérez.; Jorge Salas-Hernández; José Antonio Enciso-Moreno; José Arturo Martínez-Orozco; José Esteban Muñoz-Medina; José de Jesús Nuñez-Contreras; Juan Bautista Chale-Dzul; Julissa Enciso-Ibarra; Kathia Elizabeth Tapia-Díaz; Luis Alberto Ochoa-Carrera; Margarita Matías-Florentino; Mario Mújica-Sánchez; Marissa Perez-García; María Eugenia Jiménez-Corona; María Guadalupe Santiago-Mauricio; María Guadalupe de Jesús Mireles-Rivera; Nelly Sélem-Mojica; Pavel Isa; Ricardo Círia Merce; Ricardo Grande; Rosa María Gutiérrez Ríos; Rosario Vázquez-Larios; Santiago Ávila-Ríos; Selene Zárate; Susana Lopez; Verónica Mata-Haro; Victor Eduardo García-Arias; Victor Hugo Borja-Aburto |
| EPI_ISL_4878697                                                                                                                                                                                                                                                                                                                                                                                                                                                                                                                               | Unidad de Investigación Médica de Yucatán (IIMY)                                                                             | Instituto de Biotecnología de la UNAM                                                                                | ; Alejandra García-Gasca; Alejandra Hernández-Terán; Alejandro Sánchez-Flores; Alfredo Herrera-Estrella; Alicia Ocaña-Mondragón; Andreu Comas-García; Angel Gustavo Salas-Lais; Antonio Loza Román; Bernardo Martínez-Miguel; Blanca Taboada; Brenda Irasema Maldonado-Meza; Bruno Gómez-Gil; Carla Ivón Herrera-Najera; Carlos F. Arias; Celia Boukadid; Clara Esperanza Santacruz-Tinoco; Concepción Grajalés-Muñiz; Consorcio Mexicano de Vigilancia Genómica (CoVGen-Mex). Authors (in alphabetical order): Julio Elias Alvarado-Yaah; Cristóbal Cháidez-Quiróz; Célida Duque Molina; Célida Martínez-Rodríguez; Daniel Fregoso-Rueda; Daniel Lira Morales; Eduardo Becerril-Vargas; Fernando Fontove-Herrera; Fidencio Mejía-Nepomuceno; Francisco Pulido; Gloria Elena Espinosa-Ayala; Gloria María Molina-Salinas; Gloria Vazquez; Hector Esteban Paz-Juárez; Hector Montoya-Fuentes; Helen Haydee Fernanda Ramirez-Plascencia; Irvin González-López; Jean Pierre González; Jesús Hernández; Joel Armando Vázquez-Pérez.; Jorge Salas-Hernández; José Antonio Enciso-Moreno; José Arturo Martínez-Orozco; José Esteban Muñoz-Medina; José de Jesús Nuñez-Contreras; Juan Bautista Chale-Dzul; Julissa Enciso-Ibarra; Kathia Elizabeth Tapia-Díaz; Luis Alberto Ochoa-Carrera; Margarita Matías-Florentino; Mario Mújica-Sánchez; Marissa Perez-García; María Guadalupe Santiago-Mauricio; María Guadalupe de Jesús Mireles-Rivera; Nelly Sélem-Mojica; Pavel Isa; Ricardo Círia Merce; Ricardo Grande; Rosa María Gutiérrez Ríos; Santiago Ávila-Ríos; Selene Zárate; Susana Lopez; Verónica Mata-Haro; Victor Eduardo García-Arias; Victor Hugo Borja-Aburto                                                                             |

|                                                                                                                                     |                                                                                                                                                    |                                                                                                                                                                                                                                               |                                                                                                                                                                                                                                                                                                                                                                                                                                                                                                                                                                                                                                                                                                                                                                                                                                                                                                                                                                                                                     |
|-------------------------------------------------------------------------------------------------------------------------------------|----------------------------------------------------------------------------------------------------------------------------------------------------|-----------------------------------------------------------------------------------------------------------------------------------------------------------------------------------------------------------------------------------------------|---------------------------------------------------------------------------------------------------------------------------------------------------------------------------------------------------------------------------------------------------------------------------------------------------------------------------------------------------------------------------------------------------------------------------------------------------------------------------------------------------------------------------------------------------------------------------------------------------------------------------------------------------------------------------------------------------------------------------------------------------------------------------------------------------------------------------------------------------------------------------------------------------------------------------------------------------------------------------------------------------------------------|
| EPI_ISL_3072199,<br>EPI_ISL_3614925,<br>EPI_ISL_5501324                                                                             | Unidade de apoio ao diagnostico da COVID - UNADIG                                                                                                  | Bioinformatics Laboratory / LNCC                                                                                                                                                                                                              | Alessandra P Lamacara; Alexandra L Gerber; Amílcar Tanuri; Ana Paula de C Guimarães; Ana Tereza R Vasconcelos; Andrea Cony Cavalcanti; Caio Luiz Pereira Ribeiro; Cassia Alves; Cintya Policarpo; Claudia Maria Braga de Mello; Cristiane Gomes da Silva; Diana Mariani; Douglas Terra Machado; Erica Ramos dos Santos Nascimento; Fernanda Leitao dos Santos; Flavio Dias da Silva; Gleidson da Silva de Oliveira; Leandro Magalhães de Souza; Liliane Cavalcante; Luiz G P de Almeida; Marcio Henrique de Oliveira Garcia; Mario Sergio Ribeiro; Ricardo Jose Barbosa Salviano; Ronaldo da Silva F Jr; Sílvia Carvalho                                                                                                                                                                                                                                                                                                                                                                                            |
| EPI_ISL_5150163                                                                                                                     | Unilabs                                                                                                                                            | Institute of Medical Virology                                                                                                                                                                                                                 | Alexandra Trkola; Annette Audigé; Catharine Aquino; Cyril Shah; Daniel Ehrsam; Gabriela Ziltener; Guido Bloemberg; Hubert Rehrauer; Isabel Stürmer; Joel Wirz; Jon Huder; Jürg Böni; Kevin Steiner; Maria Grünberg; Maryam Zaheri; Michael Huber; Riccarda Capaul; Stefan Schmutz; Verena Kufner; Weihong Qi                                                                                                                                                                                                                                                                                                                                                                                                                                                                                                                                                                                                                                                                                                        |
| EPI_ISL_8256668                                                                                                                     | Unilabs BIOCT                                                                                                                                      | Department of Virology, Henri Mondor University Hospital, Assistance Publique Hôpitaux de Paris, Université Paris-Est Créteil, INSERM U955                                                                                                    | Alexandre Soulier; Christophe Rodriguez; Elisabeth Gricourt; Guillaume Gricourt; Jean-Michel Pawlotsky; Melissa N'Debi; Slim Fourati; Vanessa Demontant                                                                                                                                                                                                                                                                                                                                                                                                                                                                                                                                                                                                                                                                                                                                                                                                                                                             |
| EPI_ISL_4060511,<br>EPI_ISL_8415627                                                                                                 | Unilabs Laboratory Medicine                                                                                                                        | Norwegian Institute of Public Health, Department of Virology                                                                                                                                                                                  | Atiya R Ali; Debech Nadia; Engebretsen Serina Beate; Garcia Llorente Ignacio; Hilde Elshaug; Hilde Vollan; Jon Bråte; Kamilla Heddeland Instefjord; Karoline Bragstad; Kathrine Stene-Johansen; Line Victoria Moen; Marie Paulsen Madsen; Olav Hungnes; Pedersen Benedikte Nevjen; Rasmus Riis Kopperud                                                                                                                                                                                                                                                                                                                                                                                                                                                                                                                                                                                                                                                                                                             |
| EPI_ISL_412980                                                                                                                      | Union Hospital of Tongji Medical College, Huazhong University of Science and Technology                                                            | Hubei Provincial Center for Disease Control and Prevention                                                                                                                                                                                    | Bin Fang; Bo Yang; Bo Yu; Faxian Zhan; Guojun Ye; Jing Li; Junqiang Xu; Kun Cai; Linlin Liu; Xiang Li; Xiao Yu; Xixiang Huo; Yongzhong Jiang.                                                                                                                                                                                                                                                                                                                                                                                                                                                                                                                                                                                                                                                                                                                                                                                                                                                                       |
| EPI_ISL_7726884                                                                                                                     | United Hospital Center                                                                                                                             | WVU and Marshall University Combined Genomics Core Facilities                                                                                                                                                                                 | James Denvir; Peter Perrotta; Peter Stoilov; Ryan Percifield; Wesley Kimble                                                                                                                                                                                                                                                                                                                                                                                                                                                                                                                                                                                                                                                                                                                                                                                                                                                                                                                                         |
| EPI_ISL_570006                                                                                                                      | Unity Health Toronto                                                                                                                               | Ontario Institute for Cancer Research                                                                                                                                                                                                         | Bernard Lam; Felicia Vincelli; Ilinca Lungu; Jared T. Simpson; Jeremy Johns; Karel Boissinot; Larissa M. Matukas; Le Lu; Mark Downing; Paul Krzyzanowski; Philip Zuzarte; Ramzi Fattouh; Richard de Borja; Samira Mubareka; TIBDN; Trina Otterman; Wai Sum Siu; Yan Chen; Zhi Cui                                                                                                                                                                                                                                                                                                                                                                                                                                                                                                                                                                                                                                                                                                                                   |
| EPI_ISL_3505613                                                                                                                     | Universidad Estatal de Bolivar                                                                                                                     | Institute of Microbiology, Universidad San Francisco de Quito                                                                                                                                                                                 | Anita García; Belén Prado-Vivar; Bernardo Gutiérrez; Carlos Julio Tobar; Erika B. Muñoz; Fernanda Zurita; Gabriel Trueba; Juan José Guadalupe; Karina Barragán; Michelle Grunauer; Monica Becerra-Wong; Patricio Rojas-Silva; Paúl Cárdenas; René Bracho; Stephanie Arregui; Sully Márquez; Verónica Barragán                                                                                                                                                                                                                                                                                                                                                                                                                                                                                                                                                                                                                                                                                                       |
| EPI_ISL_3550672<br>EPI_ISL_7378211                                                                                                  | University Campus Bio-Medico of Rome (UCBM)<br>University Clinical Hospital of Mostar, Department of Microbiology and Molecular Diagnostics        | University Campus Bio-Medico of Rome (UCBM)<br>University of Sarajevo, Veterinary Faculty, Laboratory for Molecular Diagnostic and Research                                                                                                   | Angeletti S.; De Florio L.; Fogolari M.; Francesconi M.; Lintas C.; Riva E.; Veralli R.<br>Goletic S.; Goletic T.; Herceg I.; Hodzic A.; Jazic A.; Nivecic M.; Ostojic M.; Sabic E.; Skocibusic S.; Softic A.; Terzic I                                                                                                                                                                                                                                                                                                                                                                                                                                                                                                                                                                                                                                                                                                                                                                                             |
| EPI_ISL_920579                                                                                                                      | University College London Hospital                                                                                                                 | COVID-19 Genomics UK (COG-UK) Consortium                                                                                                                                                                                                      | Catherine Houlihan; Dan Frampton; Judith Heaney; Matthew Byott; Moira Spyer and Eleni Nastouli; Stuart Kirk                                                                                                                                                                                                                                                                                                                                                                                                                                                                                                                                                                                                                                                                                                                                                                                                                                                                                                         |
| EPI_ISL_573484, EPI_ISL_741203, EPI_ISL_3771793, EPI_ISL_6972526, EPI_ISL_6972613, EPI_ISL_6972841, EPI_ISL_7509261                 | see above                                                                                                                                          | University College London, Great Ormond Street Hospital for Children NHS Foundation Trust, Imperial College Healthcare NHS Trust                                                                                                              | Alison Holmes; Charlotte Williams; Helena Tutill; Jacqueline Findlay; James Price; Judith Breuer; Julianne Brown; Kathryn Harris; Leysa Forrest; Maris Cotic; Mark Kristiansen; Nadua Bayzid; Paola Niola; Paola Resende Silva; Patricia Dyal; Paul Randell; Rachel Williams; Samuel Weeks; Sergio Castellano; Sunando Roy; Tony Brooks; Yasmin Panchbhaya                                                                                                                                                                                                                                                                                                                                                                                                                                                                                                                                                                                                                                                          |
| EPI_ISL_982823                                                                                                                      | University Health Network/Mount Sinai Hospital Department of Microbiology                                                                          | Ontario Institute for Cancer Research                                                                                                                                                                                                         | Aimee Paterson; Allison McGeer; Angel Liu; Bernard Lam; Cassandra Bergwerff; Ilinca Lungu; Jared T. Simpson; Javier Hernandez; Jeff Wrana; Jessica Bourke; Kin Chan; Kuganya Nirmalarajah; Laurence Pelletier; Lawrence E. Heisler; Lubina Kothari; Marc Mazzulli; Marie-Ming Aynaud; Michael Laszloffy; Patryk Aftanas; Paul Krzyzanowski; Richard de Borja; Samira Mubareka; Seda Barutcu; Tony Mazzulli                                                                                                                                                                                                                                                                                                                                                                                                                                                                                                                                                                                                          |
| EPI_ISL_1388787<br>EPI_ISL_5633929,<br>EPI_ISL_6960199,<br>EPI_ISL_7466656                                                          | University Hospital Basel, Clinical Virology<br>University Hospital of Northern Norway, Department for Microbiology and Infectious Disease Control | University Hospital Basel, Clinical Bacteriology<br>Norwegian Institute of Public Health, Department of Virology                                                                                                                              | Adrian Egli; Alfredo Mari; Hans Hirsch; Helena MB Seth-Smith; Julia Bielicki; Karoline Leuzinger; Madlen Stange; Manuel Battagay; Tim Roloff<br>Atiya R Ali; Debech Nadia; Engebretsen Serina Beate; Garcia Llorente Ignacio; Hilde Elshaug; Hilde Vollan; Jon Bråte; Kamilla Heddeland Instefjord; Karoline Bragstad; Kathrine Stene-Johansen; Line Victoria Moen; Marie Paulsen Madsen; Olav Hungnes; Pedersen Benedikte Nevjen; Rasmus Riis Kopperud                                                                                                                                                                                                                                                                                                                                                                                                                                                                                                                                                             |
| EPI_ISL_981592,<br>EPI_ISL_1040254,<br>EPI_ISL_1547484,<br>EPI_ISL_1707982,<br>EPI_ISL_3151316,<br>EPI_ISL_6512622                  | University Hospitals of Geneva, Laboratory of Virology                                                                                             | HUG, Laboratory of Virology and the Health2030 Genome Center                                                                                                                                                                                  | Aline Mamin; Ana Rita Goncalves; Cedric Howald; Deborah Penet; Emmanouil Dermatzakis; Francisco Perez; Henri Pegeot; Ioannis Xenarios; Keith Harshman; Laurent Kaiser; Lorenzo Cerutti; Melyssa Elies; Samuel Cordey                                                                                                                                                                                                                                                                                                                                                                                                                                                                                                                                                                                                                                                                                                                                                                                                |
| EPI_ISL_775931,<br>EPI_ISL_2689474                                                                                                  | University Medical Center Hamburg Eppendorf                                                                                                        | Heinrich Pette Institute, Leibniz Institute for Experimental Virology                                                                                                                                                                         | Adam Grundhoff; Alexis Robitaille; Johannes Knobloch; Martin Aepfelbacher; Nicole Fischer; Thomas Günther                                                                                                                                                                                                                                                                                                                                                                                                                                                                                                                                                                                                                                                                                                                                                                                                                                                                                                           |
| EPI_ISL_679101,<br>EPI_ISL_918603,<br>EPI_ISL_1047041,<br>EPI_ISL_3000468                                                           | University of Birmingham                                                                                                                           | COVID-19 Genomics UK (COG-UK) Consortium                                                                                                                                                                                                      | Alex Richter; Andrew Bosworth; Andrew Bosworth. Queen Elizabeth Hospital; Anna Casey; Andrew D Beggs PHE Heartlands Lab; Husam Osman; Charlotte Poxon; Institute of Microbiology; Joanne Stockton; Josh Quick; Kasun Wanigasooriya; Mike Kidd; Nicholas Loman. University of Birmingham Testing Laboratory; Celina M Whalley; Oliver Pickles; Radoslaw Poplawski; Samuel Nicholls; University of Birmingham; Claire McMurray; Will Rowe                                                                                                                                                                                                                                                                                                                                                                                                                                                                                                                                                                             |
| EPI_ISL_2246687<br>EPI_ISL_665087,<br>EPI_ISL_1247494                                                                               | University of Chicago Medicine<br>University of Exeter                                                                                             | RIPHL at Rush University Medical Center<br>COVID-19 Genomics UK (COG-UK) Consortium                                                                                                                                                           | Cindy Bethel; Felix Araujo Perez; Kevin Kunstman; Laura Furtado; Lauren Megger; Marieta Hyde; Max Kolton; Stefan Green<br>Aaron Jeffries; Audrey Farbos; Ben Temperton; Jane Masoli; Joanna Warwick-Dugdale; Michelle Michelsen; Robyn Manley; Stephen Michell                                                                                                                                                                                                                                                                                                                                                                                                                                                                                                                                                                                                                                                                                                                                                      |
| EPI_ISL_3308629,<br>EPI_ISL_7285296,<br>EPI_ISL_7622390                                                                             | University of Liège COVID-19 testing center                                                                                                        | GIGA Medical Genomics                                                                                                                                                                                                                         | Bouchra Boujemla; Claire Gourzonès; Cécile Meex; Keith Durkin; Laurent Gillet; Maria Artesi; Marie-Pierre Hayette; Nadine Cambisano; Nathalie Renotte; Olivier Ek; Sébastien Bontems; Vincent Bours                                                                                                                                                                                                                                                                                                                                                                                                                                                                                                                                                                                                                                                                                                                                                                                                                 |
| EPI_ISL_495594, EPI_ISL_707844, EPI_ISL_728513, EPI_ISL_1118789, EPI_ISL_1580469, EPI_ISL_1580479, EPI_ISL_5989818, EPI_ISL_6795439 | see above                                                                                                                                          | University of Michigan Clinical Microbiology Laboratory                                                                                                                                                                                       | Gilbert; Valesano; Valesano et al.                                                                                                                                                                                                                                                                                                                                                                                                                                                                                                                                                                                                                                                                                                                                                                                                                                                                                                                                                                                  |
| EPI_ISL_3156337,<br>EPI_ISL_7724397                                                                                                 | University of Mississippi Medical Center, Department of Pathology                                                                                  | University of Mississippi Medical Center, Molecular and Genomics Core Facility                                                                                                                                                                | Ashley C. Johnson; D. Ashley Robinson; Ithiel J. Frame; Krishna K. Ayyalasomayajula; Michael R. Garrett; Wenjie Wu                                                                                                                                                                                                                                                                                                                                                                                                                                                                                                                                                                                                                                                                                                                                                                                                                                                                                                  |
| EPI_ISL_8508948                                                                                                                     | University of New Mexico Hospital                                                                                                                  | Center for Global Health, University of New Mexico Health Sciences Center                                                                                                                                                                     | Darrell Dinwiddie; Daryl Domman; Jesse Young; Jon Femling; Justin Bacca; Kurt Schwalm; Valerie Morley                                                                                                                                                                                                                                                                                                                                                                                                                                                                                                                                                                                                                                                                                                                                                                                                                                                                                                               |
| EPI_ISL_3893528,<br>EPI_ISL_3893648,<br>EPI_ISL_5931324,<br>EPI_ISL_6910110                                                         | University of Oregon COVID-19 MAP Laboratory                                                                                                       | University of Oregon Genomics and Cell Characterization Core Facility (GC3F)                                                                                                                                                                  | Ariana White; Demi Glidden; Douglas Turnbull; Jason Carriere; Jason Sydes; Jeff Bishop; Megan Criss; Peter Batzel; Tina Arredondo                                                                                                                                                                                                                                                                                                                                                                                                                                                                                                                                                                                                                                                                                                                                                                                                                                                                                   |
| EPI_ISL_1531762,<br>EPI_ISL_1791498,<br>EPI_ISL_2007804                                                                             | University of Oregon COVID-19 MAP Laboratory                                                                                                       | University of Oregon Genomics and Cell Characterization Core Facility (GC3F)                                                                                                                                                                  | Ariana White; Douglas Turnbull; Jason Carriere; Jason Sydes; Jeff Bishop; Peter Batzel                                                                                                                                                                                                                                                                                                                                                                                                                                                                                                                                                                                                                                                                                                                                                                                                                                                                                                                              |
| EPI_ISL_501162<br>EPI_ISL_427449, EPI_ISL_436605, EPI_ISL_605768, EPI_ISL_677535, EPI_ISL_872892, EPI_ISL_906196, EPI_ISL_8007991   | University of Washington Virology Lab<br>see above                                                                                                 | University of Washington Virology Lab<br>University of Wisconsin-Madison AIDS Vaccine Research Laboratories                                                                                                                                   | Alexander Greninger; Amin Addetia; Hong Xie; Keith R Jerome; Lasata Shrestha; Meei-Li Huang; Pavitra Roychoudhury; Truong Nguyen; Victoria M Rachleff<br>Gage Moreno; Katarina Braun; et al. AIDS Vaccine Research Laboratories                                                                                                                                                                                                                                                                                                                                                                                                                                                                                                                                                                                                                                                                                                                                                                                     |
| EPI_ISL_2803330<br>EPI_ISL_5544232                                                                                                  | University of Zambia, School of Veterinary Medicine<br>University of the Philippines National Institutes Of Health (UP NIH)                        | UNZAVET and PATH<br>Philippine Genome Center                                                                                                                                                                                                  | Daniel Bridges; Mulenga Mwenda-Chimfwembe; Ngonda Saasa; ZNPHI and ZGSC<br>Alethea R. de Guzman; Anna Ong-Lim; Arianne A. Zamora; Benedict A. Maralit; Carlo M. Lapid; Celia Carlos; Cynthia P. Saloma; Devon Ray Pacial; Diomedes A. Cariño; Edsel Maurice Salvana; El King D. Morado; Elcid Aaron R. Pangilinan; Eva Maria Cutiungco-de-la Paz; Francis A. Tablizo; Henrietta Marie Rodriguez; Jaime C. Montoya; Jan Michael C. Yap; Jarvin E. Nipales; Jo-Hannah S. Llamas; John Q. Wong; Joshua Gregor A. Dizon; Juan Antonio R. Magalang; Karol Sophia Agape R. Padilla; Kenneth M. Kim; Kris P. Punayan; Kristina Patriz Dela Cruz; Lindsay Clare D.L. Carandang; Ma. Exanil Plantig; Marc Edsel C. Ayes; Maria Rosario Singh-Vergeire; Maria Sofia L. Yangzon; Marielle M. Gamboa; Marissa Alejandria; Niña Francesca Bustamante; Razel Nikka M. Hao; Renato Jacinto Q. Mantaring; Rianna Patricia S. Cruz; Shiela Mae M. Araiza; Yvonne Valerie Austria; Zipporah Mariebelle R. Enriquez; Zyrel V. Mollejon |
| EPI_ISL_1572101<br>EPI_ISL_3304598                                                                                                  | Universitätsklinikum Bonn - Institut für Virologie<br>Università degli Studi di Perugia                                                            | Robert Koch Institute<br>Istituto Zooprofilattico Sperimentale dell'Abruzzo e Molise "G. Caporale"                                                                                                                                            | Ancora M; Biagetti M; Calistri P; Camillonì B; Cammà C; Curini V; Delli Compagni E; Di Domenico M; Di Pasquale A; Giammarìoli M; Lorusso A; Mangone I; Marcacci M; Mencacci A; Puglia I; Rinaldi A; Savini G; Scialabba S                                                                                                                                                                                                                                                                                                                                                                                                                                                                                                                                                                                                                                                                                                                                                                                           |
| EPI_ISL_9325211                                                                                                                     | Universität Zürich                                                                                                                                 | Institute of Medical Virology, University of Zurich                                                                                                                                                                                           | Alexandra Trkola; Annette Audigé; Catharine Aquino; Cyril Shah; Daniel Ehrsam; Gabriela Ziltener; Guido Bloemberg; Hubert Rehrauer; Isabel Stürmer; Joel Wirz; Jon Huder; Jürg Böni; Kevin Steiner; Maria Grünberg; Maryam Zaheri; Michael Huber; Riccarda Capaul; Stefan Schmutz; Verena Kufner; Weihong Qi                                                                                                                                                                                                                                                                                                                                                                                                                                                                                                                                                                                                                                                                                                        |
| EPI_ISL_2020326                                                                                                                     | UniversitätsSpital Zürich                                                                                                                          | Institute of Medical Virology                                                                                                                                                                                                                 | Alexandra Trkola; Annette Audigé; Catharine Aquino; Cyril Shah; Daniel Ehrsam; Gabriela Ziltener; Guido Bloemberg; Hubert Rehrauer; Isabel Stürmer; Joel Wirz; Jon Huder; Jürg Böni; Kevin Steiner; Maria Grünberg; Maryam Zaheri; Michael Huber; Riccarda Capaul; Stefan Schmutz; Verena Kufner; Weihong Qi                                                                                                                                                                                                                                                                                                                                                                                                                                                                                                                                                                                                                                                                                                        |
| EPI_ISL_9025291                                                                                                                     | UniversitätsSpital Zürich                                                                                                                          | Institute of Medical Virology, University of Zurich                                                                                                                                                                                           | Alexandra Trkola; Annette Audigé; Catharine Aquino; Cyril Shah; Daniel Ehrsam; Gabriela Ziltener; Guido Bloemberg; Hubert Rehrauer; Isabel Stürmer; Joel Wirz; Jon Huder; Jürg Böni; Kevin Steiner; Maria Grünberg; Maryam Zaheri; Michael Huber; Riccarda Capaul; Stefan Schmutz; Verena Kufner; Weihong Qi                                                                                                                                                                                                                                                                                                                                                                                                                                                                                                                                                                                                                                                                                                        |
| EPI_ISL_6185272,<br>EPI_ISL_7072453,<br>EPI_ISL_8670803                                                                             | Universitätsklinikum Heidelberg                                                                                                                    | Robert Koch Institute                                                                                                                                                                                                                         |                                                                                                                                                                                                                                                                                                                                                                                                                                                                                                                                                                                                                                                                                                                                                                                                                                                                                                                                                                                                                     |
| EPI_ISL_7765446<br>EPI_ISL_6774738                                                                                                  | Universitätsmedizin Mannheim<br>Uniwersyteckie Centrum Kliniczne                                                                                   | Robert Koch Institute<br>287. Tricity SARS-CoV-2 sequencing consortium: University of Gdansk, Medical University of Gdansk, Vaxican Ltd., Invicta Ltd. 2. National Institute of Public Health - National Institute of Hygiene, Warsaw, Poland | Celina Cybulska; Karolina Gackowska; Katarzyna Groth; Katarzyna Zacharczuk; Krystyna Bienkowska Szewczyk; Lukasz Rabalski; Maciej Grzybek; Maciej Kosinski; Magdalena Nowakowska; Marcin Lubocki; Małgorzata Sadkowska-Todys; Tomasz Wołkowicz                                                                                                                                                                                                                                                                                                                                                                                                                                                                                                                                                                                                                                                                                                                                                                      |
| EPI_ISL_3838165                                                                                                                     | Uniwersyteckie Centrum Kliniczne                                                                                                                   | Wojewódzka Stacja Sanitarno-Epidemiologiczna w                                                                                                                                                                                                | Beata Rozwadowska                                                                                                                                                                                                                                                                                                                                                                                                                                                                                                                                                                                                                                                                                                                                                                                                                                                                                                                                                                                                   |

|                                                                                                                                                                                                                                                                                                                                                                                                                                                                                                                                                                                                                                                                                                                                                                                                                                                                                                                 |                                                                                                                                                                                  | Katowicach                                                                                                                                                                                                                                                                                                                                                                                                                                                                                                                                                                                                                                                                                                                                                                                                                                                                                                                                                |                                                                                                                                                                                                                                                                                                                                                                                                                                                                                                                                                                                                                                                                                                                                                                                                                                                                                                                                          |  |  |
|-----------------------------------------------------------------------------------------------------------------------------------------------------------------------------------------------------------------------------------------------------------------------------------------------------------------------------------------------------------------------------------------------------------------------------------------------------------------------------------------------------------------------------------------------------------------------------------------------------------------------------------------------------------------------------------------------------------------------------------------------------------------------------------------------------------------------------------------------------------------------------------------------------------------|----------------------------------------------------------------------------------------------------------------------------------------------------------------------------------|-----------------------------------------------------------------------------------------------------------------------------------------------------------------------------------------------------------------------------------------------------------------------------------------------------------------------------------------------------------------------------------------------------------------------------------------------------------------------------------------------------------------------------------------------------------------------------------------------------------------------------------------------------------------------------------------------------------------------------------------------------------------------------------------------------------------------------------------------------------------------------------------------------------------------------------------------------------|------------------------------------------------------------------------------------------------------------------------------------------------------------------------------------------------------------------------------------------------------------------------------------------------------------------------------------------------------------------------------------------------------------------------------------------------------------------------------------------------------------------------------------------------------------------------------------------------------------------------------------------------------------------------------------------------------------------------------------------------------------------------------------------------------------------------------------------------------------------------------------------------------------------------------------------|--|--|
| EPI_ISL_3903720                                                                                                                                                                                                                                                                                                                                                                                                                                                                                                                                                                                                                                                                                                                                                                                                                                                                                                 | Usansolo-Galdakao University Hospital                                                                                                                                            | Cruces University Hospital                                                                                                                                                                                                                                                                                                                                                                                                                                                                                                                                                                                                                                                                                                                                                                                                                                                                                                                                | Ana Belén de la Hoz; Ana Gual-de-Torrella; Izaskun Alejo-Cancho; Mikel Gallego                                                                                                                                                                                                                                                                                                                                                                                                                                                                                                                                                                                                                                                                                                                                                                                                                                                           |  |  |
| EPI_ISL_498661, EPI_ISL_605302, EPI_ISL_605348, EPI_ISL_1313770, EPI_ISL_1403843, EPI_ISL_1910668, EPI_ISL_2279847, EPI_ISL_2291481, EPI_ISL_2292116, EPI_ISL_2292385, EPI_ISL_2678348, EPI_ISL_2856386, EPI_ISL_2857771, EPI_ISL_3269997, EPI_ISL_3905032, EPI_ISL_3905166, EPI_ISL_4204778, EPI_ISL_4475044, EPI_ISL_4575531, EPI_ISL_4575831, EPI_ISL_4891150, EPI_ISL_4913546, EPI_ISL_5014133, EPI_ISL_5330437, EPI_ISL_5642558, EPI_ISL_5642568, EPI_ISL_5642946, EPI_ISL_5643024, EPI_ISL_5777873, EPI_ISL_5777920, EPI_ISL_5988079, EPI_ISL_6146936, EPI_ISL_6147022, EPI_ISL_6147106, EPI_ISL_6147111, EPI_ISL_6147129, EPI_ISL_6147519, EPI_ISL_6370692, EPI_ISL_6912292, EPI_ISL_7017174, EPI_ISL_7268847, EPI_ISL_7502651, EPI_ISL_7503009, EPI_ISL_7741629, EPI_ISL_7742469, EPI_ISL_8066268, EPI_ISL_8066794, EPI_ISL_8335482, EPI_ISL_8335715, EPI_ISL_8335772, EPI_ISL_8438825, EPI_ISL_8502016 | Utah Public Health Laboratory                                                                                                                                                    | Utah Public Health Laboratory                                                                                                                                                                                                                                                                                                                                                                                                                                                                                                                                                                                                                                                                                                                                                                                                                                                                                                                             | Alisha Ellington; David R. Hillyard; E. Susan Slechta; Erin L. Young; Erin Young; Heidi Butz; Jeffrey B. Stevenson; John Arn; John Arn; Kelly F. Oakeson; Kelly Oakeson; Melanie A. Mallory; Michael T. Pyne; Olinto Linares-Perdomo; Pooja Gupta; Salika M. Shakir; Tara Gallagher; Tom Iverson                                                                                                                                                                                                                                                                                                                                                                                                                                                                                                                                                                                                                                         |  |  |
| EPI_ISL_3870992                                                                                                                                                                                                                                                                                                                                                                                                                                                                                                                                                                                                                                                                                                                                                                                                                                                                                                 | Utsunomiya City Institute of Public Health and Environment                                                                                                                       | Utsunomiya City Institute of Public Health and Environment                                                                                                                                                                                                                                                                                                                                                                                                                                                                                                                                                                                                                                                                                                                                                                                                                                                                                                | Akira Wakatsuki; Kentaro Itokawa; Makoto Kuroda; Masanori Hashino; Rina Tanaka; Tsuyoshi Sekizuka                                                                                                                                                                                                                                                                                                                                                                                                                                                                                                                                                                                                                                                                                                                                                                                                                                        |  |  |
| EPI_ISL_2283949                                                                                                                                                                                                                                                                                                                                                                                                                                                                                                                                                                                                                                                                                                                                                                                                                                                                                                 | VA Connecticut Healthcare System                                                                                                                                                 | Yale Center for Genomic Analysis                                                                                                                                                                                                                                                                                                                                                                                                                                                                                                                                                                                                                                                                                                                                                                                                                                                                                                                          | Brooke Sullivan; Curt Scharfe; Irina Tikhonova; Kaya Bilguvar; Shrikant Mane                                                                                                                                                                                                                                                                                                                                                                                                                                                                                                                                                                                                                                                                                                                                                                                                                                                             |  |  |
| EPI_ISL_4742205                                                                                                                                                                                                                                                                                                                                                                                                                                                                                                                                                                                                                                                                                                                                                                                                                                                                                                 | VITALAB Molecular Laboratory                                                                                                                                                     | Philippine Genome Center                                                                                                                                                                                                                                                                                                                                                                                                                                                                                                                                                                                                                                                                                                                                                                                                                                                                                                                                  | Alethea R. de Guzman; Anna Ong-Lim; Arianne A. Zamora; Benedict A. Maralit; Carlo M. Lapid; Celia Carlos; Cynthia P. Saloma; Devon Ray Pacial; Diomedes A. Cariño; Edsel Maurice Salvana; El King D. Morado; Elcid Aaron R. Pangilinan; Eva Maria Cutiongco-de la Paz; Francis A. Tablizo; Henrietta Marie Rodriguez; Jaime C. Montoya; Jan Michael C. Yap; Jarvin E. Nipales; Jo-Hannah S. Lames; John Q. Wong; Joshua Gregor A. Dizon; Juan Antonio R. Magalang; Karol Sophia Agape R. Padilla; Kenneth M. Kim; Kris P. Punayan; Kristina Patriz Dela Cruz; Lindsay Clare D.L. Carandang; Ma. Exanil Planting; Marc Edsel C. Ayes; Maria Rosario Singh-Vergeire; Maria Sofia L. Yangzon; Marielle M. Gamboa; Marissa Alejandria; Niña Francesca Bustamante; Razel Nikka M. Hao; Renato Jacinto Q. Mantaring; Rianna Patricia S. Cruz; Shiela Mae M. Araiza; Yvonne Valerie Austria; Zipporah Mariebelle R. Enriquez; Zyrel V. Mollejon |  |  |
| EPI_ISL_2001197                                                                                                                                                                                                                                                                                                                                                                                                                                                                                                                                                                                                                                                                                                                                                                                                                                                                                                 | VRDL, Government Medical College (GMC), Surat                                                                                                                                    | Gujarat Biotechnology Research Centre                                                                                                                                                                                                                                                                                                                                                                                                                                                                                                                                                                                                                                                                                                                                                                                                                                                                                                                     | Chaitanya Joshi; Dinesh Kumar; Janvi Raval; Madhvi Joshi; Neeta Khandelwal; Nitesh Shah; Nitin Savaliya; Ramesh Pandit; Sonal Sharma; Twinkle Soni; Umang Mishra; Zarna Patel; Zuber Saiyed                                                                                                                                                                                                                                                                                                                                                                                                                                                                                                                                                                                                                                                                                                                                              |  |  |
| EPI_ISL_5780359, EPI_ISL_5780393                                                                                                                                                                                                                                                                                                                                                                                                                                                                                                                                                                                                                                                                                                                                                                                                                                                                                | VUMC Molecular Infectious Diseases Laboratory (MIDL)                                                                                                                             | Dr. Suman Das Lab - Vanderbilt University Medical Center (VUMC)                                                                                                                                                                                                                                                                                                                                                                                                                                                                                                                                                                                                                                                                                                                                                                                                                                                                                           | Bookyung Park; Grant Vestal; Helen Boone; Hunter Brown; Jonathan E. Schmitz; Meghan Shiits; Seesandra Rajagopala; Suman B. Pakala; Suman Das                                                                                                                                                                                                                                                                                                                                                                                                                                                                                                                                                                                                                                                                                                                                                                                             |  |  |
| EPI_ISL_2360429                                                                                                                                                                                                                                                                                                                                                                                                                                                                                                                                                                                                                                                                                                                                                                                                                                                                                                 | Vaccines and Infectious Diseases Analytics Research Unit (VIDA)                                                                                                                  | KRISP, KZn Research Innovation and Sequencing Platform                                                                                                                                                                                                                                                                                                                                                                                                                                                                                                                                                                                                                                                                                                                                                                                                                                                                                                    | Baillie Vicky; Giandhari Jennifer; Madhi Shabir; Naidoo Yeshnee; Pillay Sureshnee; San James; Tegally Houriyah; Wilkinson Eduan; de Oliveira Tulio; du Plessis Jeanine                                                                                                                                                                                                                                                                                                                                                                                                                                                                                                                                                                                                                                                                                                                                                                   |  |  |
| EPI_ISL_940880                                                                                                                                                                                                                                                                                                                                                                                                                                                                                                                                                                                                                                                                                                                                                                                                                                                                                                  | Vaccines and Infectious Diseases Analytics Research Unit (VIDA)                                                                                                                  | KRISP, KZn Research Innovation and Sequencing Platform                                                                                                                                                                                                                                                                                                                                                                                                                                                                                                                                                                                                                                                                                                                                                                                                                                                                                                    | Baillie Vicky; Giandhari Jennifer; Madhi Shabir; Naidoo Yeshnee; Pillay Sureshnee; Tegally Houriyah; de Oliveira Tulio; du Plessis Jeanine                                                                                                                                                                                                                                                                                                                                                                                                                                                                                                                                                                                                                                                                                                                                                                                               |  |  |
| EPI_ISL_4368777                                                                                                                                                                                                                                                                                                                                                                                                                                                                                                                                                                                                                                                                                                                                                                                                                                                                                                 | Valais Hospital, Central Institute                                                                                                                                               | Valais Hospital, Central Institute                                                                                                                                                                                                                                                                                                                                                                                                                                                                                                                                                                                                                                                                                                                                                                                                                                                                                                                        | Alexis Dumoulin; Cedric Howald; Deborah Penet; Henri Pegeot; Ioannis Xenarios; Keith Harshman; Lorenzo Cerutti; Melyssa Elies                                                                                                                                                                                                                                                                                                                                                                                                                                                                                                                                                                                                                                                                                                                                                                                                            |  |  |
| EPI_ISL_4274187                                                                                                                                                                                                                                                                                                                                                                                                                                                                                                                                                                                                                                                                                                                                                                                                                                                                                                 | Vestfold Hospital, Toensberg Department of Microbiology                                                                                                                          | Norwegian Institute of Public Health, Department of Virology                                                                                                                                                                                                                                                                                                                                                                                                                                                                                                                                                                                                                                                                                                                                                                                                                                                                                              | Atiya R Ali; Debec Nadia; Engebretsen Serina Beate; Garcia Llorente Ignacio; Hilde Elshaug; Hilde Vollen; Jan Bråte; Kamilla Heddeland Instefjord; Karoline Bragstad; Kathrine Stene-Johansen; Line Victoria Moen; Marie Paulsen Madsen; Olav Hungnes; Pedersen Benedikte Neveen; Rasmus Riis Kopperud                                                                                                                                                                                                                                                                                                                                                                                                                                                                                                                                                                                                                                   |  |  |
| EPI_ISL_3549881                                                                                                                                                                                                                                                                                                                                                                                                                                                                                                                                                                                                                                                                                                                                                                                                                                                                                                 | Vicente Sotto Memorial Medical Center (VSMMC)                                                                                                                                    | Philippine Genome Center                                                                                                                                                                                                                                                                                                                                                                                                                                                                                                                                                                                                                                                                                                                                                                                                                                                                                                                                  | Alethea R. de Guzman; Anna Ong-Lim; Arianne A. Zamora; Benedict A. Maralit; Carlo M. Lapid; Celia Carlos; Cynthia P. Saloma; Devon Ray Pacial; Diomedes A. Cariño; Edsel Maurice Salvana; El King D. Morado; Elcid Aaron R. Pangilinan; Eva Maria Cutiongco-de la Paz; Francis A. Tablizo; Henrietta Marie Rodriguez; Jaime C. Montoya; Jan Michael C. Yap; Jarvin E. Nipales; Jo-Hannah S. Lames; John Q. Wong; Joshua Gregor A. Dizon; Juan Antonio R. Magalang; Karol Sophia Agape R. Padilla; Kenneth M. Kim; Kris P. Punayan; Kristina Patriz Dela Cruz; Lindsay Clare D.L. Carandang; Ma. Exanil Planting; Marc Edsel C. Ayes; Maria Rosario Singh-Vergeire; Maria Sofia L. Yangzon; Marielle M. Gamboa; Marissa Alejandria; Niña Francesca Bustamante; Razel Nikka M. Hao; Renato Jacinto Q. Mantaring; Rianna Patricia S. Cruz; Shiela Mae M. Araiza; Yvonne Valerie Austria; Zipporah Mariebelle R. Enriquez; Zyrel V. Mollejon |  |  |
| EPI_ISL_521467, EPI_ISL_521533, EPI_ISL_522234, EPI_ISL_565164                                                                                                                                                                                                                                                                                                                                                                                                                                                                                                                                                                                                                                                                                                                                                                                                                                                  | Victorian Infectious Diseases Reference Laboratory (VIDRL)                                                                                                                       | VIDRL and MDU-PHL                                                                                                                                                                                                                                                                                                                                                                                                                                                                                                                                                                                                                                                                                                                                                                                                                                                                                                                                         | Caly L.; Caly, L.; Druce J.; M. B.; Sait, M.; Schultz; Schultz M.; Seemann T.; Seemann, T.; Sherry, N.                                                                                                                                                                                                                                                                                                                                                                                                                                                                                                                                                                                                                                                                                                                                                                                                                                   |  |  |
| EPI_ISL_6940961, EPI_ISL_8180074, EPI_ISL_8180214                                                                                                                                                                                                                                                                                                                                                                                                                                                                                                                                                                                                                                                                                                                                                                                                                                                               | Viesoji istaiga Klaipedos universitetine Igonine                                                                                                                                 | National Public Health Surveillance Laboratory                                                                                                                                                                                                                                                                                                                                                                                                                                                                                                                                                                                                                                                                                                                                                                                                                                                                                                            | Ana Steponkiene; Danas Baksa; Jelena Razmuk; Lukas Vasionis; Lukas Zemaitis; Migle Gabrielaite; Svajune Muralyte                                                                                                                                                                                                                                                                                                                                                                                                                                                                                                                                                                                                                                                                                                                                                                                                                         |  |  |
| EPI_ISL_5432207, EPI_ISL_5942209                                                                                                                                                                                                                                                                                                                                                                                                                                                                                                                                                                                                                                                                                                                                                                                                                                                                                | Viesoji istaiga Vilniaus universiteto Igonine Santaros klinikos                                                                                                                  | Vilnius University Hospital Santaros Klinikos, Center of Laboratory Medicine                                                                                                                                                                                                                                                                                                                                                                                                                                                                                                                                                                                                                                                                                                                                                                                                                                                                              | Daniel Naumovas; Dovile Juzopaitė; Gytis Dudas; Ingrida Olendraite; Ligita Raugaite; Monika Katenaitė; Rimvydas Norvilas                                                                                                                                                                                                                                                                                                                                                                                                                                                                                                                                                                                                                                                                                                                                                                                                                 |  |  |
| EPI_ISL_5064621, EPI_ISL_5064625, EPI_ISL_5104562, EPI_ISL_5809207, EPI_ISL_5857695, EPI_ISL_5943695, EPI_ISL_6228408, EPI_ISL_6228485, EPI_ISL_7120395                                                                                                                                                                                                                                                                                                                                                                                                                                                                                                                                                                                                                                                                                                                                                         | see above                                                                                                                                                                        | Vietnamese-German Center for Medical Research (VG-CARE), Vietnamese Military Medical University, Hanoi, Ho-Chi-Minh-City                                                                                                                                                                                                                                                                                                                                                                                                                                                                                                                                                                                                                                                                                                                                                                                                                                  | Hannah Magdalena Krämer; Huy Loc Do; Le Huu Song; Le Thi Kieu Linh; Nghiem Xuan Hoan; Nguyen Linh Toan; Pham Xuan Huy; Salih Kuk; Srinivas Reddy Pallerla; Thirumalaisamy P Velavan; Tran Thanh Tung; Truong Nhat My                                                                                                                                                                                                                                                                                                                                                                                                                                                                                                                                                                                                                                                                                                                     |  |  |
| EPI_ISL_3060071                                                                                                                                                                                                                                                                                                                                                                                                                                                                                                                                                                                                                                                                                                                                                                                                                                                                                                 | Viešoji istaiga Respublikinė Šiaulių Igoninė                                                                                                                                     | Vilnius University Hospital Santaros Klinikos, Center of Laboratory Medicine                                                                                                                                                                                                                                                                                                                                                                                                                                                                                                                                                                                                                                                                                                                                                                                                                                                                              | Daniel Naumovas; Dovile Juzopaitė; Gytis Dudas; Ingrida Olendraite; Ligita Raugaite; Monika Katenaitė; Rimvydas Norvilas                                                                                                                                                                                                                                                                                                                                                                                                                                                                                                                                                                                                                                                                                                                                                                                                                 |  |  |
| EPI_ISL_2339576                                                                                                                                                                                                                                                                                                                                                                                                                                                                                                                                                                                                                                                                                                                                                                                                                                                                                                 | Vilnius University, Life Sciences Center                                                                                                                                         | Vilnius University Hospital Santaros Klinikos, Center of Laboratory Medicine                                                                                                                                                                                                                                                                                                                                                                                                                                                                                                                                                                                                                                                                                                                                                                                                                                                                              | Daniel Naumovas; Dovile Ezerskyte; Gytis Dudas; Ingrida Olendraite; Laimonas Griskevicius; Ligita Raugaite; Mindaugas Stoskus; Monika Katenaitė; Rimvydas Norvilas                                                                                                                                                                                                                                                                                                                                                                                                                                                                                                                                                                                                                                                                                                                                                                       |  |  |
| EPI_ISL_1657820, EPI_ISL_1658153, EPI_ISL_1913680                                                                                                                                                                                                                                                                                                                                                                                                                                                                                                                                                                                                                                                                                                                                                                                                                                                               | Viollier AG                                                                                                                                                                      | Department of Biosystems Science and Engineering, ETH Zurich                                                                                                                                                                                                                                                                                                                                                                                                                                                                                                                                                                                                                                                                                                                                                                                                                                                                                              | Chaoran Chen; Christian Beisel; Christiane Beckmann; Christoph Noppen; David Dreifuss; Deborah Penet; Elodie Burcklen; Emmanuel Dermatzakis; Henri Pegeot; Ina Nissen; Ioannis Xenarios; Ivan Topolsky; Katharina Jahn; Keith Harshman; Lara Fuhrmann; Lorenzo Cerutti; Maurice Redondo; Mirjam Feldkamp; Natascha Santacrose; Niko Beerenwinkel; Noemie Santamaria de Souza; Olivier Kobel; Philipp Jablonski; Rebecca Denes; Sarah Nadeau; Sophie Seidel; Tanja Stadler                                                                                                                                                                                                                                                                                                                                                                                                                                                                |  |  |
| EPI_ISL_451769, EPI_ISL_483661, EPI_ISL_603357, EPI_ISL_693881, EPI_ISL_721765, EPI_ISL_721897, EPI_ISL_899051, EPI_ISL_1002253, EPI_ISL_1002785, EPI_ISL_1003523, EPI_ISL_1004768, EPI_ISL_1004840, EPI_ISL_1004868, EPI_ISL_1130974, EPI_ISL_1259650, EPI_ISL_1259886, EPI_ISL_1260017, EPI_ISL_1260421, EPI_ISL_1260592, EPI_ISL_1360927, EPI_ISL_1360953, EPI_ISL_1407949, EPI_ISL_1496308, EPI_ISL_1598139, EPI_ISL_1598646, EPI_ISL_2019491, EPI_ISL_2374974, EPI_ISL_2462802, EPI_ISL_3296901, EPI_ISL_4233683, EPI_ISL_4234671, EPI_ISL_4486671, EPI_ISL_4487435, EPI_ISL_4580469, EPI_ISL_4581003, EPI_ISL_4791436, EPI_ISL_4904451, EPI_ISL_4908387, EPI_ISL_5066160, EPI_ISL_5102192, EPI_ISL_5531245, EPI_ISL_5532236, EPI_ISL_5532268, EPI_ISL_5864184, EPI_ISL_6857003, EPI_ISL_7566670, EPI_ISL_7653114, EPI_ISL_7696848, EPI_ISL_7696926, EPI_ISL_7888907, EPI_ISL_8350304                      | Department of Biosystems Science and Engineering, ETH Zürich                                                                                                                     | Andrea Patrignani; Andrea Patrizia Salzmann; Andrea Cabral de Gouveia; Catharine Aquino; Catharine Aquino Fournier; Chaoran Chen; Christian Beisel; Christian Urban; Christiane Beckmann; Christoph Noppen; Daniel Ehrsam; David Dreifuss; Deborah Penet; Doris Popovic; Elodie Burcklen; Emmanuel Dermatzakis; Franziska Singer; Griffin White; Hai Bui; Henry Pegeot; Henriette Kurth; Ina Nissen; Ioannis Xenarios; Ivan Topolsky; Jay Tracy; Katharina Jahn; Keith Harshman; Kim Philipp Jablonski; Lara Fuhrmann; Laura Neff; Lennart Opitz; Lorenzo Cerutti; Louis du Plessis; Maria Domenica Moccia; Matteo Carrara; Maurice Redondo; Mirjam Feldkamp; Natascha Santacrose; Niko Beerenwinkel; Noemie Santamaria de Souza; Olivier Kobel; Pedro Ferreira; Pelin Icer; Philipp Jablonski; Ralph Schlapbach; Rebecca Denes; Sarah Nadeau; Shuang Yu; Simon Grüter; Sophie Seidel; Susana Posada-Céspedes; Tanja Stadler; Timothy Sykes; Tobias Schär |                                                                                                                                                                                                                                                                                                                                                                                                                                                                                                                                                                                                                                                                                                                                                                                                                                                                                                                                          |  |  |
| EPI_ISL_2017807                                                                                                                                                                                                                                                                                                                                                                                                                                                                                                                                                                                                                                                                                                                                                                                                                                                                                                 | Viral Respiratory Infections Laboratory, Cantacuzino National Military-Medical Institute                                                                                         | Cantacuzino Institute Virology                                                                                                                                                                                                                                                                                                                                                                                                                                                                                                                                                                                                                                                                                                                                                                                                                                                                                                                            | Catalina Pascu; Luiza Ustean; Mihaela Lazar; Mihaela Oprea; Nicoleta Paraschiv; Sorin Dinu                                                                                                                                                                                                                                                                                                                                                                                                                                                                                                                                                                                                                                                                                                                                                                                                                                               |  |  |
| EPI_ISL_526797, EPI_ISL_526920                                                                                                                                                                                                                                                                                                                                                                                                                                                                                                                                                                                                                                                                                                                                                                                                                                                                                  | Virginia DCLS                                                                                                                                                                    | Virginia DCLS                                                                                                                                                                                                                                                                                                                                                                                                                                                                                                                                                                                                                                                                                                                                                                                                                                                                                                                                             | Virginia DCLS                                                                                                                                                                                                                                                                                                                                                                                                                                                                                                                                                                                                                                                                                                                                                                                                                                                                                                                            |  |  |
| EPI_ISL_1461694, EPI_ISL_1632696, EPI_ISL_2603215, EPI_ISL_5008476, EPI_ISL_5068835, EPI_ISL_5927602, EPI_ISL_8692484                                                                                                                                                                                                                                                                                                                                                                                                                                                                                                                                                                                                                                                                                                                                                                                           | see above                                                                                                                                                                        | Virginia Division of Consolidated Laboratory Services                                                                                                                                                                                                                                                                                                                                                                                                                                                                                                                                                                                                                                                                                                                                                                                                                                                                                                     | Virginia DCLS; Virginia Division of Consolidated Laboratory Services                                                                                                                                                                                                                                                                                                                                                                                                                                                                                                                                                                                                                                                                                                                                                                                                                                                                     |  |  |
| EPI_ISL_723516                                                                                                                                                                                                                                                                                                                                                                                                                                                                                                                                                                                                                                                                                                                                                                                                                                                                                                  | Virginia Division of Consolidated Laboratory Services (DCLS)                                                                                                                     | Virginia Division of Consolidated Laboratory Services (DCLS)                                                                                                                                                                                                                                                                                                                                                                                                                                                                                                                                                                                                                                                                                                                                                                                                                                                                                              | Virginia DCLS                                                                                                                                                                                                                                                                                                                                                                                                                                                                                                                                                                                                                                                                                                                                                                                                                                                                                                                            |  |  |
| EPI_ISL_1050244, EPI_ISL_8445851                                                                                                                                                                                                                                                                                                                                                                                                                                                                                                                                                                                                                                                                                                                                                                                                                                                                                | Virology Department, Royal Infirmary of Edinburgh, NHS Lothian / School of Biological Sciences, University of Edinburgh                                                          | COVID-19 Genomics UK (COG-UK) Consortium                                                                                                                                                                                                                                                                                                                                                                                                                                                                                                                                                                                                                                                                                                                                                                                                                                                                                                                  | Colquhoun R; Cotton S.; Dewar R; Fernandez G; Gallagher A; Hill V; Jackson B; Maloney D; McCrone JT; McHugh M; O'Toole A; Rambaut A; Rooke S; Scher E; Templeton K; Yu X                                                                                                                                                                                                                                                                                                                                                                                                                                                                                                                                                                                                                                                                                                                                                                 |  |  |
| EPI_ISL_489040                                                                                                                                                                                                                                                                                                                                                                                                                                                                                                                                                                                                                                                                                                                                                                                                                                                                                                  | Virology Department, Royal Infirmary of Edinburgh, NHS Lothian / School of Biological Sciences, University of Edinburgh                                                          | Wellcome Sanger Institute for the COVID-19 Genomics UK (COG-UK) consortium                                                                                                                                                                                                                                                                                                                                                                                                                                                                                                                                                                                                                                                                                                                                                                                                                                                                                | Colquhoun R; Cordelia Langford; David K. Jackson; Dewar R; Dominic Kwiatkowski; Ewan Harrison; Hill V; Ian Johnston; Jackson B; John Sillitoe on behalf of the Wellcome Sanger Institute COVID-19 Surveillance Team ( <a href="http://www.sanger.ac.uk/covid-team">http://www.sanger.ac.uk/covid-team</a> ); McCrone JT; McHugh M; O'Toole A; Rambaut A; Roberto Amato; Rooke S; Scher E; Sonia Goncalves; Templeton K and Alex Alderton; Yu X                                                                                                                                                                                                                                                                                                                                                                                                                                                                                           |  |  |
| EPI_ISL_441942, EPI_ISL_475471, EPI_ISL_528392, EPI_ISL_1050831, EPI_ISL_1980401                                                                                                                                                                                                                                                                                                                                                                                                                                                                                                                                                                                                                                                                                                                                                                                                                                | Virology Department, Sheffield Teaching Hospitals NHS Foundation Trust/Department of Infection, Immunity and Cardiovascular Disease, The Medical School, University of Sheffield | COVID-19 Genomics UK (COG-UK) Consortium                                                                                                                                                                                                                                                                                                                                                                                                                                                                                                                                                                                                                                                                                                                                                                                                                                                                                                                  | Adri Angyal; Alex Keeley; Benjamin Lindsey; Carlad Evans; Danielle Groves; Dave Partridge; Katie Johnson; Laura Carrilero; Luke Green; Matthew Parker; Matthew Wyles; Mehmet Yavuz; Mohammad Raza; Nikki Smith; Paul Parsons; Rachel Tucker; Rebecca Brown; Thushan de Silva                                                                                                                                                                                                                                                                                                                                                                                                                                                                                                                                                                                                                                                             |  |  |
| EPI_ISL_1793790, EPI_ISL_5858357, EPI_ISL_8132286                                                                                                                                                                                                                                                                                                                                                                                                                                                                                                                                                                                                                                                                                                                                                                                                                                                               | Virology Laboratory, International Centre for Diarrhoeal Disease Research, Bangladesh (ICDDR,B)                                                                                  | Virology Laboratory, International Centre for Diarrhoeal Disease Research, Bangladesh (ICDDR,B)                                                                                                                                                                                                                                                                                                                                                                                                                                                                                                                                                                                                                                                                                                                                                                                                                                                           | ASM Alamgir; Ahmed Nawsher Alam; Dinesh Mondal; Firdausi Qadri; Hassan Afradi; Mahabur Rahman; Manjur Hossain Khan; Md. Mahfuzur Rahman; Mohammad Enayet Hossain; Mohammad Jubair; Mohammad Shahidul Islam; Mohammed Ziaur Rahman; Moju N Miah; Mustafizur Rahman; Rashedul Hasan; Razib Mazumder; Samir Kumar Saha; Senjuti Saha; Tahmina Shirin                                                                                                                                                                                                                                                                                                                                                                                                                                                                                                                                                                                        |  |  |
| EPI_ISL_1855051, EPI_ISL_2434082                                                                                                                                                                                                                                                                                                                                                                                                                                                                                                                                                                                                                                                                                                                                                                                                                                                                                | Virology Laboratory, Scientific Department, Army Medical Center                                                                                                                  | Virology Laboratory, Scientific Department, Army Medical Center                                                                                                                                                                                                                                                                                                                                                                                                                                                                                                                                                                                                                                                                                                                                                                                                                                                                                           | Anella Monte; Anna Anselmo; Antonella Fortunato; Filippo Molinari; Florigio Lista; Florigio Lista.; Francesco Giordani; Giancarlo Petraliti; Giandomenico Cerreto; Giulia Campoli; Lucia Nicosia; Marzia Cavalli; Riccardo De Sanctis; Rossella Brandi; Silvia Fillo; Vanessa Vera Fain                                                                                                                                                                                                                                                                                                                                                                                                                                                                                                                                                                                                                                                  |  |  |
| EPI_ISL_5260531, EPI_ISL_5803027                                                                                                                                                                                                                                                                                                                                                                                                                                                                                                                                                                                                                                                                                                                                                                                                                                                                                | Virology Unit, Institut Pasteur du Cambodge                                                                                                                                      | Virology Unit, Institut Pasteur du Cambodge                                                                                                                                                                                                                                                                                                                                                                                                                                                                                                                                                                                                                                                                                                                                                                                                                                                                                                               | Cecile Troupin; Chau Darapeak; Chin Savuth; Erik A Karlsson; Jurre Y Siegers; Kraing Sidonn; Leakhena Pum; Ly Sovann; Sophoannedh Rath; Veasna Duong; Yi Sengdeourn                                                                                                                                                                                                                                                                                                                                                                                                                                                                                                                                                                                                                                                                                                                                                                      |  |  |
| EPI_ISL_6364556                                                                                                                                                                                                                                                                                                                                                                                                                                                                                                                                                                                                                                                                                                                                                                                                                                                                                                 | Virology, Universitätsklinikum des Saarlandes                                                                                                                                    | Epigenetics, Saarland University                                                                                                                                                                                                                                                                                                                                                                                                                                                                                                                                                                                                                                                                                                                                                                                                                                                                                                                          | Barbara Berko-Göttel Sascha Tierling; Jörn Walter; Kathrin Kattler; Nastasia Seiwer; Sigrun Smola; Thorsten Pfuhl                                                                                                                                                                                                                                                                                                                                                                                                                                                                                                                                                                                                                                                                                                                                                                                                                        |  |  |
| EPI_ISL_2590073, EPI_ISL_3020956                                                                                                                                                                                                                                                                                                                                                                                                                                                                                                                                                                                                                                                                                                                                                                                                                                                                                | Vita Laboratoriot Oy                                                                                                                                                             | Expert Microbiology, National Institute for Health and Welfare                                                                                                                                                                                                                                                                                                                                                                                                                                                                                                                                                                                                                                                                                                                                                                                                                                                                                            | Carita Savolainen-Kopra; Erika Lindh; Haider al-Hello; Jani Hakilahti; Kirsi Liitsola; Niina Ikonen; Olli Vapalahti; Pekka Ellonen; Phuc Truong; Päivi Laurila; Ravi Kant; Sari Hannula; Soile Blomqvist; Teemu Smura                                                                                                                                                                                                                                                                                                                                                                                                                                                                                                                                                                                                                                                                                                                    |  |  |
| EPI_ISL_2377564, EPI_ISL_2377580                                                                                                                                                                                                                                                                                                                                                                                                                                                                                                                                                                                                                                                                                                                                                                                                                                                                                | Vitalabo Bydgoszcz                                                                                                                                                               | 1. National Institute of Public Health - National Institute of Hygiene; 2. Eurofins Genomics Europe Sequencing GmbH                                                                                                                                                                                                                                                                                                                                                                                                                                                                                                                                                                                                                                                                                                                                                                                                                                       | ECDC COVID-19 WGS support team; Eurofins Genomics Europe Sequencing Team; Gierczyński Rafal; Sadkowska-Todys Małgorzata; Wolkowicz Tomasz; Zacharczuk Katarzyna                                                                                                                                                                                                                                                                                                                                                                                                                                                                                                                                                                                                                                                                                                                                                                          |  |  |
| EPI_ISL_4551650                                                                                                                                                                                                                                                                                                                                                                                                                                                                                                                                                                                                                                                                                                                                                                                                                                                                                                 | Vitomed Sp. z o.o.                                                                                                                                                               | Wojewódzka Stacja Sanitarno-Epidemiologiczna w Katowicach                                                                                                                                                                                                                                                                                                                                                                                                                                                                                                                                                                                                                                                                                                                                                                                                                                                                                                 | Beata Rozwadowska                                                                                                                                                                                                                                                                                                                                                                                                                                                                                                                                                                                                                                                                                                                                                                                                                                                                                                                        |  |  |
| EPI_ISL_2274542                                                                                                                                                                                                                                                                                                                                                                                                                                                                                                                                                                                                                                                                                                                                                                                                                                                                                                 | WESTCHESTER MEDICAL CENTER                                                                                                                                                       | Wadsworth Center, New York State Department of Health                                                                                                                                                                                                                                                                                                                                                                                                                                                                                                                                                                                                                                                                                                                                                                                                                                                                                                     | Alexis Russell; Catharine Prussing; Daryl M. Lamson; Erasmus Schneider; Erica Lasek-Nesselquist; John Kelly; Jonathan Pitnick; Kirsten St. George; Matthew Shudt; Melissa A Leisner; Navjot Singh                                                                                                                                                                                                                                                                                                                                                                                                                                                                                                                                                                                                                                                                                                                                        |  |  |
| EPI_ISL_1039009, EPI_ISL_8109241                                                                                                                                                                                                                                                                                                                                                                                                                                                                                                                                                                                                                                                                                                                                                                                                                                                                                | WHO National Influenza Centre Russian Federation                                                                                                                                 | WHO National Influenza Centre Russian Federation                                                                                                                                                                                                                                                                                                                                                                                                                                                                                                                                                                                                                                                                                                                                                                                                                                                                                                          | Andrey Komissarov; Anna Ivanova; Artem Fadeev; Daria Danilenko; Dmitry Bazhenov; Dmitry Lioznov; Elena Nabieva; Georgii Bazkyin; Kirill Varchenko; Ksenia Safina; Kseniya Komissarova; Maria Pisareva; Maria Timofeeva; Mikhail Bakaev; Nikita Yolshin; Oula Mansour; Tamila Musaeva; Veronika Eder                                                                                                                                                                                                                                                                                                                                                                                                                                                                                                                                                                                                                                      |  |  |

|                                                                                                                                                                                                                                                                                               |                                                                                         |                                                                                                                                                                                              |                                                                                                                                                                                                                                                                                                                                                                                                                                                                                                                                                                                                                                                                                                                                                                                                                                                                                                                   |
|-----------------------------------------------------------------------------------------------------------------------------------------------------------------------------------------------------------------------------------------------------------------------------------------------|-----------------------------------------------------------------------------------------|----------------------------------------------------------------------------------------------------------------------------------------------------------------------------------------------|-------------------------------------------------------------------------------------------------------------------------------------------------------------------------------------------------------------------------------------------------------------------------------------------------------------------------------------------------------------------------------------------------------------------------------------------------------------------------------------------------------------------------------------------------------------------------------------------------------------------------------------------------------------------------------------------------------------------------------------------------------------------------------------------------------------------------------------------------------------------------------------------------------------------|
| EPI_ISL_7835402                                                                                                                                                                                                                                                                               | WIML                                                                                    | 1. Academic Center for Pathomorphological and Genetic-Molecular Diagnostics Ltd, Białystok, Poland<br>2. National Institute of Public Health - National Institute of Hygiene, Warsaw, Poland | Anetta Sulewska; Jacek Nikiłski; Janusz Dzieciół; Joanna Kiślik; Katarzyna Zacharczuk; Konrad Raczkowski; Magdalena Nowakowska; Małgorzata Sadkowska-Todys; Piotr Karabowicz; Piotr Majewski; Przemysław Bieчек. Joanna Reszeć; Radosław Charkiewicz; Tomasz Wolkowicz                                                                                                                                                                                                                                                                                                                                                                                                                                                                                                                                                                                                                                            |
| EPI_ISL_2101819                                                                                                                                                                                                                                                                               | WLA VAMC                                                                                | Pathogen Discovery, Respiratory Viruses Branch, Division of Viral Diseases, Centers for Disease Control and Prevention                                                                       | Adam Retchless; Anna Kelleher; Anna Uehara; Brian Lynch; Clinton R. Paden; Dhvani Batra; Haibin Wang; Han Jia Justin Ng; Jasmine Padilla; Jing Zhang; Justin Lee; Krista Queen; Mark Burroughs; Mili Sheth; Morgan Davis; Peter Cook; Rachel Marine; Sarah Nobles; Suxiang Tong; Tara Coalter; Yan Li; Ying Tao                                                                                                                                                                                                                                                                                                                                                                                                                                                                                                                                                                                                   |
| EPI_ISL_7717073                                                                                                                                                                                                                                                                               | WSSE Katowice                                                                           | Wojewódzka Stacja Sanitarno-Epidemiologiczna w Katowicach                                                                                                                                    | Beata Rozwadowska                                                                                                                                                                                                                                                                                                                                                                                                                                                                                                                                                                                                                                                                                                                                                                                                                                                                                                 |
| EPI_ISL_6563116, EPI_ISL_6563152                                                                                                                                                                                                                                                              | WSSE w Gdansk                                                                           | Wojewódzka Stacja Sanitarno-Epidemiologiczna w Olsztynie, Laboratorium Badan Epidemiologiczno-Klinicznych                                                                                    | Aleksandra Kobiatko; Barbara Dolinska; Emilia Tarabasz; Ewa Liszewska; Marta Lukian; Monika Czerminska; Patryk Bielecki; Paulina Rozycka; Sylwia Krzetowska; Tomasz Jakubczak                                                                                                                                                                                                                                                                                                                                                                                                                                                                                                                                                                                                                                                                                                                                     |
| EPI_ISL_5509560                                                                                                                                                                                                                                                                               | WSSE w Olsztynie                                                                        | Wojewódzka Stacja Sanitarno-Epidemiologiczna w Olsztynie, Laboratorium Badan Epidemiologiczno-Klinicznych                                                                                    | Aleksandra Kobiatko; Barbara Dolinska; Emilia Tarabasz; Ewa Liszewska; Marta Lukian; Monika Czerminska; Patryk Bielecki; Paulina Rozycka; Sylwia Krzetowska; Tomasz Jakubczak                                                                                                                                                                                                                                                                                                                                                                                                                                                                                                                                                                                                                                                                                                                                     |
| EPI_ISL_6810740                                                                                                                                                                                                                                                                               | WSSE w Warszawie                                                                        | 1. Academic Center for Pathomorphological and Genetic-Molecular Diagnostics Ltd, Białystok, Poland<br>2. National Institute of Public Health - National Institute of Hygiene, Warsaw, Poland | Anetta Sulewska; Jacek Nikiłski; Janusz Dzieciół; Joanna Kiślik; Katarzyna Zacharczuk; Konrad Raczkowski; Magdalena Nowakowska; Małgorzata Sadkowska-Todys; Piotr Karabowicz; Piotr Majewski; Przemysław Bieчек. Joanna Reszeć; Radosław Charkiewicz; Tomasz Wolkowicz                                                                                                                                                                                                                                                                                                                                                                                                                                                                                                                                                                                                                                            |
| EPI_ISL_1897507                                                                                                                                                                                                                                                                               | WVT Laboratory, Corvallis, Oregon                                                       | OSU Center for Genome Research and Biocomputing                                                                                                                                              | Oregon State University TRACE Project                                                                                                                                                                                                                                                                                                                                                                                                                                                                                                                                                                                                                                                                                                                                                                                                                                                                             |
| EPI_ISL_1528546                                                                                                                                                                                                                                                                               | WVU Rapid Development Lab                                                               | WVU and Marshall University Combined Genomics Core Facilities                                                                                                                                | "James Denvir; Peter Perrotta; Peter Stoilov; Ryan Percifield"; Wesley Kimble                                                                                                                                                                                                                                                                                                                                                                                                                                                                                                                                                                                                                                                                                                                                                                                                                                     |
| EPI_ISL_3242095                                                                                                                                                                                                                                                                               | WY Public Health Laboratory                                                             | Centers for Disease Control and Prevention Division of Viral Diseases, Pathogen Discovery                                                                                                    | Alex Burgin; Ben L. Rambo-Martin; Clinton R. Paden; Dakota Howard; Dave Wentworth; Dhvani Batra; Jasmine Padilla; Justin Lee; Krista Queen; Kristen Knipe; Kristine Lacek; Mark Burroughs; Matthew Schmeer; Meghan Bentz; Mili Sheth; Peter Cook; Sam Shepard; Sarah Nobles; Suxiang Tong; Vivien Dugan; Yvette Unoarumhi                                                                                                                                                                                                                                                                                                                                                                                                                                                                                                                                                                                         |
| EPI_ISL_677086, EPI_ISL_734339, EPI_ISL_794316                                                                                                                                                                                                                                                | Wadsworth Center, New York State Department of Health                                   | Wadsworth Center, New York State Department of Health                                                                                                                                        | Alexis Russel; Daryl M. Lamson; Erasmus Schneider; Erica Lasek-Nesselquist; John Kelly; Jonathan Pitnick; Kirsten St. George; Matthew Shudt; Melissa A Leisner; Navjot Singh; Sara Griesemer                                                                                                                                                                                                                                                                                                                                                                                                                                                                                                                                                                                                                                                                                                                      |
| EPI_ISL_7714436                                                                                                                                                                                                                                                                               | Wake Forest School of Medicine, Internal Medicine                                       | Wake Forest School of Medicine, Internal Medicine                                                                                                                                            | Gregory Hawkins; Kimberly Reeves                                                                                                                                                                                                                                                                                                                                                                                                                                                                                                                                                                                                                                                                                                                                                                                                                                                                                  |
| EPI_ISL_535234, EPI_ISL_577434, EPI_ISL_577496, EPI_ISL_586006, EPI_ISL_612983, EPI_ISL_628226, EPI_ISL_628309, EPI_ISL_639485, EPI_ISL_680711, EPI_ISL_705435, EPI_ISL_706617, EPI_ISL_726464, EPI_ISL_726512, EPI_ISL_764905, EPI_ISL_823265                                                | Wales Specialist Virology Centre Sequencing lab: Pathogen Genomics Unit                 | COVID-19 Genomics UK (COG-UK) Consortium                                                                                                                                                     | Alec Birchley; Alexander Adams; Amy Gaskin; Angela Marchbank; Bree Gatica-Wilcox; Catherine Moore; Jason Coombes; Joanne Watkins; Joel Southgate; Johnathan Evans; Laura Gifford; Lauren Gilbert; Lee Graham; Malorie Perry; Matthew Bull; Nicole Pacchiarini; Sally Corden; Sara Kumziene-Summerhayes; Sara Rey; Sarah Taylor; Simon Cottrell; Sophie Jones; Tom Connor                                                                                                                                                                                                                                                                                                                                                                                                                                                                                                                                          |
| EPI_ISL_841071, EPI_ISL_922532, EPI_ISL_1637692, EPI_ISL_2520551, EPI_ISL_2520796, EPI_ISL_3181042, EPI_ISL_3181221, EPI_ISL_3181982, EPI_ISL_3296431, EPI_ISL_3296444, EPI_ISL_3297135, EPI_ISL_3297466, EPI_ISL_3297815, EPI_ISL_4797106, EPI_ISL_4801058, EPI_ISL_4802374, EPI_ISL_6146257 | Wales Specialist Virology Centre Sequencing lab: Pathogen Genomics Unit                 | Public Health Wales Microbiology Cardiff Wales Specialist Virology Centre                                                                                                                    | Alec Birchley; Alexander Adams; Amy Gaskin; Angela Marchbank; Bree Gatica-Wilcox; Catherine Moore; Jason Coombes; Joanne Watkins; Joel Southgate; Johnathan Evans; Laura Gifford; Lauren Gilbert; Lee Graham; Malorie Perry; Matthew Bull; Nicole Pacchiarini; Sally Corden; Sara Kumziene-Summerhayes; Sara Rey; Sarah Taylor; Simon Cottrell; Sophie Jones; Tom Connor                                                                                                                                                                                                                                                                                                                                                                                                                                                                                                                                          |
| EPI_ISL_495725, EPI_ISL_497583                                                                                                                                                                                                                                                                | Washington State Department of Health                                                   | Seattle Flu Study                                                                                                                                                                            | Amanda Adler; Barry R. Lutz; Benjamin Pelle; Brian Hiatt; Caitlin R. Wolf; Chris D. Frazar; Deborah A. Nickerson; Elisabeth Brandstetter; Geoff; Geoff Melly; Helen Y. Chu; Janet A. Englund; Jay Shendure; Jover Lee; Kairsten Fay; Kirsten Lacombe; Lea M. Starita; Mark J. Rieder; Matthew Richardson; Matthew Thompson; Melissa Truong; Michael Boeckh; Michael Famulare; Misja Ilcisin; Peter D. Han; Philip Dykema; Romesh Gautam; Scott Lindquist; Thomas R. Sibley; Trevor Bedford                                                                                                                                                                                                                                                                                                                                                                                                                        |
| EPI_ISL_1527276, EPI_ISL_3921811, EPI_ISL_4411096, EPI_ISL_5628424, EPI_ISL_6259014, EPI_ISL_6930479                                                                                                                                                                                          | Washington State Department of Health Public Health Laboratories                        | Washington State Department of Health Public Health Laboratories                                                                                                                             | Avi Singh; Darren Lucas; Denny Russell; Drew MacKellar; Geoff Melly; Hannah Gray; Holly Halstead; Joenice Gonzalez; JohnAric Peterson; Lisa Jones; Philip Dykema; Rebecca Cao; Vanessa De Los Santos                                                                                                                                                                                                                                                                                                                                                                                                                                                                                                                                                                                                                                                                                                              |
| EPI_ISL_2402869, EPI_ISL_4051001                                                                                                                                                                                                                                                              | Weill Cornell Medicine                                                                  | New York Genome Center                                                                                                                                                                       | Amy Baldwin; Andre Corvelo; Arryn Craney; Chris Mason; Dayna M. Oschwald; Hanna Rennert; Lars F Westblade; Margaret Elizabeth Ross; Melissa Cushing; Michael Zody; Olivier Elemento; Priya Velu; Samantha Fennessey; Tom Maniatis                                                                                                                                                                                                                                                                                                                                                                                                                                                                                                                                                                                                                                                                                 |
| EPI_ISL_2422551                                                                                                                                                                                                                                                                               | West African Centre for Cell Biology of Infectious Pathogen, University of Ghana, Legon | WACCBIIP, University of Ghana, Volta Road, Legon, Accra                                                                                                                                      | Collins M. Morang'a; Dominic S.Y. Amuzu; Evelyn B. Quansah; Evelyn Y Bonney; Frederick Tei-Maya; Ivy A Asante; Joe K. Mutungi; John K. Odoom; Joseph HK Bonney; Joyce M. Ngoi; Lawrence Ofori-Boadu; Lucas N. Amenga-Etego and Gordon A Awandare; Mildred Adusei-Poku; Nicaise T. Ndam; Peter K Quashie; Philip M Soglo; Samirah Saaid; Vincent Appiah; Violet McCormack; William K. Ampofo; Yaw Bediako                                                                                                                                                                                                                                                                                                                                                                                                                                                                                                          |
| EPI_ISL_451354                                                                                                                                                                                                                                                                                | West China Hospital of Sichuan University                                               | State Key Laboratory of Biotherapy of Sichuan University                                                                                                                                     | Baowen Du; Binwu Ying; Chao Tang; Chuan Chen; Hancheng Wei; Jia Geng; Jing-wen Lin; Lu Chen; Mingxia Yu; Minjin Wang; Weimin Li; Yongzhao Zhou                                                                                                                                                                                                                                                                                                                                                                                                                                                                                                                                                                                                                                                                                                                                                                    |
| EPI_ISL_666040, EPI_ISL_1050240, EPI_ISL_1247641, EPI_ISL_3958136, EPI_ISL_4768515, EPI_ISL_5465492, EPI_ISL_5465851, EPI_ISL_7169856, EPI_ISL_7732794, EPI_ISL_7732955, EPI_ISL_8270888                                                                                                      | see above                                                                               | West of Scotland Specialist Virology Centre, NHSGCG / MRC- University of Glasgow Centre for Virus Research                                                                                   | COVID-19 Genomics UK (COG-UK) Consortium                                                                                                                                                                                                                                                                                                                                                                                                                                                                                                                                                                                                                                                                                                                                                                                                                                                                          |
| EPI_ISL_5540762, EPI_ISL_5541453, EPI_ISL_5541528                                                                                                                                                                                                                                             | Western Visayas Medical Center (WVMC)                                                   | Philippine Genome Center                                                                                                                                                                     | Alasdair MacLean; Alice Broos; Ana da Silva Filipe; Andy Young; Antonia Ho; Daniel Mair; David L Robertson; Emily Goldstein; Emma Thomson; Gonzalo Yebra; Guy Mollet; Ioulia Tsatsani; James Shepherd; Jenna Nichols; Jessica Benkaroun; Jon Perkins; Jordan Ashworth; Joseph Hughes; Kathy Li; Kathy Smollett; Kirsty Mangin; Kyriaki Nomikou; Lily Tong; Matthew Holden; Natasha Johnson; Nicolas Suarez; Rachael Tomb; Rachel Blacow; Richard Orton; Rory Gunson; Sarah McDonald; Sharif Shaaban; Sreenu Vattipally; Stephen Carmichael                                                                                                                                                                                                                                                                                                                                                                        |
| EPI_ISL_5561470                                                                                                                                                                                                                                                                               | Western Visayas State University - Molecular Diagnostic Laboratory                      | Philippine Genome Center                                                                                                                                                                     | Alethea R. de Guzman; Anna Ong-Lim; Arienne A. Zamora; Benedict A. Maralit; Carlo M. Lapid; Celia Carlos; Cynthia P. Saloma; Devon Ray Pacial; Diomedes A. Cariño; Edsel Maurice Salvana; El King D. Morado; Elcid Aaron R. Pangilinan; Eva Maria Cutiungco-de la Paz; Francis A. Tablizo; Henrietta Marie Rodriguez; Jaime C. Montoya; Jan Michael C. Yap; Jarvin E. Nipales; Jo-Hannah S. Llamas; John Q. Wong; Joshua Gregor A. Magalang; Karol Sophia Agape R. Padilla; Kenneth M. Kim; Kris P. Punayan; Kristina Patriz Dela Cruz; Lindsay Clare D.L. Carandang; Ma. Exanil Plantig; Marc Edsel C. Ayes; Maria Rosario Singh-Vergeire; Maria Sofia L. Yangzon; Marielle M. Gamboa; Marissa Alejandria; Niña Francesca Bustamante; Razel Nikka M. Hao; Renato Jacinto Q. Mantaring; Rianna Patricia S. Cruz; Shiela Mae M. Araiza; Yvonne Valerie Austria; Zipporah Mariebelle R. Enriquez; Zryel V. Mollejon |
| EPI_ISL_2442287, EPI_ISL_2442387                                                                                                                                                                                                                                                              | Wexner Medical Center                                                                   | The Ohio State University College of Medicine                                                                                                                                                | Koenig, S.; Seminetta, J.                                                                                                                                                                                                                                                                                                                                                                                                                                                                                                                                                                                                                                                                                                                                                                                                                                                                                         |
| EPI_ISL_4692688, EPI_ISL_4695687                                                                                                                                                                                                                                                              | Wheeling Hospital                                                                       | WVU and Marshall University Combined Genomics Core Facilities                                                                                                                                | James Denvir; Peter Perrotta; Peter Stoilov; Ryan Percifield; Wesley Kimble                                                                                                                                                                                                                                                                                                                                                                                                                                                                                                                                                                                                                                                                                                                                                                                                                                       |
| EPI_ISL_2689775, EPI_ISL_1745900                                                                                                                                                                                                                                                              | Wichita State University - Molecular Diagnostics Lab                                    | Kansas Health and Environmental Lab                                                                                                                                                          | Ben Olsen; Jonathan Barnell; Katherine Wiggins; Mike Grose; and Phil Adam                                                                                                                                                                                                                                                                                                                                                                                                                                                                                                                                                                                                                                                                                                                                                                                                                                         |
| EPI_ISL_4728059, EPI_ISL_5511333, EPI_ISL_6102072                                                                                                                                                                                                                                             | Willis-Knighton Medical Center Hospital Laboratory                                      | LSUHS Emerging Viral Threat Laboratory                                                                                                                                                       | ECDC COVID-19 WGS support team; Eurofins Genomics Europe Sequencing Team; Gierczynki Rafal; Sadkowska-Todys Małgorzata; Wolkowicz Tomasz; Zacharczuk Katarzyna                                                                                                                                                                                                                                                                                                                                                                                                                                                                                                                                                                                                                                                                                                                                                    |
| EPI_ISL_1269898                                                                                                                                                                                                                                                                               | Wisconsin State Laboratory of Hygiene Communicable Disease Division                     | Ginkgo Bioworks Clinical Laboratory                                                                                                                                                          | Abigail C. Shockey; Alex Plocik; Amanda Riccardi; Becky Schilling; Birgitte Simen; James McGann; Jim Griffin; Keith Robison; Kelsey R. Florek; Malaika Mckenzie-Bennett; Martha Pierson; Michelle Spencer; Rebecca Littlefield                                                                                                                                                                                                                                                                                                                                                                                                                                                                                                                                                                                                                                                                                    |
| EPI_ISL_578595, EPI_ISL_803454, EPI_ISL_942039, EPI_ISL_942056, EPI_ISL_983912, EPI_ISL_1421062, EPI_ISL_1626051, EPI_ISL_1793844, EPI_ISL_2018826, EPI_ISL_2018876, EPI_ISL_2558226, EPI_ISL_3131935, EPI_ISL_3556540, EPI_ISL_4072604, EPI_ISL_4464865, EPI_ISL_5019408                     | see above                                                                               | Wisconsin State Laboratory of Hygiene Communicable Disease Division                                                                                                                          | Abigail C. Shockey; Alicia J. Mooney; Erika M. Hanson; Kelsey R. Florek; Richard Griesser; Sara Wagner; Tonya Danz                                                                                                                                                                                                                                                                                                                                                                                                                                                                                                                                                                                                                                                                                                                                                                                                |
| EPI_ISL_402132                                                                                                                                                                                                                                                                                | Wuhan Jinyintan Hospital                                                                | Hubei Provincial Center for Disease Control and Prevention                                                                                                                                   | Bin Fang; Bo Yang; Bo Yu; Faxian Zhan; Guojun Ye; Jing Li; Junqiang Xu; Kun Cai; Linlin Liu; Xiang Li; Xiao Yu; Xixiang Huo; Yongzhong Jiang.                                                                                                                                                                                                                                                                                                                                                                                                                                                                                                                                                                                                                                                                                                                                                                     |
| EPI_ISL_402124, EPI_ISL_402127, EPI_ISL_402128, EPI_ISL_402130                                                                                                                                                                                                                                | Wuhan Jinyintan Hospital                                                                | Wuhan Institute of Virology, Chinese Academy of Sciences                                                                                                                                     | Ding-Yu Zhang; Hao-Rui Si; Lei Zhang; Peng Zhou; Xing-Lou Yang; Yan Zhu; Zhengli Shi                                                                                                                                                                                                                                                                                                                                                                                                                                                                                                                                                                                                                                                                                                                                                                                                                              |
| EPI_ISL_2726839, EPI_ISL_2728027, EPI_ISL_3298245, EPI_ISL_4638232, EPI_ISL_7502190                                                                                                                                                                                                           | Wyoming Public Health Laboratory                                                        | Wyoming Public Health Laboratory                                                                                                                                                             | Ashley Norberg; Brian Dominguez; Cari Sloma; Channing Weber; Chayse Rowley; Elliot Thomasson; Jim Mildenberger; Marley Goetz; Robert Petit; Sam Britz; Taylor Fearing; and Rob Christensen                                                                                                                                                                                                                                                                                                                                                                                                                                                                                                                                                                                                                                                                                                                        |
| EPI_ISL_1587334, EPI_ISL_4950046, EPI_ISL_5868700, EPI_ISL_6483176                                                                                                                                                                                                                            | Yale Clinical Virology Lab                                                              | Grubaug Lab - Yale School of Public Health                                                                                                                                                   | Anderson Brito; Annie Watkins; Chaney Kalinich; Chantal Vogels; Isabel Ott; Jessica Rothman; Joseph Fauver; Kendall Billig; Mallery Breban; Marie L. Landry; Mary Petrone; Nathan Grubaug; Tara Alpert; Tobias Koch                                                                                                                                                                                                                                                                                                                                                                                                                                                                                                                                                                                                                                                                                               |
| EPI_ISL_2034867                                                                                                                                                                                                                                                                               | Yale Clinical Virology Lab                                                              | Yale Center for Genomic Analysis                                                                                                                                                             | Brooke Sullivan; Curt Scharfe; Irina Tikhonova; Kaya Bilguvar; Shrikant Mane                                                                                                                                                                                                                                                                                                                                                                                                                                                                                                                                                                                                                                                                                                                                                                                                                                      |

|                                                                             |                                                                                                   |                                                                                                   |                                                                                                                                                                                                                                                                                                                                                                                                                                                                                                                                                                                                                                                                                                                                                                                                                                                                                                                                                                                                          |
|-----------------------------------------------------------------------------|---------------------------------------------------------------------------------------------------|---------------------------------------------------------------------------------------------------|----------------------------------------------------------------------------------------------------------------------------------------------------------------------------------------------------------------------------------------------------------------------------------------------------------------------------------------------------------------------------------------------------------------------------------------------------------------------------------------------------------------------------------------------------------------------------------------------------------------------------------------------------------------------------------------------------------------------------------------------------------------------------------------------------------------------------------------------------------------------------------------------------------------------------------------------------------------------------------------------------------|
| EPI_ISL_9219418                                                             | Yamagata Prefectural Institute of Public Health                                                   | Yamagata Prefectural Institute of Public Health                                                   | Akinobu Wada; Hideyuki Shinohara; Junji Seto; Katsumi Mizuta; Kenichi Komabayashi; Kentaro Itokawa; Makoto Kuroda; Masanori Hashino; Midori Taruishi; Mika Sampei; Naomi Ogawa; Rina Tanaka; Tsuyoshi Sekizuka; Waka Tanaka; Yoko Aoki; Yoko Ikeda; Yoshitaka Ishida                                                                                                                                                                                                                                                                                                                                                                                                                                                                                                                                                                                                                                                                                                                                     |
| EPI_ISL_4659490,<br>EPI_ISL_7101309                                         | Yamaguchi Prefectural Institute of Public Health and Environment                                  | Yamaguchi Prefectural Institute of Public Health and Environment                                  | Kanako Kawasaki; Kentaro Itokawa; Makoto Kuroda; Masanori Hashino; Mitsuhiro Kameyama; Rina Tanaka; Tsuyoshi Sekizuka                                                                                                                                                                                                                                                                                                                                                                                                                                                                                                                                                                                                                                                                                                                                                                                                                                                                                    |
| EPI_ISL_5248985                                                             | ZAKŁAD DIAGNOSTYKI LABORATORYJNEJ ZOZ NYSA                                                        | Wojewódzka Stacja Sanitarno-Epidemiologiczna w Katowicach                                         | Beata Rozwadowska                                                                                                                                                                                                                                                                                                                                                                                                                                                                                                                                                                                                                                                                                                                                                                                                                                                                                                                                                                                        |
| EPI_ISL_5865406                                                             | ZLC Zentrallabor Chur                                                                             | Microbiology                                                                                      | Dominique Fabien Hilti; Faina Wehrli; Lorenz Risch; Martin Risch; Nadia Wohlwend; Sinem Kas; Thomas Bodmer                                                                                                                                                                                                                                                                                                                                                                                                                                                                                                                                                                                                                                                                                                                                                                                                                                                                                               |
| EPI_ISL_2727880                                                             | ZOL                                                                                               | Jessa                                                                                             | Marijke Raymaekers et al. on behalf of the Jessa_cmdLab                                                                                                                                                                                                                                                                                                                                                                                                                                                                                                                                                                                                                                                                                                                                                                                                                                                                                                                                                  |
| EPI_ISL_2381618,<br>EPI_ISL_4085639,<br>EPI_ISL_7547745                     | ZOTZ KLIMAS MVZ Düsseldorf-Centrum GbR ÜBAG für Labormedizin, Genetik, Zytologie, Pathologie      | Center of Medical Microbiology, Virology, and Hospital Hygiene, University of Duesseldorf         | Alexander Dilthey; Andreas Walker; Daniel Strelow; Jessica Nicolai; Jörg Timm; Katrin Hoffmann; Klaus Pfeffer; Lisanna Hülse; Malte Kohns Vasconcelos; Maximilian Damagnez; Nadine Lübke; Patrick Finzer; Rainer Zolt; Tobias Wienemann; Torsten Houwaart                                                                                                                                                                                                                                                                                                                                                                                                                                                                                                                                                                                                                                                                                                                                                |
| EPI_ISL_6866353                                                             | Zakład Mikrobiologii WSZZ                                                                         | Wojewodzka Stacja Sanitarno-Epidemiologiczna w Rzeszowie, Laboratorium Diagnostyki Medycznej      | Anna Nowakowska; Karolina Ostrowska; Katarzyna Wilk; Marzena Baranowska                                                                                                                                                                                                                                                                                                                                                                                                                                                                                                                                                                                                                                                                                                                                                                                                                                                                                                                                  |
| EPI_ISL_4551668,<br>EPI_ISL_6223308,<br>EPI_ISL_8420920                     | Zakład Genetyki Synevo                                                                            | Wojewódzka Stacja Sanitarno-Epidemiologiczna w Katowicach                                         | Adrian Miara; Agata Chajda; Beata Rozwadowska; Elżbieta Bartkowiak; Marta Albertyńska                                                                                                                                                                                                                                                                                                                                                                                                                                                                                                                                                                                                                                                                                                                                                                                                                                                                                                                    |
| EPI_ISL_4715198,<br>EPI_ISL_4715882,<br>EPI_ISL_5562437                     | Zamboanga City Medical Center-Department of Agriculture Satellite Laboratory for COVID-19 Testing | Philippine Genome Center                                                                          | Alethea R. de Guzman; Alyssa Joyce E. Telles; Anna Ong-Lim; Arianne A. Zamora; Benedict A. Maralit; Carlo M. Lapid; Celia Carlos; Cynthia P. Saloma; Devon Ray Pacial; Diomedes A. Cariño; Edsel Maurice Salvana; El King D. Morado; Elcid Aaron R. Pangilinan; Eva Maria Cutiongco-de la Paz; Francis A. Tablizo; Henrietta Marie Rodriguez; Jaime C. Montoya; Jan Michael C. Yap; Jarvin E. Nipales; Jo-Hannah S. Llamas; John Michael Egana; John Q. Wong; Joshua Gregor A. Dizon; Joshua Jose Endozo; Juan Antonio R. Magalang; Karol Sophia Agape R. Padilla; Kenneth M. Kim; Kris P. Punayan; Kristina Patriz Dela Cruz; Lindsay Clare D.L. Carandang; Ma. Exanil Plantig; Marc Edsel C. Ayes; Maria Rosario Singh-Vergeire; Maria Sofia L. Yangzon; Marielle M. Gamboa; Marissa Alejandria; Niña Francesca Bustamante; Razel Nikka M. Hao; Renato Jacinto Q. Mantaring; Rianna Patricia S. Cruz; Shiela Mae M. Araiza; Yvonne Valerie Austria; Zipporah Mariebelle R. Enriquez; Zyrel V. Mollejon |
| EPI_ISL_4741360                                                             | Zamboanga Del Sur Medical Center PCR Laboratory                                                   | Philippine Genome Center                                                                          | Alethea R. de Guzman; Anna Ong-Lim; Arianne A. Zamora; Benedict A. Maralit; Carlo M. Lapid; Celia Carlos; Cynthia P. Saloma; Devon Ray Pacial; Diomedes A. Cariño; Edsel Maurice Salvana; El King D. Morado; Elcid Aaron R. Pangilinan; Eva Maria Cutiongco-de la Paz; Francis A. Tablizo; Henrietta Marie Rodriguez; Jaime C. Montoya; Jan Michael C. Yap; Jarvin E. Nipales; Jo-Hannah S. Llamas; John Q. Wong; Joshua Gregor A. Dizon; Juan Antonio R. Magalang; Karol Sophia Agape R. Padilla; Kenneth M. Kim; Kris P. Punayan; Kristina Patriz Dela Cruz; Lindsay Clare D.L. Carandang; Ma. Exanil Plantig; Marc Edsel C. Ayes; Maria Rosario Singh-Vergeire; Maria Sofia L. Yangzon; Marielle M. Gamboa; Marissa Alejandria; Niña Francesca Bustamante; Razel Nikka M. Hao; Renato Jacinto Q. Mantaring; Rianna Patricia S. Cruz; Shiela Mae M. Araiza; Yvonne Valerie Austria; Zipporah Mariebelle R. Enriquez; Zyrel V. Mollejon                                                                 |
| EPI_ISL_9384384                                                             | Zavod za javno zdravstvo Dubrovačko-Neretvanske županije                                          | Hrvatski zavod za javno zdravstvo                                                                 | Anita Jurić; Dragan Jurić; Irena Tabain; Ivana Ferenčak; Josipa Kuzle                                                                                                                                                                                                                                                                                                                                                                                                                                                                                                                                                                                                                                                                                                                                                                                                                                                                                                                                    |
| EPI_ISL_8842902                                                             | Zavod za javno zdravstvo Istarske županije                                                        | Hrvatski zavod za javno zdravstvo                                                                 | Anita Jurić; Dragan Jurić; Irena Tabain; Ivana Ferenčak; Josipa Kuzle                                                                                                                                                                                                                                                                                                                                                                                                                                                                                                                                                                                                                                                                                                                                                                                                                                                                                                                                    |
| EPI_ISL_7600060                                                             | Zavod za javno zdravstvo Međimurske županije                                                      | Hrvatski zavod za javno zdravstvo                                                                 | Anita Jurić; Dragan Jurić; Irena Tabain; Ivana Ferenčak; Josipa Kuzle                                                                                                                                                                                                                                                                                                                                                                                                                                                                                                                                                                                                                                                                                                                                                                                                                                                                                                                                    |
| EPI_ISL_8590064                                                             | Zavod za javno zdravstvo Osječko-Baranjske županije                                               | Hrvatski zavod za javno zdravstvo                                                                 | Anita Jurić; Dragan Jurić; Irena Tabain; Ivana Ferenčak; Josipa Kuzle                                                                                                                                                                                                                                                                                                                                                                                                                                                                                                                                                                                                                                                                                                                                                                                                                                                                                                                                    |
| EPI_ISL_8588968,<br>EPI_ISL_8841533                                         | Zavod za javno zdravstvo Varaždinske županije                                                     | Hrvatski zavod za javno zdravstvo                                                                 | Anita Jurić; Dragan Jurić; Irena Tabain; Ivana Ferenčak; Josipa Kuzle                                                                                                                                                                                                                                                                                                                                                                                                                                                                                                                                                                                                                                                                                                                                                                                                                                                                                                                                    |
| EPI_ISL_9447359                                                             | Zavod za javno zdravstvo Vukovarsko-srijemske županije                                            | Hrvatski zavod za javno zdravstvo                                                                 | Anita Jurić; Dragan Jurić; Irena Tabain; Ivana Ferenčak; Josipa Kuzle                                                                                                                                                                                                                                                                                                                                                                                                                                                                                                                                                                                                                                                                                                                                                                                                                                                                                                                                    |
| EPI_ISL_7880281,<br>EPI_ISL_8174368                                         | Zavod za javno zdravstvo Zagrebačke županije                                                      | Hrvatski zavod za javno zdravstvo                                                                 | Anita Jurić; Dragan Jurić; Irena Tabain; Ivana Ferenčak; Josipa Kuzle                                                                                                                                                                                                                                                                                                                                                                                                                                                                                                                                                                                                                                                                                                                                                                                                                                                                                                                                    |
| EPI_ISL_7285859,<br>EPI_ISL_7731471                                         | Zdravotni uestav Űsti nad Labem                                                                   | Institute of Medical Microbiology and Virology, University Hospital Carl Gustav Carus, TU Dresden | Alexa Laubner; Alexander Dalpke; Anett Zabzinski; Eva Patrasová; Fabian Rost; Grit Mehner; Ivana Stiborová; Jitka Pohořská; Lenka Šimůnková; Marlena Stadtmüller; Montserrat Palau de Miquel; Romana Mikešová; Susanne Reinhardt; Sylke Winkler; Sylvia Klemroth                                                                                                                                                                                                                                                                                                                                                                                                                                                                                                                                                                                                                                                                                                                                         |
| EPI_ISL_404227                                                              | Zhejiang Provincial Center for Disease Control and Prevention                                     | Department of Microbiology, Zhejiang Provincial Center for Disease Control and Prevention         | Chen Chen; Chonggao Hu; Enfu Chen; Fang Xu; Haiyan Mao; Hanping Zhu; Hao Yan; Jian Gao; Jianmin Jiang; Junhang Pan; Juying Yan; Liming Gong; Qiong Ge; Wen Shi; Wenwu Yao; Xinying Wang; Xiuyu Lou; Yan Feng; Yanjun Zhang; Yi Sun; Yin Chen; Yisheng Sun; Yiyu Lu; Zhangnv Yang; Zhen Li; Zhen Wang; Zhiping Chen                                                                                                                                                                                                                                                                                                                                                                                                                                                                                                                                                                                                                                                                                       |
| EPI_ISL_6952065                                                             | alphaomega Labor GbR (Medizinische Kooperationsgemeinschaft Dres. Ackermann/Tennert/Zaiß)         | Robert Koch Institute                                                                             |                                                                                                                                                                                                                                                                                                                                                                                                                                                                                                                                                                                                                                                                                                                                                                                                                                                                                                                                                                                                          |
| EPI_ISL_4040234,<br>EPI_ISL_7423699                                         | amedes Göttingen                                                                                  | Robert Koch Institute                                                                             |                                                                                                                                                                                                                                                                                                                                                                                                                                                                                                                                                                                                                                                                                                                                                                                                                                                                                                                                                                                                          |
| EPI_ISL_3121260,<br>EPI_ISL_8227916                                         | amedes MVZ DIAMEDIS Sennestadt                                                                    | Robert Koch Institute                                                                             |                                                                                                                                                                                                                                                                                                                                                                                                                                                                                                                                                                                                                                                                                                                                                                                                                                                                                                                                                                                                          |
| EPI_ISL_2632255                                                             | amedes MVZ Jena                                                                                   | Robert Koch Institute                                                                             |                                                                                                                                                                                                                                                                                                                                                                                                                                                                                                                                                                                                                                                                                                                                                                                                                                                                                                                                                                                                          |
| EPI_ISL_1645143                                                             | amedes MVZ fÄ¼r Laboratoriumsmedizin FÄ¼rstenfeldbruck                                            | Robert Koch Institute                                                                             |                                                                                                                                                                                                                                                                                                                                                                                                                                                                                                                                                                                                                                                                                                                                                                                                                                                                                                                                                                                                          |
| EPI_ISL_4440021                                                             | amedes MVZ für Laboratoriumsdiagnostik Raubling GmbH                                              | Robert Koch Institute                                                                             |                                                                                                                                                                                                                                                                                                                                                                                                                                                                                                                                                                                                                                                                                                                                                                                                                                                                                                                                                                                                          |
| EPI_ISL_1436801                                                             | amedes MVZ für Labordiagnostik Rhein-Main                                                         | Robert Koch Institute                                                                             |                                                                                                                                                                                                                                                                                                                                                                                                                                                                                                                                                                                                                                                                                                                                                                                                                                                                                                                                                                                                          |
| EPI_ISL_828101                                                              | deCODE genetics                                                                                   | deCODE genetics                                                                                   | Agnar Helgason; Alma Moller; Anna B Agustsdottir; Arnaldur Gylfason; Asgeir Sigurdsson; Aslaug Jonasdottir; Berglind Eiríksdottir; Bjarni Thorbjörnsson; Brynjar O. Jenson; Daniel F Guðbjartsson; Droplaug N Magnúsdóttir; Elisabet E Gardarsdóttir; Emil A Thórarrensen; Gardar Sveinbjörnsson; Gisli Masson; Guðmundur Georgsson; Guðmundur L Norddahl; Guðrun Sigmundsdóttir; Hakon Jonsson; Hannes Eggertsson; Hilma Holm; Ingileif Jónsdóttir; Jóna Saemundsdóttir; Kamilla S Josefsdóttir; Karl Stefánsson; Karl G Kristinnsson; Kjartan R Guðmundsson; Kristin E Sveinsdóttir; Louise le Roux; Maney Sveinsdóttir; Olafía S Gretarsdóttir; Ólafur T Magnússon; Páll Melsted; Patrick Sulem; Run Fridriksdóttir; Solví Rognvaldsson; Thora R Gunnarsdóttir; Thordur Kristjánsson; Thorólfur Guðnason; Unnur Thorsteinsdóttir                                                                                                                                                                      |
| EPI_ISL_1250927                                                             | genXone SA, Molecular Diagnostics Laboratory / NZOZ                                               | genXone SA, Research & Development Laboratory                                                     | Aleksandra Gidlewicz; Anna Brylak-Blaszkow; Grzegorz Nowicki; Jakub Grabowski; Karol Szeszko; Lukasz Krych; Maciej Sykulski; Michal Kaszuba; Natalia Drweska-Matelska                                                                                                                                                                                                                                                                                                                                                                                                                                                                                                                                                                                                                                                                                                                                                                                                                                    |
| EPI_ISL_1262813                                                             | hopital                                                                                           | National Reference Center for Viruses of Respiratory Infections, Institut Pasteur, Paris          | Angela Brisebarre; Camille Capel; Etienne Simon-Lorière; Leruez-Ville Marianne; Marion Barbet; Maud Vanpeene; Méline Bizard; Sylvie Behillili; Sylvie van der Werf; Vincent Enouf                                                                                                                                                                                                                                                                                                                                                                                                                                                                                                                                                                                                                                                                                                                                                                                                                        |
| EPI_ISL_2095746                                                             | jessa                                                                                             | Jessa                                                                                             | Berden et al. on behalf of the Jessa_cmdLab                                                                                                                                                                                                                                                                                                                                                                                                                                                                                                                                                                                                                                                                                                                                                                                                                                                                                                                                                              |
| EPI_ISL_4586799,<br>EPI_ISL_5933298,<br>EPI_ISL_5933444,<br>EPI_ISL_6823971 | labor team w AG                                                                                   | Department of Biosystems Science and Engineering, ETH Zürich                                      | Andrea Patrignani; Andreas Lindauer; Andrea Cabral de Gouvea; Catharine Aquino; Chaoran Chen; Daniel Ehrsam; Doris Popovic; Griffin White; Isabel Stürmer; Ivan Topolsky; Jay Tracy; Kim Philipp Jablonski; Lara Fuhrmann; Laura Neff; Lennart Opitz; Louis du Plessis; Maria Domenica Moccia; Monika Bucher; Niko Beerewinkel; Ralph Schlappbach; Rebekka Pohl; Sarah Nadeau; Simon Grüter; Tanja Stadler; Timothy Sykes                                                                                                                                                                                                                                                                                                                                                                                                                                                                                                                                                                                |
| EPI_ISL_3983418                                                             | laboratorium Diagnostyczne Genomika                                                               | Wojewodzka Stacja Sanitarno-Epidemiologiczna w Gorzowie Wielkopolskim                             | Elzbieta Justynska; Klaudia Kobenda-Wlodarczak; Patrycja Faberska and Marek Magol; Renata Siegel                                                                                                                                                                                                                                                                                                                                                                                                                                                                                                                                                                                                                                                                                                                                                                                                                                                                                                         |
| EPI_ISL_1850667,<br>EPI_ISL_1850713                                         | nordlab - Partnerschafspraxis ful`r Laboratoriumsmedizin                                          | Robert Koch Institute                                                                             |                                                                                                                                                                                                                                                                                                                                                                                                                                                                                                                                                                                                                                                                                                                                                                                                                                                                                                                                                                                                          |
| EPI_ISL_4934097                                                             | nordlab - Partnerschafspraxis für Laboratoriumsmedizin                                            | Robert Koch Institute                                                                             |                                                                                                                                                                                                                                                                                                                                                                                                                                                                                                                                                                                                                                                                                                                                                                                                                                                                                                                                                                                                          |
| EPI_ISL_1250954                                                             | siesp Chieti                                                                                      | Istituto Zooprofilattico Sperimentale dell'Abruzzo e Molise "G. Caporale"                         | Ancora M; Calistri P; Cammà C; Curini V; Di Domenico M; Di Pasquale A; Lorusso A; Mangone I; Marccaci M; Puglia I; Rinaldi A; Savini G; Scialabba S                                                                                                                                                                                                                                                                                                                                                                                                                                                                                                                                                                                                                                                                                                                                                                                                                                                      |
| EPI_ISL_4292089,<br>EPI_ISL_4294240,<br>EPI_ISL_4295465                     | unknown                                                                                           | CNR Virus des Infections Respiratoires - France SUD                                               | Antonin Bal; Bruno Lina; Gregory Destras; Gwendolyne Burfin; Hadrien Regue; Laurence Josset; Martine Valette; Quentin Semanas                                                                                                                                                                                                                                                                                                                                                                                                                                                                                                                                                                                                                                                                                                                                                                                                                                                                            |
| EPI_ISL_848623                                                              | Evandro Chagas Institute                                                                          | Evandro Chagas Institute                                                                          | A.M.; Barbagelata; E.C.; E.M.A.; Ferreira; J.A.; Junior; K.C.; L.C.; L.S.; M.C.; P.S.; Pinheiro; Santos; Silva; Sousa; Sousa Junior; W.D.C.; da Silva                                                                                                                                                                                                                                                                                                                                                                                                                                                                                                                                                                                                                                                                                                                                                                                                                                                    |
